# Supplementary material for: Respiratory syncytial virus infection changes the piwi-interacting RNA content of airway epithelial cells
Source: Front Mol Biosci. 2022 Sep 8;9:931354. doi: 10.3389/fmolb.2022.931354 (PMC9493205; doi:10.3389/fmolb.2022.931354)
Supplement: Supplementary file 2 [file Table1.XLSX]

## Sheet: Table of Contents
TABLE OF CONTENTS FOR SUPPLEMENTARY FILES
S1	With Targets Both Log Times 6h Norm Median Point log limit 0.01
S2	With Targets Both Log Times 15h Norm Median Point log limit 0.01
S3	With Targets Both Log Times 24h Norm Median Point log limit 0.01
S4	BP Full List 6h RSV pi Targets Norm Median Point Log pv 0.01
S5	CC Full List 6h RSV pi Targets Norm Median Point Log pv 0.01
S6	MF Full List 6h RSV pi Targets Norm Median Point Log pv 0.01
S7	BP Full List 15h RSV pi Targets Norm Median Point Log pv 0.01
S8	CC Full List 15h RSV pi Targets Norm Median Point Log pv 0.01
S9	MF Full List 15h RSV pi Targets Norm Median Point Log pv 0.01
S10	BP Full List 24h RSV pi Targets Norm Median Point Log pv 0.01
S11	CC Full List 24h RSV pi Targets Norm Median Point Log pv 0.01
S12	MF Full List 24h RSV pi Targets Norm Median Point Log pv 0.01
S13	Clustered snorm0_01_3
S14	Clustered snorm0_01_5
S15	GO cluster 0
S15	GO cluster 1
S15	GO cluster 2
S15	GO cluster 3
S15	GO cluster 4

## Sheet: S1
l	Name	ID	Accession Number	linear_average _mock	linear_average _time_6h_RSV_infection	log2_linear_average_6h_mock	p_value_6h_mock	benj_0_6	bonf_0_6	TARGETS
62	piR-45856	hsa_piRNA_16215	DQ577744P	13.9511	1.89993	-2.74696	0.000102696	0.02531	1
60	piR-45855	hsa_piRNA_16216	DQ577743P	15.1041	2.55776	-2.45281	0.000101204	0.02577	1	RP11-434D2.3,TBC1D3P4,TBC1D3P3
45	piR-45854	hsa_piRNA_16217	DQ577742P	15.2013	2.91236	-2.29403	6.3152e-05	0.02144	0.9649	TBC1D3P3,RP11-434D2.3,TBC1D3P4
94	piR-45512	hsa_piRNA_16559	DQ577400P	1.33624	0.22525	-2.19179	0.00022353	0.03633	1	NINJ2,RP5-1154L15.2
43	piR-32882	hsa_piRNA_29189	DQ582770P	0.96431	0.19548	-2.13022	6.2832e-05	0.02233	0.96001	RP11-299H22.3
56	piR-56993	hsa_piRNA_5078	DQ589881P	6.71155	1.56852	-2.11364	8.4427e-05	0.02304	1	RP5-1165K10.2,POLR2J3,UPK3BL,AC004951.5,RP11-514P8.7,RP11-514P8.8,POLR2J4,RP11-514P8.6,POLR2J2
9	piR-31311	hsa_piRNA_30760	DQ571199P	11.9122	2.7815	-2.07837	1.929e-06	0.00327	0.02947	ASIC2,ADAM23,SLC27A2,CASC1
105	piR-30049	hsa_piRNA_32022	DQ569937P	16.418	3.20373	-2.01276	0.00034212	0.04978	1	RP11-184C23.4,RP11-440J4.2,RP11-613H2.1
31	piR-47273	hsa_piRNA_14798	DQ579161P	27.6627	6.65331	-2.00848	4.2757e-05	0.02107	0.65328	PHF2P2,LINC00442
154	piR-32318	hsa_piRNA_29753	DQ582206P	7.93137	1.35976	-1.9861	0.0007992	0.07929	1	LINC01120
2	piR-57170	hsa_piRNA_4901	DQ590058P	36.584	9.49276	-1.96388	1.1115e-07	0.00085	0.0017	GOLGA2P11
325	piR-34509	hsa_piRNA_27562	DQ596443P	0.54896	0.07991	-1.93279	0.0037015	0.17402	1
187	piR-61070	hsa_piRNA_1001	DQ594958P	1.90613	0.40916	-1.81073	0.00120311	0.0983	1
346	piR-51890	hsa_piRNA_10181	DQ584778P	0.97841	0.17401	-1.72695	0.0041585	0.18364	1
74	piR-37981	hsa_piRNA_24090	DQ599915P	3.12083	0.94648	-1.70771	0.000143105	0.02955	1	STARD9
84	piR-37268	hsa_piRNA_24803	DQ599202P	0.28532	0.09047	-1.64548	0.000175657	0.03195	1
332	piR-32804	hsa_piRNA_29267	DQ582692P	5.60654	1.20669	-1.61981	0.0038991	0.17944	1	AP002856.5,LINC01320,CLEC12A,LINC01362,ADARB2,INVS,LINC01378,RP11-529E15.1,GNGT1,DPY19L1P2,LINC01090,DNAH12,PKHD1,CNTNAP2,RP11-33A14.1
179	piR-32729	hsa_piRNA_29342	DQ582617P	0.30147	0.09726	-1.60953	0.00107977	0.09217	1
11	piR-41112	hsa_piRNA_20959	DQ573000P	2.89772	0.97937	-1.57067	2.4771e-06	0.00344	0.03785	RP3-468B3.2
116	piR-31668	hsa_piRNA_30403	DQ571556P	2.67569	0.81173	-1.56999	0.00043522	0.05733	1
123	piR-47807	hsa_piRNA_14264	DQ579695P	9.88242	3.13667	-1.569	0.00051834	0.06439	1	DSP
8	piR-42438	hsa_piRNA_19633	DQ574326P	24.3947	8.14823	-1.56334	1.6759e-06	0.0032	0.02561
117	piR-52755	hsa_piRNA_9316	DQ585643P	36.1069	12.3894	-1.53814	0.00044266	0.05781	1	DSP
400	piR-36919	hsa_piRNA_25152	DQ598853P	11.6976	2.66497	-1.53793	0.0055409	0.21165	1	PGBD1
468	piR-34283	hsa_piRNA_27788	DQ596217P	3.29575	0.69102	-1.5162	0.0071634	0.23387	1	RP1-63G5.5
114	piR-61459	hsa_piRNA_612	DQ595347P	6.89869	2.60417	-1.51041	0.00042117	0.05645	1
134	piR-46025	hsa_piRNA_16046	DQ577913P	24.7836	8.35949	-1.49998	0.00060344	0.06881	1	RP11-259G18.2,RP11-707O23.5
448	piR-57482	hsa_piRNA_4589	DQ590370P	10.0616	2.31531	-1.48703	0.0066822	0.2279	1	NPAP1P6
10	piR-57925	hsa_piRNA_4146	DQ590813P	24.2616	8.93209	-1.47893	2.1834e-06	0.00334	0.03336	RP1-63G5.5
373	piR-34885	hsa_piRNA_27186	DQ596819P	3.10639	0.77379	-1.47447	0.0047207	0.19337	1	LINC01016
160	piR-47209	hsa_piRNA_14862	DQ579097P	4.56393	1.56198	-1.45141	0.00090144	0.08608	1	CROCCP3
57	piR-34641	hsa_piRNA_27430	DQ596575P	34.1911	12.499	-1.44718	9.514e-05	0.0255	1	CTC-523E23.4,CTC-523E23.1
24	piR-43175	hsa_piRNA_18896	DQ575063P	11.7289	4.23165	-1.44362	2.3878e-05	0.0152	0.36483	LINC01016
12	piR-34012	hsa_piRNA_28059	DQ593900P	0.69977	0.26086	-1.44233	2.6659e-06	0.00339	0.04073	SPATA8-AS1
208	piR-60643	hsa_piRNA_1428	DQ594531P	0.70115	0.21082	-1.40034	0.00157841	0.11594	1	FABP5P11,FABP5P1,STX3,RP11-363E6.3,AKAP13,CTD-2262B20.1,FABP5P2,FABP5P7,FABP5,ATP7B
133	piR-46271	hsa_piRNA_15800	DQ578159P	1.66132	0.58222	-1.38558	0.00059637	0.06851	1	TUBBP1,TUBB,TUBBP2
38	piR-34141	hsa_piRNA_27930	DQ596075P	5.50652	2.06971	-1.38117	6.0652e-05	0.02439	0.9267	RP11-114H24.7,RP11-114H24.2
376	piR-47752	hsa_piRNA_14319	DQ579640P	2.13037	0.63594	-1.35436	0.0048006	0.19508	1	DNM1P46,DNM1P47
314	piR-43134	hsa_piRNA_18937	DQ575022P	0.48861	0.17051	-1.35333	0.0034592	0.16832	1	CTSB
21	piR-31841	hsa_piRNA_30230	DQ571729P	0.90704	0.34586	-1.3486	1.93757e-05	0.0141	0.29604
504	piR-46972	hsa_piRNA_15099	DQ578860P	0.45672	0.12199	-1.34292	0.0083606	0.25346	1	FAM95B1,RP11-146D12.2
472	piR-59927	hsa_piRNA_2144	DQ592815P	162.821	49.7255	-1.33726	0.0072978	0.23624	1
427	piR-44295	hsa_piRNA_17776	DQ576183P	3.00648	0.84742	-1.33442	0.006141	0.21974	1	LINC01016
465	piR-58194	hsa_piRNA_3877	DQ591082P	1.35999	0.39569	-1.33052	0.0070989	0.23326	1
176	piR-35306	hsa_piRNA_26765	DQ597240P	3.10802	1.29039	-1.32425	0.00106419	0.09238	1
416	piR-44296	hsa_piRNA_17775	DQ576184P	2.93865	0.86259	-1.32008	0.0059582	0.21883	1	LINC01016
4	piR-55252	hsa_piRNA_6819	DQ588140P	0.96078	0.37828	-1.31374	9.1201e-07	0.00348	0.01393
447	piR-44294	hsa_piRNA_17777	DQ576182P	4.94354	1.48256	-1.26515	0.0066042	0.22574	1	LINC01016
415	piR-38375	hsa_piRNA_23696	DQ600309P	0.44681	0.14613	-1.2634	0.005922	0.21803	1	USP20
16	piR-50471	hsa_piRNA_11600	DQ583359P	2.22659	0.93112	-1.26198	1.5075e-05	0.0144	0.23033
26	piR-55251	hsa_piRNA_6820	DQ588139P	1.13932	0.46243	-1.25882	3.5299e-05	0.02074	0.53933
42	piR-33094	hsa_piRNA_28977	DQ592982P	3.75396	1.54977	-1.24853	6.2532e-05	0.02275	0.95543
25	piR-31077	hsa_piRNA_30994	DQ570965P	0.67333	0.27989	-1.2481	2.4789e-05	0.01515	0.37875	HTR5BP
51	piR-32305	hsa_piRNA_29766	DQ582193P	205.774	86.2841	-1.22475	7.8532e-05	0.02353	1
81	piR-43641	hsa_piRNA_18430	DQ575529P	1.30059	0.5397	-1.21065	0.000157829	0.02977	1
40	piR-37076	hsa_piRNA_24995	DQ599010P	3.53118	1.51495	-1.20828	6.1764e-05	0.02359	0.94369
527	piR-55584	hsa_piRNA_6487	DQ588472P	0.7692	0.24669	-1.2056	0.0091178	0.26435	1
536	piR-61494	hsa_piRNA_577	DQ595382P	0.34609	0.10608	-1.19932	0.009481	0.27026	1	RP1-63G5.5
418	piR-43424	hsa_piRNA_18647	DQ575312P	0.42412	0.17695	-1.19923	0.0059968	0.2192	1
19	piR-39755	hsa_piRNA_22316	DQ601689P	0.73283	0.3192	-1.19895	1.71883e-05	0.01382	0.26262	TDRG1
482	piR-32846	hsa_piRNA_29225	DQ582734P	2.92881	0.98449	-1.19111	0.0076754	0.2433	1
449	piR-47827	hsa_piRNA_14244	DQ579715P	1.97045	0.66553	-1.19005	0.0067049	0.22816	1	LINC00905
456	piR-33753	hsa_piRNA_28318	DQ593641P	0.80768	0.24709	-1.18804	0.0068408	0.22921	1	RP11-586K12.11
228	piR-45848	hsa_piRNA_16223	DQ577736P	0.45506	0.19623	-1.18543	0.00185655	0.12441	1	CYP19A1
496	piR-47826	hsa_piRNA_14245	DQ579714P	2.62679	0.88039	-1.17987	0.0079571	0.24511	1	LINC00905
118	piR-50473	hsa_piRNA_11598	DQ583361P	0.33184	0.1497	-1.17858	0.00044268	0.05732	1
3	piR-43594	hsa_piRNA_18477	DQ575482P	1.81044	0.79934	-1.17682	3.0769e-07	0.00157	0.0047
282	piR-43311	hsa_piRNA_18760	DQ575199P	0.32148	0.12486	-1.16387	0.0029448	0.15955	1	TBC1D3P4,TBC1D3P3,RP11-434D2.3
545	piR-36202	hsa_piRNA_25869	DQ598136P	12.8919	4.28009	-1.15036	0.0098971	0.27746	1	RP3-468B3.2
380	piR-45346	hsa_piRNA_16725	DQ577234P	0.79536	0.27864	-1.14971	0.0049028	0.19713	1	LINC00905
201	piR-49114	hsa_piRNA_12957	DQ581002P	1.7057	0.73872	-1.14629	0.0014629	0.1112	1	LINC01016
512	piR-45240	hsa_piRNA_16831	DQ577128P	4.58355	1.48729	-1.13499	0.008644	0.25795	1	RP4-610C12.4,RP4-610C12.4
370	piR-56731	hsa_piRNA_5340	DQ589619P	0.19815	0.08253	-1.13209	0.0046754	0.19307	1
59	piR-31072	hsa_piRNA_30999	DQ570960P	1.21143	0.55056	-1.12461	9.7374e-05	0.02522	1	GOLGA6B,GOLGA6L5P,GOLGA2,GOLGA6L16P,RP11-24M17.5,RP11-361M10.3,GOLGA6A,GOLGA6L11P,RP11-114H24.2,GOLGA6L3,GOLGA6L10,GOLGA6L4,RP11-114H24.7,GOLGA2P8,GOLGA6D,GOLGA6C,RP11-697E2.12,RP11-299H22.3,GOLGA6L17P,AC068831.10,GOLGA6L9,RP11-1006G14.2,GOLGA6D
403	piR-38904	hsa_piRNA_23167	DQ600838P	4.15875	1.90628	-1.12314	0.0055979	0.21223	1	TTC5,TPRG1,MERTK,LINC00707,RP11-452K12.7,TTLL3,DNAJC15,CHODL,RP5-965G21.4,TBC1D23,REPS2,RRP12,RP11-234B24.6,LINC00707,ARL17B,GALNT8,RP11-1007I13.4,CLEC6A,PROM1,TMEM51-AS1
129	piR-61872	hsa_piRNA_199	DQ595760P	0.61457	0.27516	-1.11484	0.00055779	0.06607	1	LINC01517,LINC00837
112	piR-42654	hsa_piRNA_19417	DQ574542P	0.59393	0.28013	-1.11438	0.00041869	0.05712	1	RP11-361L15.5,CES4A
34	piR-43418	hsa_piRNA_18653	DQ575306P	1.2592	0.56797	-1.11165	4.4926e-05	0.02019	0.68642	LINC01016
487	piR-31719	hsa_piRNA_30352	DQ571607P	0.45763	0.18148	-1.10583	0.0078588	0.24656	1
46	piR-39773	hsa_piRNA_22298	DQ601707P	0.90353	0.42113	-1.09558	6.3181e-05	0.02099	0.96534
197	piR-57414	hsa_piRNA_4657	DQ590302P	0.32122	0.15012	-1.09178	0.00136464	0.10584	1	CHST1
225	piR-56521	hsa_piRNA_5550	DQ589409P	3.87173	1.71535	-1.0909	0.00178239	0.12104	1
356	piR-47513	hsa_piRNA_14558	DQ579401P	17.3726	7.79308	-1.08607	0.0043244	0.1856	1	RP11-157B13.8
389	piR-60249	hsa_piRNA_1822	DQ594137P	0.27981	0.12855	-1.08543	0.0052159	0.20487	1
98	piR-47595	hsa_piRNA_14476	DQ579483P	0.77837	0.36483	-1.07993	0.00024134	0.03763	1
412	piR-39272	hsa_piRNA_22799	DQ601206P	5.65144	2.14726	-1.07631	0.0058627	0.21742	1	RP11-1O10.1,RP11-299H22.3
263	piR-48688	hsa_piRNA_13383	DQ580576P	9.41939	4.20917	-1.07486	0.0025392	0.14751	1	TUBBP2,TUBB
371	piR-31757	hsa_piRNA_30314	DQ571645P	3.26879	1.50007	-1.0555	0.0046767	0.1926	1	PRMT8
268	piR-60132	hsa_piRNA_1939	DQ594020P	22.938	10.6997	-1.04757	0.0026182	0.14927	1	RP13-39P12.2
173	piR-48734	hsa_piRNA_13337	DQ580622P	0.38008	0.17554	-1.04671	0.00102005	0.09009	1	SORCS2,DHX30
421	piR-57501	hsa_piRNA_4570	DQ590389P	0.21961	0.0958	-1.04506	0.0060155	0.21832	1
17	piR-32551	hsa_piRNA_29520	DQ582439P	6.85678	3.35597	-1.03542	1.61119e-05	0.01448	0.24617	CTC-347C20.1
459	piR-50621	hsa_piRNA_11450	DQ583509P	1.36259	0.56913	-1.02519	0.0068817	0.22908	1	AC008132.13,POM121L9P,POM121L8P,POM121L4P,POM121L7,POM121L3P,POM121L4P,RP11-93O17.2,RP11-93O17.2,POM121L10P,FAM230B,FAM230B,RP11-346J10.3,RP11-93O17.2,AC008132.13
72	piR-31802	hsa_piRNA_30269	DQ571690P	1.05465	0.50588	-1.02396	0.000140338	0.02978	1
53	piR-31618	hsa_piRNA_30453	DQ571506P	47.1943	23.1783	-1.02196	8.0937e-05	0.02333	1
255	piR-57084	hsa_piRNA_4987	DQ589972P	2.10745	1.00987	-1.00306	0.0024227	0.14516	1
306	piR-37690	hsa_piRNA_24381	DQ599624P	0.71158	0.35694	-1.00142	0.0033351	0.16653	1	LINC00905
49	piR-36048	hsa_piRNA_26023	DQ597982P	1.91218	0.92616	-0.99827	7.6275e-05	0.02378	1	RP11-146D12.2,FAM95B1
67	piR-38133	hsa_piRNA_23938	DQ600067P	5.63144	2.82218	-0.99034	0.000124988	0.0285	1	SLC7A6OS,SLC7A6
363	piR-46485	hsa_piRNA_15586	DQ578373P	0.26072	0.12295	-0.98617	0.0044418	0.18696	1	FAM225B,FAM225A
354	piR-42428	hsa_piRNA_19643	DQ574316P	43.9582	19.0205	-0.98304	0.0043034	0.18574	1
399	piR-42425	hsa_piRNA_19646	DQ574313P	31.6464	13.716	-0.97193	0.0055389	0.2121	1	AC016757.3
243	piR-33370	hsa_piRNA_28701	DQ593258P	5.22706	2.72167	-0.9651	0.0022157	0.13932	1
75	piR-43981	hsa_piRNA_18090	DQ575869P	0.6017	0.30484	-0.96377	0.000143611	0.02926	1
107	piR-31597	hsa_piRNA_30474	DQ571485P	0.56769	0.28893	-0.94219	0.00036228	0.05173	1
151	piR-60050	hsa_piRNA_2021	DQ593938P	2.22011	1.12355	-0.93669	0.00075985	0.07689	1
393	piR-57599	hsa_piRNA_4472	DQ590487P	0.19542	0.09255	-0.93607	0.0053413	0.20766	1	CTC-523E23.4,CTC-523E23.1
357	piR-50599	hsa_piRNA_11472	DQ583487P	4.98885	2.5107	-0.92158	0.0043381	0.18566	1	RP3-468B3.2
463	piR-40868	hsa_piRNA_21203	DQ572756P	1.20208	0.5192	-0.91837	0.007065	0.23314	1
425	piR-41785	hsa_piRNA_20286	DQ573673P	0.30361	0.14798	-0.90768	0.0060779	0.2185	1	AC015849.15
88	piR-54224	hsa_piRNA_7847	DQ587112P	25.8855	13.7401	-0.90757	0.000198061	0.03439	1	FAR2P1
539	piR-34900	hsa_piRNA_27171	DQ596834P	0.2573	0.11987	-0.90641	0.0095817	0.27161	1	PDE10A
86	piR-30752	hsa_piRNA_31319	DQ570640P	2.85831	1.50774	-0.90554	0.000176609	0.03138	1	DSP
141	piR-44545	hsa_piRNA_17526	DQ576433P	1.42015	0.75734	-0.90182	0.0006384	0.06918	1
234	piR-38376	hsa_piRNA_23695	DQ600310P	63.8896	32.702	-0.90175	0.0020415	0.1333	1	YWHAG
211	piR-42295	hsa_piRNA_19776	DQ574183P	0.20783	0.11365	-0.90047	0.00162257	0.11749	1	THAP6
236	piR-50874	hsa_piRNA_11197	DQ583762P	4.40398	2.48635	-0.89816	0.0020619	0.13349	1	ZFP41,ZFP41
168	piR-33807	hsa_piRNA_28264	DQ593695P	0.41904	0.22598	-0.88852	0.00097889	0.08903	1	RP11-635L1.3,PALLD
174	piR-42624	hsa_piRNA_19447	DQ574512P	138.532	73.7088	-0.88674	0.00105657	0.09278	1	LINC00905
473	piR-47364	hsa_piRNA_14707	DQ579252P	1.12935	0.58623	-0.88494	0.0074182	0.23963	1	RP11-753D20.1
490	piR-45435	hsa_piRNA_16636	DQ577323P	0.38299	0.17654	-0.88414	0.0078804	0.24572	1
475	piR-53970	hsa_piRNA_8101	DQ586858P	0.28018	0.15001	-0.87425	0.0074968	0.24114	1	RIMS3
394	piR-41170	hsa_piRNA_20901	DQ573058P	1.24297	0.64591	-0.855	0.0053439	0.20723	1
215	piR-56914	hsa_piRNA_5157	DQ589802P	1.28913	0.7137	-0.85423	0.0016976	0.12064	1	RP11-522B15.6,RP11-161H23.5,RP11-522B15.3,TUBA1A,RP11-184J23.2,TUBA1B,RP11-386G11.10,RP11-346M5.1,CYP4Z2P,RP11-386G11.11,TUBA1C,CYP4Z1
485	piR-52028	hsa_piRNA_10043	DQ584916P	0.22394	0.11554	-0.85069	0.0077841	0.24522	1	GOLGA8F,GOLGA8G,GOLGA8EP,GOLGA8CP
405	piR-40791	hsa_piRNA_21280	DQ572679P	9.27268	4.98479	-0.84838	0.0056395	0.21276	1	RP13-39P12.2
541	piR-53714	hsa_piRNA_8357	DQ586602P	100.672	51.6286	-0.84481	0.0096551	0.27268	1	PSMB7
170	piR-35520	hsa_piRNA_26551	DQ597454P	3.92581	2.17821	-0.8425	0.00099915	0.0898	1	GOLGA8VP,DNM1P46,CTD-2054N24.1,DNM1P47
145	piR-51047	hsa_piRNA_11024	DQ583935P	55.7763	30.1504	-0.84184	0.00064473	0.06794	1
231	piR-44013	hsa_piRNA_18058	DQ575901P	0.21797	0.12335	-0.83568	0.00189742	0.1255	1	RP11-545A16.3
203	piR-39925	hsa_piRNA_22146	DQ601859P	2.85564	1.56848	-0.83389	0.00150194	0.11305	1
198	piR-44654	hsa_piRNA_17417	DQ576542P	57.5378	31.2666	-0.8325	0.00137769	0.10631	1
481	piR-53278	hsa_piRNA_8793	DQ586166P	0.34585	0.17837	-0.82268	0.0076414	0.24273	1	CANT1
502	piR-51074	hsa_piRNA_10997	DQ583962P	0.36216	0.20077	-0.82168	0.0082591	0.25138	1	CYP19A1
318	piR-42426	hsa_piRNA_19645	DQ574314P	44.8707	22.8895	-0.8207	0.0035443	0.17029	1	AC016757.3
247	piR-44653	hsa_piRNA_17418	DQ576541P	61.8491	34.1303	-0.80831	0.00224	0.13856	1
322	piR-42427	hsa_piRNA_19644	DQ574315P	57.1392	29.4332	-0.80771	0.0036418	0.1728	1
398	piR-32606	hsa_piRNA_29465	DQ582494P	11.2752	5.73667	-0.80085	0.005505	0.21133	1	CTSB
109	piR-52944	hsa_piRNA_9127	DQ585832P	1.35838	0.76768	-0.79944	0.00039982	0.05604	1	LINC00865,RP11-248C1.3
7	piR-57508	hsa_piRNA_4563	DQ590396P	2.20877	1.27694	-0.79861	1.1864e-06	0.00259	0.01813
6	piR-50124	hsa_piRNA_11947	DQ583012P	2.76507	1.59206	-0.79832	9.9776e-07	0.00254	0.01524	CAND2
113	piR-49108	hsa_piRNA_12963	DQ580996P	48.6805	27.3944	-0.79159	0.00041914	0.05667	1	GOLGA8O,GOLGA8CP,GOLGA8K,GOLGA8R,GOLGA8N,GOLGA8DP,DNM1P46,GOLGA8T,GOLGA8G,RP11-1000B6.8,GOLGA8Q,CTD-2054N24.1,GOLGA8H,GOLGA8J,GOLGA8F,GOLGA8M,GOLGA8UP,GOLGA8EP,GOLGA8S,GOLGA8I
82	piR-54761	hsa_piRNA_7310	DQ587649P	6.67962	3.84972	-0.79002	0.000158662	0.02956	1	ZNF395
420	piR-45800	hsa_piRNA_16271	DQ577688P	0.15104	0.08053	-0.77233	0.0060024	0.21836	1	RP11-753D20.1
262	piR-42966	hsa_piRNA_19105	DQ574854P	0.2146	0.11053	-0.76111	0.0025154	0.14669	1	NUTM2A,NUTM2HP,NUTM2G,NUTM2B,NUTM2E,NUTM2B-AS1,NUTM2F,NUTM2A-AS1,HIATL2,NUTM2D
205	piR-51256	hsa_piRNA_10815	DQ584144P	1.12844	0.64517	-0.76044	0.00152498	0.11366	1	TUBB
489	piR-51383	hsa_piRNA_10688	DQ584271P	2.45535	1.42714	-0.76007	0.0078755	0.24607	1	NPIPB9,NPIPB11,PDXDC2P,NPIPB3,RP11-419C5.2,RP11-231C14.4,NPIPB6,NPIPB4,NPIPB8,RP11-347C12.1,NPIPB5
251	piR-32962	hsa_piRNA_29109	DQ582850P	12.6641	7.53969	-0.75601	0.0023844	0.14514	1	SCAP
261	piR-36638	hsa_piRNA_25433	DQ598572P	5.34503	3.19355	-0.75394	0.0025029	0.14652	1
199	piR-42602	hsa_piRNA_19469	DQ574490P	33.3066	19.1089	-0.75353	0.00139767	0.10731	1	CCDC134
384	piR-59975	hsa_piRNA_2096	DQ592863P	0.71463	0.39068	-0.74493	0.0050566	0.2012	1	FAM225B,FAM225A
135	piR-35523	hsa_piRNA_26548	DQ597457P	3.88084	2.28817	-0.74424	0.0006162	0.06974	1	DNM1P47,GOLGA8VP,CTD-2054N24.1,DNM1P46
127	piR-44511	hsa_piRNA_17560	DQ576399P	14.7397	8.63079	-0.74008	0.00054036	0.06501	1	CTD-2054N24.1,DNM1P46,AC090825.1
142	piR-50893	hsa_piRNA_11178	DQ583781P	3.11574	1.84355	-0.73929	0.00063886	0.06874	1
78	piR-38467	hsa_piRNA_23604	DQ600401P	1.72962	1.03596	-0.73435	0.000156122	0.03058	1	LINC00964,RP11-1082L8.1
37	piR-34527	hsa_piRNA_27544	DQ596461P	2.22796	1.33191	-0.73205	5.811e-05	0.024	0.88786	TBC1D3P4,TBC1D3P3,RP11-434D2.3
180	piR-30448	hsa_piRNA_31623	DQ570336P	0.47395	0.27856	-0.72854	0.00109766	0.09317	1
192	piR-42869	hsa_piRNA_19202	DQ574757P	0.39421	0.2357	-0.72651	0.00129972	0.10343	1	DNM1P47
272	piR-32166	hsa_piRNA_29905	DQ582054P	0.87829	0.51592	-0.72583	0.002736	0.15369	1
513	piR-60027	hsa_piRNA_2044	DQ593915P	8.11659	4.54296	-0.724	0.0086446	0.25747	1	RP3-468B3.2
207	piR-30584	hsa_piRNA_31487	DQ570472P	23.5391	13.7806	-0.72	0.00157769	0.11645	1
240	piR-31644	hsa_piRNA_30427	DQ571532P	20.0523	12.0308	-0.71654	0.0021172	0.13479	1	RP11-299H22.3
505	piR-35764	hsa_piRNA_26307	DQ597698P	0.39179	0.23555	-0.7083	0.0083957	0.25402	1	CANT1
52	piR-55748	hsa_piRNA_6323	DQ588636P	3.50117	2.14539	-0.70427	8.0433e-05	0.02363	1
335	piR-32740	hsa_piRNA_29331	DQ582628P	0.32855	0.19394	-0.70192	0.003943	0.17984	1	CTC-523E23.4
250	piR-37589	hsa_piRNA_24482	DQ599523P	193.022	112.049	-0.70156	0.0023193	0.14175	1	SPATA31C1,SPATA31C2,SPATA31B1P
224	piR-31275	hsa_piRNA_30796	DQ571163P	3.13614	1.88223	-0.69946	0.00177889	0.12134	1	LINC00376
65	piR-31729	hsa_piRNA_30342	DQ571617P	2.10468	1.28321	-0.69637	0.000121536	0.02857	1	AP000350.10
364	piR-33592	hsa_piRNA_28479	DQ593480P	0.17089	0.10238	-0.69364	0.0044793	0.18802	1
5	piR-43072	hsa_piRNA_18999	DQ574960P	0.51765	0.32034	-0.69325	9.2276e-07	0.00282	0.0141	AC006552.1
378	piR-50780	hsa_piRNA_11291	DQ583668P	82.8798	46.9078	-0.68895	0.0048572	0.19633	1
64	piR-34659	hsa_piRNA_27412	DQ596593P	31.8836	19.8235	-0.68765	0.000116	0.02769	1	DDX6
301	piR-44613	hsa_piRNA_17458	DQ576501P	0.2604	0.1598	-0.68698	0.0032028	0.16258	1	RP11-386M24.3
438	piR-35165	hsa_piRNA_26906	DQ597099P	0.79901	0.47251	-0.68316	0.00632	0.22046	1
534	piR-47029	hsa_piRNA_15042	DQ578917P	41.2371	25.179	-0.68286	0.0094774	0.27117	1	LINC01120
29	piR-49057	hsa_piRNA_13014	DQ580945P	36.3352	22.4236	-0.68155	4.0901e-05	0.02155	0.62493
429	piR-36107	hsa_piRNA_25964	DQ598041P	5.89944	3.90996	-0.6781	0.0061441	0.21882	1	HIST1H4J,HIST1H4K
188	piR-56663	hsa_piRNA_5408	DQ589551P	0.17439	0.10691	-0.67762	0.00123862	0.10066	1	RP3-468B3.2,LINC01016
68	piR-56002	hsa_piRNA_6069	DQ588890P	10.7165	6.63038	-0.6766	0.000135405	0.03042	1
92	piR-34957	hsa_piRNA_27114	DQ596891P	9.67229	6.0187	-0.67521	0.00021645	0.03595	1	DNM1P46,CTD-2054N24.1
348	piR-30972	hsa_piRNA_31099	DQ570860P	0.56811	0.35383	-0.67373	0.0042043	0.18459	1	TDRG1
291	piR-42928	hsa_piRNA_19143	DQ574816P	1.67092	1.0029	-0.67111	0.0030416	0.1597	1
162	piR-33057	hsa_piRNA_29014	DQ592945P	1.04927	0.65709	-0.66395	0.00092366	0.08711	1	CIRBP
538	piR-33009	hsa_piRNA_29062	DQ582897P	0.84609	0.47629	-0.66087	0.0095595	0.27149	1	TBC1D3P3,TBC1D3P4
177	piR-30742	hsa_piRNA_31329	DQ570630P	35.4122	22.2167	-0.65118	0.0010755	0.09284	1
239	piR-30130	hsa_piRNA_31941	DQ570018P	6.2808	3.95939	-0.65093	0.0021043	0.13453	1	RP11-574E24.3,RP11-574E24.3,RP11-381O7.3
214	piR-31438	hsa_piRNA_30633	DQ571326P	0.56897	0.346	-0.65013	0.00168304	0.12016	1	DNM1P47,GOLGA8VP
30	piR-47315	hsa_piRNA_14756	DQ579203P	1.67723	1.06339	-0.64964	4.1316e-05	0.02104	0.63127	AP000350.10
130	piR-54050	hsa_piRNA_8021	DQ586938P	57.9565	36.6348	-0.64858	0.00055929	0.06573	1	NPAP1P6
319	piR-45500	hsa_piRNA_16571	DQ577388P	0.6654	0.40458	-0.64849	0.0035648	0.17074	1	MBNL2
97	piR-59033	hsa_piRNA_3038	DQ591921P	175.743	108.319	-0.6479	0.00024102	0.03796	1
87	piR-51018	hsa_piRNA_11053	DQ583906P	0.26192	0.17255	-0.6431	0.000178387	0.03133	1	CTC-513N18.6,PLA2G4A
273	piR-30305	hsa_piRNA_31766	DQ570193P	0.46604	0.29181	-0.64227	0.0027375	0.15321	1	RP11-944L7.4,ZKSCAN7,ZNF660,RP11-944L7.5,MPRIP
20	piR-31192	hsa_piRNA_30879	DQ571080P	442.013	282.442	-0.6393	1.7738e-05	0.01355	0.27102	LINC00964,RP11-1082L8.2
194	piR-49021	hsa_piRNA_13050	DQ580909P	116.721	72.7524	-0.63171	0.00133915	0.10547	1	LINC00937
181	piR-34741	hsa_piRNA_27330	DQ596675P	266.543	164.381	-0.63167	0.00115538	0.09753	1	RP1-63G5.5,ELFN2
499	piR-50147	hsa_piRNA_11924	DQ583035P	0.13428	0.07935	-0.6309	0.0081568	0.24976	1	CPLX2
422	piR-61841	hsa_piRNA_230	DQ595729P	0.61845	0.37698	-0.62913	0.0060396	0.21867	1	FAM225B,FAM225A
385	piR-41747	hsa_piRNA_20324	DQ573635P	0.27292	0.17356	-0.62869	0.0050641	0.20097	1	EIF5
267	piR-38400	hsa_piRNA_23671	DQ600334P	2.11956	1.33233	-0.62753	0.0026047	0.14905	1
79	piR-47685	hsa_piRNA_14386	DQ579573P	212.862	134.944	-0.62312	0.000156623	0.03029	1	AP000350.10
296	piR-44889	hsa_piRNA_17182	DQ576777P	1.04843	0.65288	-0.62231	0.0031384	0.162	1	CYP19A1
454	piR-43662	hsa_piRNA_18409	DQ575550P	1.15043	0.70095	-0.62177	0.0067821	0.22825	1	LINC01016
290	piR-35098	hsa_piRNA_26973	DQ597032P	22.7332	14.5665	-0.61777	0.0030218	0.15921	1
89	piR-46123	hsa_piRNA_15948	DQ578011P	2.15475	1.398	-0.61597	0.00020138	0.03457	1	PRAME
300	piR-39580	hsa_piRNA_22491	DQ601514P	0.3842	0.2545	-0.61463	0.003202	0.16308	1	CYP19A1
431	piR-55100	hsa_piRNA_6971	DQ587988P	0.24196	0.15423	-0.60777	0.0061764	0.21895	1	RP11-266O8.1,RP11-164C12.2
15	piR-54616	hsa_piRNA_7455	DQ587504P	13.0017	8.49701	-0.60726	4.7361e-06	0.00482	0.07236
147	piR-31087	hsa_piRNA_30984	DQ570975P	92.1791	59.1154	-0.60622	0.00070044	0.0728	1
153	piR-32926	hsa_piRNA_29145	DQ582814P	0.51184	0.33595	-0.60582	0.0007809	0.07798	1	AC093838.4,SMPD4
137	piR-32405	hsa_piRNA_29666	DQ582293P	80.3444	52.3647	-0.60244	0.00061767	0.06889	1	RP11-329B9.1
444	piR-37545	hsa_piRNA_24526	DQ599479P	94.7741	61.3991	-0.59713	0.0065395	0.22504	1	GOLGA2P11
71	piR-30373	hsa_piRNA_31698	DQ570261P	4.17556	2.73871	-0.59372	0.000136911	0.02946	1	LINC01016
525	piR-52687	hsa_piRNA_9384	DQ585575P	1.32737	0.90806	-0.59097	0.0090619	0.26373	1	NCR3LG1
39	piR-40712	hsa_piRNA_21359	DQ572600P	71.6441	47.311	-0.58614	6.1422e-05	0.02406	0.93847	LINC00930
503	piR-56298	hsa_piRNA_5773	DQ589186P	16.9697	11.1425	-0.56987	0.0083352	0.25319	1	SPATA8
155	piR-32333	hsa_piRNA_29738	DQ582221P	161.856	106.853	-0.56873	0.00080076	0.07893	1
102	piR-54566	hsa_piRNA_7505	DQ587454P	1.47815	0.9985	-0.56095	0.00029611	0.04436	1
408	piR-31023	hsa_piRNA_31048	DQ570911P	0.43355	0.28288	-0.55834	0.0057552	0.21552	1
28	piR-53391	hsa_piRNA_8680	DQ586279P	1.23512	0.84035	-0.55671	3.8783e-05	0.02116	0.59257	RP11-108K3.1,CYP19A1
61	piR-50824	hsa_piRNA_11247	DQ583712P	211.105	142.236	-0.55631	0.000101426	0.0254	1	RP11-1082L8.2,LINC00964
58	piR-41087	hsa_piRNA_20984	DQ572975P	4.47279	3.04876	-0.55377	9.6673e-05	0.02547	1
339	piR-33451	hsa_piRNA_28620	DQ593339P	2.41128	1.60911	-0.55362	0.00402	0.18118	1	CTD-2054N24.1,DNM1P46,DNM1P47,GOLGA8VP
144	piR-30766	hsa_piRNA_31305	DQ570654P	378.495	257.242	-0.54926	0.00064359	0.06829	1	LINC00905
303	piR-48004	hsa_piRNA_14067	DQ579892P	4.28695	2.85462	-0.54711	0.0032393	0.16334	1	CTD-2589H19.6,TPPP
432	piR-43174	hsa_piRNA_18897	DQ575062P	4.74574	3.15218	-0.54604	0.0061828	0.21867	1	LINC01016
171	piR-51516	hsa_piRNA_10555	DQ584404P	7.2913	4.98347	-0.53941	0.00100282	0.0896	1	AQP7P2,AQP7P1,AQP7P4,AQP7,AQP7P2
108	piR-61620	hsa_piRNA_451	DQ595508P	95.4977	63.6868	-0.53434	0.00039793	0.0563	1
139	piR-38436	hsa_piRNA_23635	DQ600370P	81.3064	55.2505	-0.53414	0.00062307	0.06849	1
213	piR-35521	hsa_piRNA_26550	DQ597455P	1.83289	1.25143	-0.53389	0.00166086	0.11914	1	CTD-2054N24.1,DNM1P46,DNM1P47,GOLGA8VP
206	piR-34169	hsa_piRNA_27902	DQ596103P	0.85098	0.58602	-0.53111	0.0015597	0.11568	1
32	piR-32033	hsa_piRNA_30038	DQ581921P	20.6217	14.2464	-0.52791	4.3208e-05	0.02063	0.66018	GOLGA8VP,DNM1P47
281	piR-56289	hsa_piRNA_5782	DQ589177P	0.95649	0.68486	-0.52387	0.002942	0.15997	1
190	piR-56008	hsa_piRNA_6063	DQ588896P	33.4697	23.3284	-0.52324	0.00126239	0.10152	1
386	piR-61619	hsa_piRNA_452	DQ595507P	183.642	118.445	-0.52242	0.0051229	0.20278	1	RP3-468B3.2
69	piR-30676	hsa_piRNA_31395	DQ570564P	31.1751	21.4348	-0.52128	0.000135491	0.03	1	RP5-1029F21.3,RP5-1029F21.3,RP5-1029F21.3,RP5-1029F21.3,RP5-1029F21.3,RP5-1029F21.3
244	piR-47884	hsa_piRNA_14187	DQ579772P	0.28654	0.19552	-0.5183	0.0022211	0.13908	1	RP11-426C22.5
149	piR-58447	hsa_piRNA_3624	DQ591335P	49.2651	34.5276	-0.51767	0.0007177	0.0736	1	RP11-108K3.1,CYP19A1
307	piR-56603	hsa_piRNA_5468	DQ589491P	0.57012	0.39384	-0.51233	0.003336	0.16603	1	LINC00964,RP11-1082L8.2
140	piR-58036	hsa_piRNA_4035	DQ590924P	204.113	140.825	-0.51076	0.00062324	0.06802	1
486	piR-31074	hsa_piRNA_30997	DQ570962P	9.59113	6.44345	-0.51043	0.0077995	0.2452	1
443	piR-45672	hsa_piRNA_16399	DQ577560P	4.21575	2.90637	-0.51015	0.0064437	0.22224	1
411	piR-52418	hsa_piRNA_9653	DQ585306P	45.5981	30.7527	-0.50691	0.0058413	0.21715	1	KIF1B
264	piR-59855	hsa_piRNA_2216	DQ592743P	4.15007	2.88688	-0.50381	0.0025778	0.14919	1
277	piR-55984	hsa_piRNA_6087	DQ588872P	280.157	185.743	-0.50299	0.0028246	0.1558	1	RP11-156P1.3,RP11-156P1.2,LRRC37A17P
280	piR-35148	hsa_piRNA_26923	DQ597082P	1.45102	0.99078	-0.49911	0.0029204	0.15936	1	LINC00964
22	piR-60815	hsa_piRNA_1256	DQ594703P	117.897	83.9637	-0.49743	2.1359e-05	0.01483	0.32634	IGF1R,RP11-654A16.3
349	piR-35890	hsa_piRNA_26181	DQ597824P	50.8568	35.632	-0.495	0.0042196	0.18473	1	RP3-468B3.2
537	piR-52496	hsa_piRNA_9575	DQ585384P	6.26495	4.30849	-0.49498	0.0094846	0.26986	1	POTEKP,POTEI,POTEE,POTEF,RP11-433A19.2,PLEKHB2,POTEJ
226	piR-30274	hsa_piRNA_31797	DQ570162P	35.2256	24.546	-0.49204	0.00180216	0.12184	1
312	piR-45069	hsa_piRNA_17002	DQ576957P	340.029	231.393	-0.49144	0.0034223	0.16759	1
148	piR-37073	hsa_piRNA_24998	DQ599007P	6.20026	4.41186	-0.4848	0.0007156	0.07388	1	NUTM2D,NUTM2HP,NUTM2E,NUTM2B-AS1,NUTM2A,NUTM2B,NUTM2A-AS1
223	piR-54788	hsa_piRNA_7283	DQ587676P	10.1567	7.27499	-0.48451	0.00176011	0.1206	1	FAM225B,FAM225A
77	piR-30757	hsa_piRNA_31314	DQ570645P	1.85514	1.33119	-0.48168	0.000143871	0.02855	1	ZNF660,RP11-45M22.3,RP11-944L7.4,MPRIP,RP11-944L7.5,ZKSCAN7
254	piR-30920	hsa_piRNA_31151	DQ570808P	72.8919	51.5583	-0.47807	0.0024049	0.14466	1	SPATA31D5P
530	piR-33872	hsa_piRNA_28199	DQ593760P	0.29945	0.21453	-0.47681	0.009341	0.26929	1	RP1-63G5.5
219	piR-38933	hsa_piRNA_23138	DQ600867P	50.3259	35.7136	-0.4733	0.00171643	0.11975	1
172	piR-39716	hsa_piRNA_22355	DQ601650P	2.21043	1.58302	-0.47284	0.00101918	0.09054	1	LINC01016
439	piR-40442	hsa_piRNA_21629	DQ572330P	8.00301	5.55205	-0.47113	0.0063379	0.22058	1
204	piR-56095	hsa_piRNA_5976	DQ588983P	12.4131	8.77438	-0.47071	0.00150469	0.1127	1	FAM225A,FAM225B
544	piR-36651	hsa_piRNA_25420	DQ598585P	11.3769	8.00049	-0.46825	0.0098433	0.27646	1
313	piR-38932	hsa_piRNA_23139	DQ600866P	59.2273	41.7596	-0.4664	0.003439	0.16787	1	NPAP1P6
48	piR-54780	hsa_piRNA_7291	DQ587668P	2.01376	1.45058	-0.46626	7.5821e-05	0.02413	1	RP11-146D12.2,RP11-146D12.2
27	piR-34284	hsa_piRNA_27787	DQ596218P	49.1514	35.9391	-0.45961	3.689e-05	0.02088	0.56364
358	piR-30834	hsa_piRNA_31237	DQ570722P	16.4908	11.8115	-0.45511	0.0043556	0.18589	1	RP11-386M24.9
196	piR-38931	hsa_piRNA_23140	DQ600865P	107.728	78.1162	-0.45495	0.00135857	0.10591	1	NPAP1P6
95	piR-42625	hsa_piRNA_19446	DQ574513P	15.5917	11.3948	-0.452	0.00023845	0.03835	1	CTB-180A7.3,RP11-308D16.2,SPATA5,OCLN,RP11-114H23.1,FIGNL1,ANKRD28,STAG1,FUCA1,EGLN3,GPR89B,HUS1,DDC,CEP44,AC004448.5,ERBB2IP
238	piR-49376	hsa_piRNA_12695	DQ581264P	40.0005	29.0894	-0.44902	0.0020994	0.13478	1	DNM1P47,GOLGA8VP
193	piR-57014	hsa_piRNA_5057	DQ589902P	1.25726	0.90601	-0.44431	0.00130259	0.10312	1	FAHD2CP,FAHD2A,FAHD2B
70	piR-45402	hsa_piRNA_16669	DQ577290P	35.6654	26.1794	-0.44364	0.00013568	0.02962	1	RELA
47	piR-56096	hsa_piRNA_5975	DQ588984P	25.1264	18.5568	-0.44136	6.3469e-05	0.02063	0.96974	FAM225B,FAM225A
392	piR-44440	hsa_piRNA_17631	DQ576328P	7.47983	5.27791	-0.4394	0.0053351	0.20795	1
298	piR-46835	hsa_piRNA_15236	DQ578723P	0.93212	0.71141	-0.4363	0.0031831	0.1632	1	RP11-834C11.6,RP11-157L3.12,RP11-374M1.4,FLJ12825,RP11-157L3.12,RP11-834C11.5
494	piR-44397	hsa_piRNA_17674	DQ576285P	0.41096	0.29993	-0.432	0.0079393	0.24556	1	TRIM66
66	piR-39223	hsa_piRNA_22848	DQ601157P	10.6088	7.86602	-0.43154	0.000123763	0.02865	1
222	piR-51953	hsa_piRNA_10118	DQ584841P	2.54821	1.88268	-0.42829	0.00173508	0.11942	1	HIST1H2BO,HIST1H2BH
237	piR-34339	hsa_piRNA_27732	DQ596273P	7.87363	5.84113	-0.42596	0.0020639	0.13306	1	RP11-438J1.1,TATDN2
276	piR-43355	hsa_piRNA_18716	DQ575243P	47.1555	34.0403	-0.42313	0.0027764	0.1537	1	BEND7
221	piR-43800	hsa_piRNA_18271	DQ575688P	0.95911	0.69231	-0.42263	0.00172483	0.11925	1	RP11-299H22.3
410	piR-59359	hsa_piRNA_2712	DQ592247P	0.79129	0.5834	-0.42194	0.0057788	0.21535	1
549	piR-53050	hsa_piRNA_9021	DQ585938P	3.72538	2.73158	-0.42118	0.0099964	0.27821	1	PLEKHB2
353	piR-53679	hsa_piRNA_8392	DQ586567P	20.0593	14.9271	-0.4203	0.0042986	0.18606	1
18	piR-39794	hsa_piRNA_22277	DQ601728P	245.764	183.188	-0.41988	1.6561e-05	0.01406	0.25304	ZNF701,CTD-3099C6.7
382	piR-31265	hsa_piRNA_30806	DQ571153P	1.77419	1.32809	-0.41666	0.0050171	0.20067	1	RP11-299H22.3
126	piR-52410	hsa_piRNA_9661	DQ585298P	7.45168	5.55472	-0.41598	0.00053773	0.06521	1
13	piR-56300	hsa_piRNA_5771	DQ589188P	1.33358	0.99901	-0.41594	3.4766e-06	0.00409	0.05312	RCC2,RP1-20B21.4
404	piR-36566	hsa_piRNA_25505	DQ598500P	83.4287	61.3507	-0.41525	0.0056034	0.21192	1	PDPK1
182	piR-38454	hsa_piRNA_23617	DQ600388P	2.99463	2.23136	-0.41482	0.00116059	0.09743	1
185	piR-33853	hsa_piRNA_28218	DQ593741P	17.0909	12.8264	-0.41472	0.00117963	0.09742	1	RP11-438J1.1,TATDN2
334	piR-37442	hsa_piRNA_24629	DQ599376P	0.71814	0.53722	-0.40956	0.0039428	0.18037	1	MARCH8
41	piR-40630	hsa_piRNA_21441	DQ572518P	4.19884	3.14632	-0.40943	6.2266e-05	0.0232	0.95136	ABLIM2
195	piR-33032	hsa_piRNA_29039	DQ592920P	2.22634	1.6669	-0.40843	0.00135768	0.10638	1	KIAA0226
200	piR-35166	hsa_piRNA_26905	DQ597100P	20.3365	15.3604	-0.39949	0.00141826	0.10835	1	C12orf43
169	piR-52677	hsa_piRNA_9394	DQ585565P	1.0991	0.83562	-0.39601	0.00099801	0.09023	1	RGAG4
329	piR-31663	hsa_piRNA_30408	DQ571551P	1.95061	1.48303	-0.394	0.0037805	0.17557	1	RP11-753D20.1
469	piR-40674	hsa_piRNA_21397	DQ572562P	116.705	87.6902	-0.39367	0.0072249	0.23537	1	DNM1P47,DNM1P46
110	piR-52735	hsa_piRNA_9336	DQ585623P	2.41823	1.841	-0.388	0.000402	0.05584	1	POTEM,POTEE,POTEH,POTEH,POTEH,POTEG,POTEF,PLEKHB2,POTEM,POTEG
191	piR-58944	hsa_piRNA_3127	DQ591832P	270.6	203.453	-0.3876	0.00128078	0.10246	1	DNM1P47,GOLGA8VP
426	piR-40267	hsa_piRNA_21804	DQ572155P	0.55113	0.40587	-0.38731	0.0060953	0.21862	1
235	piR-36722	hsa_piRNA_25349	DQ598656P	2.71448	2.05286	-0.38489	0.0020587	0.13385	1
80	piR-37349	hsa_piRNA_24722	DQ599283P	81.1889	62.2922	-0.38207	0.000157238	0.03003	1	CYP19A1
428	piR-57910	hsa_piRNA_4161	DQ590798P	355.518	268.974	-0.38084	0.0061438	0.21933	1	DNAJC5
119	piR-54955	hsa_piRNA_7116	DQ587843P	42.7558	32.7358	-0.37821	0.00047829	0.06141	1	RP3-468B3.2
305	piR-37995	hsa_piRNA_24076	DQ599929P	94.8951	72.1568	-0.37819	0.003296	0.16511	1	RAPGEF1
524	piR-34044	hsa_piRNA_28027	DQ595978P	8.87192	6.76441	-0.37812	0.0090603	0.26418	1	CYP20A1
533	piR-36665	hsa_piRNA_25406	DQ598599P	5.96885	4.49541	-0.37788	0.0094577	0.27111	1	RP3-468B3.2
461	piR-38256	hsa_piRNA_23815	DQ600190P	5.74115	4.32665	-0.37728	0.0070215	0.23271	1	PMM2,RP11-498P14.5,CNTNAP2,MIR99AHG,ANKRD18CP,CTD-2047H16.4,RP11-380P13.1,AC073071.1,ERVH-1
161	piR-34553	hsa_piRNA_27518	DQ596487P	87.0291	66.7094	-0.37618	0.0009205	0.08736	1	RP11-386M24.3
166	piR-56109	hsa_piRNA_5962	DQ588997P	2.52584	1.93166	-0.37603	0.00096106	0.08846	1
369	piR-58041	hsa_piRNA_4030	DQ590929P	532.87	410.921	-0.3748	0.0046628	0.19307	1
55	piR-35041	hsa_piRNA_27030	DQ596975P	176.08	135.357	-0.37141	8.3851e-05	0.02329	1	RP1-63G5.5
14	piR-55747	hsa_piRNA_6324	DQ588635P	2.1984	1.70058	-0.36918	4.3025e-06	0.0047	0.06574	LINC00905,LLNLF-136C3.1
106	piR-33531	hsa_piRNA_28540	DQ593419P	11.4285	8.84193	-0.36866	0.00035506	0.05118	1
458	piR-37854	hsa_piRNA_24217	DQ599788P	231.282	175.213	-0.36539	0.0068594	0.22883	1	DNM1P46,CTD-2054N24.1
33	piR-50886	hsa_piRNA_11185	DQ583774P	43.0168	33.5766	-0.36527	4.3719e-05	0.02024	0.66798	RP11-115J23.1,OTUD7A
253	piR-31809	hsa_piRNA_30262	DQ571697P	110.264	84.4892	-0.36085	0.0024049	0.14524	1	SLC7A1
345	piR-61363	hsa_piRNA_708	DQ595251P	6.59803	5.06755	-0.35984	0.004144	0.18353	1	HIST1H2BJ
229	piR-34398	hsa_piRNA_27673	DQ596332P	91.6643	70.5826	-0.35764	0.00185872	0.12401	1
359	piR-47921	hsa_piRNA_14150	DQ579809P	0.4561	0.35241	-0.35635	0.0043969	0.18713	1	SNRNP35
152	piR-48948	hsa_piRNA_13123	DQ580836P	45.6523	35.5943	-0.35283	0.00077906	0.07831	1	NPAP1P6
299	piR-55337	hsa_piRNA_6734	DQ588225P	2.60144	2.01129	-0.35263	0.0031962	0.16333	1	PRX
377	piR-45999	hsa_piRNA_16072	DQ577887P	0.37978	0.29612	-0.352	0.0048572	0.19685	1	RP3-468B3.2
91	piR-44498	hsa_piRNA_17573	DQ576386P	87.5321	68.5827	-0.351	0.00021565	0.03621	1
464	piR-41235	hsa_piRNA_20836	DQ573123P	188.177	148.516	-0.34886	0.0070783	0.23308	1
374	piR-30337	hsa_piRNA_31734	DQ570225P	2.29785	1.78677	-0.34798	0.0047351	0.19344	1
287	piR-43288	hsa_piRNA_18783	DQ575176P	64.3805	50.4559	-0.34733	0.0030025	0.15984	1
316	piR-59111	hsa_piRNA_2960	DQ591999P	471.677	372.179	-0.34448	0.0035201	0.1702	1
442	piR-34817	hsa_piRNA_27254	DQ596751P	4.03635	3.18013	-0.34326	0.0064154	0.22177	1
517	piR-37461	hsa_piRNA_24610	DQ599395P	57.0957	45.0564	-0.34049	0.0088787	0.26239	1	RP11-488C13.5,VASH1
437	piR-47094	hsa_piRNA_14977	DQ578982P	53.2422	41.4493	-0.33344	0.0063183	0.22091	1	NUTM2B-AS1,BEND3P3,BEND3P3
446	piR-44809	hsa_piRNA_17262	DQ576697P	173.27	133.477	-0.33277	0.0065603	0.22474	1	MGC45800
256	piR-53171	hsa_piRNA_8900	DQ586059P	121.57	94.9509	-0.3326	0.0024372	0.14546	1	CTD-2298J14.2,ADAM18,CHST11,TEX9
540	piR-37472	hsa_piRNA_24599	DQ599406P	1.36474	1.08097	-0.33102	0.0096356	0.27263	1	CUL3,PRUNE2,PLA2G4C,SYNE3,RFX3,RP11-946L20.4,AC007040.11,CAND2
435	piR-40122	hsa_piRNA_21949	DQ572010P	0.2688	0.21273	-0.32859	0.0062439	0.21931	1	GRIN2A
44	piR-42608	hsa_piRNA_19463	DQ574496P	1.54535	1.22211	-0.32819	6.2873e-05	0.02183	0.96064	LINC00882,RP11-52L11.7
265	piR-57591	hsa_piRNA_4480	DQ590479P	0.61889	0.48327	-0.32597	0.0025795	0.14873	1	RP1-63G5.5
259	piR-31203	hsa_piRNA_30868	DQ571091P	386.528	306.505	-0.3248	0.0024761	0.14607	1	CACNA1C
501	piR-57649	hsa_piRNA_4422	DQ590537P	6.84809	5.41717	-0.32353	0.008235	0.25114	1	RP13-580B18.4,AC005077.12
510	piR-32427	hsa_piRNA_29644	DQ582315P	2.27307	1.82153	-0.32223	0.0085817	0.2571	1
402	piR-50743	hsa_piRNA_11328	DQ583631P	0.59847	0.47661	-0.32004	0.0055837	0.21222	1	PIK3IP1
241	piR-54751	hsa_piRNA_7320	DQ587639P	97.0205	77.0055	-0.31883	0.0021427	0.13584	1	NUTM2E,NUTM2D,NUTM2A,NUTM2HP,NUTM2B-AS1,NUTM2B,NUTM2A-AS1
466	piR-38122	hsa_piRNA_23949	DQ600056P	79.6283	63.7792	-0.31857	0.0071404	0.23412	1	TMEM219
324	piR-36009	hsa_piRNA_26062	DQ597943P	40.9194	32.308	-0.31604	0.0036614	0.17266	1	RP11-753D20.1
220	piR-50446	hsa_piRNA_11625	DQ583334P	2.32562	1.87421	-0.31476	0.00171753	0.11928	1	HIST1H2AC
483	piR-47554	hsa_piRNA_14517	DQ579442P	1.22975	0.99042	-0.31042	0.0077159	0.24408	1
372	piR-57366	hsa_piRNA_4705	DQ590254P	38.4894	31.0182	-0.30947	0.0046791	0.19218	1
175	piR-55601	hsa_piRNA_6470	DQ588489P	1285.19	1031.61	-0.3082	0.00105767	0.09234	1
450	piR-59112	hsa_piRNA_2959	DQ592000P	600.469	485.301	-0.30818	0.006715	0.228	1
248	piR-46163	hsa_piRNA_15908	DQ578051P	7.449	5.9833	-0.30533	0.0022631	0.13943	1	CYP19A1,RP11-108K3.1
341	piR-37853	hsa_piRNA_24218	DQ599787P	168.594	136.994	-0.30449	0.0041362	0.18533	1
379	piR-35354	hsa_piRNA_26717	DQ597288P	110.576	88.9309	-0.30176	0.0048992	0.19751	1
124	piR-43359	hsa_piRNA_18712	DQ575247P	16.1841	13.1332	-0.30153	0.00052163	0.06427	1
522	piR-44497	hsa_piRNA_17574	DQ576385P	41.5091	33.564	-0.30049	0.0090215	0.26406	1	CTC-559E9.12
423	piR-32332	hsa_piRNA_29739	DQ582220P	7.32716	5.89846	-0.29998	0.0060403	0.21818	1	FAM225B,FAM225A
434	piR-47189	hsa_piRNA_14882	DQ579077P	7.46464	5.99486	-0.29917	0.0062424	0.21976	1	FAF2
159	piR-35011	hsa_piRNA_27060	DQ596945P	19.3539	15.5239	-0.29712	0.0008838	0.08493	1	USH2A,LINC-ROR,ZNF90
548	piR-41245	hsa_piRNA_20826	DQ573133P	4.55854	3.61025	-0.29522	0.0099438	0.27725	1	RP11-371F15.3,MT1A,PCDH11Y,SPG20,TIMM50,ABHD12B,RP11-181K12.2,HMCN1,PYGL,FOXN3,IGF2BP2,TMC7,CLEC12A,IFIT3,TULP4,PCDH11Y,RP11-238K6.1,DPH6,RP11-337C18.10,ITGB3BP,RP11-110G21.1,LSAMP,C6orf99,RP11-815M8.1,GNGT1,PKHD1,MED15,RP11-33N16.3,DAB1,FMO5,RP1-41C23.1,RYR2,RP11-297M9.1,LIPA,HPGDS,MGC32805,RP11-1096G20.5,RP1-167G20.1,CAV2,USH2A,LINC00376,MAGI2,RP11-732M18.4,LINC00964,RP11-380P13.1,RP1-167G20.1,…
508	piR-57210	hsa_piRNA_4861	DQ590098P	0.82434	0.67508	-0.2946	0.0085354	0.25672	1	WNT2B,ST7L
440	piR-34827	hsa_piRNA_27244	DQ596761P	18.1493	14.7449	-0.29416	0.0063849	0.22172	1
529	piR-55783	hsa_piRNA_6288	DQ588671P	115.009	92.1834	-0.29299	0.0092818	0.26808	1	APOBR
500	piR-31358	hsa_piRNA_30713	DQ571246P	8.1151	6.5839	-0.29209	0.0081822	0.25003	1	LINC01015
90	piR-51478	hsa_piRNA_10593	DQ584366P	7.47859	6.07936	-0.29169	0.00020367	0.03458	1	GNAL
292	piR-42811	hsa_piRNA_19260	DQ574699P	27.1777	21.9564	-0.29156	0.0030578	0.16	1	RIN3
178	piR-44496	hsa_piRNA_17575	DQ576384P	103.955	85.0691	-0.28992	0.00107776	0.09251	1	CTC-559E9.12
331	piR-48513	hsa_piRNA_13558	DQ580401P	3.94237	3.21436	-0.2898	0.0038175	0.17622	1
85	piR-47173	hsa_piRNA_14898	DQ579061P	543.259	443.53	-0.28852	0.000175791	0.0316	1	AC097374.2,TEKT4
76	piR-36460	hsa_piRNA_25611	DQ598394P	108.276	88.495	-0.28826	0.000143737	0.0289	1	EVPLL,RP1-37N7.1
519	piR-52467	hsa_piRNA_9604	DQ585355P	0.34528	0.28246	-0.28744	0.0088996	0.262	1
409	piR-59509	hsa_piRNA_2562	DQ592397P	88.7325	73.1916	-0.28692	0.005775	0.21574	1
333	piR-60394	hsa_piRNA_1677	DQ594282P	16.0135	13.0319	-0.28575	0.0039202	0.17987	1	RP1-63G5.5
165	piR-34400	hsa_piRNA_27671	DQ596334P	127.546	104.142	-0.28423	0.00095942	0.08884	1
323	piR-39560	hsa_piRNA_22511	DQ601494P	1.562	1.272	-0.28215	0.0036439	0.17237	1
252	piR-50394	hsa_piRNA_11677	DQ583282P	21.4764	17.5717	-0.27625	0.0023849	0.1446	1
202	piR-61023	hsa_piRNA_1048	DQ594911P	18.9886	15.709	-0.27588	0.0014636	0.1107	1
406	piR-37855	hsa_piRNA_24216	DQ599789P	379.923	314.808	-0.26846	0.0057351	0.21583	1	DNM1P46,CTD-2054N24.1
338	piR-49293	hsa_piRNA_12778	DQ581181P	193.567	160.796	-0.26361	0.0040195	0.1817	1	RP11-1415C14.2,RP11-497H16.5,RP11-589F5.4,RP11-98J23.1,GUSBP1,RP11-497H16.6,RP11-1198D22.3,RP11-589F5.3,RP11-823P9.3,RP11-98J23.2,RP11-1415C14.3,RP11-1198D22.2,RP11-1415C14.1,GUSBP3,RP11-848G14.5,RP11-1198D22.1,RP11-974F13.5,RP11-497H16.2,RP11-497H16.4
150	piR-50715	hsa_piRNA_11356	DQ583603P	2.42248	2.00975	-0.26341	0.00072241	0.07358	1
368	piR-56417	hsa_piRNA_5654	DQ589305P	0.34048	0.28222	-0.26286	0.0046448	0.19285	1	CTD-2054N24.1,DNM1P46
227	piR-31272	hsa_piRNA_30799	DQ571160P	162.073	134.449	-0.26124	0.00182426	0.12279	1	RP11-297P16.3,RP5-1139I1.1,RP11-61L23.2,CCR3,RP11-297M9.1,RP11-297P16.4,IL34
375	piR-50354	hsa_piRNA_11717	DQ583242P	5.92556	4.9432	-0.25881	0.004799	0.19553	1
278	piR-31156	hsa_piRNA_30915	DQ571044P	2.0307	1.69169	-0.25836	0.0028783	0.15819	1	BSN
122	piR-61954	hsa_piRNA_117	DQ595842P	22.9705	19.2882	-0.2552	0.00051825	0.0649	1	CYP19A1
342	piR-39360	hsa_piRNA_22711	DQ601294P	8.25698	6.87973	-0.25514	0.0041395	0.18493	1	LINC00905
391	piR-42531	hsa_piRNA_19540	DQ574419P	0.59263	0.50095	-0.25347	0.0053222	0.20797	1	AC114730.8,D2HGDH
367	piR-61384	hsa_piRNA_687	DQ595272P	26.0507	21.8384	-0.25011	0.0046439	0.19334	1	ILF3-AS1
328	piR-33692	hsa_piRNA_28379	DQ593580P	5.22685	4.35604	-0.25007	0.0037769	0.17594	1	DNM1P47,DNM1P46,CTD-2054N24.1,GOLGA8VP
479	piR-60986	hsa_piRNA_1085	DQ594874P	71.359	59.9204	-0.24599	0.00758	0.24178	1
217	piR-45516	hsa_piRNA_16555	DQ577404P	6.61515	5.55643	-0.24355	0.00169794	0.11955	1
355	piR-35979	hsa_piRNA_26092	DQ597913P	192.368	162.284	-0.24152	0.0043159	0.18575	1	CTC-523E23.4
532	piR-32809	hsa_piRNA_29262	DQ582697P	7.40093	6.23919	-0.24051	0.0093769	0.2693	1	LINC00930
311	piR-31539	hsa_piRNA_30532	DQ571427P	6.82659	5.7836	-0.23985	0.0034215	0.16809	1	CAND2
275	piR-30436	hsa_piRNA_31635	DQ570324P	22.3093	18.8587	-0.23525	0.0027594	0.15331	1	CTC-523E23.6
424	piR-38591	hsa_piRNA_23480	DQ600525P	1249.29	1053.56	-0.23316	0.0060593	0.21835	1
480	piR-54515	hsa_piRNA_7556	DQ587403P	2.65872	2.2539	-0.23207	0.0076047	0.24207	1
336	piR-61883	hsa_piRNA_188	DQ595771P	2.6531	2.25638	-0.22915	0.0040035	0.18205	1	CANT1
484	piR-56042	hsa_piRNA_6029	DQ588930P	0.74358	0.64185	-0.22732	0.0077837	0.24572	1	PRMT8
452	piR-41937	hsa_piRNA_20134	DQ573825P	1.51415	1.29059	-0.22009	0.0067358	0.22769	1	RPL23AP53
433	piR-53897	hsa_piRNA_8174	DQ586785P	1.24044	1.06361	-0.21833	0.0062194	0.21946	1	TMEM181,TMEM181,TATDN2P2,TATDN2P2
271	piR-53920	hsa_piRNA_8151	DQ586808P	96.1376	81.9888	-0.21726	0.002662	0.15008	1	CSPG4P8,GOLGA2P7,GOLGA2P10,CSPG4P12
343	piR-53712	hsa_piRNA_8359	DQ586600P	5.10782	4.38989	-0.21152	0.0041396	0.1844	1	CYP19A1,RP11-108K3.1
285	piR-31398	hsa_piRNA_30673	DQ571286P	24.8603	21.4263	-0.20971	0.0029751	0.1595	1
430	piR-38063	hsa_piRNA_24008	DQ599997P	2.13666	1.85462	-0.207	0.0061568	0.21877	1
467	piR-46299	hsa_piRNA_15772	DQ578187P	199.911	172.718	-0.20686	0.0071604	0.23427	1	LINC00905,LLNLF-136C3.1
362	piR-49362	hsa_piRNA_12709	DQ581250P	0.36217	0.3155	-0.20465	0.00442	0.18656	1	FLJ36000
125	piR-55744	hsa_piRNA_6327	DQ588632P	313.543	270.524	-0.20449	0.00053565	0.06547	1	FAM225B,FAM225A
54	piR-46783	hsa_piRNA_15288	DQ578671P	15.8335	13.7495	-0.20305	8.236e-05	0.0233	1	VPS37B
542	piR-43672	hsa_piRNA_18399	DQ575560P	3.68047	3.198	-0.19729	0.0097446	0.2747	1	NPAP1P6
520	piR-47186	hsa_piRNA_14885	DQ579074P	1246.6	1084.26	-0.19448	0.0089217	0.26214	1
327	piR-32770	hsa_piRNA_29301	DQ582658P	161.338	139.994	-0.194	0.0037428	0.17488	1	SFXN5,RAB11FIP5
143	piR-61773	hsa_piRNA_298	DQ595661P	24.7163	21.7299	-0.19021	0.00064354	0.06876	1	DNM1P47,DNM1P47,DNM1P47,DNM1P47,DNM1P47,DNM1P47,DNM1P47,DNM1P47,DNM1P47,DNM1P47,DNM1P47,DNM1P47,DNM1P47,DNM1P47,DNM1P47,DNM1P47,DNM1P47,DNM1P47
164	piR-58982	hsa_piRNA_3089	DQ591870P	143.572	125.751	-0.1885	0.00095709	0.08917	1
457	piR-48827	hsa_piRNA_13244	DQ580715P	0.35058	0.30702	-0.18721	0.0068442	0.22882	1	RP3-468B3.2
390	piR-49026	hsa_piRNA_13045	DQ580914P	3.0407	2.6706	-0.18231	0.0052586	0.20602	1	RP3-468B3.2
128	piR-44593	hsa_piRNA_17478	DQ576481P	6.50402	5.74345	-0.18151	0.00055673	0.06646	1	FGD4
493	piR-54262	hsa_piRNA_7809	DQ587150P	7.98183	7.02157	-0.18108	0.0079204	0.24547	1
462	piR-30283	hsa_piRNA_31788	DQ570171P	4.98752	4.38267	-0.1793	0.0070626	0.23357	1
511	piR-41470	hsa_piRNA_20601	DQ573358P	18.5171	16.114	-0.17075	0.0086379	0.25827	1	CTB-134H23.3,RP11-57A19.4,RP11-57A19.4
526	piR-36596	hsa_piRNA_25475	DQ598530P	2.07653	1.84194	-0.16913	0.0091047	0.26447	1	RP11-299H22.3
245	piR-43500	hsa_piRNA_18571	DQ575388P	9.36849	8.37546	-0.1601	0.0022237	0.13868	1
326	piR-40638	hsa_piRNA_21433	DQ572526P	0.86148	0.77304	-0.15649	0.00374	0.17529	1
242	piR-40848	hsa_piRNA_21223	DQ572736P	3.95833	3.56219	-0.1532	0.0021955	0.13862	1
330	piR-53978	hsa_piRNA_8093	DQ586866P	2.63331	2.36494	-0.15138	0.0038018	0.17602	1	DNM1P46,CTD-2054N24.1,DNM1P47,GOLGA8VP
103	piR-38559	hsa_piRNA_23512	DQ600493P	1.43899	1.30159	-0.14487	0.00032427	0.0481	1
320	piR-30535	hsa_piRNA_31536	DQ570423P	6.74163	6.11501	-0.13824	0.0035832	0.17109	1	RP3-468B3.2
506	piR-41438	hsa_piRNA_20633	DQ573326P	5.5966	5.11155	-0.12822	0.0085047	0.2568	1
183	piR-51465	hsa_piRNA_10606	DQ584353P	1.99482	1.82292	-0.12762	0.00116327	0.09712	1
295	piR-44959	hsa_piRNA_17112	DQ576847P	2.51562	2.30708	-0.12593	0.0031365	0.16245	1
417	piR-49916	hsa_piRNA_12155	DQ581804P	2.42986	2.25894	-0.10929	0.0059835	0.21924	1	TSTD2
451	piR-60281	hsa_piRNA_1790	DQ594169P	0.93106	1.00862	0.11401	0.0067164	0.22754	1
515	piR-45369	hsa_piRNA_16702	DQ577257P	1.026	1.13749	0.14313	0.0087389	0.25927	1
158	piR-33674	hsa_piRNA_28397	DQ593562P	2.17029	2.40225	0.14586	0.00086131	0.08329	1	NUTM2B-AS1,NUTM2A,NUTM2B,NUTM2A-AS1,NUTM2D,NUTM2E
495	piR-48530	hsa_piRNA_13541	DQ580418P	2.9099	3.28819	0.17112	0.0079395	0.24507	1
246	piR-56127	hsa_piRNA_5944	DQ589015P	0.40117	0.45195	0.17282	0.002224	0.13813	1	CTC-523E23.4
360	piR-34133	hsa_piRNA_27938	DQ596067P	0.29559	0.33444	0.18158	0.0044017	0.18682	1	NR2C2
471	piR-31981	hsa_piRNA_30090	DQ571869P	0.43058	0.49638	0.18888	0.0072761	0.23603	1	CTC-559E9.9
477	piR-46562	hsa_piRNA_15509	DQ578450P	1.30506	1.45972	0.19493	0.0075441	0.24165	1
96	piR-61035	hsa_piRNA_1036	DQ594923P	0.49723	0.56742	0.19528	0.00024098	0.03835	1
488	piR-30375	hsa_piRNA_31696	DQ570263P	0.40539	0.47181	0.1962	0.007865	0.24625	1	CTDSP2
397	piR-36263	hsa_piRNA_25808	DQ598197P	2.49912	2.86424	0.19967	0.0054826	0.211	1	CYP19A1,MGAT4C,ZNF626,RP11-108K3.1,PTPRT
297	piR-53853	hsa_piRNA_8218	DQ586741P	10.361	12.0091	0.21594	0.0031617	0.16265	1	EEF1A1P12,EEF1A1P6,EEF1A1P4,STEAP1B,EEF1A1,EEF1A1P19,EEF1A1P5,AEBP2,RP11-159F24.3,EEF1A1P10,C5orf34,TPK1
163	piR-31082	hsa_piRNA_30989	DQ570970P	0.49274	0.58074	0.23092	0.00094044	0.08815	1
138	piR-36412	hsa_piRNA_25659	DQ598346P	0.9789	1.14556	0.23395	0.00061822	0.06845	1	CTC-559E9.9
230	piR-55139	hsa_piRNA_6932	DQ588027P	1.11848	1.32194	0.24627	0.00185903	0.1235	1
258	piR-49128	hsa_piRNA_12943	DQ581016P	1.23172	1.45564	0.24635	0.002461	0.14574	1	RRP8
308	piR-37786	hsa_piRNA_24285	DQ599720P	1.43976	1.70507	0.24658	0.0033385	0.16561	1	CTC-559E9.9
387	piR-36752	hsa_piRNA_25319	DQ598686P	1.15753	1.39318	0.2533	0.0051363	0.20278	1	TBC1D32,GRM8
310	piR-41258	hsa_piRNA_20813	DQ573146P	10.4474	12.4568	0.2569	0.0033616	0.16568	1	MRPS25,NR2C2
419	piR-61663	hsa_piRNA_408	DQ595551P	0.51414	0.60851	0.25971	0.0060015	0.21885	1
347	piR-50682	hsa_piRNA_11389	DQ583570P	0.24693	0.29762	0.26614	0.0042034	0.18508	1	HIST1H2BA
497	piR-36189	hsa_piRNA_25882	DQ598123P	0.76024	0.9081	0.26685	0.0080186	0.24651	1
279	piR-40737	hsa_piRNA_21334	DQ572625P	0.47393	0.56732	0.27076	0.0029202	0.15992	1	LRRC59
337	piR-36200	hsa_piRNA_25871	DQ598134P	0.14105	0.17177	0.27293	0.0040162	0.18209	1
115	piR-36475	hsa_piRNA_25596	DQ598409P	5.01526	6.10045	0.27697	0.00042336	0.05625	1	RP11-57C13.3,DAB1,ANK2,RP11-80I15.1,AC073072.7,RP11-57C13.5,RP11-57C13.6,PTPRD,GGACT,RPS26P13,RPS26P15,RPS26,RP11-151A6.4,FANCC,RP11-330L19.1,RPS26P3,RPS26P47,AC074121.4,ZNF609,RP11-288G3.3,AC004057.1
365	piR-50163	hsa_piRNA_11908	DQ583051P	0.18209	0.2176	0.27954	0.0045769	0.19159	1	SRGAP2,SRGAP2-AS1,SRGAP2C,SRGAP2D
304	piR-46966	hsa_piRNA_15105	DQ578854P	0.16044	0.19216	0.28096	0.0032433	0.16301	1
23	piR-46156	hsa_piRNA_15915	DQ578044P	1.93525	2.35207	0.2816	2.3172e-05	0.01539	0.35404	RP3-468B3.2
233	piR-39137	hsa_piRNA_22934	DQ601071P	0.58159	0.70998	0.28878	0.0020191	0.1324	1	LINC01016
321	piR-33665	hsa_piRNA_28406	DQ593553P	0.7694	0.94274	0.29639	0.0036399	0.17325	1	POM121L7,POM121L1P,POM121L1P,POM121L4P,FAM230B,POM121L9P,POM121L10P,POM121L9P,FAM230B,POM121L8P,POM121L7
492	piR-44171	hsa_piRNA_17900	DQ576059P	0.21187	0.26026	0.29871	0.0079177	0.24588	1	NBPF1
131	piR-50974	hsa_piRNA_11097	DQ583862P	0.27825	0.34583	0.30196	0.00058042	0.0677	1	FAM225B
528	piR-56184	hsa_piRNA_5887	DQ589072P	0.86572	1.06623	0.30592	0.009121	0.26394	1	RP3-468B3.2
518	piR-35443	hsa_piRNA_26628	DQ597377P	0.5177	0.63865	0.32049	0.0088976	0.26244	1	CYP19A1,RP11-108K3.1
1	piR-46889	hsa_piRNA_15182	DQ578777P	0.25361	0.3177	0.32513	4.2608e-08	0.00065	0.00065
189	piR-58918	hsa_piRNA_3153	DQ591806P	0.56442	0.7026	0.32694	0.00123863	0.10013	1
401	piR-43432	hsa_piRNA_18639	DQ575320P	0.80153	0.99204	0.32699	0.0055779	0.21253	1	RP11-386M24.3
35	piR-42030	hsa_piRNA_20041	DQ573918P	1.70711	2.14828	0.33319	4.4971e-05	0.01963	0.68711	LHX4,LHX4-AS1
383	piR-36113	hsa_piRNA_25958	DQ598047P	0.22901	0.28688	0.34039	0.0050388	0.20101	1	RP11-266O8.1
407	piR-50111	hsa_piRNA_11960	DQ582999P	0.27889	0.35341	0.34229	0.0057425	0.21558	1
470	piR-30498	hsa_piRNA_31573	DQ570386P	0.17831	0.22567	0.34347	0.0072355	0.23522	1	LINC00905
302	piR-52214	hsa_piRNA_9857	DQ585102P	0.36457	0.45533	0.34694	0.0032218	0.163	1	RP11-108K3.1,CYP19A1
395	piR-40952	hsa_piRNA_21119	DQ572840P	1.17702	1.49478	0.35933	0.005344	0.20671	1
283	piR-52542	hsa_piRNA_9529	DQ585430P	1.08291	1.38064	0.35956	0.0029617	0.1599	1	PARK7
146	piR-47380	hsa_piRNA_14691	DQ579268P	1.10559	1.40434	0.36703	0.00066023	0.06909	1
184	piR-45448	hsa_piRNA_16623	DQ577336P	0.60761	0.77664	0.36743	0.00117562	0.09762	1	LRRC59
157	piR-54192	hsa_piRNA_7879	DQ587080P	0.40757	0.52246	0.36824	0.00086112	0.0838	1	GOLGA8VP,DNM1P47,RN7SL209P
216	piR-57481	hsa_piRNA_4590	DQ590369P	0.23732	0.30391	0.37848	0.00169781	0.1201	1
340	piR-40949	hsa_piRNA_21122	DQ572837P	1.02028	1.31801	0.38096	0.0040233	0.1808	1
100	piR-49552	hsa_piRNA_12519	DQ581440P	1.37645	1.78781	0.38238	0.00027662	0.04226	1
293	piR-43287	hsa_piRNA_18784	DQ575175P	0.47766	0.62271	0.38922	0.0030767	0.16044	1	LINC01016
491	piR-44705	hsa_piRNA_17366	DQ576593P	0.23438	0.30928	0.38923	0.0078984	0.24578	1	TBC1D3P3,USP6,TBC1D3P4
315	piR-30628	hsa_piRNA_31443	DQ570516P	1.01306	1.30861	0.39885	0.0034759	0.1686	1	ZDHHC4,AC079742.4
120	piR-48527	hsa_piRNA_13544	DQ580415P	0.77997	1.03057	0.40253	0.00050212	0.06393	1
436	piR-59296	hsa_piRNA_2775	DQ592184P	0.6329	0.8442	0.41585	0.0062643	0.21952	1	RP11-753D20.1
50	piR-47140	hsa_piRNA_14931	DQ579028P	0.32554	0.43121	0.41607	7.8238e-05	0.02391	1	LRRC59
132	piR-43433	hsa_piRNA_18638	DQ575321P	0.5031	0.67136	0.41856	0.0005956	0.06894	1	RP11-386M24.3
521	piR-48220	hsa_piRNA_13851	DQ580108P	3.32659	4.3061	0.42171	0.0089756	0.26322	1
309	piR-48528	hsa_piRNA_13543	DQ580416P	0.21274	0.28029	0.42736	0.003358	0.16604	1	ZNF214
543	piR-55105	hsa_piRNA_6966	DQ587993P	0.32615	0.42283	0.42783	0.0098153	0.27618	1	SPATA8-AS1
156	piR-31131	hsa_piRNA_30940	DQ571019P	0.45165	0.61939	0.44261	0.00082079	0.08039	1
507	piR-39494	hsa_piRNA_22577	DQ601428P	1.9014	2.5784	0.45182	0.0085234	0.25686	1	LINC00905
366	piR-55137	hsa_piRNA_6934	DQ588025P	0.18467	0.25203	0.45903	0.0046007	0.19206	1
288	piR-34698	hsa_piRNA_27373	DQ596632P	0.77537	1.04682	0.46067	0.0030188	0.16015	1
535	piR-43366	hsa_piRNA_18705	DQ575254P	0.19724	0.27018	0.46345	0.0094778	0.27068	1	LINC00905
210	piR-48056	hsa_piRNA_14015	DQ579944P	1.2301	1.67436	0.47502	0.00161814	0.11773	1	AC007566.10,GATAD1
441	piR-41392	hsa_piRNA_20679	DQ573280P	0.53271	0.7287	0.48423	0.0063992	0.22171	1	RP1-167G20.1
212	piR-30846	hsa_piRNA_31225	DQ570734P	0.64612	0.89498	0.48693	0.00164441	0.11851	1	PIGG
514	piR-50722	hsa_piRNA_11349	DQ583610P	0.39947	0.55266	0.49045	0.0086997	0.2586	1	RP11-146D12.2,RP11-146D12.2,ANKRD18A,PLEKHB2,PLEKHB2,ANKRD18A,PLEKHB2,bP-21264C1.2,ANKRD18A,PLEKHB2,PLEKHB2,PLEKHB2,FAR2P1,PLEKHB2,LINC01297,ANKRD18A,LINC01087,RP11-392E22.11,PLEKHB2,PLEKHB2,PLEKHB2
547	piR-61524	hsa_piRNA_547	DQ595412P	0.52216	0.7236	0.49583	0.0099368	0.27756	1	DTNBP1,RP11-145G20.1
104	piR-31303	hsa_piRNA_30768	DQ571191P	1.47194	2.07699	0.50201	0.00033927	0.04984	1	TATDN2,RP11-438J1.1
269	piR-34934	hsa_piRNA_27137	DQ596868P	0.44017	0.63074	0.51222	0.0026247	0.14908	1
396	piR-53617	hsa_piRNA_8454	DQ586505P	0.17128	0.2385	0.51705	0.0053788	0.20753	1
218	piR-31302	hsa_piRNA_30769	DQ571190P	2.48838	3.61252	0.55462	0.00170434	0.11945	1	RP11-438J1.1,TATDN2
99	piR-54979	hsa_piRNA_7092	DQ587867P	0.15971	0.23415	0.5618	0.00025501	0.03936	1	VLDLR,VLDLR-AS1
516	piR-55367	hsa_piRNA_6704	DQ588255P	0.26811	0.38495	0.56415	0.0088183	0.26111	1
249	piR-53400	hsa_piRNA_8671	DQ586288P	1.28899	1.87492	0.57278	0.0023159	0.14211	1	RP11-545A16.3
509	piR-39992	hsa_piRNA_22079	DQ601926P	0.08682	0.13402	0.57972	0.0085597	0.25694	1	AP000350.10
270	piR-61591	hsa_piRNA_480	DQ595479P	0.57609	0.84754	0.57987	0.0026378	0.14927	1	GOLGA2P11
474	piR-56657	hsa_piRNA_5414	DQ589545P	0.16847	0.24919	0.58672	0.0074413	0.23986	1	HARBI1,ATG13
83	piR-37721	hsa_piRNA_24350	DQ599655P	0.35054	0.52884	0.60052	0.0001602	0.02949	1
460	piR-31764	hsa_piRNA_30307	DQ571652P	0.32224	0.4773	0.61306	0.0070004	0.23252	1	TAF9,AK6
381	piR-39757	hsa_piRNA_22314	DQ601691P	0.65841	1.01964	0.61511	0.0050048	0.2007	1	LINC01016
286	piR-41633	hsa_piRNA_20438	DQ573521P	1.93381	3.04012	0.61896	0.0029768	0.15903	1	LINC00905,SNX33P1
498	piR-39243	hsa_piRNA_22828	DQ601177P	0.19984	0.30554	0.62284	0.0081032	0.24861	1
455	piR-60567	hsa_piRNA_1504	DQ594455P	0.13173	0.2022	0.63368	0.0068034	0.22846	1	CTD-2054N24.1,DNM1P46
546	piR-34984	hsa_piRNA_27087	DQ596918P	39.8842	65.7732	0.66938	0.0099246	0.27773	1
523	piR-58356	hsa_piRNA_3715	DQ591244P	32.8924	54.2148	0.67631	0.0090362	0.26398	1
361	piR-34819	hsa_piRNA_27252	DQ596753P	1.58779	2.47571	0.67764	0.0044151	0.18687	1	RP11-537H15.4,IMPDH1P10,RP13-39P12.2,RP6-186E3.1,CFLAR
136	piR-31304	hsa_piRNA_30767	DQ571192P	1.10032	1.74959	0.69217	0.00061754	0.06938	1	TATDN2,RP11-438J1.1
453	piR-53399	hsa_piRNA_8672	DQ586287P	1.06445	1.63499	0.69826	0.0067578	0.22793	1	RP11-545A16.3
351	piR-31812	hsa_piRNA_30259	DQ571700P	7.49562	11.7773	0.70356	0.0042428	0.18469	1
352	piR-58355	hsa_piRNA_3716	DQ591243P	31.3154	52.6883	0.70444	0.0042821	0.18587	1
284	piR-36011	hsa_piRNA_26060	DQ597945P	0.76075	1.2054	0.71101	0.0029627	0.15939	1
232	piR-47025	hsa_piRNA_15046	DQ578913P	0.83055	1.36394	0.71351	0.0019811	0.13047	1
476	piR-32058	hsa_piRNA_30013	DQ581946P	0.56066	0.90556	0.71702	0.0075247	0.24153	1	PRMT8
414	piR-33898	hsa_piRNA_28173	DQ593786P	0.32379	0.53469	0.73579	0.0059209	0.21852	1	RP11-545A16.3
274	piR-35922	hsa_piRNA_26149	DQ597856P	0.28854	0.47843	0.7736	0.002739	0.15273	1	RNF213,CTD-2047H16.4
111	piR-48099	hsa_piRNA_13972	DQ579987P	0.79423	1.43017	0.863	0.00040371	0.05557	1	ZNFX1
388	piR-47001	hsa_piRNA_15070	DQ578889P	0.29802	0.52717	0.87027	0.0051616	0.20326	1	RP11-545A16.3
266	piR-58948	hsa_piRNA_3123	DQ591836P	0.09865	0.1868	0.93486	0.0025957	0.1491	1
478	piR-41874	hsa_piRNA_20197	DQ573762P	2.49898	4.30977	0.9479	0.0075793	0.24227	1
294	piR-54451	hsa_piRNA_7620	DQ587339P	3.57176	7.18024	0.97829	0.0030979	0.161	1	EPB41L4A,EPB41L4A-AS1
289	piR-49463	hsa_piRNA_12608	DQ581351P	2.57804	5.26262	0.98063	0.0030195	0.15964	1	LCOR,HS3ST4,HMGN2P40,COMMD10,CLN6,HMGN2P47,HMGN2P46,HMGN2,SV2C,RP11-798K3.2,IL36G,HMGN2P41
93	piR-61160	hsa_piRNA_911	DQ595048P	1.02025	2.147	1.0461	0.00021808	0.03583	1	PLEKHB2,PLEKHB2,ANKRD18A,PLEKHB2,LINC01087,ANKRD18A,PLEKHB2,PLEKHB2,RP11-146D12.2,PLEKHB2,bP-21264C1.2,PLEKHB2,ANKRD18A,PLEKHB2,PLEKHB2,RP11-392E22.11,ANKRD18A,RP11-146D12.2,PLEKHB2,LINC01297
344	piR-60064	hsa_piRNA_2007	DQ593952P	1.0314	2.02977	1.04953	0.0041439	0.18405	1	CTD-2047H16.4,RNF213
445	piR-36039	hsa_piRNA_26032	DQ597973P	12.0728	23.3034	1.15414	0.0065576	0.22515	1
531	piR-44984	hsa_piRNA_17087	DQ576872P	15.0158	28.8515	1.15679	0.0093552	0.26919	1	SHF,RP11-519G16.2,DOCK10,CTD-2651B20.7,CTD-2651B20.6,SHF,SHF
413	piR-36040	hsa_piRNA_26031	DQ597974P	11.2586	22.0762	1.17872	0.0058636	0.21692	1
186	piR-34479	hsa_piRNA_27592	DQ596413P	0.86896	1.76611	1.19368	0.00120092	0.09865	1	SQSTM1,C5orf45
350	piR-36038	hsa_piRNA_26033	DQ597972P	9.0217	18.4038	1.21087	0.0042362	0.18493	1
101	piR-43294	hsa_piRNA_18777	DQ575182P	0.10031	0.22041	1.22917	0.00027694	0.04189	1	SQSTM1,C5orf45
209	piR-36222	hsa_piRNA_25849	DQ598156P	0.09947	0.23437	1.24244	0.00160258	0.11716	1	TRIM14
260	piR-44781	hsa_piRNA_17290	DQ576669P	0.84223	1.92867	1.25666	0.002501	0.14697	1	RP11-386M24.9
121	piR-55301	hsa_piRNA_6770	DQ588189P	0.28278	0.68122	1.28797	0.00050436	0.06369	1	RP11-403P17.5,TK2
167	piR-30123	hsa_piRNA_31948	DQ570011P	0.3446	0.83698	1.38589	0.00096452	0.08824	1	TXNRD1
257	piR-30033	hsa_piRNA_32038	DQ569921P	0.25278	0.77771	1.42888	0.0024577	0.14611	1
36	piR-36425	hsa_piRNA_25646	DQ598359P	0.38865	1.06972	1.48017	5.7318e-05	0.02433	0.87576	RP11-17M15.2
317	piR-47139	hsa_piRNA_14932	DQ579027P	0.28104	0.76884	1.51512	0.0035209	0.1697	1
63	piR-38587	hsa_piRNA_23484	DQ600521P	0.08954	0.27409	1.61237	0.000104516	0.02535	1	AP5Z1,FOXK1
73	piR-61505	hsa_piRNA_566	DQ595393P	1.80731	8.32638	2.29278	0.000142158	0.02975	1

## Sheet: S2
l	Name	ID	Accession Number	linear_average_mock	linear_average _time_15h_RSV_infection	log2_linear_average_15h_mock	p_value_15h_mock	benj_0_6	bonf_0_6	TARGETS
200	piR-38945	hsa_piRNA_23126	DQ600879P	1.29435	0.25187	-2.2636	0.00071818	0.05487	1	RP4-789D17.3,AGO1
33	piR-56993	hsa_piRNA_5078	DQ589881P	6.71155	1.44081	-2.17603	2.3861e-05	0.01105	0.36457	POLR2J4,UPK3BL,AC004951.5,RP11-514P8.8,POLR2J2,RP11-514P8.6,RP5-1165K10.2,RP11-514P8.7,POLR2J3
502	piR-32318	hsa_piRNA_29753	DQ582206P	7.93137	0.93406	-2.12192	0.0036188	0.11014	1	LINC01120
162	piR-32882	hsa_piRNA_29189	DQ582770P	0.96431	0.16644	-2.10272	0.00049943	0.0471	1	RP11-299H22.3
16	piR-45856	hsa_piRNA_16215	DQ577744P	13.9511	3.34173	-2.06457	3.5382e-06	0.00338	0.05406
211	piR-37981	hsa_piRNA_24090	DQ599915P	3.12083	0.69489	-2.03274	0.00079771	0.05776	1	STARD9
423	piR-45512	hsa_piRNA_16559	DQ577400P	1.33624	0.20175	-2.00143	0.0028239	0.102	1	NINJ2,RP5-1154L15.2
5	piR-45855	hsa_piRNA_16216	DQ577743P	15.1041	3.89658	-1.96055	9.0439e-07	0.00276	0.01382	TBC1D3P3,RP11-434D2.3,TBC1D3P4
568	piR-30049	hsa_piRNA_32022	DQ569937P	16.418	2.95837	-1.84322	0.0044621	0.12003	1	RP11-184C23.4,RP11-440J4.2,RP11-613H2.1
300	piR-46025	hsa_piRNA_16046	DQ577913P	24.7836	6.82666	-1.77155	0.00140198	0.0714	1	RP11-707O23.5,RP11-259G18.2
476	piR-41627	hsa_piRNA_20444	DQ573515P	1.4371	0.37862	-1.76695	0.0033759	0.10836	1	NUDT3
8	piR-45854	hsa_piRNA_16217	DQ577742P	15.2013	4.45847	-1.76593	1.6445e-06	0.00314	0.02513	TBC1D3P4,RP11-434D2.3,TBC1D3P3
175	piR-34141	hsa_piRNA_27930	DQ596075P	5.50652	1.57938	-1.73297	0.0005838	0.05097	1	RP11-114H24.2,RP11-114H24.7
569	piR-53794	hsa_piRNA_8277	DQ586682P	3.79134	1.13454	-1.68012	0.0044629	0.11984	1	NR2C2,MRPS25
819	piR-34283	hsa_piRNA_27788	DQ596217P	3.29575	0.61062	-1.61293	0.0082998	0.15484	1	RP1-63G5.5
236	piR-45346	hsa_piRNA_16725	DQ577234P	0.79536	0.22674	-1.49269	0.00095688	0.06195	1	LINC00905
11	piR-42438	hsa_piRNA_19633	DQ574326P	24.3947	8.77577	-1.47428	2.0352e-06	0.00283	0.0311
409	piR-60132	hsa_piRNA_1939	DQ594020P	22.938	7.94987	-1.47083	0.0026202	0.09788	1	RP13-39P12.2
539	piR-52607	hsa_piRNA_9464	DQ585495P	0.49416	0.16377	-1.46064	0.0041195	0.11678	1	ZNF181
822	piR-60643	hsa_piRNA_1428	DQ594531P	0.70115	0.17175	-1.45853	0.0083396	0.15501	1	ATP7B,STX3,AKAP13,CTD-2262B20.1,FABP5P7,RP11-363E6.3,FABP5P1,FABP5P11,FABP5P2,FABP5
382	piR-42627	hsa_piRNA_19444	DQ574515P	1.57973	0.52407	-1.43618	0.0023004	0.09201	1
83	piR-43981	hsa_piRNA_18090	DQ575869P	0.6017	0.21447	-1.42743	0.000143787	0.02647	1
17	piR-32729	hsa_piRNA_29342	DQ582617P	0.30147	0.11377	-1.41209	3.9096e-06	0.00351	0.05973
325	piR-42933	hsa_piRNA_19138	DQ574821P	0.54569	0.21369	-1.37948	0.00161812	0.07607	1	SLC24A3
532	piR-47513	hsa_piRNA_14558	DQ579401P	17.3726	6.33528	-1.37627	0.0040795	0.11716	1	RP11-157B13.8
701	piR-55584	hsa_piRNA_6487	DQ588472P	0.7692	0.22415	-1.35988	0.0062812	0.13691	1
806	piR-47826	hsa_piRNA_14245	DQ579714P	2.62679	0.74666	-1.3553	0.0080765	0.1531	1	LINC00905
13	piR-50446	hsa_piRNA_11625	DQ583334P	2.32562	0.9144	-1.35026	2.8754e-06	0.00338	0.04393	HIST1H2AC
121	piR-31802	hsa_piRNA_30269	DQ571690P	1.05465	0.40605	-1.33549	0.00029849	0.03769	1
631	piR-49210	hsa_piRNA_12861	DQ581098P	1.14919	0.42056	-1.33107	0.0053413	0.12933	1	KANTR
641	piR-42202	hsa_piRNA_19869	DQ574090P	115.544	42.5704	-1.32631	0.0054445	0.12978	1	SH3PXD2A
24	piR-36107	hsa_piRNA_25964	DQ598041P	5.89944	2.40319	-1.32036	1.97381e-05	0.01257	0.30158	HIST1H4J,HIST1H4K
216	piR-42654	hsa_piRNA_19417	DQ574542P	0.59393	0.22584	-1.31829	0.0008219	0.05814	1	RP11-361L15.5,CES4A
20	piR-41112	hsa_piRNA_20959	DQ573000P	2.89772	1.14488	-1.30376	1.68054e-05	0.01284	0.25677	RP3-468B3.2
636	piR-51538	hsa_piRNA_10533	DQ584426P	3.29051	1.26316	-1.29929	0.0054014	0.12976	1	LINC00094,BRD3
98	piR-57170	hsa_piRNA_4901	DQ590058P	36.584	13.8373	-1.29795	0.00020335	0.0317	1	GOLGA2P11
722	piR-45435	hsa_piRNA_16636	DQ577323P	0.38299	0.11979	-1.27679	0.0067425	0.14269	1
185	piR-31751	hsa_piRNA_30320	DQ571639P	7.59523	3.1685	-1.24868	0.00065553	0.05414	1	HIST1H2BC
524	piR-53714	hsa_piRNA_8357	DQ586602P	100.672	38.5608	-1.24206	0.0039824	0.11612	1	PSMB7
279	piR-47592	hsa_piRNA_14479	DQ579480P	0.28844	0.11568	-1.21755	0.001276	0.06988	1	HIVEP3,RPS6KA2,RP11-514O12.4,RP4-735C1.6,NKAIN3
141	piR-37268	hsa_piRNA_24803	DQ599202P	0.28532	0.12118	-1.21478	0.00041634	0.04512	1
120	piR-49114	hsa_piRNA_12957	DQ581002P	1.7057	0.72392	-1.19674	0.00029749	0.03788	1	LINC01016
549	piR-31072	hsa_piRNA_30999	DQ570960P	1.21143	0.53181	-1.18766	0.0042026	0.11696	1	GOLGA6L16P,GOLGA2,GOLGA6A,RP11-114H24.2,GOLGA6L10,RP11-24M17.5,GOLGA6D,GOLGA6L4,AC068831.10,RP11-114H24.7,GOLGA6B,GOLGA6L3,GOLGA6L9,RP11-697E2.12,GOLGA6L17P,GOLGA2P8,GOLGA6L11P,RP11-361M10.3,GOLGA6D,RP11-1006G14.2,RP11-299H22.3,GOLGA6C,GOLGA6L5P
623	piR-47807	hsa_piRNA_14264	DQ579695P	9.88242	4.005	-1.18599	0.0052029	0.1276	1	DSP
893	piR-33753	hsa_piRNA_28318	DQ593641P	0.80768	0.23353	-1.17229	0.0099173	0.16968	1	RP11-586K12.11
581	piR-52755	hsa_piRNA_9316	DQ585643P	36.1069	16.2056	-1.16497	0.0046372	0.12195	1	DSP
402	piR-42428	hsa_piRNA_19643	DQ574316P	43.9582	16.8276	-1.16106	0.0025199	0.09578	1
408	piR-50242	hsa_piRNA_11829	DQ583130P	1.66422	0.64836	-1.15442	0.0026189	0.09807	1	GRIN2A
210	piR-35007	hsa_piRNA_27064	DQ596941P	0.36566	0.14446	-1.14838	0.00079641	0.05794	1	TMX2-CTNND1,RP11-613M10.9,TMX2P1,SLC25A51,TMX2
346	piR-40791	hsa_piRNA_21280	DQ572679P	9.27268	4.10591	-1.14641	0.0018406	0.08128	1	RP13-39P12.2
609	piR-42425	hsa_piRNA_19646	DQ574313P	31.6464	11.9739	-1.14233	0.0050165	0.12586	1	AC016757.3
298	piR-49010	hsa_piRNA_13061	DQ580898P	0.23077	0.0973	-1.12311	0.00139843	0.0717	1
182	piR-48734	hsa_piRNA_13337	DQ580622P	0.38008	0.16632	-1.11304	0.00063614	0.0534	1	SORCS2,DHX30
717	piR-50241	hsa_piRNA_11830	DQ583129P	1.30896	0.5083	-1.10953	0.0066617	0.14196	1	GRIN2A
224	piR-38133	hsa_piRNA_23938	DQ600067P	5.63144	2.60572	-1.1068	0.00088017	0.06004	1	SLC7A6OS,SLC7A6
647	piR-58650	hsa_piRNA_3421	DQ591538P	6.45898	2.72056	-1.10635	0.00552	0.13036	1
296	piR-50473	hsa_piRNA_11598	DQ583361P	0.33184	0.14772	-1.10454	0.00139549	0.07203	1
779	piR-32212	hsa_piRNA_29859	DQ582100P	2.02896	0.8195	-1.09527	0.0075381	0.14785	1
650	piR-31074	hsa_piRNA_30997	DQ570962P	9.59113	4.12699	-1.07806	0.0055243	0.12986	1
147	piR-54826	hsa_piRNA_7245	DQ587714P	1.49408	0.73735	-1.07596	0.00042474	0.04415	1	HIST1H2BG
566	piR-35323	hsa_piRNA_26748	DQ597257P	10.948	4.7386	-1.06823	0.0044222	0.11938	1
621	piR-58649	hsa_piRNA_3422	DQ591537P	8.75326	3.79277	-1.06375	0.0051607	0.12697	1
705	piR-30796	hsa_piRNA_31275	DQ570684P	6.65169	2.86822	-1.06129	0.0063814	0.1383	1
731	piR-34099	hsa_piRNA_27972	DQ596033P	0.29848	0.12915	-1.05832	0.0068755	0.14371	1
709	piR-37852	hsa_piRNA_24219	DQ599786P	11.4317	4.76035	-1.0574	0.006558	0.14133	1
43	piR-50386	hsa_piRNA_11685	DQ583274P	0.2766	0.13254	-1.05036	4.0405e-05	0.01436	0.61735	WDR77
706	piR-48008	hsa_piRNA_14063	DQ579896P	7.76493	3.07893	-1.04926	0.0064441	0.13946	1	MYH10,NDEL1
140	piR-43641	hsa_piRNA_18430	DQ575529P	1.30059	0.60933	-1.04916	0.00040072	0.04373	1
166	piR-45848	hsa_piRNA_16223	DQ577736P	0.45506	0.2182	-1.04128	0.00051851	0.04772	1	CYP19A1
776	piR-47944	hsa_piRNA_14127	DQ579832P	13.3221	5.58327	-1.03758	0.0075033	0.14774	1
622	piR-42929	hsa_piRNA_19142	DQ574817P	14.5291	6.57349	-1.03326	0.0051778	0.12719	1
741	piR-35793	hsa_piRNA_26278	DQ597727P	0.63166	0.29221	-1.02847	0.0070617	0.14561	1	UNC119B,RP11-173P15.5
440	piR-46728	hsa_piRNA_15343	DQ578616P	0.42108	0.19031	-1.02317	0.0030382	0.1055	1
504	piR-46468	hsa_piRNA_15603	DQ578356P	0.21913	0.10267	-1.01556	0.003642	0.11041	1	RP6-186E3.1,RP11-537H15.4,RP11-528A10.1,IMPDH1
426	piR-42426	hsa_piRNA_19645	DQ574314P	44.8707	19.7457	-1.01475	0.00286	0.10258	1	AC016757.3
454	piR-38904	hsa_piRNA_23167	DQ600838P	4.15875	2.04139	-0.99633	0.0031774	0.10693	1	REPS2,TBC1D23,DNAJC15,TTC5,PROM1,RP11-234B24.6,RP11-1007I13.4,CHODL,MERTK,CLEC6A,TPRG1,TMEM51-AS1,RP5-965G21.4,LINC00707,TTLL3,GALNT8,ARL17B,RRP12,RP11-452K12.7,LINC00707
375	piR-42427	hsa_piRNA_19644	DQ574315P	57.1392	25.9834	-0.99055	0.0022026	0.08974	1
792	piR-40868	hsa_piRNA_21203	DQ572756P	1.20208	0.49038	-0.98921	0.0078443	0.15133	1
87	piR-33094	hsa_piRNA_28977	DQ592982P	3.75396	1.86704	-0.98797	0.00015947	0.02801	1
727	piR-52621	hsa_piRNA_9450	DQ585509P	0.28579	0.1357	-0.97728	0.0067987	0.14288	1	RP6-186E3.1,RP11-528A10.1,IMPDH1,RP11-537H15.4
248	piR-42624	hsa_piRNA_19447	DQ574512P	138.532	68.801	-0.97087	0.00103972	0.06406	1	LINC00905
538	piR-41751	hsa_piRNA_20320	DQ573639P	0.22895	0.10921	-0.96754	0.004119	0.11698	1	RP11-173P15.5,UNC119B
366	piR-41128	hsa_piRNA_20943	DQ573016P	2.97913	1.47314	-0.96587	0.0020596	0.08598	1	UBE2D2,UBTD1,CTNNA3
251	piR-44654	hsa_piRNA_17417	DQ576542P	57.5378	28.6431	-0.96185	0.00106236	0.06467	1
463	piR-50660	hsa_piRNA_11411	DQ583548P	2.59827	1.37186	-0.95322	0.0032444	0.10707	1
571	piR-49961	hsa_piRNA_12110	DQ581849P	0.34361	0.16907	-0.95189	0.004499	0.12039	1	ENDOG,C9orf114
688	piR-44774	hsa_piRNA_17297	DQ576662P	1.56268	0.71474	-0.95117	0.006136	0.13627	1	RP11-173P15.5,UNC119B
257	piR-51047	hsa_piRNA_11024	DQ583935P	55.7763	27.9441	-0.95086	0.00114069	0.06782	1
28	piR-61459	hsa_piRNA_612	DQ595347P	6.89869	3.54753	-0.95022	2.0943e-05	0.01143	0.31999
468	piR-30584	hsa_piRNA_31487	DQ570472P	23.5391	11.5586	-0.93494	0.0032837	0.1072	1
351	piR-44653	hsa_piRNA_17418	DQ576541P	61.8491	31.3565	-0.93099	0.00191724	0.08346	1
332	piR-32166	hsa_piRNA_29905	DQ582054P	0.87829	0.45086	-0.92898	0.00171606	0.07897	1
68	piR-57925	hsa_piRNA_4146	DQ590813P	24.2616	12.3806	-0.92835	0.000102293	0.02298	1	RP1-63G5.5
158	piR-40545	hsa_piRNA_21526	DQ572433P	1.04805	0.54526	-0.91491	0.0004828	0.04669	1	RP11-266O8.1,RP11-164C12.2
507	piR-57390	hsa_piRNA_4681	DQ590278P	0.41705	0.19595	-0.9091	0.0036636	0.11041	1	GOLGA2P7,CSPG4P12
474	piR-32740	hsa_piRNA_29331	DQ582628P	0.32855	0.16462	-0.90903	0.0033371	0.10757	1	CTC-523E23.4
42	piR-37076	hsa_piRNA_24995	DQ599010P	3.53118	1.87766	-0.90055	3.9769e-05	0.01447	0.60763
383	piR-47273	hsa_piRNA_14798	DQ579161P	27.6627	14.7208	-0.89154	0.0023009	0.09179	1	LINC00442,PHF2P2
679	piR-31757	hsa_piRNA_30314	DQ571645P	3.26879	1.73649	-0.88922	0.0059786	0.13453	1	PRMT8
856	piR-60713	hsa_piRNA_1358	DQ594601P	1.74185	0.80748	-0.88204	0.0090358	0.16128	1	AC004702.2,SPECC1
752	piR-36987	hsa_piRNA_25084	DQ598921P	4.51925	2.41902	-0.87175	0.0072416	0.14713	1	ZSCAN21,ZNF3
19	piR-52735	hsa_piRNA_9336	DQ585623P	2.41823	1.32173	-0.86667	1.59049e-05	0.01279	0.24301	POTEE,POTEM,POTEM,POTEF,PLEKHB2,POTEH,POTEG,POTEH,POTEH,POTEG
712	piR-34928	hsa_piRNA_27143	DQ596862P	0.29497	0.15134	-0.86438	0.0065957	0.14154	1	RP11-522I20.3
65	piR-36665	hsa_piRNA_25406	DQ598599P	5.96885	3.20445	-0.86293	0.00010086	0.02371	1	RP3-468B3.2
34	piR-50471	hsa_piRNA_11600	DQ583359P	2.22659	1.21297	-0.86122	2.4394e-05	0.01096	0.37272
193	piR-32405	hsa_piRNA_29666	DQ582293P	80.3444	43.6475	-0.85795	0.0006797	0.05381	1	RP11-329B9.1
802	piR-45357	hsa_piRNA_16714	DQ577245P	0.23285	0.12306	-0.85379	0.0080035	0.15248	1	RP11-458F8.1
342	piR-36048	hsa_piRNA_26023	DQ597982P	1.91218	0.99842	-0.84774	0.00179864	0.08036	1	RP11-146D12.2,FAM95B1
482	piR-49463	hsa_piRNA_12608	DQ581351P	2.57804	1.36551	-0.8457	0.00344	0.10905	1	HMGN2,HMGN2P41,RP11-798K3.2,HMGN2P40,COMMD10,HMGN2P47,HS3ST4,HMGN2P46,IL36G,CLN6,SV2C,LCOR
86	piR-45465	hsa_piRNA_16606	DQ577353P	0.52992	0.29294	-0.84348	0.000159039	0.02826	1	SDCCAG8
62	piR-54616	hsa_piRNA_7455	DQ587504P	13.0017	7.14488	-0.84194	8.4505e-05	0.02083	1
227	piR-31644	hsa_piRNA_30427	DQ571532P	20.0523	10.5588	-0.84036	0.00089992	0.06057	1	RP11-299H22.3
335	piR-57252	hsa_piRNA_4819	DQ590140P	1.61484	0.88973	-0.83796	0.00173556	0.07916	1	LINC00905
10	piR-51953	hsa_piRNA_10118	DQ584841P	2.54821	1.42636	-0.83386	1.8719e-06	0.00286	0.0286	HIST1H2BH,HIST1H2BO
471	piR-46801	hsa_piRNA_15270	DQ578689P	0.49918	0.25935	-0.83292	0.0033181	0.10764	1	RP11-266O8.1,RP11-164C12.2
292	piR-30752	hsa_piRNA_31319	DQ570640P	2.85831	1.58064	-0.83255	0.00136217	0.07128	1	DSP
441	piR-38376	hsa_piRNA_23695	DQ600310P	63.8896	34.3875	-0.82974	0.0030395	0.10531	1	YWHAG
237	piR-57414	hsa_piRNA_4657	DQ590302P	0.32122	0.17966	-0.82293	0.00095754	0.06173	1	CHST1
282	piR-43508	hsa_piRNA_18563	DQ575396P	0.44405	0.25699	-0.82221	0.00129812	0.07033	1
723	piR-31311	hsa_piRNA_30760	DQ571199P	11.9122	6.83557	-0.81845	0.0067448	0.14254	1	CASC1,SLC27A2,ASIC2,ADAM23
760	piR-48336	hsa_piRNA_13735	DQ580224P	0.78683	0.39379	-0.81062	0.0073354	0.14747	1	PRMT8
746	piR-57084	hsa_piRNA_4987	DQ589972P	2.10745	1.16128	-0.81039	0.0071363	0.14616	1
657	piR-31841	hsa_piRNA_30230	DQ571729P	0.90704	0.49293	-0.79977	0.0056184	0.13066	1
136	piR-37690	hsa_piRNA_24381	DQ599624P	0.71158	0.40507	-0.79888	0.00038333	0.04307	1	LINC00905
139	piR-47110	hsa_piRNA_14961	DQ578998P	0.60588	0.34273	-0.79873	0.00039884	0.04384	1	RP11-344E13.3,USP22
435	piR-30448	hsa_piRNA_31623	DQ570336P	0.47395	0.26257	-0.79429	0.0029811	0.10471	1
662	piR-42602	hsa_piRNA_19469	DQ574490P	33.3066	18.2205	-0.7927	0.0057243	0.13212	1	CCDC134
119	piR-59369	hsa_piRNA_2702	DQ592257P	0.97042	0.57345	-0.78094	0.00029626	0.03804	1
710	piR-47658	hsa_piRNA_14413	DQ579546P	0.20028	0.10947	-0.77721	0.0065626	0.14123	1	USP22,RP11-344E13.3
511	piR-60249	hsa_piRNA_1822	DQ594137P	0.27981	0.16198	-0.77616	0.0037226	0.11131	1
253	piR-54919	hsa_piRNA_7152	DQ587807P	15.9381	9.50768	-0.776	0.00110265	0.06659	1	CYP19A1,RP11-108K3.1
406	piR-59855	hsa_piRNA_2216	DQ592743P	4.15007	2.38461	-0.77477	0.0025954	0.09767	1
627	piR-55251	hsa_piRNA_6820	DQ588139P	1.13932	0.62998	-0.76917	0.0052236	0.12729	1
168	piR-30130	hsa_piRNA_31941	DQ570018P	6.2808	3.62662	-0.76807	0.0005219	0.04746	1	RP11-381O7.3,RP11-574E24.3,RP11-574E24.3
288	piR-59464	hsa_piRNA_2607	DQ592352P	0.18754	0.10918	-0.76601	0.00134215	0.0712	1	EIF3FP3
255	piR-32452	hsa_piRNA_29619	DQ582340P	7.87181	4.36124	-0.76375	0.00111548	0.06684	1	CYP19A1,RP11-108K3.1,SLC18A1
243	piR-32305	hsa_piRNA_29766	DQ582193P	205.774	118.251	-0.76099	0.00100064	0.06292	1
53	piR-35911	hsa_piRNA_26160	DQ597845P	5.81679	3.40358	-0.76026	5.8801e-05	0.01695	0.89842	KIAA1671
154	piR-30742	hsa_piRNA_31329	DQ570630P	35.4122	20.6098	-0.75892	0.00046448	0.04608	1
739	piR-61513	hsa_piRNA_558	DQ595401P	0.17445	0.09387	-0.75413	0.0069633	0.14397	1	TBC1D3P3,RP11-434D2.3,USP6,TBC1D3P4
72	piR-54566	hsa_piRNA_7505	DQ587454P	1.47815	0.87813	-0.75358	0.000116732	0.02477	1
385	piR-40373	hsa_piRNA_21698	DQ572261P	1.56515	0.9622	-0.75099	0.0023185	0.09201	1
467	piR-61450	hsa_piRNA_621	DQ595338P	2.22091	1.28436	-0.75099	0.0032831	0.10741	1	TMX2P1,RP11-613M10.9,TMX2-CTNND1,TMX2,SLC25A51
312	piR-47595	hsa_piRNA_14476	DQ579483P	0.77837	0.44806	-0.74559	0.00149808	0.07336	1
419	piR-55066	hsa_piRNA_7005	DQ587954P	0.54268	0.31671	-0.74345	0.002777	0.10126	1	GRIN2A,IMPDH1
494	piR-46271	hsa_piRNA_15800	DQ578159P	1.66132	0.96063	-0.74214	0.0035392	0.10946	1	TUBB,TUBBP1,TUBBP2
291	piR-34641	hsa_piRNA_27430	DQ596575P	34.1911	19.66	-0.74196	0.00136037	0.07143	1	CTC-523E23.4,CTC-523E23.1
807	piR-31077	hsa_piRNA_30994	DQ570965P	0.67333	0.38328	-0.73978	0.0080987	0.15333	1	HTR5BP
756	piR-52551	hsa_piRNA_9520	DQ585439P	8.41341	5.21396	-0.73928	0.0072786	0.1471	1	CTC-523E23.11,CTC-523E23.5
314	piR-31597	hsa_piRNA_30474	DQ571485P	0.56769	0.3324	-0.73846	0.00151667	0.0738	1
773	piR-50599	hsa_piRNA_11472	DQ583487P	4.98885	2.91341	-0.73566	0.0074802	0.14785	1	RP3-468B3.2
509	piR-40245	hsa_piRNA_21826	DQ572133P	0.56149	0.33954	-0.73538	0.0037173	0.11158	1	RP11-451H23.3
266	piR-43793	hsa_piRNA_18278	DQ575681P	0.83103	0.48877	-0.7342	0.00118361	0.06799	1	BACE1
229	piR-32925	hsa_piRNA_29146	DQ582813P	0.61643	0.36978	-0.73386	0.00091608	0.06112	1
116	piR-54050	hsa_piRNA_8021	DQ586938P	57.9565	34.7896	-0.73034	0.00028042	0.03694	1	NPAP1P6
465	piR-45853	hsa_piRNA_16218	DQ577741P	47.2665	28.2785	-0.72959	0.0032779	0.10771	1	RP1-63G5.5
388	piR-40442	hsa_piRNA_21629	DQ572330P	8.00301	4.60259	-0.72817	0.0023381	0.09207	1
392	piR-54083	hsa_piRNA_7988	DQ586971P	14.3167	8.36828	-0.72462	0.0024191	0.09429	1	BRCA1
839	piR-49542	hsa_piRNA_12529	DQ581430P	0.38266	0.23584	-0.72259	0.0086839	0.15814	1	GOLGA2P11
703	piR-32514	hsa_piRNA_29557	DQ582402P	2.84753	1.69029	-0.71885	0.0063365	0.13772	1	LINC01015
306	piR-32676	hsa_piRNA_29395	DQ582564P	5.75571	3.48266	-0.71354	0.00145612	0.07271	1	LINC00964,STXBP4
783	piR-60113	hsa_piRNA_1958	DQ594001P	0.54595	0.33313	-0.70923	0.0076353	0.14899	1	VKORC1L1
263	piR-38412	hsa_piRNA_23659	DQ600346P	10.5795	6.27427	-0.7037	0.00116097	0.06745	1
466	piR-39755	hsa_piRNA_22316	DQ601689P	0.73283	0.44439	-0.70227	0.0032828	0.10763	1	TDRG1
230	piR-57254	hsa_piRNA_4817	DQ590142P	0.46233	0.28167	-0.70214	0.00092074	0.06117	1
882	piR-52806	hsa_piRNA_9265	DQ585694P	0.5745	0.32528	-0.70213	0.0095983	0.16627	1	LINC00905,SNX33P1
526	piR-40364	hsa_piRNA_21707	DQ572252P	0.34749	0.20758	-0.70153	0.0040365	0.11725	1	AC004076.9,ZNF749
821	piR-50773	hsa_piRNA_11298	DQ583661P	0.31566	0.19279	-0.70121	0.0083198	0.15483	1
252	piR-32551	hsa_piRNA_29520	DQ582439P	6.85678	4.18431	-0.70071	0.00107517	0.06519	1	CTC-347C20.1
389	piR-37545	hsa_piRNA_24526	DQ599479P	94.7741	57.5904	-0.69934	0.002345	0.09211	1	GOLGA2P11
535	piR-46974	hsa_piRNA_15097	DQ578862P	0.5151	0.30544	-0.69656	0.0041041	0.11721	1	MEPCE
757	piR-30389	hsa_piRNA_31682	DQ570277P	0.20788	0.12073	-0.69048	0.0073162	0.14767	1	DGCR9,DGCR5
107	piR-42174	hsa_piRNA_19897	DQ574062P	0.2209	0.13501	-0.69013	0.00024144	0.03448	1	CTC-523E23.4
180	piR-44504	hsa_piRNA_17567	DQ576392P	2.42599	1.47612	-0.69009	0.00061504	0.05221	1	POM121L10P,POM121L7,POM121L9P,POM121L1P,AC008132.13,FAM230B,POM121L8P
322	piR-31265	hsa_piRNA_30806	DQ571153P	1.77419	1.09963	-0.6896	0.00158372	0.07515	1	RP11-299H22.3
550	piR-43215	hsa_piRNA_18857	DQ575103P	0.32212	0.1979	-0.68941	0.0042183	0.11718	1
718	piR-55406	hsa_piRNA_6665	DQ588294P	11.9168	7.14361	-0.68865	0.0066627	0.14178	1
472	piR-51018	hsa_piRNA_11053	DQ583906P	0.26192	0.16052	-0.68744	0.0033201	0.10747	1	PLA2G4A,CTC-513N18.6
499	piR-52944	hsa_piRNA_9127	DQ585832P	1.35838	0.80518	-0.68673	0.0035563	0.10889	1	LINC00865,RP11-248C1.3
143	piR-50868	hsa_piRNA_11203	DQ583756P	0.40033	0.2414	-0.68559	0.00041817	0.04468	1	PTPRN2
841	piR-35938	hsa_piRNA_26133	DQ597872P	3.43638	2.06262	-0.68253	0.008739	0.15877	1	RP11-753D20.1
135	piR-58036	hsa_piRNA_4035	DQ590924P	204.113	124.577	-0.68218	0.00037998	0.04301	1
317	piR-31991	hsa_piRNA_30080	DQ571879P	2.56799	1.61698	-0.68014	0.0015247	0.07349	1	GID8
478	piR-41352	hsa_piRNA_20719	DQ573240P	1.11762	0.7023	-0.67824	0.0033772	0.10795	1	RP11-144G6.12,BMS1P1,BMS1P7,BMS1P2,BMS1P1
696	piR-30784	hsa_piRNA_31287	DQ570672P	0.48902	0.2812	-0.67722	0.0062023	0.13616	1	CTC-559E9.12
853	piR-58728	hsa_piRNA_3343	DQ591616P	0.4867	0.29211	-0.67616	0.0089813	0.16087	1
836	piR-31076	hsa_piRNA_30995	DQ570964P	3.71768	2.23101	-0.67579	0.0086393	0.15789	1
170	piR-49021	hsa_piRNA_13050	DQ580909P	116.721	71.8881	-0.67539	0.00055778	0.05013	1	LINC00937
872	piR-47029	hsa_piRNA_15042	DQ578917P	41.2371	25.8461	-0.67528	0.0093431	0.16371	1	LINC01120
825	piR-50485	hsa_piRNA_11586	DQ583373P	180.157	112.24	-0.67027	0.0083976	0.15552	1	ZHX3,PLCG1
540	piR-49541	hsa_piRNA_12530	DQ581429P	0.54638	0.34113	-0.66931	0.0041234	0.11667	1	GOLGA2P11
173	piR-32962	hsa_piRNA_29109	DQ582850P	12.6641	7.76769	-0.66754	0.00056362	0.04978	1	SCAP
750	piR-47922	hsa_piRNA_14149	DQ579810P	51.5162	33.0561	-0.66719	0.0072203	0.14709	1	CTD-3162L10.1,CTD-3162L10.1
458	piR-31351	hsa_piRNA_30720	DQ571239P	4.41933	2.68882	-0.66454	0.0032224	0.1075	1	RP1-63G5.5
793	piR-42005	hsa_piRNA_20066	DQ573893P	0.20213	0.122	-0.66259	0.0078558	0.15136	1	LRRC37A16P,LRRC37A4P,LRRC37A17P,ARL17A,MANBA,LRRC37A5P,ARL17B,RP11-156P1.3,LRRC37A,LRRC37B,LRRC37A2,LRRC37A4P
355	piR-54761	hsa_piRNA_7310	DQ587649P	6.67962	4.20186	-0.65922	0.00193932	0.08347	1	ZNF395
103	piR-33592	hsa_piRNA_28479	DQ593480P	0.17089	0.10714	-0.65371	0.00022487	0.03336	1
456	piR-33969	hsa_piRNA_28102	DQ593857P	0.84801	0.51909	-0.65197	0.0031976	0.10714	1
424	piR-49108	hsa_piRNA_12963	DQ580996P	48.6805	30.4822	-0.64848	0.002838	0.10227	1	GOLGA8O,GOLGA8R,GOLGA8K,GOLGA8CP,GOLGA8I,GOLGA8Q,GOLGA8T,GOLGA8H,GOLGA8G,GOLGA8UP,GOLGA8J,GOLGA8S,DNM1P46,CTD-2054N24.1,GOLGA8M,GOLGA8N,GOLGA8DP,RP11-1000B6.8,GOLGA8F,GOLGA8EP
620	piR-54594	hsa_piRNA_7477	DQ587482P	12.792	7.90895	-0.64736	0.0051215	0.12621	1
190	piR-50124	hsa_piRNA_11947	DQ583012P	2.76507	1.73515	-0.64728	0.00067588	0.05435	1	CAND2
159	piR-58447	hsa_piRNA_3624	DQ591335P	49.2651	31.5187	-0.6447	0.00048363	0.04647	1	RP11-108K3.1,CYP19A1
774	piR-46023	hsa_piRNA_16048	DQ577911P	0.29081	0.18569	-0.64129	0.0074976	0.148	1	SLC7A6,SLC7A6OS
694	piR-56345	hsa_piRNA_5726	DQ589233P	70.5774	43.8717	-0.64106	0.0061951	0.13639	1
390	piR-33602	hsa_piRNA_28469	DQ593490P	3.69789	2.41458	-0.64094	0.0023779	0.09316	1	RP13-580B18.4,RP11-384K6.6,RP11-384K6.2
508	piR-30364	hsa_piRNA_31707	DQ570252P	0.78173	0.50055	-0.63923	0.0036955	0.11115	1	DGCR9,DGCR5
685	piR-35890	hsa_piRNA_26181	DQ597824P	50.8568	31.8857	-0.63874	0.0060774	0.13556	1	RP3-468B3.2
256	piR-50006	hsa_piRNA_12065	DQ581894P	9.88603	6.51	-0.63858	0.00111951	0.06682	1	RP11-795H16.3,RPS3AP30,RPS3AP29,RPS3AP49,RP11-747H12.5,RP11-379B18.6,BAIAP2L1,RPS3A,RPS3AP14,CTD-2026G6.3,EPB42,RPS3AP47,RPS3AP35,SH3D19,RP13-726E6.2,RPS3AP6,RPS3AP41,RPS3AP15,RP11-489M13.1,RPS3AP26,RPS3AP25,RPS3AP5,RPS3AP39,RP11-52B19.1,RPS3AP33,RPS3AP40
226	piR-43072	hsa_piRNA_18999	DQ574960P	0.51765	0.32915	-0.63517	0.00088407	0.05977	1	AC006552.1
808	piR-56229	hsa_piRNA_5842	DQ589117P	6.72729	4.17351	-0.63224	0.0080999	0.15317	1	MIR31HG,MDGA2,RP5-1139I1.1,ERVH-1,UGP2,RP11-325B23.2,SERINC5,AC096559.1,MGC32805,EIF3E,RP11-380P13.1,RP11-256I9.3,FHIT,CTD-2058B24.2,NPSR1-AS1,GRIP1,RP11-174G6.1,CP,NTN4,RP11-359M6.1,MAML2,TBC1D23,RP11-215E13.1,ZNF600,AC072062.1,MT1A,RP11-231E6.1,RP11-54H7.4,GBE1
536	piR-56298	hsa_piRNA_5773	DQ589186P	16.9697	10.7883	-0.6258	0.0041157	0.11732	1	SPATA8
171	piR-61363	hsa_piRNA_708	DQ595251P	6.59803	4.24966	-0.62569	0.00055923	0.04997	1	HIST1H2BJ
122	piR-55100	hsa_piRNA_6971	DQ587988P	0.24196	0.15469	-0.62462	0.00030139	0.03775	1	RP11-164C12.2,RP11-266O8.1
732	piR-58732	hsa_piRNA_3339	DQ591620P	0.48845	0.31523	-0.62461	0.0068775	0.14355	1	ZNF106
577	piR-56582	hsa_piRNA_5489	DQ589470P	2.10545	1.39102	-0.62155	0.0045785	0.12124	1
307	piR-49963	hsa_piRNA_12108	DQ581851P	3.05274	1.98416	-0.62076	0.00145746	0.07254	1	AGAP1
490	piR-47480	hsa_piRNA_14591	DQ579368P	19.9961	13.1861	-0.61993	0.0035163	0.10964	1
203	piR-58838	hsa_piRNA_3233	DQ591726P	0.40792	0.26448	-0.61577	0.00074371	0.05598	1	CTC-523E23.4
563	piR-61993	hsa_piRNA_78	DQ595881P	0.30008	0.18901	-0.61401	0.0043249	0.11737	1	SLC7A6OS,SLC7A6
576	piR-43849	hsa_piRNA_18222	DQ575737P	5.08731	3.22485	-0.6138	0.0045766	0.1214	1	RPL17P25,WDR47,RPL17-C18orf32,RP11-20O24.4,RP4-612B15.2,PIGK,MIR1539,RPL17,RP4-706A16.3,C18orf32
875	piR-38040	hsa_piRNA_24031	DQ599974P	1.15197	0.71802	-0.61153	0.0094774	0.16549	1	LRRC37A2,ARL17B,ARL17A,LRRC37A
259	piR-58863	hsa_piRNA_3208	DQ591751P	0.98384	0.64753	-0.61021	0.00114249	0.0674	1	RP1-63G5.5
587	piR-46527	hsa_piRNA_15544	DQ578415P	0.44001	0.27686	-0.60802	0.004737	0.1233	1	TUBGCP4,TP53BP1
104	piR-41801	hsa_piRNA_20270	DQ573689P	4.52889	2.9547	-0.60681	0.00023935	0.03516	1	RP3-468B3.2
582	piR-33057	hsa_piRNA_29014	DQ592945P	1.04927	0.68169	-0.60213	0.0046597	0.12233	1	CIRBP
194	piR-54224	hsa_piRNA_7847	DQ587112P	25.8855	16.7293	-0.60086	0.00068144	0.05367	1	FAR2P1
343	piR-32333	hsa_piRNA_29738	DQ582221P	161.856	106.476	-0.59952	0.00181604	0.0809	1
338	piR-50780	hsa_piRNA_11291	DQ583668P	82.8798	52.6339	-0.59951	0.00175973	0.07955	1
76	piR-43594	hsa_piRNA_18477	DQ575482P	1.81044	1.18473	-0.59926	0.000120097	0.02414	1
596	piR-36651	hsa_piRNA_25420	DQ598585P	11.3769	7.30524	-0.59895	0.0048399	0.12408	1
735	piR-50402	hsa_piRNA_11669	DQ583290P	8.53664	5.49802	-0.59613	0.0069023	0.14348	1	RP11-145G20.1
128	piR-56002	hsa_piRNA_6069	DQ588890P	10.7165	6.98764	-0.59248	0.00032243	0.03849	1
191	piR-49057	hsa_piRNA_13014	DQ580945P	36.3352	24.2286	-0.59133	0.00067796	0.05423	1
486	piR-58862	hsa_piRNA_3209	DQ591750P	2.09061	1.40932	-0.58952	0.0034791	0.10938	1	RP1-63G5.5
310	piR-44545	hsa_piRNA_17526	DQ576433P	1.42015	0.92538	-0.58949	0.00149614	0.07374	1
782	piR-48688	hsa_piRNA_13383	DQ580576P	9.41939	6.06396	-0.58936	0.0075965	0.14842	1	TUBB,TUBBP2
556	piR-43648	hsa_piRNA_18423	DQ575536P	0.93517	0.62192	-0.58683	0.0042648	0.1172	1	NUTM2E,NUTM2A,NUTM2D,NUTM2A-AS1,NUTM2B-AS1,NUTM2B
586	piR-51369	hsa_piRNA_10702	DQ584257P	3.2778	2.18726	-0.58557	0.0047214	0.1231	1	CTC-559E9.12
50	piR-52410	hsa_piRNA_9661	DQ585298P	7.45168	4.94136	-0.58518	5.7085e-05	0.01744	0.8722
326	piR-35183	hsa_piRNA_26888	DQ597117P	43.3137	28.3024	-0.58412	0.00161891	0.07588	1
488	piR-45268	hsa_piRNA_16803	DQ577156P	34.4206	22.7776	-0.58332	0.0035154	0.11007	1	HIST2H2AA4,HIST1H2AJ,HIST2H2AC,HIST2H2BE,HIST2H2BE,HIST1H2AI,HIST2H2AA4
777	piR-37865	hsa_piRNA_24206	DQ599799P	3.1393	2.08877	-0.58256	0.0075205	0.14788	1	RP13-580B18.4,RP11-384K6.6,RP11-384K6.2
258	piR-30268	hsa_piRNA_31803	DQ570156P	1.45892	0.95805	-0.5815	0.00114186	0.06762	1	DPY19L2P2,RP5-1121E10.2,DPY19L2P4,DPY19L2P1,STEAP2-AS1
164	piR-51262	hsa_piRNA_10809	DQ584150P	2.63581	1.74599	-0.58124	0.00051664	0.04813	1	MGAT3
847	piR-44511	hsa_piRNA_17560	DQ576399P	14.7397	9.42207	-0.58061	0.0088592	0.15981	1	CTD-2054N24.1,DNM1P46,AC090825.1
726	piR-42327	hsa_piRNA_19744	DQ574215P	0.1967	0.13053	-0.58056	0.0067956	0.14302	1	KLHDC3
453	piR-32094	hsa_piRNA_29977	DQ581982P	4.47331	3.03484	-0.5804	0.0031608	0.10661	1	CSPG4P12,GOLGA2P10,GOLGA2P7,CSPG4P8
513	piR-47481	hsa_piRNA_14590	DQ579369P	16.1832	10.9765	-0.57978	0.0038041	0.1133	1
329	piR-52418	hsa_piRNA_9653	DQ585306P	45.5981	30.269	-0.57533	0.00167633	0.07785	1	KIF1B
362	piR-55067	hsa_piRNA_7004	DQ587955P	0.3802	0.25089	-0.57528	0.0020167	0.08512	1	IMPDH1,GRIN2A
309	piR-54344	hsa_piRNA_7727	DQ587232P	4.01315	2.71586	-0.57503	0.00148052	0.07321	1	RP11-146E13.4,C2orf27B,RP11-146E13.4,RP11-536C10.4,C2orf27A,NBEAP3
551	piR-43859	hsa_piRNA_18212	DQ575747P	0.23793	0.15312	-0.57436	0.0042416	0.11762	1
215	piR-47685	hsa_piRNA_14386	DQ579573P	212.862	140.131	-0.57227	0.00082116	0.05836	1	AP000350.10
284	piR-46654	hsa_piRNA_15417	DQ578542P	0.30829	0.2059	-0.57093	0.00132157	0.0711	1	RP3-468B3.2
196	piR-37442	hsa_piRNA_24629	DQ599376P	0.71814	0.48042	-0.56593	0.00068445	0.05336	1	MARCH8
639	piR-51275	hsa_piRNA_10796	DQ584163P	0.66315	0.43212	-0.5637	0.0054237	0.12968	1	RP11-528A10.1
100	piR-34284	hsa_piRNA_27787	DQ596218P	49.1514	33.4288	-0.56366	0.00021745	0.03322	1
277	piR-30927	hsa_piRNA_31144	DQ570815P	190.06	125.762	-0.56327	0.00125709	0.06934	1	RP5-867C24.1,RP11-183G22.1,CDC27
542	piR-54451	hsa_piRNA_7620	DQ587339P	3.57176	2.40945	-0.5629	0.0041445	0.11683	1	EPB41L4A-AS1,EPB41L4A
656	piR-34204	hsa_piRNA_27867	DQ596138P	3.65998	2.47935	-0.56263	0.0055808	0.12998	1	RP11-299H22.3
373	piR-31192	hsa_piRNA_30879	DQ571080P	442.013	302.769	-0.56021	0.0021806	0.08932	1	RP11-1082L8.2,LINC00964
867	piR-31075	hsa_piRNA_30996	DQ570963P	31.1585	20.2921	-0.55542	0.00926	0.16319	1
892	piR-50874	hsa_piRNA_11197	DQ583762P	4.40398	3.14914	-0.55501	0.0098215	0.16823	1	ZFP41,ZFP41
269	piR-31087	hsa_piRNA_30984	DQ570975P	92.1791	63.3537	-0.55498	0.001203	0.06833	1
64	piR-41087	hsa_piRNA_20984	DQ572975P	4.47279	3.03956	-0.55038	9.6374e-05	0.02301	1
652	piR-37258	hsa_piRNA_24813	DQ599192P	0.42242	0.28179	-0.55001	0.0055366	0.12974	1	CCT6A
71	piR-30373	hsa_piRNA_31698	DQ570261P	4.17556	2.81836	-0.54832	0.000116045	0.02497	1	LINC01016
163	piR-31219	hsa_piRNA_30852	DQ571107P	23.9103	16.2347	-0.54785	0.00051606	0.04837	1	RAI14
719	piR-37124	hsa_piRNA_24947	DQ599058P	3.27019	2.24059	-0.54582	0.0066973	0.14232	1	AC010240.2,AFF4,EEF1A1P10,EEF1A1P3,PAN3,EEF1A1P13,EEF1A1P7,STEAP1B,EEF1A1P6,EEF1A1P5,EEF1A1P28,EEF1A1P9,EEF1A1P22,EEF1A1P17,EEF1A1P11,RP11-553P9.1,TPK1
308	piR-39223	hsa_piRNA_22848	DQ601157P	10.6088	7.24563	-0.54411	0.00148018	0.07343	1
280	piR-46423	hsa_piRNA_15648	DQ578311P	1.68515	1.14592	-0.54329	0.00127681	0.06967	1	RP13-39P12.2
316	piR-35416	hsa_piRNA_26655	DQ597350P	3.03981	2.08832	-0.54324	0.00152444	0.07371	1
92	piR-35166	hsa_piRNA_26905	DQ597100P	20.3365	13.9492	-0.54192	0.000183413	0.03046	1	C12orf43
294	piR-36816	hsa_piRNA_25255	DQ598750P	0.46926	0.33007	-0.54138	0.00138044	0.07174	1	PLEKHB2,CYP4F62P,FAR2P4,CYP4F30P,FAR2P1
99	piR-46123	hsa_piRNA_15948	DQ578011P	2.15475	1.46842	-0.54119	0.00021614	0.03336	1	PRAME
565	piR-32639	hsa_piRNA_29432	DQ582527P	4.0996	2.78231	-0.53683	0.0043766	0.11835	1	RPS17
448	piR-57253	hsa_piRNA_4818	DQ590141P	0.36289	0.24727	-0.53635	0.0030791	0.10501	1	LINC00905
697	piR-54765	hsa_piRNA_7306	DQ587653P	71.1045	47.9004	-0.53487	0.0062381	0.13675	1
233	piR-40712	hsa_piRNA_21359	DQ572600P	71.6441	48.3832	-0.531	0.00093752	0.06148	1	LINC00930
273	piR-43355	hsa_piRNA_18716	DQ575243P	47.1555	32.0546	-0.52712	0.00122092	0.06833	1	BEND7
770	piR-30335	hsa_piRNA_31736	DQ570223P	1.64811	1.14639	-0.52659	0.007425	0.14733	1	SRPK1
330	piR-34527	hsa_piRNA_27544	DQ596461P	2.22796	1.53147	-0.52549	0.00168055	0.07781	1	TBC1D3P3,RP11-434D2.3,TBC1D3P4
376	piR-35331	hsa_piRNA_26740	DQ597265P	2.46915	1.70989	-0.52541	0.0022168	0.09008	1	C20orf27
692	piR-52200	hsa_piRNA_9871	DQ585088P	37.1041	25.7626	-0.52477	0.0061763	0.13637	1	EEF1A1P28,STEAP1B,EEF1A1P12,EEF1A1P10,EEF1A1P25,EEF1A1P5,TPK1,EEF1A1P22,EEF1A1P33,PIK3CB,EEF1A1,EEF1A1P6,EEF1A1P9
537	piR-57014	hsa_piRNA_5057	DQ589902P	1.25726	0.86281	-0.52225	0.0041165	0.11712	1	FAHD2CP,FAHD2B,FAHD2A
676	piR-34741	hsa_piRNA_27330	DQ596675P	266.543	190.509	-0.52197	0.0059766	0.13508	1	ELFN2,RP1-63G5.5
809	piR-58177	hsa_piRNA_3894	DQ591065P	0.39507	0.26287	-0.5212	0.0081204	0.15336	1
547	piR-42269	hsa_piRNA_19802	DQ574157P	0.99737	0.69387	-0.51981	0.0041781	0.1167	1	RP11-613M10.9,TMX2P1,SLC25A51
115	piR-30676	hsa_piRNA_31395	DQ570564P	31.1751	21.6901	-0.51534	0.00028041	0.03726	1	RP5-1029F21.3,RP5-1029F21.3,RP5-1029F21.3,RP5-1029F21.3,RP5-1029F21.3,RP5-1029F21.3
635	piR-51370	hsa_piRNA_10701	DQ584258P	4.34601	3.07177	-0.51474	0.0053818	0.12949	1
414	piR-35520	hsa_piRNA_26551	DQ597454P	3.92581	2.73181	-0.51278	0.0027376	0.10103	1	DNM1P47,DNM1P46,CTD-2054N24.1,GOLGA8VP
123	piR-50801	hsa_piRNA_11270	DQ583689P	1.57399	1.11305	-0.51231	0.00030293	0.03763	1
690	piR-47921	hsa_piRNA_14150	DQ579809P	0.4561	0.31538	-0.50612	0.0061445	0.13606	1	SNRNP35
327	piR-31026	hsa_piRNA_31045	DQ570914P	7.72059	5.42661	-0.5029	0.00162125	0.07575	1
315	piR-50759	hsa_piRNA_11312	DQ583647P	12.2579	8.5999	-0.50265	0.00151712	0.07359	1
500	piR-50197	hsa_piRNA_11874	DQ583085P	2.12628	1.52593	-0.50194	0.0035814	0.10944	1
274	piR-33815	hsa_piRNA_28256	DQ593703P	0.45212	0.31405	-0.5013	0.00122335	0.06822	1
781	piR-37820	hsa_piRNA_24251	DQ599754P	1.32872	0.9187	-0.49765	0.0075821	0.14833	1
386	piR-35836	hsa_piRNA_26235	DQ597770P	1.59811	1.10861	-0.49349	0.0023359	0.09246	1
301	piR-51371	hsa_piRNA_10700	DQ584259P	1.37426	0.97632	-0.49345	0.00142149	0.07216	1
220	piR-32336	hsa_piRNA_29735	DQ582224P	4.72757	3.3501	-0.49267	0.00084225	0.05849	1	CYP4F35P,CYP4F29P,ANKRD18A,RP11-392E22.12,FAM95B1,CYP4F26P,RP11-146D12.2
345	piR-40169	hsa_piRNA_21902	DQ572057P	1.46249	1.03	-0.4925	0.00183785	0.08139	1	ZNF546
198	piR-38436	hsa_piRNA_23635	DQ600370P	81.3064	57.3246	-0.49094	0.0007008	0.05408	1
202	piR-47472	hsa_piRNA_14599	DQ579360P	0.25916	0.18418	-0.49075	0.00073583	0.05566	1	DCHS1
600	piR-43316	hsa_piRNA_18755	DQ575204P	3.24317	2.29317	-0.49065	0.0048968	0.1247	1	RHNO1,TULP3
584	piR-43662	hsa_piRNA_18409	DQ575550P	1.15043	0.76976	-0.4904	0.0046983	0.12292	1	LINC01016
204	piR-56008	hsa_piRNA_6063	DQ588896P	33.4697	23.7751	-0.4895	0.00076329	0.05717	1
578	piR-39832	hsa_piRNA_22239	DQ601766P	30.0162	21.7281	-0.48836	0.0045954	0.12148	1	NPIPB3,NPIPB4,NPIPB5,NPIPA3,SLC35G4P,PDXDC2P
452	piR-32926	hsa_piRNA_29145	DQ582814P	0.51184	0.36624	-0.48788	0.0031582	0.10676	1	AC093838.4,SMPD4
271	piR-50948	hsa_piRNA_11123	DQ583836P	6.03471	4.30169	-0.4875	0.00121757	0.06865	1	EIF5AL1,EIF5AP4,EIF5A
498	piR-53550	hsa_piRNA_8521	DQ586438P	0.50605	0.35909	-0.48683	0.0035556	0.10909	1	CTC-523E23.4
497	piR-51852	hsa_piRNA_10219	DQ584740P	22.9908	16.3498	-0.48537	0.0035435	0.10894	1
640	piR-58344	hsa_piRNA_3727	DQ591232P	1.57446	1.13026	-0.48524	0.0054374	0.12981	1	RP11-434D2.10
313	piR-57880	hsa_piRNA_4191	DQ590768P	1.57468	1.13476	-0.48391	0.0015001	0.07323	1	LINC00964,RP11-1082L8.2
126	piR-33853	hsa_piRNA_28218	DQ593741P	17.0909	12.1805	-0.48251	0.00032015	0.03882	1	RP11-438J1.1,TATDN2
518	piR-34659	hsa_piRNA_27412	DQ596593P	31.8836	22.4293	-0.4822	0.0039025	0.11511	1	DDX6
894	piR-38933	hsa_piRNA_23138	DQ600867P	50.3259	36.1529	-0.47831	0.0099175	0.1695	1
350	piR-34169	hsa_piRNA_27902	DQ596103P	0.85098	0.61559	-0.47825	0.00187611	0.0819	1
606	piR-57210	hsa_piRNA_4861	DQ590098P	0.82434	0.591	-0.47494	0.0049626	0.12512	1	ST7L,WNT2B
74	piR-34339	hsa_piRNA_27732	DQ596273P	7.87363	5.64866	-0.47353	0.000117938	0.02435	1	RP11-438J1.1,TATDN2
250	piR-57508	hsa_piRNA_4563	DQ590396P	2.20877	1.59706	-0.47273	0.00104484	0.06386	1
365	piR-32093	hsa_piRNA_29978	DQ581981P	1.53657	1.08243	-0.47085	0.0020596	0.08622	1	RP11-146D12.2
552	piR-56289	hsa_piRNA_5782	DQ589177P	0.95649	0.69655	-0.47072	0.0042427	0.11744	1
172	piR-37461	hsa_piRNA_24610	DQ599395P	57.0957	41.0378	-0.47024	0.00055935	0.04969	1	VASH1,RP11-488C13.5
247	piR-54098	hsa_piRNA_7973	DQ586986P	4.67279	3.33102	-0.47006	0.0010379	0.0642	1	EIF5AL1,EIF5AP4
400	piR-53630	hsa_piRNA_8441	DQ586518P	13.1961	9.44608	-0.46954	0.002517	0.09614	1	NPAP1P6
374	piR-60815	hsa_piRNA_1256	DQ594703P	117.897	85.4557	-0.46924	0.0021838	0.08921	1	IGF1R,RP11-654A16.3
689	piR-30363	hsa_piRNA_31708	DQ570251P	8.77892	6.50151	-0.46907	0.0061414	0.13619	1	RERE
221	piR-43887	hsa_piRNA_18184	DQ575775P	1.83116	1.32117	-0.46741	0.00084257	0.05825	1	H2AFJ
436	piR-57080	hsa_piRNA_4991	DQ589968P	1.03865	0.74713	-0.46615	0.0029973	0.10504	1	CBFA2T2
811	piR-60165	hsa_piRNA_1906	DQ594053P	1.55061	1.12246	-0.46581	0.0081573	0.15368	1	ZSCAN25
356	piR-50743	hsa_piRNA_11328	DQ583631P	0.59847	0.43147	-0.46442	0.00194035	0.08328	1	PIK3IP1
684	piR-36532	hsa_piRNA_25539	DQ598466P	15.1446	10.8832	-0.46421	0.0060764	0.13573	1	LINC00930,LINC00930
358	piR-53461	hsa_piRNA_8610	DQ586349P	24.4246	17.7335	-0.46318	0.00196457	0.08385	1	DNM1P47,GOLGA8VP
395	piR-32922	hsa_piRNA_29149	DQ582810P	2.44336	1.76609	-0.46181	0.0024555	0.09498	1	LINC01015
813	piR-50484	hsa_piRNA_11587	DQ583372P	2.71374	1.94778	-0.45853	0.0081647	0.15344	1	TUB
831	piR-61881	hsa_piRNA_190	DQ595769P	3.23224	2.38902	-0.45783	0.0084812	0.15594	1	RP11-266O8.1
554	piR-41081	hsa_piRNA_20990	DQ572969P	3.32271	2.426	-0.45648	0.004258	0.11743	1
724	piR-47161	hsa_piRNA_14910	DQ579049P	36.9097	27.1309	-0.45596	0.0067557	0.14257	1	FTH1P21,FTH1P11,RP11-257P3.3,FTH1P2,BEST1,FTH1,RSF1,FTH1P12,FTH1P16
816	piR-54223	hsa_piRNA_7848	DQ587111P	2.48756	1.79388	-0.45543	0.0082823	0.15508	1	RP11-603B24.2
645	piR-31233	hsa_piRNA_30838	DQ571121P	1.07533	0.77788	-0.45479	0.0054816	0.12985	1	RP11-299H22.3
505	piR-50824	hsa_piRNA_11247	DQ583712P	211.105	155.138	-0.45475	0.0036563	0.11062	1	RP11-1082L8.2,LINC00964
863	piR-59262	hsa_piRNA_2809	DQ592150P	7.9577	5.77418	-0.45454	0.009162	0.16221	1	AC018462.2,RPSA,RP11-556K13.1,RP11-255H23.2,RP11-254B13.1,COMMD1,RPSAP58,AC018462.3,RP11-255H23.4
791	piR-32992	hsa_piRNA_29079	DQ582880P	0.6356	0.4663	-0.45413	0.0078422	0.15148	1	TCEB3,TCEB3-AS1
477	piR-46359	hsa_piRNA_15712	DQ578247P	0.31109	0.22325	-0.45023	0.003376	0.10814	1	CTC-523E23.6
404	piR-42059	hsa_piRNA_20012	DQ573947P	0.36651	0.2672	-0.44866	0.0025605	0.09684	1	RPL7P21,CTC-347C20.1,CLEC16A,RPL7P46,NR3C1,RPL7L1,RPL7P22,RPL7L1P9
84	piR-61550	hsa_piRNA_521	DQ595438P	1.42774	1.04528	-0.4478	0.000156973	0.02855	1	RP11-299H22.3
510	piR-33814	hsa_piRNA_28257	DQ593702P	0.99527	0.71871	-0.44565	0.0037205	0.11146	1
232	piR-42625	hsa_piRNA_19446	DQ574513P	15.5917	11.3292	-0.44519	0.00092158	0.06069	1	ERBB2IP,RP11-114H23.1,SPATA5,STAG1,HUS1,GPR89B,FIGNL1,DDC,EGLN3,CTB-180A7.3,RP11-308D16.2,CEP44,OCLN,FUCA1,AC004448.5,ANKRD28
567	piR-41603	hsa_piRNA_20468	DQ573491P	1.82239	1.33062	-0.44256	0.004462	0.12024	1	SLC25A51,TMX2-CTNND1,RP11-613M10.9,TMX2,TMX2P1
530	piR-54928	hsa_piRNA_7143	DQ587816P	1.24543	0.90143	-0.44241	0.0040642	0.11716	1	ASB1
67	piR-50760	hsa_piRNA_11311	DQ583648P	8.87631	6.52724	-0.44099	0.000102005	0.02326	1
765	piR-38697	hsa_piRNA_23374	DQ600631P	3.28983	2.41111	-0.44038	0.0073984	0.14776	1	GOLGA2P11
246	piR-34000	hsa_piRNA_28071	DQ593888P	3.62759	2.65601	-0.43901	0.00102188	0.06347	1	EIF5AL1,EIF5AP4
357	piR-40494	hsa_piRNA_21577	DQ572382P	4.21713	3.10152	-0.43575	0.00194143	0.08309	1	TMEM150C,RP11-146N23.1,RPS6,RP11-791G16.2,RP11-392P7.1
77	piR-36722	hsa_piRNA_25349	DQ598656P	2.71448	2.00925	-0.43446	0.000120204	0.02385	1
846	piR-36638	hsa_piRNA_25433	DQ598572P	5.34503	3.95525	-0.43268	0.0088439	0.15972	1
349	piR-54217	hsa_piRNA_7854	DQ587105P	10.6201	7.85426	-0.42909	0.00187564	0.08211	1
714	piR-56682	hsa_piRNA_5389	DQ589570P	11.5625	8.49822	-0.42717	0.0065975	0.14118	1
267	piR-53853	hsa_piRNA_8218	DQ586741P	10.361	7.74303	-0.4244	0.00119852	0.06858	1	EEF1A1P4,EEF1A1P6,EEF1A1P19,EEF1A1,C5orf34,EEF1A1P5,RP11-159F24.3,AEBP2,TPK1,STEAP1B,EEF1A1P10,EEF1A1P12
177	piR-30834	hsa_piRNA_31237	DQ570722P	16.4908	12.1975	-0.4231	0.00059676	0.05151	1	RP11-386M24.9
610	piR-41454	hsa_piRNA_20617	DQ573342P	0.2913	0.22674	-0.42108	0.0050192	0.12572	1
450	piR-42718	hsa_piRNA_19353	DQ574606P	0.6307	0.46833	-0.42074	0.0030995	0.10524	1	NUTM2A,NUTM2A-AS1,NUTM2D,NUTM2E,NUTM2B,NUTM2B-AS1
601	piR-39658	hsa_piRNA_22413	DQ601592P	30.0616	22.4064	-0.42037	0.0049006	0.12459	1	RP1-63G5.5
205	piR-56603	hsa_piRNA_5468	DQ589491P	0.57012	0.42261	-0.42025	0.00076483	0.057	1	RP11-1082L8.2,LINC00964
311	piR-54955	hsa_piRNA_7116	DQ587843P	42.7558	31.7846	-0.41989	0.00149777	0.07358	1	RP3-468B3.2
57	piR-38457	hsa_piRNA_23614	DQ600391P	0.54487	0.40814	-0.41958	7.6877e-05	0.02061	1	GAS1
242	piR-34637	hsa_piRNA_27434	DQ596571P	29.2668	21.7382	-0.41899	0.00098284	0.06205	1	NUTM2A,NUTM2D,NUTM2B,NUTM2A-AS1,NUTM2B-AS1,NUTM2E,NUTM2HP
595	piR-52677	hsa_piRNA_9394	DQ585565P	1.0991	0.82195	-0.41872	0.0048214	0.12381	1	RGAG4
651	piR-51968	hsa_piRNA_10103	DQ584856P	0.34848	0.26031	-0.41583	0.0055355	0.12992	1	RP11-849H4.2,AC007040.8,RP11-849H4.2
786	piR-52423	hsa_piRNA_9648	DQ585311P	4.31742	3.22027	-0.41549	0.0076791	0.14927	1	RP11-255H23.4,RP11-255H23.2,RP11-254B13.1,RPSA,RP11-350G8.4,RPSAP58,RP11-350G8.3
218	piR-30337	hsa_piRNA_31734	DQ570225P	2.29785	1.7107	-0.41403	0.00083725	0.05868	1
797	piR-39794	hsa_piRNA_22277	DQ601728P	245.764	184.13	-0.41355	0.0079362	0.15214	1	ZNF701,CTD-3099C6.7
553	piR-54150	hsa_piRNA_7921	DQ587038P	1.08327	0.8006	-0.41349	0.0042427	0.11722	1	NPIPA1,NPIPA3,RP11-958N24.1,RP11-1212A22.1,PKD1P1,NPIPA7
769	piR-60128	hsa_piRNA_1943	DQ594016P	0.71746	0.54046	-0.41329	0.0074218	0.14746	1
599	piR-32330	hsa_piRNA_29741	DQ582218P	2.28885	1.70575	-0.41233	0.0048621	0.12402	1	SBNO1
699	piR-30857	hsa_piRNA_31214	DQ570745P	1.01284	0.75586	-0.41221	0.0062762	0.13719	1
768	piR-48575	hsa_piRNA_13496	DQ580463P	2.59055	1.94089	-0.41165	0.007421	0.14764	1
870	piR-35127	hsa_piRNA_26944	DQ597061P	4.97291	3.78555	-0.40906	0.009338	0.16399	1	RP3-468B3.2
733	piR-48179	hsa_piRNA_13892	DQ580067P	11.4359	8.61305	-0.40848	0.0068787	0.14338	1
711	piR-57301	hsa_piRNA_4770	DQ590189P	1.11822	0.83483	-0.40522	0.0065767	0.14133	1
197	piR-42735	hsa_piRNA_19336	DQ574623P	4.09436	3.09499	-0.40413	0.00068463	0.0531	1	RP3-468B3.2
425	piR-60030	hsa_piRNA_2041	DQ593918P	7.42294	5.53063	-0.40365	0.0028424	0.10219	1	NUP98
668	piR-53679	hsa_piRNA_8392	DQ586567P	20.0593	15.131	-0.40284	0.0058776	0.13444	1
231	piR-31464	hsa_piRNA_30607	DQ571352P	17.2811	13.0819	-0.39925	0.00092134	0.06094	1	LIMK2
585	piR-57604	hsa_piRNA_4467	DQ590492P	10.6945	8.14335	-0.39856	0.0047014	0.12279	1	EEF1A1P5,STEAP1B,EEF1A1P6,EEF1A1,EEF1A1P29,DACH2
421	piR-38005	hsa_piRNA_24066	DQ599939P	8.10969	6.05713	-0.39676	0.0028036	0.10175	1	LACTB,ZNF665,KDM3B,ASMTL,KALP,SGCZ,CTD-2521M24.9,AC010642.1,RPS4Y1,ZNF846,TXNRD1,SPAG16,AC006115.3,ZFP30,EPHA6,PTGES2-AS1,RP13-210D15.1,EGFEM1P,EFCAB5,PNPLA7,ZNF525,PSG6,ARHGAP26,TRIP13,ANKRD26P1,ERVK3-1,ZNF781,BUD31,LLNLF-65H9.1,USP6NL,LSS,CTD-3131K8.2,AC008984.2,SLCO1B3,STAG2,VPS13C,ZNF665,MITF,ASMTL,CTC-459F4.3,PTPRN2,TPK1,SLC27A1,CTD-2292P10.4,RP11-132A1.4,SLCO1B3,PSG7,HPSE2,MVB12A
895	piR-35277	hsa_piRNA_26794	DQ597211P	1.24862	0.92499	-0.39265	0.0099181	0.16932	1	ZCCHC4
544	piR-46860	hsa_piRNA_15211	DQ578748P	8.33347	6.37794	-0.39252	0.0041641	0.11695	1
344	piR-42608	hsa_piRNA_19463	DQ574496P	1.54535	1.16707	-0.39207	0.00182462	0.08104	1	LINC00882,RP11-52L11.7
557	piR-36780	hsa_piRNA_25291	DQ598714P	0.56612	0.42883	-0.39197	0.0042648	0.11699	1	CTC-559E9.4,ZNF506,CTC-559E9.6
151	piR-31286	hsa_piRNA_30785	DQ571174P	2.12871	1.62253	-0.39065	0.00044321	0.04485	1	RP11-510I6.2,RPL18P13,RP11-150D5.2,RPL18
73	piR-61023	hsa_piRNA_1048	DQ594911P	18.9886	14.468	-0.39034	0.0001171	0.02451	1
677	piR-38863	hsa_piRNA_23208	DQ600797P	21.8371	16.4326	-0.39009	0.0059776	0.13491	1	RP11-366O20.5
764	piR-33531	hsa_piRNA_28540	DQ593419P	11.4285	8.63925	-0.38916	0.0073965	0.14792	1
407	piR-34044	hsa_piRNA_28027	DQ595978P	8.87192	6.74533	-0.38902	0.0025996	0.09759	1	CYP20A1
653	piR-40069	hsa_piRNA_22002	DQ571957P	5.18457	3.90198	-0.38882	0.0055562	0.13	1
208	piR-50467	hsa_piRNA_11604	DQ583355P	1.40674	1.07062	-0.38852	0.00078354	0.05756	1	CACNA1B
363	piR-52464	hsa_piRNA_9607	DQ585352P	1.35676	1.0381	-0.38742	0.0020428	0.08598	1
31	piR-44193	hsa_piRNA_17878	DQ576081P	1.10358	0.84133	-0.38737	2.2561e-05	0.01112	0.34471	RP1-63G5.5
795	piR-58037	hsa_piRNA_4034	DQ590925P	0.42814	0.32772	-0.38705	0.0079159	0.15213	1	NBPF25P,NBPF9,NOTCH2NL,NBPF12,NBPF9,NBPF14,NBPF11
845	piR-41034	hsa_piRNA_21037	DQ572922P	5.71027	4.38007	-0.38665	0.0088179	0.15944	1	RP11-386M24.9
674	piR-37409	hsa_piRNA_24662	DQ599343P	0.66467	0.50336	-0.38549	0.0059603	0.13511	1	RP11-143J24.1,CTD-2022H16.3
276	piR-56095	hsa_piRNA_5976	DQ588983P	12.4131	9.47629	-0.3851	0.00123644	0.06845	1	FAM225A,FAM225B
759	piR-30969	hsa_piRNA_31102	DQ570857P	0.65084	0.49782	-0.38507	0.0073231	0.14742	1	PHKB
591	piR-55748	hsa_piRNA_6323	DQ588636P	3.50117	2.67265	-0.38466	0.0047813	0.12361	1
105	piR-31663	hsa_piRNA_30408	DQ571551P	1.95061	1.49397	-0.3826	0.00024118	0.0351	1	RP11-753D20.1
111	piR-34544	hsa_piRNA_27527	DQ596478P	36.5016	28.0129	-0.38223	0.00026275	0.03617	1
824	piR-30704	hsa_piRNA_31367	DQ570592P	4.15798	3.16172	-0.38198	0.0083963	0.15569	1	RP13-39P12.2
529	piR-41774	hsa_piRNA_20297	DQ573662P	8.15541	6.21422	-0.38014	0.0040641	0.11738	1	LINC00837
707	piR-55709	hsa_piRNA_6362	DQ588597P	16.437	12.4903	-0.37998	0.0064807	0.14005	1	ALX3,RP4-773N10.4,STRIP1
817	piR-32204	hsa_piRNA_29867	DQ582092P	0.89146	0.67831	-0.37873	0.0082955	0.15514	1	RP1-37N7.5,RP11-434D2.11,EVPLL
695	piR-44399	hsa_piRNA_17672	DQ576287P	2.08314	1.60689	-0.37862	0.0061966	0.13623	1	FAM225A,FAM225B
295	piR-37943	hsa_piRNA_24128	DQ599877P	0.74133	0.56142	-0.37826	0.00138433	0.0717	1	IQCJ-SCHIP1,IQCJ
401	piR-46911	hsa_piRNA_15160	DQ578799P	0.19075	0.14756	-0.37659	0.0025176	0.09593	1	IL16
801	piR-59001	hsa_piRNA_3070	DQ591889P	3.54715	2.7142	-0.37582	0.0080023	0.15264	1	ZNF252P
603	piR-47615	hsa_piRNA_14456	DQ579503P	8.19047	6.20789	-0.37195	0.0049183	0.12462	1
212	piR-46163	hsa_piRNA_15908	DQ578051P	7.449	5.72661	-0.37174	0.00080395	0.05794	1	CYP19A1,RP11-108K3.1
533	piR-49248	hsa_piRNA_12823	DQ581136P	73.1089	56.4068	-0.36528	0.0041016	0.11758	1
368	piR-31981	hsa_piRNA_30090	DQ571869P	0.43058	0.3294	-0.36505	0.0020977	0.08709	1	CTC-559E9.9
403	piR-49028	hsa_piRNA_13043	DQ580916P	37.6273	29.184	-0.36427	0.0025231	0.09566	1
413	piR-48948	hsa_piRNA_13123	DQ580836P	45.6523	35.3051	-0.36397	0.002722	0.1007	1	NPAP1P6
755	piR-30109	hsa_piRNA_31962	DQ569997P	3.53344	2.68651	-0.36311	0.0072771	0.14727	1	CTC-559E9.9
199	piR-54752	hsa_piRNA_7319	DQ587640P	39.7558	31.0615	-0.36239	0.00071749	0.05509	1
852	piR-35521	hsa_piRNA_26550	DQ597455P	1.83289	1.41063	-0.36237	0.0089432	0.16038	1	GOLGA8VP,CTD-2054N24.1,DNM1P46,DNM1P47
475	piR-43130	hsa_piRNA_18941	DQ575018P	1.86637	1.46001	-0.36106	0.0033596	0.10807	1	RP4-669L17.10,RP11-274B21.2,AC138035.2,LINC01001,FAM157C,RP13-580B18.4,RP11-304M2.3,RP11-384K6.6,LINC01002,RP11-356C4.5
514	piR-50866	hsa_piRNA_11205	DQ583754P	6.27737	4.82355	-0.3606	0.0038202	0.11356	1
886	piR-52166	hsa_piRNA_9905	DQ585054P	0.64	0.48804	-0.35969	0.0096758	0.16686	1	NSD1,PRMT1P1
747	piR-49363	hsa_piRNA_12708	DQ581251P	0.40944	0.31743	-0.35949	0.0071588	0.14642	1	POM121L1P
570	piR-37349	hsa_piRNA_24722	DQ599283P	81.1889	63.5494	-0.35659	0.0044833	0.12018	1	CYP19A1
380	piR-38256	hsa_piRNA_23815	DQ600190P	5.74115	4.44901	-0.35579	0.0022627	0.09098	1	AC073071.1,ANKRD18CP,MIR99AHG,CNTNAP2,PMM2,CTD-2047H16.4,RP11-498P14.5,RP11-380P13.1,ERVH-1
555	piR-49805	hsa_piRNA_12266	DQ581693P	0.76214	0.58899	-0.35516	0.0042582	0.11723	1
545	piR-38432	hsa_piRNA_23639	DQ600366P	2.19212	1.71906	-0.3551	0.0041759	0.11707	1
268	piR-50367	hsa_piRNA_11704	DQ583255P	1.6082	1.26066	-0.35495	0.00119869	0.06834	1
370	piR-38755	hsa_piRNA_23316	DQ600689P	3.18205	2.46736	-0.35454	0.0021249	0.08775	1	RPL27A,RP11-475C16.1,RP11-306O13.1
82	piR-30436	hsa_piRNA_31635	DQ570324P	22.3093	17.3794	-0.35451	0.000142663	0.02658	1	CTC-523E23.6
859	piR-60164	hsa_piRNA_1907	DQ594052P	0.84626	0.65658	-0.35419	0.0091159	0.16214	1
575	piR-48523	hsa_piRNA_13548	DQ580411P	0.65414	0.50731	-0.35393	0.004537	0.12056	1
588	piR-36009	hsa_piRNA_26062	DQ597943P	40.9194	31.5079	-0.35056	0.004755	0.12356	1	RP11-753D20.1
604	piR-38062	hsa_piRNA_24009	DQ599996P	4.54004	3.5294	-0.35003	0.0049387	0.12493	1	RP13-39P12.2,ATAD2,IMPDH1P6
451	piR-56108	hsa_piRNA_5963	DQ588996P	7.12541	5.55955	-0.34739	0.0031205	0.10572	1
729	piR-42841	hsa_piRNA_19230	DQ574729P	0.81611	0.63618	-0.34713	0.0068431	0.14342	1
40	piR-44593	hsa_piRNA_17478	DQ576481P	6.50402	5.12092	-0.34651	3.7975e-05	0.01451	0.58022	FGD4
101	piR-37129	hsa_piRNA_24941	DQ599063P	3.87348	3.00595	-0.3463	0.00022187	0.03356	1
897	piR-58132	hsa_piRNA_3939	DQ591020P	0.88577	0.69054	-0.34628	0.009945	0.1694	1
829	piR-47535	hsa_piRNA_14536	DQ579423P	1.04611	0.82365	-0.34428	0.0084614	0.15595	1
324	piR-42811	hsa_piRNA_19260	DQ574699P	27.1777	21.275	-0.34346	0.00161763	0.07628	1	RIN3
784	piR-34599	hsa_piRNA_27472	DQ596533P	3.64515	2.85498	-0.34122	0.00766	0.14928	1	TBC1D3B,CTB-91J4.1,TBC1D3B,TBC1D3F,CH17-129M10.1,TBC1D3H,TBC1D3,TBC1D3H,TBC1D3,TBC1D3H,TBC1D3,TBC1D3
832	piR-45381	hsa_piRNA_16690	DQ577269P	34.8826	27.2182	-0.34054	0.0085602	0.1572	1
780	piR-48751	hsa_piRNA_13320	DQ580639P	3.60096	2.81885	-0.34048	0.0075608	0.1481	1	LINC00837
473	piR-61773	hsa_piRNA_298	DQ595661P	24.7163	19.2784	-0.33973	0.0033244	0.10739	1	DNM1P47,DNM1P47,DNM1P47,DNM1P47,DNM1P47,DNM1P47,DNM1P47,DNM1P47,DNM1P47,DNM1P47,DNM1P47,DNM1P47,DNM1P47,DNM1P47,DNM1P47,DNM1P47,DNM1P47,DNM1P47
649	piR-56066	hsa_piRNA_6005	DQ588954P	13.0512	10.0768	-0.33761	0.0055226	0.13002	1	ZNF397
469	piR-41011	hsa_piRNA_21060	DQ572899P	4.84754	3.80146	-0.3376	0.0033023	0.10758	1	ZNF324B
516	piR-42531	hsa_piRNA_19540	DQ574419P	0.59263	0.46486	-0.33494	0.0038828	0.11497	1	AC114730.8,D2HGDH
665	piR-54359	hsa_piRNA_7712	DQ587247P	0.95775	0.75498	-0.3339	0.0057823	0.13285	1
834	piR-42913	hsa_piRNA_19158	DQ574801P	1.81883	1.42851	-0.33352	0.0085763	0.15712	1
675	piR-51643	hsa_piRNA_10428	DQ584531P	0.39629	0.30494	-0.33345	0.0059618	0.13495	1
283	piR-56101	hsa_piRNA_5970	DQ588989P	0.76679	0.60894	-0.33057	0.00131683	0.07109	1	RGMA,RP11-368J22.2,YBX2
848	piR-34957	hsa_piRNA_27114	DQ596891P	9.67229	7.71232	-0.32741	0.0088953	0.16027	1	CTD-2054N24.1,DNM1P46
181	piR-35146	hsa_piRNA_26925	DQ597080P	9.70604	7.65839	-0.32662	0.00061711	0.05209	1
762	piR-58944	hsa_piRNA_3127	DQ591832P	270.6	216.083	-0.32548	0.0073612	0.1476	1	DNM1P47,GOLGA8VP
880	piR-48970	hsa_piRNA_13101	DQ580858P	53.0386	42.5191	-0.32467	0.0095647	0.16607	1	LINC00837
579	piR-31358	hsa_piRNA_30713	DQ571246P	8.1151	6.45813	-0.32434	0.0046034	0.12148	1	LINC01015
632	piR-57193	hsa_piRNA_4878	DQ590081P	10.5441	8.38166	-0.32198	0.0053422	0.12915	1	RP3-468B3.2
626	piR-54041	hsa_piRNA_8030	DQ586929P	0.99641	0.79329	-0.32177	0.0052234	0.12749	1	RP11-434D2.3,TBC1D3P3,TBC1D3P4
843	piR-30576	hsa_piRNA_31495	DQ570464P	1.45471	1.15901	-0.32153	0.0087959	0.15942	1	DNM1P46,DNM1P47,RP11-1H8.6
693	piR-54230	hsa_piRNA_7841	DQ587118P	8.13347	6.37246	-0.32036	0.0061814	0.13629	1	DNM1P47,DNM1P47,DNM1P47,DNM1P47,DNM1P47,DNM1P47,DNM1P47,DNM1P47,DNM1P47,DNM1P47,DNM1P47
149	piR-57649	hsa_piRNA_4422	DQ590537P	6.84809	5.46786	-0.31955	0.00043535	0.04464	1	RP13-580B18.4,AC005077.12
628	piR-61384	hsa_piRNA_687	DQ595272P	26.0507	20.8265	-0.31846	0.0052648	0.12809	1	ILF3-AS1
112	piR-56096	hsa_piRNA_5975	DQ588984P	25.1264	20.099	-0.31663	0.00026357	0.03596	1	FAM225B,FAM225A
629	piR-39560	hsa_piRNA_22511	DQ601494P	1.562	1.23951	-0.31657	0.0052826	0.12832	1
222	piR-58972	hsa_piRNA_3099	DQ591860P	4.66784	3.7466	-0.31497	0.00084342	0.05805	1	RP11-266O8.1,RP11-164C12.2
102	piR-40848	hsa_piRNA_21223	DQ572736P	3.95833	3.18469	-0.31355	0.00022286	0.03338	1
318	piR-55381	hsa_piRNA_6690	DQ588269P	0.67371	0.54482	-0.31028	0.00157627	0.07574	1
888	piR-44863	hsa_piRNA_17208	DQ576751P	0.34945	0.28124	-0.30874	0.0097032	0.16695	1	CYP19A1,RP11-108K3.1
285	piR-61290	hsa_piRNA_781	DQ595178P	5.41127	4.32889	-0.30832	0.00133529	0.07159	1	F11R
789	piR-41754	hsa_piRNA_20317	DQ573642P	2.20884	1.81484	-0.30615	0.0077421	0.14993	1	CYP19A1
142	piR-32809	hsa_piRNA_29262	DQ582697P	7.40093	5.97766	-0.30613	0.00041752	0.04492	1	LINC00930
704	piR-32927	hsa_piRNA_29144	DQ582815P	0.6866	0.55716	-0.30601	0.0063607	0.13805	1	RP11-122G18.7,RPS2P1,RP3-342P20.2,GAB1,NUCB2,RP11-452G18.2,RP11-192C21.1,RP11-296A18.5,AC022210.2,RPS2P6,RNF11,MFSD2A,INVS,RP11-364L4.1,ZNF44,RPS2P55,RPS2P4,RPS2P7,RPS2P35,CTD-2666L21.2
672	piR-34790	hsa_piRNA_27281	DQ596724P	9.26567	7.35596	-0.30506	0.0059205	0.13461	1
749	piR-43544	hsa_piRNA_18527	DQ575432P	1.15519	0.93779	-0.3019	0.0071822	0.14651	1
431	piR-50385	hsa_piRNA_11686	DQ583273P	3.2463	2.61713	-0.30177	0.0028832	0.10221	1	RP11-57A19.4,EIF3CL,EIF3C
862	piR-56431	hsa_piRNA_5640	DQ589319P	0.30374	0.24915	-0.30169	0.0091611	0.16238	1	RP11-266O8.1
58	piR-39972	hsa_piRNA_22099	DQ601906P	5.74146	4.67216	-0.29854	7.9912e-05	0.02105	1	RPL7AP8,RPL7AP66,RPL7AP10,RP11-204K16.1,TMEM150C,POLQ,SMOC1,DOCK4,RPL7AP3,HECTD4,RP11-410C4.1,SEMA6D,PTP4A1,KIAA0391,CTD-2270N23.1,RPL7AP6,RP11-534L20.4,KB-1582A10.1,RASSF5,RPL7AP34,KIAA0391,RPL7AP60,AC003080.4,RPL7AP11,OFCC1,RPL7A,ZNF431,RP11-84O12.2,AC000089.3,RPL7AP26,RP11-170M17.1,AC004129.9,RAD51B,GNB1L,RP11-242C24.2,RP3-486D24.1,RP11-170M17.2,LINC00669
394	piR-51546	hsa_piRNA_10525	DQ584434P	14.7328	12.0677	-0.29763	0.0024407	0.09465	1	ZBTB4
541	piR-30940	hsa_piRNA_31131	DQ570828P	11.7896	9.55118	-0.29682	0.0041368	0.11683	1	ARHGEF4
238	piR-32403	hsa_piRNA_29668	DQ582291P	8.31227	6.77846	-0.29335	0.00095864	0.06154	1	AGAP6,AGAP6,CTGLF10P,AGAP4,AC244230.1,CTGLF12P,AGAP5,AGAP10,RP11-109G10.1,RP11-464F9.1,AC244230.1
262	piR-43660	hsa_piRNA_18411	DQ575548P	25.9289	21.1396	-0.29309	0.00116087	0.0677	1	LINC01016
160	piR-57300	hsa_piRNA_4771	DQ590188P	1.23166	1.00352	-0.29132	0.0004984	0.04759	1	TMX2P1,RP11-613M10.9,SLC25A51,TMX2-CTNND1,TMX2
443	piR-41487	hsa_piRNA_20584	DQ573375P	3.41765	2.78523	-0.29073	0.0030602	0.10555	1
493	piR-53712	hsa_piRNA_8359	DQ586600P	5.10782	4.14676	-0.29063	0.0035357	0.10958	1	CYP19A1,RP11-108K3.1
828	piR-43258	hsa_piRNA_18813	DQ575146P	5.57484	4.53391	-0.29057	0.0084555	0.15603	1	ZFYVE19
531	piR-54925	hsa_piRNA_7146	DQ587813P	0.44363	0.3617	-0.29017	0.0040762	0.11729	1	RP11-430C7.5,LRRN2
225	piR-54228	hsa_piRNA_7843	DQ587116P	30.3928	24.8456	-0.28918	0.00088218	0.05991	1	DNM1P47,DNM1P47,DNM1P47,DNM1P47,DNM1P47,DNM1P47
396	piR-41975	hsa_piRNA_20096	DQ573863P	2.07704	1.69107	-0.28898	0.0024815	0.09574	1	DNM1P47,DNM1P47,DNM1P47,DNM1P47,DNM1P47,DNM1P47,DNM1P47,DNM1P47,DNM1P47,DNM1P47,DNM1P47
334	piR-54515	hsa_piRNA_7556	DQ587403P	2.65872	2.1676	-0.28887	0.00172437	0.07888	1
611	piR-58544	hsa_piRNA_3527	DQ591432P	2.65119	2.16467	-0.28851	0.0050352	0.12591	1	CTC-523E23.4
830	piR-30597	hsa_piRNA_31474	DQ570485P	3.89744	3.19679	-0.28763	0.0084781	0.15607	1	RP1-292B18.1,MTHFD1L,AC004453.8,RP1-292B18.4,CAND2,RPL32,NUDCD3
738	piR-41245	hsa_piRNA_20826	DQ573133P	4.55854	3.75366	-0.28715	0.0069196	0.14326	1	DAB1,ENPP7P2,TMEFF2,ZNF827,RP11-266A24.1,RP11-380P13.1,AC002066.1,ERVH-1,HHLA2,ZNF827,PLB1,RP11-498P14.5,PKHD1,RP5-945F2.3,S100Z,C6orf99,ITGB3BP,AP002954.4,BCL7C,RYR2,USH2A,RP11-33N16.3,BFSP2-AS1,BFSP2,LINC01356,RP11-249M12.2,A2ML1-AS1,RP1-41C23.1,RP11-732M18.4,ARFIP1,TPH2,SNX9,KCNE4,CCL26,CSMD1,CASP10,LINC01399,NSUN6,SPG20,LINC00964,RP11-415G4.1,HMCN1,CACNA2D3,LINC00678,CAV2,HMCN1,DMD,MGC32805,A…
844	piR-47607	hsa_piRNA_14464	DQ579495P	4.75612	3.87344	-0.2863	0.0088028	0.15936	1
152	piR-54742	hsa_piRNA_7329	DQ587630P	6.82448	5.60381	-0.28612	0.00045726	0.04596	1
868	piR-38845	hsa_piRNA_23226	DQ600779P	7.84618	6.42788	-0.28449	0.009298	0.16367	1
583	piR-57005	hsa_piRNA_5066	DQ589893P	0.57608	0.46835	-0.28168	0.0046957	0.12306	1	RP3-468B3.2
815	piR-31558	hsa_piRNA_30513	DQ571446P	1.81999	1.4825	-0.28012	0.0082408	0.15449	1
898	piR-55776	hsa_piRNA_6295	DQ588664P	1.59273	1.30023	-0.28009	0.0099956	0.17007	1	WDR18
833	piR-56093	hsa_piRNA_5978	DQ588981P	1.39111	1.14496	-0.27664	0.0085639	0.15708	1	FAM225B,FAM225A
415	piR-51104	hsa_piRNA_10967	DQ583992P	0.61733	0.5087	-0.27589	0.002743	0.10099	1
320	piR-52687	hsa_piRNA_9384	DQ585575P	1.32737	1.10487	-0.2729	0.00157981	0.07543	1	NCR3LG1
304	piR-30999	hsa_piRNA_31072	DQ570887P	3.76231	3.11139	-0.27155	0.00142395	0.07157	1	CTC-523E23.4
412	piR-51327	hsa_piRNA_10744	DQ584215P	4.97456	4.10216	-0.26698	0.0027044	0.10029	1	SH2B3
161	piR-38063	hsa_piRNA_24008	DQ599997P	2.13666	1.77854	-0.26611	0.00049908	0.04736	1
607	piR-61960	hsa_piRNA_111	DQ595848P	5.0455	4.17847	-0.26354	0.0049645	0.12496	1	EEF1G,MIR3654,CHCHD3
125	piR-34271	hsa_piRNA_27800	DQ596205P	2.94494	2.44918	-0.2632	0.00031955	0.03906	1
751	piR-57591	hsa_piRNA_4480	DQ590479P	0.61889	0.51932	-0.26278	0.007239	0.14728	1	RP1-63G5.5
873	piR-61859	hsa_piRNA_212	DQ595747P	0.91835	0.74258	-0.25997	0.0094183	0.16484	1	FAM225B,FAM225A
399	piR-54358	hsa_piRNA_7713	DQ587246P	1.04009	0.86751	-0.25958	0.0025047	0.09591	1	RP3-468B3.2,LINC01016
527	piR-43214	hsa_piRNA_18856	DQ575102P	1.08792	0.90552	-0.25849	0.0040389	0.1171	1	DNM1P47,DNM1P47,DNM1P47,DNM1P47,DNM1P46,DNM1P47,DNM1P47,DNM1P47,DNM1P47,DNM1P47,DNM1P47,DNM1P47,DNM1P47,DNM1P47,DNM1P47,DNM1P47,DNM1P47,DNM1P47,DNM1P47,DNM1P47,DNM1P47,DNM1P47,DNM1P47,DNM1P47,DNM1P47,DNM1P47,DNM1P47,DNM1P47,DNM1P47,DNM1P47,DNM1P47,DNM1P47,DNM1P47,DNM1P47,DNM1P47,DNM1P47,DNM1P47,DNM1P47,DNM1P47,DNM1P47,DNM1P47,DNM1P47
879	piR-43517	hsa_piRNA_18554	DQ575405P	0.32001	0.26642	-0.25718	0.0095638	0.16624	1	GOLGA2P11
612	piR-53391	hsa_piRNA_8680	DQ586279P	1.23512	1.03634	-0.25342	0.0050371	0.12575	1	CYP19A1,RP11-108K3.1
874	piR-30535	hsa_piRNA_31536	DQ570423P	6.74163	5.63318	-0.25052	0.0094594	0.16537	1	RP3-468B3.2
849	piR-40628	hsa_piRNA_21443	DQ572516P	6.592	5.54208	-0.24954	0.0089036	0.16023	1	CTD-2619J13.14,ZNF584
673	piR-58604	hsa_piRNA_3467	DQ591492P	2.64602	2.2275	-0.24789	0.0059355	0.13475	1	TBC1D3P3,TBC1D3P4,RP11-434D2.10
290	piR-54229	hsa_piRNA_7842	DQ587117P	16.6405	13.8942	-0.24678	0.00135785	0.07154	1	DNM1P47,DNM1P47,DNM1P47,DNM1P47,DNM1P47,DNM1P47,DNM1P47,DNM1P47,DNM1P47,DNM1P47,DNM1P47,DNM1P47,DNM1P47,DNM1P47,DNM1P47,DNM1P33,DNM1P47,DNM1P47,DNM1P47,DNM1P34,DNM1P47,DNM1P47,DNM1P47,DNM1P47,DNM1P47
69	piR-46328	hsa_piRNA_15743	DQ578216P	2.17667	1.83459	-0.24506	0.00010312	0.02283	1	SDCCAG3
118	piR-54315	hsa_piRNA_7756	DQ587203P	1.35886	1.14892	-0.24361	0.00028168	0.03647	1
184	piR-35011	hsa_piRNA_27060	DQ596945P	19.3539	16.3322	-0.24291	0.00064369	0.05345	1	ZNF90,LINC-ROR,USH2A
479	piR-54245	hsa_piRNA_7826	DQ587133P	15.2213	12.9168	-0.24067	0.0034035	0.10856	1	DNM1P47,DNM1P47,DNM1P47,DNM1P47,DNM1P47,DNM1P47,DNM1P47,DNM1P47,DNM1P47,DNM1P47,DNM1P47,DNM1P47,DNM1P47,DNM1P47,DNM1P47,DNM1P47,DNM1P47,DNM1P47,DNM1P47,DNM1P47,DNM1P47,DNM1P47,DNM1P47,DNM1P47,DNM1P47,DNM1P47,DNM1P47,DNM1P47,DNM1P47,DNM1P47,DNM1P47,DNM1P47,DNM1P47,DNM1P47,DNM1P47,DNM1P47,DNM1P47,DNM1P47,DNM1P47,DNM1P47,DNM1P47,DNM1P47,DNM1P47,DNM1P47,DNM1P47,DNM1P47,DNM1P47,DNM1P47,DNM1P47,DNM1P47…
417	piR-44030	hsa_piRNA_18041	DQ575918P	0.50579	0.4291	-0.24012	0.002756	0.10098	1	RP3-468B3.2
638	piR-31156	hsa_piRNA_30915	DQ571044P	2.0307	1.70806	-0.23995	0.0054234	0.12988	1	BSN
800	piR-32965	hsa_piRNA_29106	DQ582853P	3.92253	3.28622	-0.2397	0.0079763	0.15234	1	LINC00930
278	piR-55664	hsa_piRNA_6407	DQ588552P	11.1551	9.42826	-0.23855	0.0012633	0.06943	1	NPAP1P6
818	piR-58564	hsa_piRNA_3507	DQ591452P	0.90587	0.76251	-0.23842	0.0082981	0.155	1	IGHM,IGHG1
561	piR-47315	hsa_piRNA_14756	DQ579203P	1.67723	1.43124	-0.23543	0.0043039	0.11722	1	AP000350.10
333	piR-30928	hsa_piRNA_31143	DQ570816P	4.28501	3.63942	-0.23269	0.00171637	0.07875	1	DNM1P47,DNM1P47,DNM1P47,DNM1P47,DNM1P47,DNM1P47
492	piR-30774	hsa_piRNA_31297	DQ570662P	2.88414	2.46967	-0.22401	0.0035351	0.10978	1	CTC-523E23.4
328	piR-51479	hsa_piRNA_10592	DQ584367P	1.22842	1.04998	-0.22398	0.00162399	0.07565	1	SLC25A15
667	piR-33454	hsa_piRNA_28617	DQ593342P	4.20896	3.61746	-0.22323	0.0058595	0.13422	1
605	piR-45300	hsa_piRNA_16771	DQ577188P	1.04705	0.89235	-0.22221	0.0049587	0.12523	1
393	piR-52766	hsa_piRNA_9305	DQ585654P	3.13432	2.65758	-0.2199	0.0024372	0.09475	1	DNM1P34
865	piR-50864	hsa_piRNA_11207	DQ583752P	1.6773	1.43602	-0.21747	0.0092438	0.16328	1	LINC01016
572	piR-54772	hsa_piRNA_7299	DQ587660P	0.44571	0.38289	-0.21615	0.0045008	0.12022	1	ZNRF2P2
700	piR-43833	hsa_piRNA_18238	DQ575721P	0.848	0.7411	-0.20909	0.0062805	0.13709	1	SH3PXD2A
592	piR-55782	hsa_piRNA_6289	DQ588670P	2.15174	1.86039	-0.20495	0.0048017	0.12393	1
788	piR-36645	hsa_piRNA_25426	DQ598579P	0.71228	0.62101	-0.20246	0.0077412	0.1501	1	USP6
691	piR-38515	hsa_piRNA_23556	DQ600449P	22.6774	19.6889	-0.20053	0.0061605	0.13622	1	FAM153A,FAM153B,FAM153C
455	piR-48530	hsa_piRNA_13541	DQ580418P	2.9099	2.52819	-0.20029	0.0031827	0.10688	1
743	piR-31729	hsa_piRNA_30342	DQ571617P	2.10468	1.83924	-0.19885	0.0070962	0.14593	1	AP000350.10
353	piR-37609	hsa_piRNA_24462	DQ599543P	3.50248	3.05619	-0.19816	0.0019217	0.08318	1
858	piR-43890	hsa_piRNA_18181	DQ575778P	1.86466	1.63181	-0.19414	0.00904	0.16098	1
803	piR-42151	hsa_piRNA_19920	DQ574039P	2.18281	1.91152	-0.19376	0.0080371	0.15293	1	CTC-523E23.4
133	piR-49916	hsa_piRNA_12155	DQ581804P	2.42986	2.1212	-0.19018	0.00036036	0.0414	1	TSTD2
589	piR-44265	hsa_piRNA_17806	DQ576153P	2.80586	2.47154	-0.18924	0.0047615	0.12352	1	TPPP,CEP72
47	piR-39647	hsa_piRNA_22424	DQ601581P	1.05285	0.92973	-0.18742	5.5152e-05	0.01793	0.84267
655	piR-41054	hsa_piRNA_21017	DQ572942P	1.17663	1.03371	-0.18693	0.0055792	0.13014	1
619	piR-42738	hsa_piRNA_19333	DQ574626P	1.90205	1.65534	-0.18673	0.0051214	0.12641	1
460	piR-34808	hsa_piRNA_27263	DQ596742P	6.74153	5.93268	-0.18565	0.0032417	0.10767	1	ANKRD20A19P
890	piR-51781	hsa_piRNA_10290	DQ584669P	0.75923	0.66164	-0.18528	0.0098177	0.16854	1	ALG1L5P,ALG1L8P,ALG1L3P,ALG1L,ALG1L15P,ALG1,KCNAB1,TSSC2
360	piR-43304	hsa_piRNA_18767	DQ575192P	4.96154	4.38224	-0.18325	0.001981	0.08408	1	PRDX5
543	piR-32352	hsa_piRNA_29719	DQ582240P	2.73346	2.40905	-0.18219	0.0041564	0.11695	1	RSPO4
594	piR-49026	hsa_piRNA_13045	DQ580914P	3.0407	2.67801	-0.17781	0.0048207	0.124	1	RP3-468B3.2
796	piR-40526	hsa_piRNA_21545	DQ572414P	3.15616	2.78123	-0.17526	0.0079236	0.15209	1
854	piR-61858	hsa_piRNA_213	DQ595746P	0.73406	0.64443	-0.17439	0.0090237	0.16144	1	FAM225A,FAM225B
546	piR-41438	hsa_piRNA_20633	DQ573326P	5.5966	4.97653	-0.16705	0.0041764	0.11687	1
22	piR-33406	hsa_piRNA_28665	DQ593294P	1.93621	1.72596	-0.16638	1.87293e-05	0.01301	0.28616
734	piR-30348	hsa_piRNA_31723	DQ570236P	10.5461	9.39805	-0.16436	0.0069016	0.14366	1	GAB2
896	piR-36483	hsa_piRNA_25588	DQ598417P	1.14834	1.03309	-0.16004	0.0099228	0.16921	1	RP11-299H22.3
321	piR-48425	hsa_piRNA_13646	DQ580313P	4.24846	3.7861	-0.15794	0.00158268	0.07533	1
891	piR-33258	hsa_piRNA_28813	DQ593146P	0.84714	0.75773	-0.1558	0.009819	0.16838	1	MAN2B2
884	piR-30886	hsa_piRNA_31185	DQ570774P	7.52737	6.75158	-0.15493	0.0096615	0.16699	1	RP11-520B13.8,SNX18P7
528	piR-60414	hsa_piRNA_1657	DQ594302P	3.54354	3.18332	-0.14648	0.0040439	0.11702	1	RP11-12J10.3,FAM53B
245	piR-45113	hsa_piRNA_16958	DQ577001P	3.667	3.29157	-0.14643	0.0010211	0.06368	1	DNM1P47,DNM1P47,DNM1P47
799	piR-30918	hsa_piRNA_31153	DQ570806P	1.62234	1.46489	-0.14584	0.0079559	0.15214	1	RP11-386M24.3
814	piR-61298	hsa_piRNA_773	DQ595186P	16.7657	15.2376	-0.13847	0.0081971	0.15386	1	RPL17,MIR1539,SNORD58C,RPL17-C18orf32,C18orf32
434	piR-31133	hsa_piRNA_30938	DQ571021P	8.80328	8.00913	-0.12929	0.0029353	0.10334	1
489	piR-32406	hsa_piRNA_29665	DQ582294P	6.76317	6.22406	-0.12307	0.0035161	0.10986	1
826	piR-52528	hsa_piRNA_9543	DQ585416P	0.38524	0.35936	-0.09938	0.0084164	0.15568	1	AAAS
869	piR-54056	hsa_piRNA_8015	DQ586944P	0.70806	0.76848	0.12213	0.0093017	0.16355	1
361	piR-45359	hsa_piRNA_16712	DQ577247P	0.82415	0.90477	0.12637	0.00199821	0.08457	1	RP5-1165K10.2,AC004985.12,POLR2J4
515	piR-51520	hsa_piRNA_10551	DQ584408P	2.88893	3.20135	0.15484	0.0038234	0.11343	1	KIF9-AS1
319	piR-31482	hsa_piRNA_30589	DQ571370P	0.94581	1.05369	0.16402	0.00157917	0.07564	1	GOLGA2P11
670	piR-45101	hsa_piRNA_16970	DQ576989P	6.5339	7.28511	0.16509	0.005897	0.13448	1
682	piR-52885	hsa_piRNA_9186	DQ585773P	0.71286	0.79961	0.17017	0.0060241	0.13496	1	LINC00905
501	piR-52945	hsa_piRNA_9126	DQ585833P	0.87756	0.98597	0.17209	0.0035994	0.10977	1	RP11-299H22.4,GOLGA2P11,GOLGA2P11
820	piR-38082	hsa_piRNA_23989	DQ600016P	0.52168	0.5856	0.17375	0.0083152	0.15494	1
876	piR-49143	hsa_piRNA_12928	DQ581031P	1.56023	1.77053	0.18771	0.0094776	0.16531	1	RP11-2B6.3,MIRLET7F1
666	piR-56423	hsa_piRNA_5648	DQ589311P	2.09947	2.38426	0.18783	0.0058191	0.1335	1
838	piR-32326	hsa_piRNA_29745	DQ582214P	0.20343	0.23217	0.19392	0.008681	0.15828	1	FAM225A,FAM225B
303	piR-54072	hsa_piRNA_7999	DQ586960P	0.39198	0.45388	0.21454	0.00142296	0.07175	1	NPIPB5,RP11-347C12.1,PDXDC2P,NPIPB3,SLC35G4P,NPIPB4,NPIPA3
150	piR-31912	hsa_piRNA_30159	DQ571800P	0.97272	1.13294	0.21803	0.00043823	0.04464	1	ZKSCAN7,MPRIP,MPRIPP1,RP11-944L7.5,RP11-944L7.4,ZNF660
254	piR-48618	hsa_piRNA_13453	DQ580506P	2.86197	3.341	0.22201	0.00110305	0.06635	1	RP11-299H22.3
302	piR-60613	hsa_piRNA_1458	DQ594501P	0.38599	0.44061	0.22564	0.00142276	0.07198	1	TRIM14,TRIM14
850	piR-57966	hsa_piRNA_4105	DQ590854P	1.6617	1.9761	0.24535	0.0089244	0.16042	1	FAM225B,FAM225A
503	piR-61035	hsa_piRNA_1036	DQ594923P	0.49723	0.5892	0.24542	0.0036387	0.11053	1
445	piR-31845	hsa_piRNA_30226	DQ571733P	0.35431	0.42284	0.2588	0.0030762	0.10562	1	NPAP1P6
206	piR-44252	hsa_piRNA_17819	DQ576140P	0.8144	0.97576	0.26101	0.00078075	0.05791	1
558	piR-58630	hsa_piRNA_3441	DQ591518P	1.13556	1.36611	0.26696	0.0042835	0.11729	1	SNHG14,SNORD116-20
459	piR-60682	hsa_piRNA_1389	DQ594570P	1.74895	2.10849	0.26839	0.0032228	0.10728	1	RP1-63G5.5
495	piR-39463	hsa_piRNA_22608	DQ601397P	3.5964	4.28253	0.26905	0.0035419	0.10933	1
93	piR-46156	hsa_piRNA_15915	DQ578044P	1.93525	2.34418	0.27399	0.000184248	0.03027	1	RP3-468B3.2
178	piR-33059	hsa_piRNA_29012	DQ592947P	0.62517	0.7644	0.27616	0.00059757	0.05129	1	LIMD2
348	piR-61322	hsa_piRNA_749	DQ595210P	2.761	3.25918	0.27635	0.00186294	0.08179	1	FAM225B,FAM225A
778	piR-39779	hsa_piRNA_22292	DQ601713P	0.41423	0.5028	0.28302	0.0075223	0.14773	1	CYP19A1
437	piR-50721	hsa_piRNA_11350	DQ583609P	3.0457	3.71236	0.28876	0.0030037	0.10502	1	BCR,BCRP4,BCRP3
37	piR-49772	hsa_piRNA_12299	DQ581660P	0.61768	0.75885	0.29745	3.5979e-05	0.01486	0.54972	SPATA8-AS1
593	piR-42082	hsa_piRNA_19989	DQ573970P	1.04907	1.28565	0.29918	0.004818	0.12414	1
794	piR-31557	hsa_piRNA_30514	DQ571445P	9.56483	11.8335	0.30242	0.0079028	0.15207	1	LINC00964
457	piR-34055	hsa_piRNA_28016	DQ595989P	1.25693	1.55487	0.30577	0.0031976	0.10691	1	NUDCD3
660	piR-45835	hsa_piRNA_16236	DQ577723P	0.22492	0.27693	0.30588	0.0057049	0.13207	1	CTC-523E23.5,CTC-523E23.11
883	piR-40960	hsa_piRNA_21111	DQ572848P	3.54133	4.39396	0.30916	0.0096166	0.1664	1	NPAP1P6
265	piR-40606	hsa_piRNA_21465	DQ572494P	0.24672	0.30681	0.3192	0.00117789	0.06791	1	RP5-1022P6.7,LINC00654
447	piR-37165	hsa_piRNA_24906	DQ599099P	0.2668	0.33115	0.32007	0.0030781	0.10521	1	PRMT8
737	piR-31459	hsa_piRNA_30612	DQ571347P	2.74713	3.45222	0.32078	0.0069182	0.14342	1	RP11-386M24.3
110	piR-36759	hsa_piRNA_25312	DQ598693P	0.50002	0.6217	0.32229	0.00026242	0.03645	1
156	piR-42143	hsa_piRNA_19928	DQ574031P	0.32084	0.39756	0.32287	0.00047759	0.04678	1	TMEM181,TATDN2P2
428	piR-38094	hsa_piRNA_23977	DQ600028P	0.40107	0.49798	0.325	0.0028776	0.10273	1	RP11-753D20.1
432	piR-60616	hsa_piRNA_1455	DQ594504P	0.24817	0.32216	0.32999	0.0029216	0.10333	1	C7orf31
391	piR-33851	hsa_piRNA_28220	DQ593739P	1.04618	1.29837	0.33153	0.0023779	0.09292	1
855	piR-45887	hsa_piRNA_16184	DQ577775P	0.61473	0.76805	0.33209	0.0090246	0.16127	1
857	piR-45224	hsa_piRNA_16847	DQ577112P	0.93926	1.19612	0.33277	0.0090391	0.16115	1	PRMT8
669	piR-34819	hsa_piRNA_27252	DQ596753P	1.58779	1.98575	0.3334	0.0058808	0.13431	1	RP6-186E3.1,IMPDH1P10,CFLAR,RP11-537H15.4,RP13-39P12.2
339	piR-30306	hsa_piRNA_31765	DQ570194P	0.75141	0.94275	0.33377	0.00176345	0.07948	1	GCA,PAQR9-AS1,U2SURP,PDZRN4,RRAGD
137	piR-36189	hsa_piRNA_25882	DQ598123P	0.76024	0.95916	0.33395	0.00039594	0.04416	1
517	piR-49811	hsa_piRNA_12260	DQ581699P	0.69433	0.87363	0.33983	0.0039014	0.1153	1	LINC01016
289	piR-48338	hsa_piRNA_13732	DQ580226P	0.73242	0.92478	0.34053	0.00135664	0.07172	1	LINC01016
270	piR-61496	hsa_piRNA_575	DQ595384P	1.29063	1.67109	0.35313	0.00120327	0.06809	1	LINC01016
364	piR-59383	hsa_piRNA_2688	DQ592271P	0.65986	0.84477	0.35392	0.0020576	0.08637	1
260	piR-49552	hsa_piRNA_12519	DQ581440P	1.37645	1.77128	0.35871	0.00114293	0.06716	1
352	piR-38347	hsa_piRNA_23724	DQ600281P	2.10024	2.69852	0.36304	0.0019215	0.08341	1	RP11-299H22.3,Metazoa_SRP
613	piR-46653	hsa_piRNA_15418	DQ578541P	1.80131	2.31174	0.37246	0.0050378	0.12557	1
574	piR-31288	hsa_piRNA_30783	DQ571176P	0.74648	0.96673	0.37902	0.0045161	0.12021	1	RHOC,RP11-426L16.10
462	piR-33665	hsa_piRNA_28406	DQ593553P	0.7694	1.01707	0.39027	0.0032431	0.10725	1	POM121L10P,FAM230B,POM121L9P,FAM230B,POM121L8P,POM121L7,POM121L9P,POM121L4P,POM121L7,POM121L1P,POM121L1P
131	piR-30992	hsa_piRNA_31079	DQ570880P	5.10601	6.68282	0.39258	0.00034457	0.04019	1
625	piR-54192	hsa_piRNA_7879	DQ587080P	0.40757	0.54102	0.39299	0.0052222	0.12766	1	RN7SL209P,DNM1P47,GOLGA8VP
812	piR-59050	hsa_piRNA_3021	DQ591938P	2.59459	3.30455	0.39436	0.0081606	0.15355	1	RYBP
372	piR-56483	hsa_piRNA_5588	DQ589371P	0.81741	1.07525	0.39442	0.0021646	0.08891	1
15	piR-30846	hsa_piRNA_31225	DQ570734P	0.64612	0.84972	0.39854	3.4045e-06	0.00347	0.05202	PIGG
871	piR-54435	hsa_piRNA_7636	DQ587323P	0.8158	1.07042	0.39882	0.0093402	0.16384	1	LINC01016
480	piR-30440	hsa_piRNA_31631	DQ570328P	0.43732	0.58152	0.39935	0.0034042	0.10836	1
416	piR-34300	hsa_piRNA_27771	DQ596234P	1.87619	2.45236	0.40343	0.002744	0.10078	1	RP11-466G12.3
775	piR-58146	hsa_piRNA_3925	DQ591034P	0.16321	0.22825	0.40857	0.0075023	0.14791	1	RP11-753D20.1
744	piR-58016	hsa_piRNA_4055	DQ590904P	0.31471	0.41613	0.40892	0.0070987	0.14578	1	PLIN3
642	piR-58258	hsa_piRNA_3813	DQ591146P	0.13962	0.18742	0.4171	0.0054579	0.12989	1
506	piR-33472	hsa_piRNA_28599	DQ593360P	30.2081	40.3915	0.42086	0.0036609	0.11054	1
94	piR-37438	hsa_piRNA_24633	DQ599372P	1.35177	1.81377	0.42103	0.000195998	0.03186	1	GOLGA2P11
698	piR-39339	hsa_piRNA_22732	DQ601273P	0.26489	0.34595	0.42666	0.0062447	0.13669	1
129	piR-57069	hsa_piRNA_5002	DQ589957P	1.97168	2.67112	0.42826	0.00033514	0.03969	1	ANKRD18A,RP11-392E22.11,CYP4F26P,ANKRD18A
371	piR-33438	hsa_piRNA_28633	DQ593326P	5.43714	7.2911	0.42924	0.0021571	0.08884	1	GPATCH3
188	piR-35472	hsa_piRNA_26599	DQ597406P	1.08981	1.47035	0.4322	0.00066402	0.05397	1
683	piR-36089	hsa_piRNA_25982	DQ598023P	0.87869	1.1946	0.43711	0.0060635	0.13564	1	TMEM181
614	piR-44890	hsa_piRNA_17181	DQ576778P	0.69916	0.92749	0.44229	0.0050597	0.12591	1
878	piR-51162	hsa_piRNA_10909	DQ584050P	0.15195	0.20053	0.45523	0.0095355	0.16594	1	DUSP6
461	piR-61797	hsa_piRNA_274	DQ595685P	0.31963	0.42725	0.45713	0.0032429	0.10748	1	LINC01016
174	piR-35767	hsa_piRNA_26304	DQ597701P	0.24505	0.34504	0.47602	0.00057633	0.05061	1
340	piR-39863	hsa_piRNA_22208	DQ601797P	0.86083	1.19445	0.4778	0.0017771	0.07986	1	CYFIP1
384	piR-60936	hsa_piRNA_1135	DQ594824P	0.24728	0.33944	0.48347	0.0023013	0.09157	1
179	piR-38230	hsa_piRNA_23841	DQ600164P	1.62112	2.26854	0.4869	0.00060157	0.05135	1
887	piR-47058	hsa_piRNA_15013	DQ578946P	0.35315	0.49114	0.48878	0.009696	0.16702	1
89	piR-50527	hsa_piRNA_11544	DQ583415P	0.70025	0.99768	0.49427	0.00017886	0.03071	1	CCSER1
646	piR-50543	hsa_piRNA_11528	DQ583431P	1.2772	1.74066	0.5014	0.0054997	0.13008	1
860	piR-32306	hsa_piRNA_29765	DQ582194P	2.54581	3.59296	0.50458	0.0091418	0.16242	1
367	piR-47529	hsa_piRNA_14542	DQ579417P	0.51695	0.72963	0.50475	0.0020773	0.08648	1	N4BP1
299	piR-30498	hsa_piRNA_31573	DQ570386P	0.17831	0.25272	0.50888	0.00140017	0.07155	1	LINC00905
114	piR-51323	hsa_piRNA_10748	DQ584211P	0.93278	1.32536	0.50889	0.00027619	0.03702	1	BMP6
85	piR-55283	hsa_piRNA_6788	DQ588171P	0.99308	1.42319	0.52545	0.000158779	0.02854	1
264	piR-56594	hsa_piRNA_5477	DQ589482P	1.04056	1.48387	0.52636	0.00116225	0.06727	1	MIR7154
485	piR-53352	hsa_piRNA_8719	DQ586240P	0.63458	0.9506	0.53928	0.0034769	0.10953	1
851	piR-40179	hsa_piRNA_21892	DQ572067P	1.41189	2.21163	0.54252	0.0089427	0.16056	1
157	piR-48273	hsa_piRNA_13798	DQ580161P	4.94997	7.17403	0.54495	0.00048183	0.04689	1	RP11-146D12.2,bP-21264C1.3,SNX18P9,SNX18P5,SNX18P8,SNX18P9,SNX18P24,bP-21264C1.2,SNX18P23
785	piR-37404	hsa_piRNA_24667	DQ599338P	0.27335	0.39631	0.54548	0.0076768	0.14942	1	SAMD8
805	piR-55092	hsa_piRNA_6979	DQ587980P	0.09437	0.13176	0.55015	0.0080565	0.15291	1	UBN1
192	piR-32537	hsa_piRNA_29534	DQ582425P	3.03656	4.47582	0.55107	0.0006791	0.05404	1
287	piR-59038	hsa_piRNA_3033	DQ591926P	0.74985	1.07228	0.55174	0.00134122	0.0714	1	HSPA8
195	piR-45642	hsa_piRNA_16429	DQ577530P	0.14565	0.21548	0.55425	0.00068263	0.05349	1	GOLGA8VP,RN7SL209P,DNM1P47
725	piR-39484	hsa_piRNA_22587	DQ601418P	4.94589	7.08139	0.55659	0.0067825	0.14294	1	NPAP1P6
275	piR-39494	hsa_piRNA_22577	DQ601428P	1.9014	2.77569	0.56276	0.00122362	0.06798	1	LINC00905
618	piR-31660	hsa_piRNA_30411	DQ571548P	0.34866	0.51556	0.56443	0.0051033	0.12617	1
297	piR-33390	hsa_piRNA_28681	DQ593278P	0.78735	1.22157	0.56741	0.00139777	0.07191	1	NAV2
881	piR-61293	hsa_piRNA_778	DQ595181P	0.09861	0.14371	0.56972	0.0095792	0.16613	1	HCG17,HCG18
464	piR-49922	hsa_piRNA_12149	DQ581810P	0.13042	0.19558	0.57588	0.0032555	0.1072	1	TMUB2
766	piR-38226	hsa_piRNA_23845	DQ600160P	0.89105	1.34558	0.57595	0.007401	0.14762	1	CTC-523E23.4
520	piR-38229	hsa_piRNA_23842	DQ600163P	1.02251	1.54613	0.57791	0.0039566	0.11626	1
658	piR-60720	hsa_piRNA_1351	DQ594608P	2.97448	4.38686	0.58858	0.005656	0.13133	1	ADAM12
728	piR-41676	hsa_piRNA_20395	DQ573564P	1.02604	1.53104	0.59451	0.0068391	0.14354	1	SPATA8-AS1
624	piR-47121	hsa_piRNA_14950	DQ579009P	0.65632	0.97721	0.60068	0.0052188	0.12779	1	ZKSCAN7,ZNF660,RP11-944L7.5,RP11-944L7.4,MPRIPP1,MPRIP
548	piR-35641	hsa_piRNA_26430	DQ597575P	0.31075	0.47798	0.60191	0.004198	0.11705	1	LINC00837,LINC01517
842	piR-41501	hsa_piRNA_20570	DQ573389P	0.16033	0.23903	0.60744	0.0087402	0.1586	1	NSUN4
377	piR-56162	hsa_piRNA_5909	DQ589050P	0.22291	0.33966	0.61665	0.0022183	0.0899	1	N4BP1
835	piR-56283	hsa_piRNA_5788	DQ589171P	0.74449	1.18238	0.6182	0.0086373	0.15805	1
272	piR-33832	hsa_piRNA_28239	DQ593720P	0.18451	0.28632	0.62101	0.00122003	0.06853	1
758	piR-53542	hsa_piRNA_8529	DQ586430P	15.0131	22.0319	0.62108	0.0073198	0.14755	1
654	piR-54235	hsa_piRNA_7836	DQ587123P	4.25642	6.25497	0.62641	0.0055646	0.13	1	CTC-338M12.5
573	piR-44967	hsa_piRNA_17104	DQ576855P	33.7346	50.9716	0.62773	0.0045157	0.12041	1	RP3-468B3.2
615	piR-32863	hsa_piRNA_29208	DQ582751P	0.63628	0.901	0.63212	0.0050617	0.12575	1	LINC01106,LINC01123,CH17-264L24.1
861	piR-53697	hsa_piRNA_8374	DQ586585P	14.5087	22.4263	0.63216	0.009143	0.16225	1	RP11-299H22.3
616	piR-50342	hsa_piRNA_11729	DQ583230P	0.89619	1.36983	0.64357	0.0050996	0.12649	1	CTC-559E9.12
702	piR-47339	hsa_piRNA_14732	DQ579227P	1.19645	1.84607	0.6451	0.0062828	0.13674	1
562	piR-36011	hsa_piRNA_26060	DQ597945P	0.76075	1.18842	0.65254	0.0043172	0.11737	1
521	piR-34065	hsa_piRNA_28006	DQ595999P	1.3856	2.07696	0.65468	0.0039584	0.11609	1	RP11-434D2.3,TBC1D3P4,TBC1D3P3
138	piR-53871	hsa_piRNA_8200	DQ586759P	2.06144	3.23896	0.65789	0.00039687	0.04394	1	NOTCH2NL,NOTCH2NL
643	piR-32443	hsa_piRNA_29628	DQ582331P	0.21248	0.32625	0.65841	0.0054628	0.12981	1	AP001628.7
189	piR-52135	hsa_piRNA_9936	DQ585023P	2.97034	4.66703	0.67181	0.00066448	0.05372	1
648	piR-43799	hsa_piRNA_18272	DQ575687P	1.50814	2.32994	0.67359	0.0055215	0.13019	1
713	piR-59243	hsa_piRNA_2828	DQ592131P	0.53517	0.83892	0.67438	0.0065959	0.14134	1	ARHGAP35
491	piR-58687	hsa_piRNA_3384	DQ591575P	0.11529	0.18073	0.68105	0.0035235	0.10964	1	RP11-164C12.2,RP11-266O8.1
761	piR-48642	hsa_piRNA_13429	DQ580530P	0.2301	0.36273	0.68745	0.0073393	0.14736	1
772	piR-61313	hsa_piRNA_758	DQ595201P	3.55115	5.57892	0.68994	0.0074596	0.14764	1	GAGE10,NKAPP1,RP4-755D9.1
244	piR-60283	hsa_piRNA_1788	DQ594171P	0.44933	0.69288	0.69506	0.0010184	0.06377	1	TRIM14,TRIM14
590	piR-51861	hsa_piRNA_10210	DQ584749P	1.5609	2.5459	0.71315	0.0047791	0.12376	1	FAM225A,FAM225B
217	piR-48511	hsa_piRNA_13560	DQ580399P	0.27717	0.44959	0.71724	0.00083589	0.05886	1	MCL1
359	piR-34795	hsa_piRNA_27276	DQ596729P	0.81058	1.30892	0.72056	0.00197661	0.08412	1
823	piR-49468	hsa_piRNA_12603	DQ581356P	0.42946	0.73462	0.7234	0.0083402	0.15484	1	FAM53B,RP11-12J10.3
742	piR-32153	hsa_piRNA_29918	DQ582041P	0.09418	0.16031	0.72444	0.0070805	0.1458	1	LINC01016
680	piR-31329	hsa_piRNA_30742	DQ571217P	2.04772	3.35077	0.72953	0.0060045	0.13492	1	GOLGA2P11
810	piR-31894	hsa_piRNA_30177	DQ571782P	1.65862	2.65218	0.73173	0.0081421	0.15358	1
397	piR-30439	hsa_piRNA_31632	DQ570327P	2.61721	4.47115	0.73346	0.0024971	0.0961	1
331	piR-59296	hsa_piRNA_2775	DQ592184P	0.6329	1.05752	0.73597	0.00169956	0.07845	1	RP11-753D20.1
387	piR-48635	hsa_piRNA_13436	DQ580523P	0.27137	0.44092	0.7399	0.0023373	0.09228	1	PCDHB16,CH17-140K24.2,CH17-140K24.5
885	piR-53748	hsa_piRNA_8323	DQ586636P	17.5106	27.7046	0.74775	0.0096622	0.16681	1	ZP1
410	piR-32426	hsa_piRNA_29645	DQ582314P	1.56846	2.70702	0.75123	0.0026639	0.09927	1
496	piR-58749	hsa_piRNA_3322	DQ591637P	1.41261	2.28785	0.75414	0.003542	0.10911	1	JOSD1
608	piR-50623	hsa_piRNA_11448	DQ583511P	0.43689	0.72392	0.75959	0.0049797	0.12514	1	LINC01193
864	piR-43797	hsa_piRNA_18274	DQ575685P	7.69039	12.3372	0.76295	0.0091824	0.16238	1	TBC1D3P3,TBC1D3C,TBC1D3B,TBC1D3,TBC1D3P1,TBC1D3H,TBC1D3F,CH17-129M10.1,TBC1D3H,TBC1D3,CTB-91J4.1,TBC1D3P1-DHX40P1,TBC1D3P2,USP6,TBC1D3F,TBC1D3H,TBC1D3,RP11-434D2.3,TBC1D3P4
681	piR-58948	hsa_piRNA_3123	DQ591836P	0.09865	0.16247	0.76351	0.0060156	0.13497	1
522	piR-45462	hsa_piRNA_16609	DQ577350P	1.32717	2.21614	0.76756	0.003961	0.11594	1
644	piR-36155	hsa_piRNA_25916	DQ598089P	1.60305	2.57395	0.7686	0.0054648	0.12965	1	PAAF1
771	piR-39992	hsa_piRNA_22079	DQ601926P	0.08682	0.14272	0.77054	0.0074431	0.1475	1	AP000350.10
708	piR-53746	hsa_piRNA_8325	DQ586634P	15.5035	25.2441	0.78233	0.0064983	0.14024	1	FAR2P4,PLEKHB2
866	piR-39878	hsa_piRNA_22193	DQ601812P	3.33147	5.52756	0.79928	0.0092446	0.1631	1
877	piR-45191	hsa_piRNA_16880	DQ577079P	3.5819	6.16159	0.80124	0.0094846	0.16524	1	FMN1
60	piR-39694	hsa_piRNA_22377	DQ601628P	4.9534	8.65501	0.80641	8.1697e-05	0.0208	1	ERICH1,TNFRSF8,LINC00707
56	piR-54310	hsa_piRNA_7761	DQ587198P	0.32112	0.55688	0.80822	7.5259e-05	0.02053	1	RP11-545A16.3
347	piR-51142	hsa_piRNA_10929	DQ584030P	0.6036	0.97824	0.80942	0.00186274	0.08202	1
153	piR-30074	hsa_piRNA_31997	DQ569962P	0.44921	0.8058	0.8112	0.00046446	0.04638	1	SKI
420	piR-51804	hsa_piRNA_10267	DQ584692P	0.57305	1.04457	0.8169	0.0027783	0.10107	1	AC011247.3,HNRNPLL
580	piR-55762	hsa_piRNA_6309	DQ588650P	5.85253	10.2035	0.82227	0.0046048	0.1213	1	RP11-136C24.3,FAM198A
790	piR-43798	hsa_piRNA_18273	DQ575686P	9.00641	14.9666	0.82319	0.0078175	0.15119	1
483	piR-31893	hsa_piRNA_30178	DQ571781P	0.53244	0.94066	0.82349	0.0034438	0.10894	1
678	piR-30129	hsa_piRNA_31942	DQ570017P	0.25004	0.42562	0.8415	0.0059786	0.13473	1	RP3-468B3.2
763	piR-47660	hsa_piRNA_14411	DQ579548P	0.84644	1.49375	0.84332	0.0073792	0.14777	1
438	piR-45674	hsa_piRNA_16397	DQ577562P	1.38223	2.39367	0.84427	0.0030208	0.10538	1
740	piR-38997	hsa_piRNA_23074	DQ600931P	0.17036	0.29156	0.87039	0.0069805	0.14413	1	TRIM14
429	piR-47661	hsa_piRNA_14410	DQ579549P	0.43383	0.77907	0.87609	0.0028791	0.10254	1	RP11-299H22.3
446	piR-43287	hsa_piRNA_18784	DQ575175P	0.47766	0.86322	0.87784	0.0030773	0.10542	1	LINC01016
753	piR-43259	hsa_piRNA_18812	DQ575147P	3.35225	5.87255	0.87837	0.0072433	0.14697	1	TGIF2-C20orf24,TGIF2
240	piR-55452	hsa_piRNA_6619	DQ588340P	0.10753	0.20144	0.88746	0.00097597	0.06213	1	STK40
214	piR-58552	hsa_piRNA_3519	DQ591440P	0.27639	0.50123	0.89135	0.00081985	0.05853	1	RRBP1
827	piR-56950	hsa_piRNA_5121	DQ589838P	2.93978	5.07518	0.90732	0.0084197	0.15556	1
686	piR-59276	hsa_piRNA_2795	DQ592164P	1.3828	2.47219	0.92958	0.006104	0.13595	1	RP11-753D20.1
49	piR-34923	hsa_piRNA_27148	DQ596857P	0.85425	1.63248	0.93709	5.6218e-05	0.01753	0.85895	LINC01015
840	piR-58654	hsa_piRNA_3417	DQ591542P	0.39051	0.75416	0.93766	0.0087153	0.15853	1	RP11-146D12.2,FAM95B1
715	piR-56970	hsa_piRNA_5101	DQ589858P	2.60801	4.74681	0.968	0.0066217	0.1415	1
630	piR-42479	hsa_piRNA_19592	DQ574367P	0.09214	0.17075	0.96869	0.0053005	0.12855	1
12	piR-48056	hsa_piRNA_14015	DQ579944P	1.2301	2.40761	0.9723	2.4151e-06	0.00308	0.0369	AC007566.10,GATAD1
97	piR-48099	hsa_piRNA_13972	DQ579987P	0.79423	1.55959	0.97935	0.00020295	0.03197	1	ZNFX1
716	piR-30177	hsa_piRNA_31894	DQ570065P	1.90858	3.73724	0.98128	0.0066407	0.14171	1
439	piR-30123	hsa_piRNA_31948	DQ570011P	0.3446	0.64153	0.98166	0.0030381	0.10574	1	TXNRD1
337	piR-59295	hsa_piRNA_2776	DQ592183P	0.61228	1.21275	0.98243	0.0017408	0.07892	1	RP11-753D20.1
721	piR-50515	hsa_piRNA_11556	DQ583403P	0.33347	0.68998	0.98718	0.0067401	0.14283	1	FTCDNL1
525	piR-55327	hsa_piRNA_6744	DQ588215P	22.4556	41.8321	1.00238	0.0040218	0.11705	1	SNHG14
564	piR-36709	hsa_piRNA_25362	DQ598643P	0.23055	0.45895	1.01224	0.004359	0.11809	1
659	piR-45660	hsa_piRNA_16411	DQ577548P	1.08621	2.18326	1.01291	0.005664	0.13132	1	RP1-63G5.5
444	piR-47823	hsa_piRNA_14248	DQ579711P	9.74702	20.2942	1.01359	0.0030754	0.10583	1
633	piR-52740	hsa_piRNA_9331	DQ585628P	1.57469	3.1494	1.0164	0.0053637	0.12947	1	HLA-C,HLA-B
720	piR-52340	hsa_piRNA_9731	DQ585228P	0.70142	1.37577	1.03379	0.0067164	0.14253	1	KRT18P28
664	piR-54283	hsa_piRNA_7788	DQ587171P	0.88808	1.81436	1.0698	0.0057616	0.13258	1
597	piR-31890	hsa_piRNA_30181	DQ571778P	0.14972	0.30766	1.12951	0.004845	0.124	1	HERC2P4,RP11-19N8.4,RP11-19N8.4
634	piR-61986	hsa_piRNA_85	DQ595874P	0.21997	0.45966	1.13764	0.0053759	0.12956	1	LINC01016
837	piR-35509	hsa_piRNA_26562	DQ597443P	0.74576	1.68338	1.14145	0.0086396	0.15771	1
442	piR-54264	hsa_piRNA_7807	DQ587152P	1.44209	3.23582	1.15147	0.0030558	0.10563	1
745	piR-61011	hsa_piRNA_1060	DQ594899P	0.32741	0.69888	1.15327	0.0071235	0.14609	1
223	piR-49982	hsa_piRNA_12089	DQ581870P	2.0488	4.52225	1.16645	0.00085987	0.05891	1	SPATA8-AS1
637	piR-56805	hsa_piRNA_5266	DQ589693P	6.06089	13.5673	1.21486	0.0054031	0.1296	1
598	piR-53230	hsa_piRNA_8841	DQ586118P	1.49249	3.71841	1.21902	0.0048603	0.12418	1	FAM182B,FAM182A
730	piR-31972	hsa_piRNA_30099	DQ571860P	0.78895	1.86882	1.22794	0.0068611	0.1436	1	RP4-798A10.2
427	piR-36313	hsa_piRNA_25758	DQ598247P	0.93346	2.34033	1.23558	0.0028649	0.10251	1
261	piR-35994	hsa_piRNA_26077	DQ597928P	0.39196	0.95926	1.23728	0.00115562	0.06765	1
889	piR-56705	hsa_piRNA_5366	DQ589593P	0.28147	0.62914	1.23992	0.0097373	0.16735	1	GVINP1
754	piR-58504	hsa_piRNA_3567	DQ591392P	0.70533	1.70683	1.25813	0.0072579	0.14707	1
661	piR-48512	hsa_piRNA_13559	DQ580400P	1.78831	4.23057	1.26874	0.0057208	0.13224	1	CYP19A1,RP11-108K3.1
176	piR-56986	hsa_piRNA_5085	DQ589874P	0.17133	0.45903	1.27098	0.00059509	0.05166	1
213	piR-45872	hsa_piRNA_16199	DQ577760P	0.12528	0.31861	1.29918	0.00081618	0.05855	1
767	piR-37117	hsa_piRNA_24954	DQ599051P	0.13465	0.36767	1.3549	0.0074175	0.14776	1	CTC-523E23.4
234	piR-36683	hsa_piRNA_25388	DQ598617P	1.1897	3.17002	1.36887	0.00095511	0.06236	1
687	piR-55372	hsa_piRNA_6699	DQ588260P	1.86127	4.67936	1.37702	0.0061232	0.13618	1
45	piR-51450	hsa_piRNA_10621	DQ584338P	0.20478	0.52961	1.38483	4.1492e-05	0.01409	0.63396	AKAP12
663	piR-57640	hsa_piRNA_4431	DQ590528P	0.23388	0.50675	1.38984	0.0057585	0.13271	1	STAT2
144	piR-40148	hsa_piRNA_21923	DQ572036P	0.27853	0.7416	1.39926	0.00041836	0.04439	1	DNASE1,TRAP1
61	piR-59382	hsa_piRNA_2689	DQ592270P	0.4939	1.35864	1.40775	8.4192e-05	0.02109	1	BMS1,RP11-289H16.1
804	piR-58503	hsa_piRNA_3568	DQ591391P	0.98616	2.71923	1.41046	0.008043	0.15285	1
305	piR-53364	hsa_piRNA_8707	DQ586252P	0.69787	1.74693	1.41805	0.00144332	0.0723	1	RP11-299H22.3
671	piR-55340	hsa_piRNA_6731	DQ588228P	0.15986	0.38168	1.44033	0.0058972	0.13428	1
117	piR-44611	hsa_piRNA_17460	DQ576499P	0.09356	0.24031	1.46739	0.00028058	0.03664	1	TCP10L2,TCP10
560	piR-59076	hsa_piRNA_2995	DQ591964P	0.253	0.65121	1.48648	0.0043034	0.11741	1
108	piR-51209	hsa_piRNA_10862	DQ584097P	0.08431	0.231	1.48969	0.00024488	0.03464	1
449	piR-57737	hsa_piRNA_4334	DQ590625P	0.34585	1.0783	1.50478	0.0030963	0.10536	1
430	piR-45568	hsa_piRNA_16503	DQ577456P	0.46406	1.23223	1.50726	0.002883	0.10244	1
127	piR-45140	hsa_piRNA_16931	DQ577028P	0.64405	1.79127	1.52219	0.00032089	0.03861	1
381	piR-49979	hsa_piRNA_12092	DQ581867P	0.42601	1.27118	1.53403	0.0022783	0.09137	1	AC010084.1
293	piR-30680	hsa_piRNA_31391	DQ570568P	0.11227	0.31746	1.53838	0.00136348	0.0711	1	PRMT8
183	piR-59251	hsa_piRNA_2820	DQ592139P	0.08648	0.26816	1.54441	0.00063965	0.05341	1	TRIM14
512	piR-57406	hsa_piRNA_4665	DQ590294P	0.54556	1.51157	1.55353	0.0037791	0.11278	1
78	piR-57045	hsa_piRNA_5026	DQ589933P	0.11345	0.35017	1.55717	0.000123403	0.02417	1	NPIPA3,NPIPA1
241	piR-54543	hsa_piRNA_7528	DQ587431P	0.08431	0.25264	1.58584	0.00097906	0.06207	1
481	piR-43368	hsa_piRNA_18703	DQ575256P	0.24233	0.78922	1.58595	0.0034162	0.10852	1
235	piR-57610	hsa_piRNA_4461	DQ590498P	0.19233	0.52719	1.59732	0.00095664	0.0622	1	TTC6
88	piR-54824	hsa_piRNA_7247	DQ587712P	0.09498	0.28062	1.61101	0.000163915	0.02846	1	HSPA1B,HSPA1A
379	piR-33844	hsa_piRNA_28227	DQ593732P	0.67576	2.22539	1.61306	0.0022619	0.09119	1
523	piR-40499	hsa_piRNA_21572	DQ572387P	0.0983	0.32272	1.63128	0.0039765	0.11617	1
207	piR-60610	hsa_piRNA_1461	DQ594498P	0.18068	0.64024	1.6417	0.00078192	0.05771	1
411	piR-57307	hsa_piRNA_4764	DQ590195P	0.5112	1.71219	1.67052	0.0026847	0.0998	1	RP1-81D8.3
41	piR-35922	hsa_piRNA_26149	DQ597856P	0.28854	0.91252	1.67058	3.8299e-05	0.01427	0.58517	CTD-2047H16.4,RNF213
63	piR-60683	hsa_piRNA_1388	DQ594571P	0.48903	1.54453	1.67066	9.5092e-05	0.02306	1
145	piR-59043	hsa_piRNA_3028	DQ591931P	0.09348	0.29665	1.67173	0.00042071	0.04433	1	LINC00837
341	piR-51401	hsa_piRNA_10670	DQ584289P	0.30359	0.83574	1.68292	0.00178277	0.07988	1	NOD2
405	piR-58502	hsa_piRNA_3569	DQ591390P	0.5853	2.00576	1.70362	0.0025812	0.09738	1
281	piR-35546	hsa_piRNA_26525	DQ597480P	0.68173	2.22107	1.70425	0.00128104	0.06965	1	RP11-1348G14.4,EIF3C,RP11-57A19.4
798	piR-54294	hsa_piRNA_7777	DQ587182P	2.93166	9.29686	1.70583	0.0079412	0.15205	1	ZNF589
286	piR-59041	hsa_piRNA_3030	DQ591929P	0.15746	0.45487	1.74826	0.00134064	0.07162	1	LINC00837
519	piR-61681	hsa_piRNA_390	DQ595569P	0.6445	2.34503	1.77921	0.0039047	0.11495	1
75	piR-45139	hsa_piRNA_16932	DQ577027P	0.42602	1.53908	1.85658	0.000118119	0.02406	1
21	piR-37251	hsa_piRNA_24820	DQ599185P	0.08431	0.30196	1.86534	1.79956e-05	0.01309	0.27495
487	piR-53868	hsa_piRNA_8203	DQ586756P	1.13885	4.45733	1.88269	0.0035042	0.10994	1	RP11-753D20.1
91	piR-55301	hsa_piRNA_6770	DQ588189P	0.28278	1.02136	1.89792	0.000179636	0.03016	1	RP11-403P17.5,TK2
80	piR-58465	hsa_piRNA_3606	DQ591353P	0.75911	2.78629	1.90499	0.000137893	0.02634	1	CCNB3
46	piR-44781	hsa_piRNA_17290	DQ576669P	0.84223	3.12085	1.91024	4.4433e-05	0.01476	0.67889	RP11-386M24.9
336	piR-55229	hsa_piRNA_6842	DQ588117P	0.09652	0.34347	1.9242	0.00173824	0.07904	1	ACSM1,RP11-108K3.1,AC009784.3,CYP19A1,KIAA1257,ACSM3,ETFA,RP11-723O4.6,NCOA7
228	piR-43724	hsa_piRNA_18347	DQ575612P	0.91741	3.45296	1.94625	0.00090382	0.06057	1
29	piR-41541	hsa_piRNA_20530	DQ573429P	0.09856	0.36594	1.97018	2.1964e-05	0.01157	0.33559	LINC01015
79	piR-60064	hsa_piRNA_2007	DQ593952P	1.0314	3.9228	1.98467	0.000124859	0.02415	1	CTD-2047H16.4,RNF213
155	piR-37250	hsa_piRNA_24821	DQ599184P	0.08431	0.30776	1.99352	0.0004768	0.047	1	RSAD2
186	piR-55300	hsa_piRNA_6771	DQ588188P	0.08431	0.34214	2.0394	0.00065644	0.05392	1
470	piR-57349	hsa_piRNA_4722	DQ590237P	0.48202	1.6538	2.08638	0.0033153	0.10778	1	RP11-266L9.5
201	piR-57585	hsa_piRNA_4486	DQ590473P	0.19212	0.74872	2.08937	0.0007356	0.05592	1	LY6E
422	piR-57739	hsa_piRNA_4332	DQ590627P	0.26617	1.00016	2.09123	0.0028189	0.10206	1
748	piR-35252	hsa_piRNA_26819	DQ597186P	0.37844	1.64646	2.12386	0.0071644	0.14634	1	CTC-559E9.12
602	piR-35947	hsa_piRNA_26124	DQ597881P	0.25393	1.25428	2.16289	0.0049161	0.12477	1	AC133633.2
617	piR-60861	hsa_piRNA_1210	DQ594749P	0.08431	0.46949	2.27908	0.0050997	0.12629	1	NKD1
484	piR-50172	hsa_piRNA_11899	DQ583060P	0.09259	0.49378	2.29917	0.0034753	0.10971	1
534	piR-44818	hsa_piRNA_17253	DQ576706P	0.90818	3.58207	2.35865	0.004102	0.11737	1	TMEM99
90	piR-33637	hsa_piRNA_28434	DQ593525P	0.08728	0.44029	2.36929	0.000178887	0.03037	1	PDXDC1
323	piR-48124	hsa_piRNA_13947	DQ580012P	0.40381	2.274	2.41	0.00161666	0.07647	1	RLIMP2,LRIG2
787	piR-30681	hsa_piRNA_31390	DQ570569P	0.08431	0.51636	2.41649	0.0077014	0.14952	1
418	piR-60848	hsa_piRNA_1223	DQ594736P	0.46376	2.47055	2.42041	0.0027612	0.10093	1
433	piR-49735	hsa_piRNA_12336	DQ581623P	0.1965	1.2092	2.51532	0.002924	0.10318	1
44	piR-49196	hsa_piRNA_12875	DQ581084P	0.23387	1.29366	2.52552	4.0873e-05	0.01419	0.6245	CTC-351M12.1
559	piR-61179	hsa_piRNA_892	DQ595067P	3.81248	20.5809	2.56694	0.0042976	0.11747	1
55	piR-48580	hsa_piRNA_13491	DQ580468P	0.34859	2.10439	2.57106	7.5185e-05	0.02089	1
736	piR-32150	hsa_piRNA_29921	DQ582038P	0.08745	0.59669	2.58332	0.0069028	0.1433	1	TBC1D3P3,TBC1D3P4,USP6
81	piR-59042	hsa_piRNA_3029	DQ591930P	0.08842	0.54184	2.58949	0.000139102	0.02624	1	LINC00837
96	piR-54545	hsa_piRNA_7526	DQ587433P	0.12662	0.7347	2.61794	0.00020174	0.03211	1	RP1-63G5.5
113	piR-57715	hsa_piRNA_4356	DQ590603P	0.20238	1.25602	2.61798	0.00026454	0.03577	1	RP11-753D20.1
132	piR-54544	hsa_piRNA_7527	DQ587432P	0.13226	0.88247	2.65209	0.00035846	0.04149	1	RP1-63G5.5
187	piR-46296	hsa_piRNA_15775	DQ578184P	0.10451	0.61176	2.65263	0.00066154	0.05405	1	LINC00837
378	piR-35633	hsa_piRNA_26438	DQ597567P	0.84961	5.57745	2.66683	0.0022351	0.09034	1	CAND2
169	piR-34592	hsa_piRNA_27479	DQ596526P	0.54033	3.0785	2.77226	0.00054158	0.04896	1
106	piR-31921	hsa_piRNA_30150	DQ571809P	0.08639	0.61178	2.7751	0.00024127	0.03478	1
25	piR-50713	hsa_piRNA_11358	DQ583601P	1.19485	8.15234	2.82735	2.0145e-05	0.01231	0.3078	PWP2
219	piR-59461	hsa_piRNA_2610	DQ592349P	0.76244	5.00688	2.83793	0.00084163	0.05872	1	ZNHIT6
354	piR-54790	hsa_piRNA_7281	DQ587678P	1.29635	9.11853	2.93983	0.00193888	0.08368	1	RP11-29H23.5
124	piR-57716	hsa_piRNA_4355	DQ590604P	0.24544	1.72838	2.95967	0.00030451	0.03752	1	RP11-753D20.1
27	piR-36312	hsa_piRNA_25759	DQ598246P	0.25559	2.06054	2.98195	2.0584e-05	0.01165	0.3145
59	piR-33968	hsa_piRNA_28103	DQ593856P	0.09404	0.72563	2.98611	8.042e-05	0.02083	1	RP11-545A16.3
48	piR-59040	hsa_piRNA_3031	DQ591928P	0.11198	0.91035	3.06116	5.5801e-05	0.01776	0.85258	LINC00837
95	piR-61637	hsa_piRNA_434	DQ595525P	0.60282	5.22604	3.06785	0.000197339	0.03174	1	LINC00964
38	piR-31114	hsa_piRNA_30957	DQ571002P	0.12746	1.07163	3.12351	3.6089e-05	0.01451	0.5514	CHD1L,LINC00624
134	piR-54547	hsa_piRNA_7524	DQ587435P	0.09343	0.88067	3.16853	0.00037805	0.04311	1
51	piR-54546	hsa_piRNA_7525	DQ587434P	0.11591	1.03905	3.22632	5.768e-05	0.01728	0.88129	RP1-63G5.5
369	piR-60602	hsa_piRNA_1469	DQ594490P	0.21762	2.32579	3.31165	0.0021245	0.08797	1
148	piR-50723	hsa_piRNA_11348	DQ583611P	2.93068	29.1056	3.31482	0.000435	0.04491	1
52	piR-54439	hsa_piRNA_7632	DQ587327P	0.1093	1.11612	3.31949	5.8204e-05	0.0171	0.8893	RP11-386M24.3
249	piR-51361	hsa_piRNA_10710	DQ584249P	0.19424	2.19076	3.35641	0.00104303	0.064	1	USP6,TBC1D3P4,TBC1D3P3
165	piR-58809	hsa_piRNA_3262	DQ591697P	0.33408	3.21766	3.38955	0.00051672	0.04785	1
209	piR-54862	hsa_piRNA_7209	DQ587750P	0.38951	4.91826	3.48074	0.00079504	0.05812	1
130	piR-33317	hsa_piRNA_28754	DQ593205P	0.13293	1.56658	3.60465	0.00034096	0.04007	1
146	piR-43353	hsa_piRNA_18718	DQ575241P	0.08959	1.22024	3.71462	0.00042354	0.04432	1
167	piR-61473	hsa_piRNA_598	DQ595361P	0.25629	3.84008	3.74434	0.00052156	0.04772	1
23	piR-54879	hsa_piRNA_7192	DQ587767P	0.08741	1.21865	3.75532	1.93384e-05	0.01285	0.29547
36	piR-42026	hsa_piRNA_20045	DQ573914P	0.11104	1.6632	3.89187	2.4918e-05	0.01058	0.38072	AC093627.9
35	piR-57616	hsa_piRNA_4455	DQ590504P	0.10944	1.51001	3.89605	2.4711e-05	0.01079	0.37756	NBPF11,NBPF12
30	piR-55323	hsa_piRNA_6748	DQ588211P	0.1024	1.43713	3.92685	2.2306e-05	0.01136	0.34081	RNF219-AS1
398	piR-53025	hsa_piRNA_9046	DQ585913P	0.71446	9.27674	3.93246	0.0024998	0.09597	1	CAND2
6	piR-39104	hsa_piRNA_22967	DQ601038P	0.23829	3.72669	3.94948	1.1197e-06	0.00285	0.01711	CTD-2210P24.1
239	piR-43562	hsa_piRNA_18509	DQ575450P	0.12611	2.12195	3.9819	0.00096135	0.06146	1
39	piR-49367	hsa_piRNA_12704	DQ581255P	0.11075	1.78646	4.04789	3.6469e-05	0.01429	0.55721	SUCLG1
66	piR-54343	hsa_piRNA_7728	DQ587231P	0.16319	2.33883	4.09513	0.000101259	0.02344	1	RP11-753D20.1
70	piR-48109	hsa_piRNA_13962	DQ579997P	0.24964	3.77975	4.18741	0.000104732	0.02286	1	MRPL45P1
32	piR-36763	hsa_piRNA_25308	DQ598697P	0.08431	1.51844	4.32989	2.3065e-05	0.01101	0.35241	RP11-20I23.6,PDPK1,AC141586.5,PDPK2P
54	piR-57764	hsa_piRNA_4307	DQ590652P	0.09758	2.92203	4.87414	6.0491e-05	0.01712	0.92424	CTC-523E23.11,CTC-523E23.5
26	piR-54651	hsa_piRNA_7420	DQ587539P	0.24163	7.51144	4.98309	2.0364e-05	0.01197	0.31114	PLEKHB2,PLEKHB2,PLEKHB2,ANKRD18A,ANKRD18A,LINC01087,PLEKHB2,RP11-392E22.11,PLEKHB2,RP11-146D12.2
18	piR-32201	hsa_piRNA_29870	DQ582089P	1.0573	42.5091	5.31696	4.5488e-06	0.00386	0.0695
14	piR-50722	hsa_piRNA_11349	DQ583610P	0.39947	16.0952	5.371	3.0598e-06	0.00334	0.04675	PLEKHB2,PLEKHB2,PLEKHB2,LINC01297,PLEKHB2,PLEKHB2,FAR2P1,ANKRD18A,PLEKHB2,LINC01087,ANKRD18A,RP11-146D12.2,PLEKHB2,PLEKHB2,RP11-392E22.11,PLEKHB2,ANKRD18A,ANKRD18A,PLEKHB2,bP-21264C1.2,RP11-146D12.2
109	piR-45936	hsa_piRNA_16135	DQ577824P	0.1395	5.60992	5.51604	0.00025704	0.03603	1	CTC-523E23.5,CTC-523E23.11
4	piR-32372	hsa_piRNA_29699	DQ582260P	0.211	11.5909	5.75663	6.8892e-07	0.00263	0.01053	LINC01087,ANKRD18A,RP11-392E22.11,RP11-146D12.2,PLEKHB2,ANKRD18A,PLEKHB2,PLEKHB2,PLEKHB2,ANKRD18A,PLEKHB2,PLEKHB2,PLEKHB2,bP-21264C1.2,PLEKHB2,FAR2P1,PLEKHB2,PLEKHB2,RP11-146D12.2,LINC01297,ANKRD18A,PLEKHB2
9	piR-37886	hsa_piRNA_24185	DQ599820P	0.09018	5.50801	5.86328	1.8375e-06	0.00312	0.02808
3	piR-61160	hsa_piRNA_911	DQ595048P	1.02025	104.625	6.61344	4.514e-07	0.0023	0.0069	LINC01087,RP11-146D12.2,PLEKHB2,PLEKHB2,PLEKHB2,PLEKHB2,RP11-146D12.2,PLEKHB2,bP-21264C1.2,PLEKHB2,ANKRD18A,PLEKHB2,PLEKHB2,ANKRD18A,ANKRD18A,ANKRD18A,LINC01297,PLEKHB2,RP11-392E22.11,PLEKHB2
7	piR-47139	hsa_piRNA_14932	DQ579027P	0.28104	36.1565	7.05932	1.4547e-06	0.00318	0.02223
2	piR-61505	hsa_piRNA_566	DQ595393P	1.80731	431.835	7.94734	1.6355e-07	0.00125	0.0025
1	piR-38587	hsa_piRNA_23484	DQ600521P	0.08954	27.1872	8.26409	6.3082e-08	0.00096	0.00096	AP5Z1,FOXK1

## Sheet: S3
l	Name	ID	Accession Number	linear_average_mock	linear_average _time_24h_RSV_infection	log2_linear_average_24h_mock	p_value_24h_mock	benj_0_24	bonf_0_24	TARGETS
49	piR-37981	hsa_piRNA_24090	DQ599915P	3.12083	0.29292	-3.42754	4.7946e-06	0.0015	0.07326	STARD9
156	piR-42627	hsa_piRNA_19444	DQ574515P	1.57973	0.20332	-2.8574	7.9472e-05	0.00778	1
103	piR-46025	hsa_piRNA_16046	DQ577913P	24.7836	3.55372	-2.73621	4.0756e-05	0.00605	0.62271	RP11-259G18.2,RP11-707O23.5
43	piR-30049	hsa_piRNA_32022	DQ569937P	16.418	2.19063	-2.72537	3.5905e-06	0.00128	0.05486	RP11-184C23.4,RP11-613H2.1,RP11-440J4.2
315	piR-41627	hsa_piRNA_20444	DQ573515P	1.4371	0.2096	-2.66907	0.00033632	0.01631	1	NUDT3
21	piR-38945	hsa_piRNA_23126	DQ600879P	1.29435	0.20168	-2.64679	1.2934e-06	0.00094	0.01976	RP4-789D17.3,AGO1
334	piR-32318	hsa_piRNA_29753	DQ582206P	7.93137	0.80693	-2.64068	0.00039659	0.01814	1	LINC01120
35	piR-53794	hsa_piRNA_8277	DQ586682P	3.79134	0.64901	-2.51236	2.7199e-06	0.00119	0.04156	NR2C2,MRPS25
740	piR-50660	hsa_piRNA_11411	DQ583548P	2.59827	0.43978	-2.4514	0.00189999	0.03923	1
153	piR-60132	hsa_piRNA_1939	DQ594020P	22.938	4.46366	-2.31893	7.8815e-05	0.00787	1	RP13-39P12.2
124	piR-42202	hsa_piRNA_19869	DQ574090P	115.544	22.1586	-2.31856	5.6775e-05	0.007	0.86747	SH3PXD2A
52	piR-47513	hsa_piRNA_14558	DQ579401P	17.3726	3.57627	-2.24162	1.50859e-05	0.00443	0.2305	RP11-157B13.8
480	piR-36919	hsa_piRNA_25152	DQ598853P	11.6976	1.74085	-2.22379	0.00075912	0.02416	1	PGBD1
571	piR-45862	hsa_piRNA_16209	DQ577750P	19.5859	3.16565	-2.11637	0.00110354	0.02953	1	AC008280.1,F11-AS1,ACYP2,GOLGA2P11,FIRRE,RP11-215A19.2,CTD-2066L21.3
264	piR-34141	hsa_piRNA_27930	DQ596075P	5.50652	1.24983	-2.07557	0.00025791	0.01493	1	RP11-114H24.2,RP11-114H24.7
832	piR-31757	hsa_piRNA_30314	DQ571645P	3.26879	0.81145	-2.06502	0.0024965	0.04585	1	PRMT8
707	piR-34885	hsa_piRNA_27186	DQ596819P	3.10639	0.50038	-2.06214	0.00176229	0.03808	1	LINC01016
191	piR-48008	hsa_piRNA_14063	DQ579896P	7.76493	1.68776	-2.03597	0.000120211	0.00962	1	NDEL1,MYH10
283	piR-53714	hsa_piRNA_8357	DQ586602P	100.672	22.9408	-2.02061	0.00027901	0.01506	1	PSMB7
1245	piR-45512	hsa_piRNA_16559	DQ577400P	1.33624	0.17614	-2.01022	0.0055239	0.06779	1	RP5-1154L15.2,NINJ2
39	piR-56993	hsa_piRNA_5078	DQ589881P	6.71155	1.67792	-1.98255	3.1706e-06	0.00124	0.04844	RP11-514P8.7,POLR2J3,POLR2J2,RP5-1165K10.2,AC004951.5,RP11-514P8.8,POLR2J4,RP11-514P8.6,UPK3BL
87	piR-38776	hsa_piRNA_23295	DQ600710P	7.37814	1.91265	-1.96928	3.5507e-05	0.00624	0.54251	TSR1,SRR
507	piR-49210	hsa_piRNA_12861	DQ581098P	1.14919	0.27766	-1.95775	0.00087557	0.02639	1	KANTR
141	piR-45856	hsa_piRNA_16215	DQ577744P	13.9511	3.44304	-1.95095	6.3861e-05	0.00692	0.97573
42	piR-42428	hsa_piRNA_19643	DQ574316P	43.9582	12.0447	-1.91717	3.5278e-06	0.00128	0.0539
129	piR-58650	hsa_piRNA_3421	DQ591538P	6.45898	1.62456	-1.91694	5.8731e-05	0.00696	0.89735
170	piR-30796	hsa_piRNA_31275	DQ570684P	6.65169	1.6731	-1.90313	9.5803e-05	0.00861	1
83	piR-31072	hsa_piRNA_30999	DQ570960P	1.21143	0.32627	-1.89046	2.4243e-05	0.00446	0.37041	GOLGA6L9,GOLGA6C,GOLGA2,RP11-114H24.7,RP11-299H22.3,GOLGA6B,RP11-361M10.3,RP11-114H24.2,GOLGA6D,RP11-697E2.12,GOLGA6L5P,GOLGA6D,GOLGA6L10,GOLGA2P8,RP11-1006G14.2,GOLGA6A,RP11-24M17.5,AC068831.10,GOLGA6L17P,GOLGA6L4,GOLGA6L3,GOLGA6L11P,GOLGA6L16P
982	piR-44294	hsa_piRNA_17777	DQ576182P	4.94354	0.8926	-1.88188	0.0032953	0.05127	1	LINC01016
1327	piR-47725	hsa_piRNA_14346	DQ579613P	37.0737	9.39158	-1.86752	0.0063175	0.07274	1
182	piR-45855	hsa_piRNA_16216	DQ577743P	15.1041	3.95049	-1.86549	0.000102409	0.0086	1	TBC1D3P4,TBC1D3P3,RP11-434D2.3
1154	piR-52551	hsa_piRNA_9520	DQ585439P	8.41341	2.11908	-1.8622	0.0047209	0.0625	1	CTC-523E23.5,CTC-523E23.11
56	piR-42425	hsa_piRNA_19646	DQ574313P	31.6464	8.6516	-1.85856	1.61636e-05	0.00441	0.24696	AC016757.3
686	piR-55071	hsa_piRNA_7000	DQ587959P	1.63163	0.32659	-1.85312	0.001638	0.03648	1	RP11-1319K7.1,NAIP
177	piR-58649	hsa_piRNA_3422	DQ591537P	8.75326	2.28045	-1.85048	9.994e-05	0.00863	1
466	piR-59927	hsa_piRNA_2144	DQ592815P	162.821	38.4886	-1.84731	0.00072267	0.02369	1
1332	piR-58501	hsa_piRNA_3570	DQ591389P	26.0301	6.87759	-1.82551	0.0063612	0.07297	1	CTC-523E23.11,CTC-523E23.5
978	piR-42265	hsa_piRNA_19806	DQ574153P	260.811	77.1875	-1.82338	0.0032628	0.05097	1	CYP19A1,RP11-108K3.1
18	piR-40545	hsa_piRNA_21526	DQ572433P	1.04805	0.29935	-1.8106	9.9575e-07	0.00085	0.01521	RP11-164C12.2,RP11-266O8.1
1419	piR-56937	hsa_piRNA_5134	DQ589825P	4.52778	1.32525	-1.78224	0.0072809	0.0784	1	LINC01016
904	piR-56652	hsa_piRNA_5419	DQ589540P	30.1913	8.25793	-1.77967	0.0028438	0.04806	1	RSPH6A
1233	piR-47724	hsa_piRNA_14348	DQ579612P	66.2368	18.4674	-1.77797	0.0054207	0.06717	1	CTC-523E23.11,CTC-523E23.5
581	piR-45240	hsa_piRNA_16831	DQ577128P	4.58355	0.96796	-1.77619	0.00115937	0.03049	1	RP4-610C12.4,RP4-610C12.4
41	piR-38133	hsa_piRNA_23938	DQ600067P	5.63144	1.64401	-1.77399	3.4196e-06	0.00127	0.05225	SLC7A6OS,SLC7A6
46	piR-49675	hsa_piRNA_12396	DQ581563P	2.85816	0.82351	-1.76766	4.1674e-06	0.00138	0.06367
513	piR-49114	hsa_piRNA_12957	DQ581002P	1.7057	0.47676	-1.76328	0.00089532	0.02667	1	LINC01016
1454	piR-44295	hsa_piRNA_17776	DQ576183P	3.00648	0.54123	-1.76127	0.0075966	0.07983	1	LINC01016
496	piR-30841	hsa_piRNA_31230	DQ570729P	2.37947	0.57486	-1.75795	0.00083666	0.02577	1
1380	piR-44296	hsa_piRNA_17775	DQ576184P	2.93865	0.55936	-1.74254	0.0068986	0.07638	1	LINC01016
920	piR-53465	hsa_piRNA_8606	DQ586353P	36.5824	10.863	-1.73755	0.0028981	0.04813	1	RP11-146D12.2
1113	piR-42624	hsa_piRNA_19447	DQ574512P	138.532	40.996	-1.73641	0.0043405	0.05959	1	LINC00905
1213	piR-40373	hsa_piRNA_21698	DQ572261P	1.56515	0.41877	-1.73575	0.0051766	0.0652	1
62	piR-42426	hsa_piRNA_19645	DQ574314P	44.8707	14.0851	-1.72701	1.85455e-05	0.00457	0.28336	AC016757.3
1207	piR-42061	hsa_piRNA_20010	DQ573949P	11.6032	3.24935	-1.71611	0.0050965	0.06451	1	TRIM44
228	piR-30732	hsa_piRNA_31339	DQ570620P	4.65059	1.42871	-1.69903	0.000180588	0.0121	1
509	piR-30345	hsa_piRNA_31726	DQ570233P	1.41623	0.41117	-1.69273	0.00087897	0.02638	1	ERMP1
412	piR-49925	hsa_piRNA_12146	DQ581813P	118.358	36.4095	-1.68733	0.00058399	0.02166	1
1144	piR-43748	hsa_piRNA_18323	DQ575636P	24.7443	7.45983	-1.66258	0.0046412	0.06199	1	RP3-468B3.2
1422	piR-31695	hsa_piRNA_30376	DQ571583P	3.54704	0.75107	-1.66021	0.0073027	0.07847	1
549	piR-42929	hsa_piRNA_19142	DQ574817P	14.5291	4.27906	-1.65424	0.00102452	0.02851	1
68	piR-42427	hsa_piRNA_19644	DQ574315P	57.1392	18.5993	-1.65418	2.074e-05	0.00466	0.31689
93	piR-40791	hsa_piRNA_21280	DQ572679P	9.27268	2.89454	-1.65411	3.7559e-05	0.00617	0.57386	RP13-39P12.2
260	piR-54083	hsa_piRNA_7988	DQ586971P	14.3167	4.74347	-1.63902	0.00024437	0.01436	1	BRCA1
119	piR-45854	hsa_piRNA_16217	DQ577742P	15.2013	4.71817	-1.63783	4.4043e-05	0.00565	0.67293	TBC1D3P4,TBC1D3P3,RP11-434D2.3
880	piR-35079	hsa_piRNA_26992	DQ597013P	4.80613	1.16882	-1.63118	0.0027428	0.04762	1	RP5-1022P6.7,LINC00654
57	piR-42438	hsa_piRNA_19633	DQ574326P	24.3947	7.7841	-1.63078	1.63136e-05	0.00437	0.24926
892	piR-37271	hsa_piRNA_24800	DQ599205P	1.22641	0.33519	-1.62477	0.0027987	0.04794	1	KIAA0319L
288	piR-36107	hsa_piRNA_25964	DQ598041P	5.89944	2.05481	-1.61901	0.00028409	0.01507	1	HIST1H4K,HIST1H4J
696	piR-47826	hsa_piRNA_14245	DQ579714P	2.62679	0.67914	-1.60048	0.00170255	0.03738	1	LINC00905
1561	piR-32846	hsa_piRNA_29225	DQ582734P	2.92881	0.6642	-1.59815	0.0087806	0.08594	1
697	piR-50241	hsa_piRNA_11830	DQ583129P	1.30896	0.36294	-1.59791	0.0017038	0.03735	1	GRIN2A
280	piR-32166	hsa_piRNA_29905	DQ582054P	0.87829	0.27717	-1.59746	0.00027767	0.01515	1
816	piR-43396	hsa_piRNA_18675	DQ575284P	175.871	58.7702	-1.57874	0.0024185	0.04528	1	DNM1P32,DNM1P46,DNM1P50,DNM1P47,DNM1P28
922	piR-47922	hsa_piRNA_14149	DQ579810P	51.5162	17.2413	-1.57054	0.0029218	0.04842	1	CTD-3162L10.1,CTD-3162L10.1
738	piR-31991	hsa_piRNA_30080	DQ571879P	2.56799	0.8244	-1.54443	0.00188437	0.03901	1	GID8
110	piR-31802	hsa_piRNA_30269	DQ571690P	1.05465	0.35251	-1.54382	4.1773e-05	0.0058	0.63825
529	piR-52735	hsa_piRNA_9336	DQ585623P	2.41823	0.81829	-1.53859	0.0009415	0.02719	1	POTEH,POTEG,POTEH,POTEM,POTEE,POTEH,PLEKHB2,POTEM,POTEF,POTEG
395	piR-36202	hsa_piRNA_25869	DQ598136P	12.8919	3.93331	-1.52953	0.00055873	0.02161	1	RP3-468B3.2
1016	piR-45378	hsa_piRNA_16693	DQ577266P	5.75271	1.50629	-1.52496	0.0035245	0.053	1	TBC1D3P4,TBC1D3P3
935	piR-31875	hsa_piRNA_30196	DQ571763P	0.61243	0.18259	-1.49648	0.0029983	0.049	1	RP11-173P15.5,UNC119B
1193	piR-41352	hsa_piRNA_20719	DQ573240P	1.11762	0.38084	-1.48894	0.0050151	0.06423	1	RP11-144G6.12,BMS1P7,BMS1P2,BMS1P1,BMS1P1
579	piR-42933	hsa_piRNA_19138	DQ574821P	0.54569	0.18035	-1.48012	0.00112493	0.02969	1	SLC24A3
475	piR-31751	hsa_piRNA_30320	DQ571639P	7.59523	2.70965	-1.47531	0.00074396	0.02393	1	HIST1H2BC
541	piR-50468	hsa_piRNA_11603	DQ583356P	0.57407	0.19098	-1.47315	0.00098488	0.02782	1	CTNNA2
143	piR-38168	hsa_piRNA_23903	DQ600102P	1.62592	0.59688	-1.46737	6.4892e-05	0.00693	0.99148
1021	piR-47480	hsa_piRNA_14591	DQ579368P	19.9961	7.03591	-1.46628	0.003542	0.05301	1
104	piR-52721	hsa_piRNA_9350	DQ585609P	4.30164	1.5797	-1.45914	4.1072e-05	0.00603	0.62754
602	piR-30905	hsa_piRNA_31166	DQ570793P	1.49223	0.49974	-1.45514	0.00125608	0.03188	1
314	piR-40189	hsa_piRNA_21882	DQ572077P	0.41836	0.15141	-1.4475	0.00033572	0.01634	1	RPA3OS
1396	piR-32305	hsa_piRNA_29766	DQ582193P	205.774	79.8118	-1.43852	0.0070415	0.07707	1
433	piR-50485	hsa_piRNA_11586	DQ583373P	180.157	67.8479	-1.42844	0.00063926	0.02256	1	PLCG1,ZHX3
400	piR-32452	hsa_piRNA_29619	DQ582340P	7.87181	3.13402	-1.42706	0.00056356	0.02153	1	SLC18A1,RP11-108K3.1,CYP19A1
1130	piR-37852	hsa_piRNA_24219	DQ599786P	11.4317	3.53496	-1.42286	0.0045028	0.06088	1
323	piR-50599	hsa_piRNA_11472	DQ583487P	4.98885	1.89214	-1.41762	0.00036006	0.01703	1	RP3-468B3.2
423	piR-41263	hsa_piRNA_20808	DQ573151P	248.391	93.6253	-1.41585	0.00061639	0.02226	1	GOLGA2P10,CSPG4P12,GOLGA2P7,CSPG4P8,RP11-561C5.4
434	piR-39832	hsa_piRNA_22239	DQ601766P	30.0162	10.6837	-1.40803	0.00063931	0.02251	1	NPIPB5,NPIPA3,PDXDC2P,NPIPB3,NPIPB4,SLC35G4P
855	piR-31074	hsa_piRNA_30997	DQ570962P	9.59113	3.27596	-1.4053	0.0026167	0.04676	1
1035	piR-47481	hsa_piRNA_14590	DQ579369P	16.1832	5.90032	-1.40143	0.0036572	0.05399	1
1249	piR-42602	hsa_piRNA_19469	DQ574490P	33.3066	11.5195	-1.39903	0.0055587	0.068	1	CCDC134
257	piR-43793	hsa_piRNA_18278	DQ575681P	0.83103	0.32146	-1.39556	0.00024013	0.01428	1	BACE1
397	piR-44121	hsa_piRNA_17950	DQ576009P	13.0459	5.02702	-1.39405	0.00056205	0.02163	1	RP11-1280N14.3,RP11-848G14.2,RP11-497H16.7,NAIP,RP11-1319K7.1
67	piR-50446	hsa_piRNA_11625	DQ583334P	2.32562	0.8893	-1.39081	2.0422e-05	0.00466	0.31203	HIST1H2AC
870	piR-47029	hsa_piRNA_15042	DQ578917P	41.2371	15.9853	-1.38572	0.0026799	0.04706	1	LINC01120
126	piR-57084	hsa_piRNA_4987	DQ589972P	2.10745	0.81569	-1.38231	5.8227e-05	0.00706	0.88965
231	piR-41301	hsa_piRNA_20770	DQ573189P	76.6054	30.344	-1.37611	0.000181571	0.01201	1	HOXB-AS3,HOXB3
1416	piR-50242	hsa_piRNA_11829	DQ583130P	1.66422	0.51257	-1.37191	0.0072768	0.07852	1	GRIN2A
299	piR-41128	hsa_piRNA_20943	DQ573016P	2.97913	1.16928	-1.35844	0.00031564	0.01613	1	CTNNA3,UBTD1,UBE2D2
1636	piR-57482	hsa_piRNA_4589	DQ590370P	10.0616	2.58963	-1.35822	0.0098216	0.09173	1	NPAP1P6
28	piR-36987	hsa_piRNA_25084	DQ598921P	4.51925	1.76863	-1.35712	2.0356e-06	0.00111	0.0311	ZNF3,ZSCAN21
450	piR-30814	hsa_piRNA_31257	DQ570702P	76.6655	31.0739	-1.34374	0.00068276	0.02318	1	LINC01120
122	piR-31644	hsa_piRNA_30427	DQ571532P	20.0523	7.53472	-1.33777	5.6758e-05	0.00711	0.86721	RP11-299H22.3
218	piR-32405	hsa_piRNA_29666	DQ582293P	80.3444	31.8398	-1.33587	0.000161894	0.01135	1	RP11-329B9.1
73	piR-59855	hsa_piRNA_2216	DQ592743P	4.15007	1.63289	-1.33195	2.1839e-05	0.00457	0.33368
1030	piR-33410	hsa_piRNA_28661	DQ593298P	3.59199	1.40585	-1.33078	0.0035837	0.05316	1
487	piR-61872	hsa_piRNA_199	DQ595760P	0.61457	0.24438	-1.32728	0.00077989	0.02447	1	LINC00837,LINC01517
819	piR-45853	hsa_piRNA_16218	DQ577741P	47.2665	18.532	-1.32103	0.0024205	0.04516	1	RP1-63G5.5
293	piR-60113	hsa_piRNA_1958	DQ594001P	0.54595	0.20889	-1.31714	0.00030002	0.01565	1	VKORC1L1
176	piR-30125	hsa_piRNA_31946	DQ570013P	2.91973	1.17371	-1.31598	9.9084e-05	0.0086	1
358	piR-61476	hsa_piRNA_595	DQ595364P	578.035	235.409	-1.31279	0.00045761	0.01953	1	ZNF689,RP11-146F11.5
96	piR-32011	hsa_piRNA_30060	DQ571899P	0.81875	0.32541	-1.31135	3.8276e-05	0.00609	0.58482	RP11-545A16.3
1285	piR-47944	hsa_piRNA_14127	DQ579832P	13.3221	4.46203	-1.30968	0.0058813	0.06993	1
152	piR-60447	hsa_piRNA_1624	DQ594335P	0.72259	0.28463	-1.30903	7.8682e-05	0.00791	1	TBL2
623	piR-50780	hsa_piRNA_11291	DQ583668P	82.8798	36.572	-1.30457	0.0013443	0.03297	1
1342	piR-58843	hsa_piRNA_3228	DQ591731P	4.24446	1.86296	-1.30182	0.0064435	0.07336	1
659	piR-40742	hsa_piRNA_21329	DQ572630P	1.67098	0.62412	-1.30005	0.00151856	0.03521	1
1023	piR-30119	hsa_piRNA_31952	DQ570007P	7.49373	2.81577	-1.29751	0.0035592	0.05316	1	LINC00674,LRRC37A16P
1071	piR-37851	hsa_piRNA_24220	DQ599785P	179.185	75.9155	-1.28227	0.0039389	0.05619	1	DNM1P32,DNM1P47,DNM1P46,DNM1P28,DNM1P50
783	piR-59369	hsa_piRNA_2702	DQ592257P	0.97042	0.38027	-1.28223	0.002163	0.04221	1
520	piR-54919	hsa_piRNA_7152	DQ587807P	15.9381	5.89383	-1.28097	0.00090458	0.02658	1	RP11-108K3.1,CYP19A1
896	piR-30364	hsa_piRNA_31707	DQ570252P	0.78173	0.29924	-1.27893	0.0028172	0.04804	1	DGCR9,DGCR5
592	piR-37545	hsa_piRNA_24526	DQ599479P	94.7741	39.2986	-1.27827	0.00120481	0.0311	1	GOLGA2P11
838	piR-30742	hsa_piRNA_31329	DQ570630P	35.4122	14.8106	-1.27202	0.0025396	0.0463	1
802	piR-44774	hsa_piRNA_17297	DQ576662P	1.56268	0.56114	-1.27075	0.0023171	0.04414	1	RP11-173P15.5,UNC119B
1151	piR-53516	hsa_piRNA_8555	DQ586404P	0.46046	0.15762	-1.2706	0.0046755	0.06207	1
1356	piR-30056	hsa_piRNA_32015	DQ569944P	0.85378	0.34277	-1.27045	0.0065805	0.07415	1
216	piR-44654	hsa_piRNA_17417	DQ576542P	57.5378	23.7987	-1.26897	0.000160174	0.01133	1
1270	piR-56582	hsa_piRNA_5489	DQ589470P	2.10545	0.79912	-1.26836	0.0057566	0.06926	1
950	piR-33370	hsa_piRNA_28701	DQ593258P	5.22706	2.09715	-1.26122	0.0030791	0.04952	1
764	piR-43981	hsa_piRNA_18090	DQ575869P	0.6017	0.24351	-1.25674	0.002039	0.04078	1
769	piR-30130	hsa_piRNA_31941	DQ570018P	6.2808	2.52892	-1.25372	0.0020621	0.04097	1	RP11-381O7.3,RP11-574E24.3,RP11-574E24.3
310	piR-53459	hsa_piRNA_8612	DQ586347P	59.2291	25.0119	-1.24899	0.00032204	0.01587	1	GOLGA8VP,DNM1P47
490	piR-38060	hsa_piRNA_24011	DQ599994P	26.6081	11.8219	-1.24749	0.00078144	0.02437	1	IMPDH1P6,ATAD2,RP13-39P12.2
213	piR-46961	hsa_piRNA_15110	DQ578849P	0.40191	0.17002	-1.24536	0.000159621	0.01145	1
222	piR-44653	hsa_piRNA_17418	DQ576541P	61.8491	26.0982	-1.24197	0.000163961	0.01128	1
344	piR-38400	hsa_piRNA_23671	DQ600334P	2.11956	0.89512	-1.22703	0.00041872	0.0186	1
616	piR-60027	hsa_piRNA_2044	DQ593915P	8.11659	3.37082	-1.22228	0.00130466	0.03236	1	RP3-468B3.2
1540	piR-35890	hsa_piRNA_26181	DQ597824P	50.8568	21.2695	-1.22155	0.0085417	0.08475	1	RP3-468B3.2
98	piR-32514	hsa_piRNA_29557	DQ582402P	2.84753	1.22497	-1.2199	3.8544e-05	0.00601	0.58891	LINC01015
573	piR-48032	hsa_piRNA_14039	DQ579920P	1.46499	0.54058	-1.21918	0.00111612	0.02976	1	PRMT8
1283	piR-36923	hsa_piRNA_25148	DQ598857P	1.25975	0.43919	-1.21852	0.0058581	0.06976	1
963	piR-38059	hsa_piRNA_24012	DQ599993P	6.93948	3.19511	-1.21663	0.0031975	0.05073	1	IMPDH1P6,RP11-528A10.1,RP13-39P12.2,ATAD2
149	piR-40784	hsa_piRNA_21288	DQ572672P	0.97878	0.41255	-1.20854	7.7855e-05	0.00798	1	RP11-545A16.3
1196	piR-54051	hsa_piRNA_8020	DQ586939P	78.6615	29.6298	-1.20765	0.005023	0.06417	1
815	piR-32212	hsa_piRNA_29859	DQ582100P	2.02896	0.7811	-1.20534	0.0023997	0.04499	1
888	piR-43786	hsa_piRNA_18285	DQ575674P	0.68971	0.27603	-1.20522	0.0027777	0.04779	1	KB-68A7.1
773	piR-31618	hsa_piRNA_30453	DQ571506P	47.1943	22.1269	-1.20342	0.0020987	0.04148	1
352	piR-35741	hsa_piRNA_26330	DQ597675P	0.70257	0.28635	-1.20305	0.00043553	0.0189	1	UNC119B,RP11-173P15.5
987	piR-49541	hsa_piRNA_12530	DQ581429P	0.54638	0.22519	-1.19028	0.0033389	0.05169	1	GOLGA2P11
995	piR-38904	hsa_piRNA_23167	DQ600838P	4.15875	1.79664	-1.18547	0.0033808	0.05191	1	MERTK,DNAJC15,TMEM51-AS1,CLEC6A,LINC00707,CHODL,RP11-234B24.6,LINC00707,RP11-452K12.7,RP5-965G21.4,TTLL3,GALNT8,RP11-1007I13.4,ARL17B,TTC5,TBC1D23,TPRG1,PROM1,REPS2,RRP12
1408	piR-54594	hsa_piRNA_7477	DQ587482P	12.792	5.23964	-1.18218	0.0071245	0.07731	1
1171	piR-49927	hsa_piRNA_12143	DQ581815P	1.01303	0.43272	-1.18205	0.0048012	0.06265	1	NPAP1P6
699	piR-40783	hsa_piRNA_21287	DQ572671P	0.54706	0.23041	-1.17508	0.00171851	0.03756	1	RP11-545A16.3
321	piR-60713	hsa_piRNA_1358	DQ594601P	1.74185	0.71972	-1.16885	0.00035833	0.01706	1	SPECC1,AC004702.2
33	piR-54616	hsa_piRNA_7455	DQ587504P	13.0017	5.80287	-1.16538	2.5649e-06	0.00119	0.03919
26	piR-40442	hsa_piRNA_21629	DQ572330P	8.00301	3.61063	-1.16291	1.6734e-06	0.00098	0.02557
128	piR-33948	hsa_piRNA_28123	DQ593836P	51.2418	22.2486	-1.16259	5.8627e-05	0.007	0.89576	RP11-261C10.8,CICP26,CICP17,RP11-261C10.2,RP11-291L22.4,CICP5,CICP18,LINC00266-3,CICP8,CICP16,CICP9,CICP11,CICP13,AC096582.8,CICP20,CICP24
212	piR-53460	hsa_piRNA_8611	DQ586348P	35.0355	15.5212	-1.1595	0.000159621	0.0115	1	GOLGA8VP,DNM1P47
221	piR-51047	hsa_piRNA_11024	DQ583935P	55.7763	24.6032	-1.15716	0.000162714	0.01125	1
1272	piR-35323	hsa_piRNA_26748	DQ597257P	10.948	4.38762	-1.15498	0.0057582	0.06917	1
97	piR-43418	hsa_piRNA_18653	DQ575306P	1.2592	0.55621	-1.15443	3.833e-05	0.00604	0.58564	LINC01016
165	piR-58036	hsa_piRNA_4035	DQ590924P	204.113	93.3705	-1.154	8.3383e-05	0.00772	1
1004	piR-35022	hsa_piRNA_27049	DQ596956P	0.65577	0.27093	-1.15322	0.0034557	0.05259	1	LRRC37A2,ARL17A,ARL17B,LRRC37A
137	piR-32769	hsa_piRNA_29302	DQ582657P	41.0963	18.4401	-1.15144	6.2625e-05	0.00698	0.95685
712	piR-37865	hsa_piRNA_24206	DQ599799P	3.1393	1.39341	-1.15112	0.00178081	0.03821	1	RP13-580B18.4,RP11-384K6.2,RP11-384K6.6
1243	piR-44193	hsa_piRNA_17878	DQ576081P	1.10358	0.47098	-1.15088	0.0055206	0.06786	1	RP1-63G5.5
1360	piR-52418	hsa_piRNA_9653	DQ585306P	45.5981	22.1054	-1.14815	0.0066196	0.07437	1	KIF1B
1641	piR-30861	hsa_piRNA_31210	DQ570749P	37.666	17.2161	-1.14718	0.0098828	0.09202	1	ANKRD18DP
1325	piR-57483	hsa_piRNA_4588	DQ590371P	2.37826	0.8635	-1.1425	0.0062799	0.07242	1	NPAP1P6
842	piR-49108	hsa_piRNA_12963	DQ580996P	48.6805	23.2196	-1.1412	0.0025448	0.04618	1	GOLGA8K,GOLGA8T,GOLGA8H,GOLGA8UP,GOLGA8O,CTD-2054N24.1,RP11-1000B6.8,GOLGA8J,GOLGA8CP,GOLGA8Q,DNM1P46,GOLGA8S,GOLGA8R,GOLGA8N,GOLGA8F,GOLGA8G,GOLGA8I,GOLGA8EP,GOLGA8M,GOLGA8DP
399	piR-59944	hsa_piRNA_2127	DQ592832P	0.65587	0.29263	-1.13892	0.00056355	0.02158	1	CNOT6L
205	piR-55406	hsa_piRNA_6665	DQ588294P	11.9168	5.40726	-1.13721	0.000139485	0.0104	1
194	piR-32676	hsa_piRNA_29395	DQ582564P	5.75571	2.57025	-1.13648	0.000122087	0.00962	1	STXBP4,LINC00964
1158	piR-35166	hsa_piRNA_26905	DQ597100P	20.3365	9.14328	-1.13572	0.0047395	0.06253	1	C12orf43
766	piR-32729	hsa_piRNA_29342	DQ582617P	0.30147	0.13438	-1.13182	0.0020416	0.04072	1
1532	piR-49206	hsa_piRNA_12865	DQ581094P	0.82076	0.32898	-1.12753	0.008459	0.08436	1	RPL41
1473	piR-53630	hsa_piRNA_8441	DQ586518P	13.1961	5.78141	-1.12349	0.0078384	0.08131	1	NPAP1P6
701	piR-37866	hsa_piRNA_24205	DQ599800P	0.39316	0.1631	-1.12302	0.00173769	0.03787	1	RP11-749H20.1
226	piR-38412	hsa_piRNA_23659	DQ600346P	10.5795	5.02529	-1.12296	0.000179432	0.01213	1
862	piR-32094	hsa_piRNA_29977	DQ581982P	4.47331	2.0153	-1.12053	0.0026438	0.04686	1	GOLGA2P7,CSPG4P12,GOLGA2P10,CSPG4P8
1639	piR-30182	hsa_piRNA_31889	DQ570070P	4.91224	2.2066	-1.1175	0.0098778	0.09208	1	OLFML2B
284	piR-47807	hsa_piRNA_14264	DQ579695P	9.88242	4.42403	-1.11682	0.00028017	0.01507	1	DSP
236	piR-31351	hsa_piRNA_30720	DQ571239P	4.41933	1.9757	-1.11317	0.000198675	0.01286	1	RP1-63G5.5
180	piR-54313	hsa_piRNA_7758	DQ587201P	44.1596	20.1905	-1.1121	0.000101344	0.0086	1
749	piR-50621	hsa_piRNA_11450	DQ583509P	1.36259	0.56756	-1.10796	0.00194233	0.03962	1	AC008132.13,RP11-93O17.2,RP11-346J10.3,POM121L8P,POM121L4P,FAM230B,POM121L7,POM121L9P,RP11-93O17.2,POM121L3P,FAM230B,AC008132.13,POM121L10P,POM121L4P,RP11-93O17.2
1393	piR-40712	hsa_piRNA_21359	DQ572600P	71.6441	36.6222	-1.10429	0.0070204	0.077	1	LINC00930
790	piR-33602	hsa_piRNA_28469	DQ593490P	3.69789	1.69666	-1.0989	0.0022216	0.04297	1	RP13-580B18.4,RP11-384K6.2,RP11-384K6.6
865	piR-34637	hsa_piRNA_27434	DQ596571P	29.2668	13.9529	-1.09633	0.0026761	0.04727	1	NUTM2HP,NUTM2E,NUTM2A,NUTM2D,NUTM2B,NUTM2A-AS1,NUTM2B-AS1
1041	piR-43316	hsa_piRNA_18755	DQ575204P	3.24317	1.47287	-1.09397	0.0036826	0.05405	1	TULP3,RHNO1
1143	piR-32925	hsa_piRNA_29146	DQ582813P	0.61643	0.27557	-1.08987	0.0046364	0.06198	1
1118	piR-30467	hsa_piRNA_31604	DQ570355P	2.21615	0.88153	-1.08672	0.0043987	0.06011	1	ZNF33B
852	piR-47685	hsa_piRNA_14386	DQ579573P	212.862	108.364	-1.08254	0.0026017	0.04666	1	AP000350.10
471	piR-47223	hsa_piRNA_14848	DQ579111P	1.4906	0.65499	-1.08202	0.00073947	0.02399	1	HIST1H4E
413	piR-41910	hsa_piRNA_20161	DQ573798P	1.33714	0.64355	-1.07966	0.00058471	0.02163	1	DNM1P47
1242	piR-58447	hsa_piRNA_3624	DQ591335P	49.2651	23.8473	-1.07781	0.0055176	0.06788	1	RP11-108K3.1,CYP19A1
282	piR-35184	hsa_piRNA_26887	DQ597118P	1.98577	0.93197	-1.07316	0.00027894	0.01511	1
388	piR-41112	hsa_piRNA_20959	DQ573000P	2.89772	1.30926	-1.07182	0.00053784	0.02118	1	RP3-468B3.2
23	piR-38661	hsa_piRNA_23410	DQ600595P	0.43787	0.20729	-1.07139	1.4965e-06	0.00099	0.02287	RP11-753D20.1
1043	piR-44877	hsa_piRNA_17194	DQ576765P	8.6004	3.96413	-1.06731	0.0036968	0.05415	1	ZNF833P
1638	piR-30927	hsa_piRNA_31144	DQ570815P	190.06	84.7261	-1.06026	0.0098767	0.09213	1	CDC27,RP11-183G22.1,RP5-867C24.1
526	piR-52017	hsa_piRNA_10054	DQ584905P	0.76504	0.37276	-1.05796	0.00092338	0.02682	1	RP11-286O1.1
1215	piR-30526	hsa_piRNA_31545	DQ570414P	0.72473	0.29579	-1.05788	0.0051822	0.06517	1	SNX33P1,LINC00905
131	piR-30779	hsa_piRNA_31292	DQ570667P	0.52235	0.24721	-1.05533	5.9415e-05	0.00693	0.9078	RP3-468B3.2
306	piR-50386	hsa_piRNA_11685	DQ583274P	0.2766	0.13438	-1.05378	0.00032137	0.01605	1	WDR77
245	piR-44504	hsa_piRNA_17567	DQ576392P	2.42599	1.17105	-1.05259	0.00021531	0.01343	1	POM121L10P,AC008132.13,POM121L7,FAM230B,POM121L8P,POM121L9P,POM121L1P
989	piR-36930	hsa_piRNA_25141	DQ598864P	0.56926	0.27165	-1.0513	0.0033391	0.05159	1
208	piR-53461	hsa_piRNA_8610	DQ586349P	24.4246	11.6092	-1.05107	0.000155925	0.01145	1	DNM1P47,GOLGA8VP
279	piR-38376	hsa_piRNA_23695	DQ600310P	63.8896	30.6809	-1.04957	0.0002766	0.01515	1	YWHAG
519	piR-31076	hsa_piRNA_30995	DQ570964P	3.71768	1.73676	-1.04784	0.0009041	0.02662	1
353	piR-57170	hsa_piRNA_4901	DQ590058P	36.584	16.6299	-1.04371	0.00043789	0.01895	1	GOLGA2P11
1440	piR-38852	hsa_piRNA_23219	DQ600786P	0.64194	0.24556	-1.04105	0.0074642	0.0792	1	STRN3,PSD3,STAG1,RTN4IP1,ATP10A,STK32A,ATP8B5P
825	piR-30584	hsa_piRNA_31487	DQ570472P	23.5391	10.7288	-1.04022	0.0024582	0.04553	1
1141	piR-30136	hsa_piRNA_31935	DQ570024P	1.18286	0.52653	-1.04004	0.0046167	0.06182	1	SLC7A6,SLC7A6OS
591	piR-36864	hsa_piRNA_25207	DQ598798P	0.66288	0.32035	-1.03955	0.00120031	0.03103	1	RP11-613M10.9,SLC25A51,TMX2P1,TMX2,TMX2-CTNND1
1546	piR-60084	hsa_piRNA_1987	DQ593972P	1.85087	0.73929	-1.0386	0.0086001	0.08499	1
378	piR-44367	hsa_piRNA_17704	DQ576255P	2.02833	0.99609	-1.03847	0.00049666	0.02008	1
663	piR-52452	hsa_piRNA_9619	DQ585340P	0.36478	0.16161	-1.03781	0.00152486	0.03514	1	EEF1A1P8
887	piR-50874	hsa_piRNA_11197	DQ583762P	4.40398	1.96695	-1.0372	0.0027647	0.04762	1	ZFP41,ZFP41
1549	piR-41754	hsa_piRNA_20317	DQ573642P	2.20884	0.92363	-1.03669	0.0086385	0.08521	1	CYP19A1
1276	piR-49961	hsa_piRNA_12110	DQ581849P	0.34361	0.15873	-1.03549	0.0057811	0.06922	1	ENDOG,C9orf114
919	piR-40216	hsa_piRNA_21855	DQ572104P	6.20406	3.06945	-1.03515	0.0028971	0.04817	1	AACSP1,AACS
837	piR-31811	hsa_piRNA_30260	DQ571699P	0.47661	0.21757	-1.03467	0.0025367	0.04631	1	ZNF132
710	piR-52776	hsa_piRNA_9295	DQ585664P	0.52607	0.23957	-1.02969	0.00177714	0.03824	1
758	piR-37830	hsa_piRNA_24241	DQ599764P	0.44298	0.206	-1.02884	0.00199718	0.04026	1
70	piR-46884	hsa_piRNA_15187	DQ578772P	27.6267	13.5485	-1.02869	2.1466e-05	0.00469	0.32798	SUGP1
1493	piR-57880	hsa_piRNA_4191	DQ590768P	1.57468	0.71613	-1.02754	0.0080237	0.08211	1	RP11-1082L8.2,LINC00964
366	piR-38061	hsa_piRNA_24010	DQ599995P	11.6377	5.87694	-1.02263	0.00046268	0.01931	1	IMPDH1P6,ATAD2,RP13-39P12.2
273	piR-54662	hsa_piRNA_7409	DQ587550P	17.6456	8.87208	-1.0189	0.00026204	0.01467	1
123	piR-49021	hsa_piRNA_13050	DQ580909P	116.721	58.9156	-1.01742	5.6768e-05	0.00705	0.86736	LINC00937
918	piR-37455	hsa_piRNA_24616	DQ599389P	0.34307	0.15726	-1.01436	0.002897	0.04822	1
503	piR-35287	hsa_piRNA_26784	DQ597221P	2.53374	1.23465	-1.01354	0.00086027	0.02613	1	RP11-146D12.2,RP11-146D12.2
640	piR-40976	hsa_piRNA_21095	DQ572864P	1.21603	0.59911	-1.01054	0.00144074	0.0344	1	ZNF79
364	piR-61202	hsa_piRNA_869	DQ595090P	0.8539	0.43038	-1.00872	0.00046154	0.01937	1	DPY19L1P1,LINC00997
1341	piR-31192	hsa_piRNA_30879	DQ571080P	442.013	234.597	-1.00754	0.0064187	0.07313	1	RP11-1082L8.2,LINC00964
742	piR-41801	hsa_piRNA_20270	DQ573689P	4.52889	2.21148	-1.00686	0.00192237	0.03958	1	RP3-468B3.2
106	piR-39945	hsa_piRNA_22126	DQ601879P	2.94028	1.4464	-1.0057	4.1142e-05	0.00593	0.62861	SLC35G4P,MAP3K3,CTC-575N7.1,ADAMTS19
626	piR-30760	hsa_piRNA_31311	DQ570648P	1.18441	0.60208	-1.00352	0.00135999	0.03319	1	DNM1P46,CTD-2054N24.1
565	piR-34063	hsa_piRNA_28008	DQ595997P	20.2235	9.84481	-1.0009	0.00108448	0.02933	1	SAYSD1,ANKRD18EP
675	piR-49542	hsa_piRNA_12529	DQ581430P	0.38266	0.18366	-0.99763	0.00158207	0.03581	1	GOLGA2P11
55	piR-49963	hsa_piRNA_12108	DQ581851P	3.05274	1.5243	-0.99755	1.5707e-05	0.00436	0.23999	AGAP1
1000	piR-51371	hsa_piRNA_10700	DQ584259P	1.37426	0.68237	-0.99448	0.0034042	0.05201	1
1331	piR-49151	hsa_piRNA_12920	DQ581039P	1.56971	0.74245	-0.99325	0.0063588	0.07299	1
799	piR-52755	hsa_piRNA_9316	DQ585643P	36.1069	18.2942	-0.98761	0.0022801	0.0436	1	DSP
446	piR-54050	hsa_piRNA_8021	DQ586938P	57.9565	29.1405	-0.98613	0.00066367	0.02274	1	NPAP1P6
881	piR-47921	hsa_piRNA_14150	DQ579809P	0.4561	0.22584	-0.98582	0.0027558	0.04779	1	SNRNP35
2	piR-30353	hsa_piRNA_31718	DQ570241P	3.01432	1.52649	-0.98454	2.201e-07	0.00168	0.00336
1452	piR-35127	hsa_piRNA_26944	DQ597061P	4.97291	2.46683	-0.98429	0.0075839	0.0798	1	RP3-468B3.2
506	piR-60334	hsa_piRNA_1737	DQ594222P	5.42514	2.78878	-0.98229	0.00087534	0.02643	1	RP11-145G20.1,RNF217,TBC1D19,GRIK1
277	piR-43070	hsa_piRNA_19001	DQ574958P	2.29142	1.15936	-0.97959	0.00027547	0.01519	1	RP11-753D20.1
664	piR-56345	hsa_piRNA_5726	DQ589233P	70.5774	34.8397	-0.97911	0.00153613	0.03535	1
1064	piR-48344	hsa_piRNA_13727	DQ580232P	2.77177	1.44808	-0.97719	0.0039162	0.05624	1	RFX3-AS1,CTC-523E23.4,TMEM132B,IPMK,CALCB,AC007319.1
361	piR-42269	hsa_piRNA_19802	DQ574157P	0.99737	0.50143	-0.97693	0.00045871	0.01941	1	TMX2P1,SLC25A51,RP11-613M10.9
1556	piR-37129	hsa_piRNA_24941	DQ599063P	3.87348	2.21643	-0.97572	0.0087232	0.08566	1
678	piR-50484	hsa_piRNA_11587	DQ583372P	2.71374	1.41897	-0.97496	0.00160021	0.03606	1	TUB
1138	piR-39773	hsa_piRNA_22298	DQ601707P	0.90353	0.47294	-0.97331	0.0045634	0.06127	1
303	piR-49463	hsa_piRNA_12608	DQ581351P	2.57804	1.30008	-0.96999	0.00031733	0.016	1	HMGN2,HMGN2P46,CLN6,RP11-798K3.2,HMGN2P47,HMGN2P40,IL36G,HMGN2P41,LCOR,HS3ST4,SV2C,COMMD10
1203	piR-40069	hsa_piRNA_22002	DQ571957P	5.18457	2.6689	-0.96822	0.0050571	0.06423	1
271	piR-44858	hsa_piRNA_17213	DQ576746P	55.287	28.509	-0.96593	0.00026142	0.01474	1	ITGA8,CSGALNACT2
785	piR-32333	hsa_piRNA_29738	DQ582221P	161.856	86.3831	-0.96493	0.0021787	0.04241	1
313	piR-34648	hsa_piRNA_27423	DQ596582P	19.0398	9.72173	-0.96213	0.0003353	0.01637	1	LINC00964
1468	piR-35836	hsa_piRNA_26235	DQ597770P	1.59811	0.77624	-0.95793	0.0077755	0.08093	1
1292	piR-61961	hsa_piRNA_110	DQ595849P	1.00828	0.47611	-0.9572	0.0059643	0.07053	1	ENOSF1
817	piR-34641	hsa_piRNA_27430	DQ596575P	34.1911	18.164	-0.95643	0.0024189	0.04524	1	CTC-523E23.4,CTC-523E23.1
38	piR-31265	hsa_piRNA_30806	DQ571153P	1.77419	0.91921	-0.95399	3.1369e-06	0.00126	0.04793	RP11-299H22.3
224	piR-45500	hsa_piRNA_16571	DQ577388P	0.6654	0.33824	-0.95352	0.000177719	0.01212	1	MBNL2
708	piR-52809	hsa_piRNA_9262	DQ585697P	1.21771	0.58528	-0.9496	0.00176297	0.03805	1
830	piR-32959	hsa_piRNA_29112	DQ582847P	1.22266	0.62359	-0.94795	0.0024818	0.04569	1	GOLGA2P11
926	piR-54224	hsa_piRNA_7847	DQ587112P	25.8855	13.924	-0.94786	0.0029568	0.04879	1	FAR2P1
966	piR-50010	hsa_piRNA_12061	DQ581898P	0.72029	0.38106	-0.94762	0.0032205	0.05094	1	SNX18P23,SNX18P24,SNX18P7
688	piR-36665	hsa_piRNA_25406	DQ598599P	5.96885	2.89813	-0.94644	0.00165695	0.0368	1	RP3-468B3.2
276	piR-32528	hsa_piRNA_29543	DQ582416P	0.47537	0.24231	-0.94614	0.0002751	0.01523	1
1257	piR-39025	hsa_piRNA_23046	DQ600959P	1.53704	0.73628	-0.94255	0.0056246	0.06837	1	GLIS1
120	piR-43355	hsa_piRNA_18716	DQ575243P	47.1555	24.9165	-0.93926	4.4921e-05	0.00572	0.68635	BEND7
508	piR-35911	hsa_piRNA_26160	DQ597845P	5.81679	3.00661	-0.9378	0.00087574	0.02634	1	KIAA1671
387	piR-50801	hsa_piRNA_11270	DQ583689P	1.57399	0.80412	-0.93354	0.00053682	0.02119	1
1596	piR-56298	hsa_piRNA_5773	DQ589186P	16.9697	8.53577	-0.93327	0.0092223	0.08829	1	SPATA8
1368	piR-54382	hsa_piRNA_7689	DQ587270P	0.39123	0.18392	-0.93135	0.0067152	0.075	1	RP11-526D8.7,bP-21264C1.2,ANKRD18A,RP11-392E22.11,ANKRD18A,SNX18P3
788	piR-46860	hsa_piRNA_15211	DQ578748P	8.33347	4.29076	-0.93006	0.0022182	0.04301	1
846	piR-46918	hsa_piRNA_15153	DQ578806P	0.42775	0.21737	-0.92931	0.0025633	0.04629	1	PPP1R8
717	piR-58872	hsa_piRNA_3199	DQ591760P	0.41452	0.21795	-0.92865	0.00180475	0.03846	1
1124	piR-38636	hsa_piRNA_23435	DQ600570P	0.76481	0.40602	-0.92691	0.004439	0.06034	1	CYP19A1,RP11-108K3.1
1182	piR-47187	hsa_piRNA_14884	DQ579075P	55.2352	29.3075	-0.9268	0.0048429	0.0626	1	LINC01206
474	piR-44511	hsa_piRNA_17560	DQ576399P	14.7397	7.84417	-0.92542	0.00074131	0.0239	1	CTD-2054N24.1,DNM1P46,AC090825.1
172	piR-31100	hsa_piRNA_30971	DQ570988P	13.1147	6.84963	-0.92356	9.6992e-05	0.00862	1	IL4I1,NUP62
368	piR-58728	hsa_piRNA_3343	DQ591616P	0.4867	0.24773	-0.92236	0.0004637	0.01925	1
473	piR-40995	hsa_piRNA_21076	DQ572883P	0.45675	0.23681	-0.91872	0.00074	0.0239	1	MEI1
294	piR-37017	hsa_piRNA_25054	DQ598951P	52.6061	27.6883	-0.91353	0.00030012	0.0156	1	EEF1A1,EEF1A1P6,EEF1A1P5,STEAP1B
111	piR-57840	hsa_piRNA_4231	DQ590728P	0.31627	0.16716	-0.91225	4.1945e-05	0.00577	0.64088	UNC119B,RP11-173P15.5
187	piR-56229	hsa_piRNA_5842	DQ589117P	6.72729	3.54078	-0.89738	0.000117815	0.00963	1	ERVH-1,MAML2,AC072062.1,UGP2,RP11-380P13.1,CTD-2058B24.2,MT1A,MGC32805,RP11-359M6.1,FHIT,SERINC5,RP11-325B23.2,NTN4,MIR31HG,AC096559.1,RP5-1139I1.1,GRIP1,RP11-215E13.1,RP11-231E6.1,RP11-256I9.3,MDGA2,RP11-54H7.4,NPSR1-AS1,CP,ZNF600,EIF3E,TBC1D23,RP11-174G6.1,GBE1
1084	piR-31698	hsa_piRNA_30373	DQ571586P	0.9806	0.52984	-0.89621	0.0040037	0.05643	1	LRRC14
1142	piR-39272	hsa_piRNA_22799	DQ601206P	5.65144	2.62599	-0.89176	0.0046202	0.06181	1	RP11-299H22.3,RP11-1O10.1
556	piR-55066	hsa_piRNA_7005	DQ587954P	0.54268	0.28667	-0.88723	0.00107565	0.02956	1	IMPDH1,GRIN2A
805	piR-30834	hsa_piRNA_31237	DQ570722P	16.4908	9.13586	-0.88603	0.0023223	0.04408	1	RP11-386M24.9
651	piR-42059	hsa_piRNA_20012	DQ573947P	0.36651	0.19447	-0.8841	0.00149519	0.03509	1	RPL7P22,CLEC16A,RPL7L1,NR3C1,CTC-347C20.1,RPL7L1P9,RPL7P21,RPL7P46
1210	piR-58272	hsa_piRNA_3799	DQ591160P	1.9167	0.99961	-0.88323	0.0051613	0.06517	1
1072	piR-32101	hsa_piRNA_29970	DQ581989P	1.94444	1.05048	-0.88271	0.0039389	0.05614	1	MGAT4D
60	piR-32314	hsa_piRNA_29757	DQ582202P	10.9613	5.87494	-0.87967	1.78135e-05	0.00454	0.27217	COL4A2,BDH1,RBP7,UBR3,LRRC39
1615	piR-33531	hsa_piRNA_28540	DQ593419P	11.4285	6.33909	-0.87923	0.0095198	0.09006	1
431	piR-50766	hsa_piRNA_11305	DQ583654P	2.7962	1.49673	-0.87819	0.00062376	0.02211	1	ARHGAP27
360	piR-46123	hsa_piRNA_15948	DQ578011P	2.15475	1.17986	-0.87785	0.00045856	0.01946	1	PRAME
849	piR-30448	hsa_piRNA_31623	DQ570336P	0.47395	0.24831	-0.8766	0.0025821	0.04647	1
1247	piR-54167	hsa_piRNA_7904	DQ587055P	6.5314	3.46685	-0.87565	0.0055575	0.06809	1	PLEKHB2,RP11-146D12.2,ANKRD18A,ANKRD18A,RP11-526D8.7,RP11-392E22.11,bP-21264C1.2
718	piR-30676	hsa_piRNA_31395	DQ570564P	31.1751	17.6582	-0.8755	0.00181844	0.0387	1	RP5-1029F21.3,RP5-1029F21.3,RP5-1029F21.3,RP5-1029F21.3,RP5-1029F21.3,RP5-1029F21.3
1604	piR-60030	hsa_piRNA_2041	DQ593918P	7.42294	3.79323	-0.87518	0.0094001	0.08954	1	NUP98
308	piR-58576	hsa_piRNA_3495	DQ591464P	8.44377	4.5455	-0.87461	0.00032181	0.01596	1	CSDE1
585	piR-37097	hsa_piRNA_24974	DQ599031P	1.68918	0.89783	-0.87362	0.00117996	0.03082	1
415	piR-40245	hsa_piRNA_21826	DQ572133P	0.56149	0.29993	-0.87087	0.00059963	0.02208	1	RP11-451H23.3
1046	piR-38448	hsa_piRNA_23623	DQ600382P	1.02615	0.54663	-0.86978	0.003736	0.05457	1
1551	piR-56110	hsa_piRNA_5961	DQ588998P	4.20322	2.01217	-0.86874	0.0086615	0.08532	1	RP11-146D12.2
286	piR-36048	hsa_piRNA_26023	DQ597982P	1.91218	1.02273	-0.86795	0.00028206	0.01507	1	FAM95B1,RP11-146D12.2
1583	piR-38732	hsa_piRNA_23339	DQ600666P	10.8679	5.84619	-0.86769	0.0090204	0.08706	1	NBPF13P,RP13-188A5.1,ABCC2,TRPC6,RP11-267C16.1,RP11-119D9.5,PDE4D
1430	piR-34144	hsa_piRNA_27927	DQ596078P	6.15907	3.25984	-0.86721	0.0074039	0.07911	1	DNM1P47,DNM1P47,DNM1P47,DNM1P47,DNM1P47,DNM1P47,DNM1P46,DNM1P47,DNM1P47,DNM1P47,DNM1P47,DNM1P47,DNM1P47,DNM1P47,DNM1P47,DNM1P47,DNM1P47,DNM1P47,DNM1P47,DNM1P47,DNM1P47,DNM1P47,DNM1P47
721	piR-58708	hsa_piRNA_3363	DQ591596P	0.91825	0.4894	-0.86691	0.00182046	0.03858	1
1127	piR-46848	hsa_piRNA_15223	DQ578736P	2.45551	1.25408	-0.86618	0.0044999	0.06101	1	UGT2B11,CEP83,MGAT4C,CCDC170,DNAJC3-AS1,GSTM2,NBAS,CCER1,CEP128,LMBR1,GSTM1,CTD-2587M2.1,PROS1,HSD17B11,SPAG16,SCN7A,SDK1,CCDC39,ZNF208,EGLN3,GSTM2,CTB-23I7.1,RP11-381I15.1,RABGAP1L,ATP13A4,SLC2A13,LIPI,MYRIP,AF121898.3,CD200R1L,KIF13A,SLC22A3,MIR181A1HG,LINC01170,ACSS3,AJ003147.9,RP11-19C24.1,FAM159B,SLC6A13,CEP128,C4orf45,RP1-274L7.1,ZNF735P,MYO3A,PARD6G,RP11-449D8.1,RP11-275N1.1,GCSHP4,CEP70,R…
1008	piR-39755	hsa_piRNA_22316	DQ601689P	0.73283	0.40585	-0.86573	0.0034796	0.05274	1	TDRG1
88	piR-61450	hsa_piRNA_621	DQ595338P	2.22091	1.21319	-0.86221	3.646e-05	0.00633	0.55707	TMX2P1,RP11-613M10.9,TMX2,SLC25A51,TMX2-CTNND1
1194	piR-59477	hsa_piRNA_2594	DQ592365P	0.32213	0.1673	-0.86193	0.0050153	0.06418	1	AFF3
857	piR-38005	hsa_piRNA_24066	DQ599939P	8.10969	4.63404	-0.86139	0.0026206	0.04672	1	PNPLA7,AC008984.2,ZNF665,EPHA6,KDM3B,ZNF781,EFCAB5,MVB12A,KALP,ANKRD26P1,ERVK3-1,ASMTL,PTPRN2,ARHGAP26,AC006115.3,VPS13C,CTD-2292P10.4,SLCO1B3,TRIP13,ZNF846,MITF,TPK1,TXNRD1,HPSE2,ZNF525,LACTB,SLCO1B3,CTC-459F4.3,EGFEM1P,PTGES2-AS1,ZFP30,SLC27A1,PSG6,ASMTL,USP6NL,BUD31,LSS,RP13-210D15.1,SPAG16,STAG2,RP11-132A1.4,CTD-3131K8.2,PSG7,ZNF665,SGCZ,RPS4Y1,LLNLF-65H9.1,AC010642.1,CTD-2521M24.9
27	piR-40947	hsa_piRNA_21124	DQ572835P	1.11924	0.62409	-0.86021	2.0194e-06	0.00114	0.03085	LINC00905,LLNLF-136C3.1
770	piR-40757	hsa_piRNA_21314	DQ572645P	16.7341	8.40274	-0.85999	0.002076	0.04119	1	CTD-2008P7.6
1324	piR-34284	hsa_piRNA_27787	DQ596218P	49.1514	28.2839	-0.8598	0.0062416	0.07203	1
1513	piR-50414	hsa_piRNA_11657	DQ583302P	20.905	11.8094	-0.85855	0.0083008	0.08383	1
1588	piR-50774	hsa_piRNA_11297	DQ583662P	0.63423	0.33068	-0.8571	0.0090805	0.08737	1	RP11-588H23.3
782	piR-45633	hsa_piRNA_16438	DQ577521P	1.23733	0.67549	-0.85591	0.0021628	0.04226	1
1067	piR-36323	hsa_piRNA_25748	DQ598257P	74.4994	36.1737	-0.85359	0.0039247	0.0562	1	CTD-2139B15.2,FTH1P8,FTH1P10,FTH1P7,FTH1P23,GXYLT2
1391	piR-48179	hsa_piRNA_13892	DQ580067P	11.4359	6.16886	-0.85287	0.0069765	0.07663	1
672	piR-50917	hsa_piRNA_11154	DQ583805P	1.97475	1.07799	-0.85158	0.00157946	0.03591	1
244	piR-43641	hsa_piRNA_18430	DQ575529P	1.30059	0.70446	-0.85134	0.0002151	0.01347	1
1497	piR-37589	hsa_piRNA_24482	DQ599523P	193.022	115.92	-0.85121	0.0080605	0.08227	1	SPATA31B1P,SPATA31C1,SPATA31C2
1470	piR-38863	hsa_piRNA_23208	DQ600797P	21.8371	11.5494	-0.84893	0.0077771	0.08083	1	RP11-366O20.5
127	piR-54761	hsa_piRNA_7310	DQ587649P	6.67962	3.69884	-0.84806	5.8495e-05	0.00704	0.89375	ZNF395
1625	piR-40833	hsa_piRNA_21238	DQ572721P	0.53234	0.26933	-0.84787	0.0096424	0.09066	1	HSD17B11,SLC27A5,TMEM64,KIF13A,ERICH3,TDO2,SCN7A,GSTM2
99	piR-37076	hsa_piRNA_24995	DQ599010P	3.53118	1.94751	-0.84707	3.8815e-05	0.00599	0.59305
469	piR-57601	hsa_piRNA_4470	DQ590489P	40.142	21.8477	-0.84585	0.00073768	0.02403	1	GOLGA8B,GOLGA8A
114	piR-33094	hsa_piRNA_28977	DQ592982P	3.75396	2.0746	-0.84316	4.2333e-05	0.00567	0.64681
1481	piR-32930	hsa_piRNA_29141	DQ582818P	17.9722	10.5355	-0.84281	0.0079215	0.08172	1	PRELID1,WDPCP,MXD3,PRELID1P1,AC016734.2
871	piR-30943	hsa_piRNA_31128	DQ570831P	1.77312	0.91545	-0.8416	0.0026805	0.04702	1
1012	piR-36785	hsa_piRNA_25286	DQ598719P	0.29939	0.1545	-0.84034	0.0035153	0.05307	1	RP13-39P12.3
381	piR-47364	hsa_piRNA_14707	DQ579252P	1.12935	0.6175	-0.84	0.0005047	0.02024	1	RP11-753D20.1
1106	piR-34741	hsa_piRNA_27330	DQ596675P	266.543	162.842	-0.83786	0.004237	0.05853	1	ELFN2,RP1-63G5.5
1478	piR-37461	hsa_piRNA_24610	DQ599395P	57.0957	32.7997	-0.83524	0.0079152	0.08182	1	VASH1,RP11-488C13.5
575	piR-50006	hsa_piRNA_12065	DQ581894P	9.88603	5.70705	-0.83057	0.00111906	0.02974	1	RPS3AP26,RP11-747H12.5,RPS3AP5,RPS3AP25,RP11-489M13.1,RPS3AP39,EPB42,RPS3AP33,SH3D19,RPS3AP29,RPS3AP41,CTD-2026G6.3,RPS3A,RPS3AP14,BAIAP2L1,RPS3AP49,RPS3AP15,RPS3AP35,RPS3AP47,RP11-795H16.3,RP11-379B18.6,RP11-52B19.1,RPS3AP30,RPS3AP6,RPS3AP40,RP13-726E6.2
1279	piR-33917	hsa_piRNA_28154	DQ593805P	0.62906	0.34444	-0.82931	0.0057845	0.0691	1	FAM118A,FAM118A,FAM118A,FAM118A,FAM118A
869	piR-42841	hsa_piRNA_19230	DQ574729P	0.81611	0.44946	-0.82709	0.0026787	0.0471	1
1054	piR-38457	hsa_piRNA_23614	DQ600391P	0.54487	0.29842	-0.82064	0.0038021	0.05512	1	GAS1
897	piR-40150	hsa_piRNA_21921	DQ572038P	67.7091	35.9299	-0.82061	0.0028202	0.04804	1	RP11-1223D19.1,AC013271.3,RP13-1039J1.4
1572	piR-60932	hsa_piRNA_1139	DQ594820P	1.2142	0.6591	-0.82061	0.0089218	0.08672	1	RBPJ,RP11-25H12.1,RAP1GDS1,PARD6G,IGHG3,RASAL2,CEP70,CDC73,TSPAN15,CNNM2,AF121898.3,RP11-325B23.2,CCNG2,KIAA1467,CTD-2587M2.1,CENPP,MANEA,IGHG1,RP11-814P5.1,HSDL2,TRPC7-AS1,RP11-29H23.5,BTBD9,INSL6,TLL1,RP11-275N1.1,SGCZ,SPIDR,LINC01170,BBS4,ATP13A4,RP11-659O3.1,RP11-494M8.4,RP11-704M14.1,C4orf45,MGAT4C,PROS1,SLC2A13,ZRANB2-AS2,KIF13A,AJ003147.9,CCER1,C6,RP11-78F17.1,RP11-19C24.1,ERICH3,RP11-35J1…
1018	piR-46794	hsa_piRNA_15277	DQ578682P	1.04865	0.58803	-0.81978	0.0035393	0.05312	1	RP4-798A10.2
203	piR-31075	hsa_piRNA_30996	DQ570963P	31.1585	17.3263	-0.81495	0.000136959	0.01031	1
909	piR-55285	hsa_piRNA_6786	DQ588173P	15.8734	9.21708	-0.81199	0.0028643	0.04814	1	AP000350.5
36	piR-30752	hsa_piRNA_31319	DQ570640P	2.85831	1.62555	-0.81179	2.9381e-06	0.00125	0.04489	DSP
116	piR-50164	hsa_piRNA_11907	DQ583052P	17.8371	10.157	-0.81118	4.299e-05	0.00566	0.65684
992	piR-54131	hsa_piRNA_7940	DQ587019P	1.25976	0.6716	-0.81051	0.0033449	0.05152	1	RGS17,ELF1,RGS17P1
410	piR-32170	hsa_piRNA_29901	DQ582058P	5.52309	3.1694	-0.80984	0.00058337	0.02174	1	RNMT
811	piR-58479	hsa_piRNA_3592	DQ591367P	1.31782	0.70967	-0.80815	0.00236	0.04446	1	MRPS25,NR2C2
658	piR-40839	hsa_piRNA_21232	DQ572727P	1.3688	0.74406	-0.80801	0.00151667	0.03522	1	CBX5
477	piR-47178	hsa_piRNA_14893	DQ579066P	2.87903	1.63221	-0.80787	0.00075518	0.02419	1	NCOA4
572	piR-39491	hsa_piRNA_22580	DQ601425P	0.97115	0.54888	-0.80492	0.00111503	0.02978	1	AC016757.3
159	piR-57005	hsa_piRNA_5066	DQ589893P	0.57608	0.32883	-0.80442	8.0522e-05	0.00774	1	RP3-468B3.2
911	piR-35938	hsa_piRNA_26133	DQ597872P	3.43638	1.90524	-0.80424	0.0028766	0.04825	1	RP11-753D20.1
1385	piR-52166	hsa_piRNA_9905	DQ585054P	0.64	0.32915	-0.8038	0.0069383	0.07654	1	PRMT1P1,NSD1
1603	piR-41440	hsa_piRNA_20631	DQ573328P	0.29933	0.15793	-0.80328	0.0093776	0.08938	1	RP11-545A16.3
928	piR-50773	hsa_piRNA_11298	DQ583661P	0.31566	0.17889	-0.80151	0.0029597	0.04873	1
355	piR-57925	hsa_piRNA_4146	DQ590813P	24.2616	13.6862	-0.80119	0.00044115	0.01899	1	RP1-63G5.5
981	piR-59914	hsa_piRNA_2157	DQ592802P	1.53408	0.89601	-0.79924	0.0032835	0.05114	1	NPIPB5,RP11-231C14.4,NPIPB4,RP11-347C12.1,NPIPB3
903	piR-53669	hsa_piRNA_8402	DQ586557P	0.59465	0.33858	-0.79752	0.0028435	0.04811	1	TBC1D3P3,TBC1D3P4,RP11-434D2.10
392	piR-45373	hsa_piRNA_16698	DQ577261P	14.3195	8.07338	-0.79736	0.00055595	0.02167	1	CIRBP
85	piR-53892	hsa_piRNA_8179	DQ586780P	2.62393	1.50585	-0.79352	2.458e-05	0.00442	0.37556	LINC00871,RP11-1437A8.6,TP53TG3C,PCP4
112	piR-47132	hsa_piRNA_14939	DQ579020P	3.00552	1.7153	-0.79311	4.2243e-05	0.00576	0.64543	NPM1P6,NPM1P24,CLVS1,DHX35,NPM1P19,NPM1,NPM1P12,OIT3,NPM1P18,NPM1P35
1316	piR-42309	hsa_piRNA_19762	DQ574197P	16.1361	8.57396	-0.79269	0.006205	0.07204	1	TMX2-CTNND1,TMX2,RP11-613M10.9,SLC25A51
268	piR-34204	hsa_piRNA_27867	DQ596138P	3.65998	2.10318	-0.7926	0.00025925	0.01478	1	RP11-299H22.3
1437	piR-31952	hsa_piRNA_30119	DQ571840P	2.27173	1.1998	-0.78832	0.0074389	0.07909	1	TEKT4P2,bP-21264C1.2,AL121756.1,ZNF717,BPIFB3,TEKT4P2,ZNF717
492	piR-53050	hsa_piRNA_9021	DQ585938P	3.72538	2.126	-0.78494	0.00080023	0.02485	1	PLEKHB2
604	piR-57252	hsa_piRNA_4819	DQ590140P	1.61484	0.92989	-0.78388	0.00126135	0.03191	1	LINC00905
1254	piR-30972	hsa_piRNA_31099	DQ570860P	0.56811	0.32739	-0.78363	0.0055985	0.06821	1	TDRG1
1239	piR-41876	hsa_piRNA_20195	DQ573764P	0.31168	0.17101	-0.7814	0.0054816	0.0676	1	CAPS2,GLIPR1L1,SGMS1,RP11-649A16.1,AC092835.2,MDGA2
1406	piR-46163	hsa_piRNA_15908	DQ578051P	7.449	4.22439	-0.77959	0.0071179	0.07735	1	RP11-108K3.1,CYP19A1
510	piR-60843	hsa_piRNA_1228	DQ594731P	10.0366	5.82747	-0.77831	0.00087982	0.02636	1	TMEM183A,RP11-540B6.2
546	piR-61459	hsa_piRNA_612	DQ595347P	6.89869	3.99084	-0.77652	0.00102143	0.02858	1
959	piR-30064	hsa_piRNA_32007	DQ569952P	4.82101	2.74221	-0.77407	0.0031436	0.05008	1
1450	piR-46847	hsa_piRNA_15224	DQ578735P	1.56283	0.87629	-0.774	0.0075593	0.07965	1	HSD17B11,PFN1P11,AF121898.3,RABGAP1L,RP11-679C8.2,CEP83,EGLN3,CTD-2587M2.1,PROS1,ATP13A4,AJ003147.9,LINC01170,RP11-449D8.1,DOCK5,ZRANB2-AS2,TDO2,MTUS1,GALNTL6,SLC22A3,C6,RP11-286B14.1,AC006960.7,CEP128,INSL6,HSDL2,SLC2A13,AC007682.1,RP11-120I21.2,COLEC12,IGHG3,TULP4,LIPI,RTCA-AS1,RP1-274L7.1,TTC6,CEP128,RP11-543H12.1,CENPP,RP11-78F17.1,TLL1,LMLN,SEMA3E,TSPAN15,SPAG16,PTGER2,TMEM71,CCNG2,TULP4,CTC…
999	piR-32301	hsa_piRNA_29770	DQ582189P	3.96662	2.18066	-0.77378	0.0034015	0.05202	1	CIRBP
535	piR-51601	hsa_piRNA_10470	DQ584489P	23.6567	14.637	-0.77298	0.00096239	0.02748	1	PHF1
644	piR-33190	hsa_piRNA_28881	DQ593078P	0.48448	0.26986	-0.77218	0.00145877	0.03461	1	M6PR,PHC1
683	piR-54564	hsa_piRNA_7507	DQ587452P	0.70421	0.4095	-0.76995	0.00161958	0.03623	1	RP11-266O8.1,RP11-164C12.2
703	piR-45381	hsa_piRNA_16690	DQ577269P	34.8826	20.4546	-0.76986	0.0017416	0.03785	1
539	piR-44974	hsa_piRNA_17097	DQ576862P	1.4698	0.8381	-0.76929	0.00097723	0.0277	1	ANKRD11,RP11-282O18.3,CBFA2T3,CUX2,DMD,RP11-430C1.1
884	piR-30368	hsa_piRNA_31703	DQ570256P	48.6677	29.5486	-0.7679	0.0027606	0.04771	1
560	piR-45465	hsa_piRNA_16606	DQ577353P	0.52992	0.30612	-0.76752	0.0010799	0.02946	1	SDCCAG8
498	piR-39223	hsa_piRNA_22848	DQ601157P	10.6088	6.16835	-0.76721	0.00083939	0.02575	1
970	piR-54762	hsa_piRNA_7309	DQ587650P	57.71	33.307	-0.7665	0.0032249	0.0508	1	RP11-408E5.4
1230	piR-34155	hsa_piRNA_27916	DQ596089P	0.47297	0.25985	-0.76516	0.0053974	0.06705	1	TOLLIP
443	piR-48691	hsa_piRNA_13380	DQ580579P	8.23334	4.78932	-0.76359	0.00065887	0.02272	1	RRBP1
1403	piR-52662	hsa_piRNA_9409	DQ585550P	0.63093	0.33865	-0.75644	0.0071019	0.07734	1	U2AF1
157	piR-54928	hsa_piRNA_7143	DQ587816P	1.24543	0.73633	-0.75602	7.9544e-05	0.00774	1	ASB1
1271	piR-50672	hsa_piRNA_11399	DQ583560P	2.85518	1.73432	-0.7544	0.0057573	0.06921	1	LINC01016
1088	piR-31923	hsa_piRNA_30148	DQ571811P	1.83489	1.03766	-0.75195	0.0040207	0.05646	1
1211	piR-30933	hsa_piRNA_31138	DQ570821P	11.022	6.62783	-0.75187	0.0051631	0.06514	1	TACR1
540	piR-44097	hsa_piRNA_17974	DQ575985P	3.46254	2.07696	-0.75127	0.00098337	0.02782	1	EIF3CL,EIF3C,RP11-57A19.4
537	piR-57356	hsa_piRNA_4715	DQ590244P	7.17894	4.2502	-0.74965	0.00096413	0.02743	1	SYT9,CTD-2516F10.2
383	piR-41007	hsa_piRNA_21064	DQ572895P	0.9734	0.57836	-0.74602	0.00052007	0.02075	1
936	piR-47991	hsa_piRNA_14080	DQ579879P	0.29338	0.1725	-0.7457	0.0029993	0.04896	1	SLC25A51,RP11-613M10.9
162	piR-48688	hsa_piRNA_13383	DQ580576P	9.41939	5.68439	-0.74554	8.1987e-05	0.00773	1	TUBB,TUBBP2
1563	piR-55067	hsa_piRNA_7004	DQ587955P	0.3802	0.21415	-0.743	0.0088027	0.08605	1	IMPDH1,GRIN2A
1049	piR-57396	hsa_piRNA_4675	DQ590284P	1.28842	0.7486	-0.74196	0.0037784	0.05503	1	CCDC88C
760	piR-40955	hsa_piRNA_21116	DQ572843P	1.01607	0.61269	-0.73916	0.0020162	0.04053	1
1632	piR-45518	hsa_piRNA_16553	DQ577406P	0.50958	0.29345	-0.73803	0.0097806	0.09157	1	MIF-AS1
1617	piR-50824	hsa_piRNA_11247	DQ583712P	211.105	132.423	-0.7338	0.0095437	0.09018	1	LINC00964,RP11-1082L8.2
1260	piR-32623	hsa_piRNA_29448	DQ582511P	0.68579	0.38952	-0.7337	0.0056564	0.06859	1	AC012487.2
1121	piR-49057	hsa_piRNA_13014	DQ580945P	36.3352	22.6332	-0.73354	0.0044213	0.06026	1
1562	piR-62044	hsa_piRNA_27	DQ595932P	0.6835	0.41404	-0.73262	0.0087953	0.08603	1	GRHL3
787	piR-58065	hsa_piRNA_4006	DQ590953P	14.4302	8.8559	-0.72995	0.0021982	0.04268	1	PPP2R1B
609	piR-47161	hsa_piRNA_14910	DQ579049P	36.9097	21.6056	-0.72899	0.00127954	0.0321	1	FTH1P11,RSF1,FTH1P12,BEST1,FTH1P2,FTH1P21,FTH1,RP11-257P3.3,FTH1P16
1389	piR-30033	hsa_piRNA_32038	DQ569921P	0.25278	0.13438	-0.72812	0.0069631	0.07659	1
587	piR-41034	hsa_piRNA_21037	DQ572922P	5.71027	3.42816	-0.72797	0.00118374	0.03081	1	RP11-386M24.9
660	piR-50154	hsa_piRNA_11917	DQ583042P	1.07383	0.63647	-0.72737	0.00151956	0.03518	1
457	piR-38287	hsa_piRNA_23784	DQ600221P	2.99387	1.80563	-0.72696	0.00069745	0.02332	1
31	piR-54473	hsa_piRNA_7598	DQ587361P	8.69176	5.24956	-0.72599	2.3399e-06	0.00115	0.03575	PMM2,RNF103-CHMP3,NPIPB4,RP11-148I19.1,RP5-965G21.3,KIAA1257,LRCH1,CNTNAP5,NPIPB5,RP11-611E13.2,THEG,PTPRT,RP11-723O4.6,ARFIP1,RP11-611E13.2,CTA-414D7.1,DAB1,PARVB,MED15,RP11-57J16.1,DNAL1,ARFIP1,CHMP3,ATP2C2,C12orf76,KIAA1257,NPIPB3,WDR11-AS1,RP11-723O4.6,RP11-452K12.4,TPTEP1,RP1-122P22.4,IL34
1168	piR-42718	hsa_piRNA_19353	DQ574606P	0.6307	0.36974	-0.72493	0.0047786	0.06251	1	NUTM2D,NUTM2A,NUTM2A-AS1,NUTM2E,NUTM2B-AS1,NUTM2B
1577	piR-55957	hsa_piRNA_6114	DQ588845P	2.70053	1.4685	-0.72271	0.0089836	0.08704	1	AC016747.3,RP11-493E12.3
1145	piR-34296	hsa_piRNA_27775	DQ596230P	0.38501	0.23453	-0.72234	0.0046425	0.06195	1
1269	piR-61341	hsa_piRNA_730	DQ595229P	18.3665	11.8367	-0.72233	0.0057372	0.06908	1	CIRBP
1529	piR-58838	hsa_piRNA_3233	DQ591726P	0.40792	0.24312	-0.72163	0.0084383	0.08432	1	CTC-523E23.4
142	piR-52001	hsa_piRNA_10070	DQ584889P	2.66639	1.60691	-0.7215	6.4756e-05	0.00697	0.98941	EME1,LRRC59
1063	piR-35165	hsa_piRNA_26906	DQ597099P	0.79901	0.46069	-0.72134	0.0039047	0.05612	1
562	piR-47358	hsa_piRNA_14713	DQ579246P	0.63282	0.36498	-0.7194	0.00108113	0.02939	1	CLEC16A
1116	piR-48709	hsa_piRNA_13362	DQ580597P	0.30194	0.17655	-0.71841	0.0043759	0.05991	1
582	piR-61761	hsa_piRNA_310	DQ595649P	2.98232	1.7857	-0.71761	0.00115974	0.03045	1	SMG1P3
1482	piR-57193	hsa_piRNA_4878	DQ590081P	10.5441	6.42273	-0.71691	0.0079351	0.08181	1	RP3-468B3.2
1447	piR-44016	hsa_piRNA_18055	DQ575904P	2.3027	1.31227	-0.7165	0.0075219	0.07942	1	ZDHHC4,AC079742.4
914	piR-54374	hsa_piRNA_7697	DQ587262P	1.36396	0.82313	-0.71564	0.00288	0.04814	1	RP3-468B3.2
826	piR-45672	hsa_piRNA_16399	DQ577560P	4.21575	2.58658	-0.71487	0.0024582	0.04547	1
1526	piR-32972	hsa_piRNA_29099	DQ582860P	0.38921	0.22584	-0.71307	0.0084212	0.08432	1
338	piR-51486	hsa_piRNA_10585	DQ584374P	7.38917	4.51058	-0.71153	0.00040014	0.01809	1
1086	piR-40953	hsa_piRNA_21118	DQ572841P	1.07719	0.65585	-0.71004	0.0040189	0.05654	1
210	piR-31464	hsa_piRNA_30607	DQ571352P	17.2811	10.53	-0.70799	0.00015802	0.0115	1	LIMK2
1209	piR-42274	hsa_piRNA_19797	DQ574162P	0.37832	0.21721	-0.7077	0.0051356	0.0649	1	RP11-1082L8.1,LINC00964,MRS2
767	piR-45372	hsa_piRNA_16699	DQ577260P	0.76384	0.45543	-0.70757	0.0020558	0.04095	1	CAND2
796	piR-35080	hsa_piRNA_26991	DQ597014P	1.98875	1.14426	-0.70634	0.0022432	0.04306	1
823	piR-50367	hsa_piRNA_11704	DQ583255P	1.6082	0.97345	-0.70582	0.0024352	0.04521	1
393	piR-54130	hsa_piRNA_7941	DQ587018P	110.616	67.9349	-0.70382	0.00055803	0.0217	1	CTD-2292P10.4,LY6K
189	piR-44399	hsa_piRNA_17672	DQ576287P	2.08314	1.27291	-0.70373	0.000117871	0.00953	1	FAM225A,FAM225B
755	piR-34093	hsa_piRNA_27978	DQ596027P	78.4807	48.3875	-0.70251	0.00198479	0.04017	1	WNT5B,HYAL4,RAG1,CNTNAP2,CCDC81,RP11-67M9.1,FAM13A,ABCA13,AF121898.3,CNBD1,RP11-349I1.2,CSMD3,ATP1B3,FRRS1,CRADD,GRIK1-AS1,NPR3,GPR116,AC105760.2,RP11-467P22.5,RANP7,PRLR,RP11-301N24.3,LINC01006,LINC01320,RNF212,AC007255.8,VWA3B,PARD3B,CTD-2544M6.1,SPATA6L,AC011288.2,RP11-475A13.2,TENM1,SDK2,RP11-799N11.1,NMNAT3,RP11-415G4.1,RP13-578N3.3,MALRD1,DOCK2,LARGE,RP11-563J2.2,AADACL2-AS1,ANXA10,TPK1,SLC…
72	piR-50760	hsa_piRNA_11311	DQ583648P	8.87631	5.44691	-0.70109	2.1673e-05	0.0046	0.33114
818	piR-37393	hsa_piRNA_24678	DQ599327P	0.58238	0.35105	-0.70053	0.0024192	0.04519	1	SIK2
991	piR-30857	hsa_piRNA_31214	DQ570745P	1.01284	0.62158	-0.70045	0.0033446	0.05157	1
599	piR-58148	hsa_piRNA_3923	DQ591036P	3.53681	2.15014	-0.69935	0.00123975	0.03162	1
420	piR-49215	hsa_piRNA_12856	DQ581103P	0.66999	0.41047	-0.69879	0.00060211	0.0219	1	RP11-580I1.1
907	piR-32288	hsa_piRNA_29783	DQ582176P	1.0086	0.61424	-0.69868	0.0028628	0.04823	1	COG8,VPS4A
905	piR-34659	hsa_piRNA_27412	DQ596593P	31.8836	19.6884	-0.69792	0.0028556	0.04821	1	DDX6
1181	piR-43215	hsa_piRNA_18857	DQ575103P	0.32212	0.19333	-0.69707	0.0048422	0.06265	1
568	piR-54798	hsa_piRNA_7273	DQ587686P	6.05443	3.65907	-0.69697	0.00110166	0.02963	1	GOLGA2P11
1246	piR-48633	hsa_piRNA_13438	DQ580521P	3.19752	1.95472	-0.69579	0.0055423	0.06796	1
406	piR-46423	hsa_piRNA_15648	DQ578311P	1.68515	1.0294	-0.69544	0.00058078	0.02186	1	RP13-39P12.2
751	piR-45812	hsa_piRNA_16259	DQ577700P	0.91544	0.55407	-0.69427	0.001962	0.03992	1
285	piR-54451	hsa_piRNA_7620	DQ587339P	3.57176	2.17053	-0.69318	0.00028172	0.0151	1	EPB41L4A-AS1,EPB41L4A
1564	piR-39636	hsa_piRNA_22435	DQ601570P	0.48304	0.28361	-0.69118	0.0088041	0.08601	1	PQLC1
774	piR-42869	hsa_piRNA_19202	DQ574757P	0.39421	0.24124	-0.6904	0.0020995	0.04144	1	DNM1P47
908	piR-44198	hsa_piRNA_17873	DQ576086P	5.31481	3.25652	-0.68876	0.002863	0.04818	1	FBN2,RP11-242P2.1,CPQ,IQUB,NRXN3,CCDC132,CHRNB4,RP11-526A4.1,RP11-160C18.2,MRPS22,MYRIP,FAM13B,RP11-230G5.2,ABHD12,MALRD1,NREP,ARHGAP25,ZC3H12B,RP11-459O1.2
248	piR-54359	hsa_piRNA_7712	DQ587247P	0.95775	0.59137	-0.6848	0.00022078	0.0136	1
1076	piR-40151	hsa_piRNA_21920	DQ572039P	4.82194	2.82809	-0.68463	0.003959	0.05622	1
772	piR-42174	hsa_piRNA_19897	DQ574062P	0.2209	0.13601	-0.6836	0.0020959	0.04148	1	CTC-523E23.4
1432	piR-30316	hsa_piRNA_31755	DQ570204P	6.10667	3.77085	-0.68157	0.0074046	0.079	1	RP11-108K3.1,CYP19A1
1387	piR-49633	hsa_piRNA_12438	DQ581521P	3.82083	2.31892	-0.68065	0.0069584	0.07665	1	ZKSCAN2
594	piR-35146	hsa_piRNA_26925	DQ597080P	9.70604	6.22266	-0.67975	0.00122035	0.03139	1
737	piR-42484	hsa_piRNA_19587	DQ574372P	7.265	4.54186	-0.67812	0.00188379	0.03905	1
1593	piR-31841	hsa_piRNA_30230	DQ571729P	0.90704	0.583	-0.67728	0.0091793	0.08804	1
856	piR-44236	hsa_piRNA_17835	DQ576124P	0.34023	0.20979	-0.67726	0.0026204	0.04677	1
1288	piR-40364	hsa_piRNA_21707	DQ572252P	0.34749	0.21557	-0.67612	0.0059408	0.07047	1	AC004076.9,ZNF749
698	piR-41567	hsa_piRNA_20504	DQ573455P	0.36293	0.22704	-0.67254	0.00171795	0.03761	1	LINC00674,LRRC37A16P
1640	piR-49034	hsa_piRNA_13037	DQ580922P	1.26199	0.76245	-0.67054	0.0098824	0.09207	1
1579	piR-39791	hsa_piRNA_22280	DQ601725P	66.5237	42.4152	-0.6695	0.0090033	0.08712	1
125	piR-58510	hsa_piRNA_3561	DQ591398P	5.97183	3.74983	-0.66888	5.6807e-05	0.00694	0.86795	PCP4,RP11-1437A8.6,TP53TG3C,RP11-1103G16.1,G2E3
1537	piR-48336	hsa_piRNA_13735	DQ580224P	0.78683	0.43918	-0.66725	0.0084981	0.08448	1	PRMT8
657	piR-53819	hsa_piRNA_8252	DQ586707P	1.03246	0.65919	-0.66723	0.00151642	0.03527	1	C17orf99,MARK4,PPP1R37,EIF5AP2,EIF5AP3,EIF5AP4,EIF5AL1,EIF5A
1089	piR-52140	hsa_piRNA_9931	DQ585028P	0.85111	0.54925	-0.6672	0.0040233	0.05645	1	DNM1P46,CTD-2054N24.1,DNM1P47,GOLGA8VP
516	piR-39986	hsa_piRNA_22085	DQ601920P	0.41264	0.25284	-0.66686	0.00089999	0.02665	1
1458	piR-36722	hsa_piRNA_25349	DQ598656P	2.71448	1.63175	-0.6661	0.0076413	0.08008	1
379	piR-54433	hsa_piRNA_7638	DQ587321P	0.43401	0.26739	-0.66577	0.00049867	0.0201	1	NUTM2A-AS1,NUTM2B-AS1
606	piR-61881	hsa_piRNA_190	DQ595769P	3.23224	2.00208	-0.66531	0.00126243	0.03183	1	RP11-266O8.1
357	piR-31026	hsa_piRNA_31045	DQ570914P	7.72059	4.8611	-0.66509	0.00045737	0.01957	1
667	piR-52200	hsa_piRNA_9871	DQ585088P	37.1041	23.6926	-0.66506	0.00155935	0.03572	1	EEF1A1P9,EEF1A1P33,STEAP1B,EEF1A1P25,EEF1A1,EEF1A1P6,EEF1A1P22,TPK1,EEF1A1P12,EEF1A1P5,EEF1A1P10,PIK3CB,EEF1A1P28
235	piR-33235	hsa_piRNA_28836	DQ593123P	2.00938	1.26127	-0.66465	0.000198307	0.01289	1	FAM225A,FAM225B
266	piR-52137	hsa_piRNA_9934	DQ585025P	1.25257	0.79557	-0.66409	0.00025852	0.01485	1	DNM1P46,CTD-2054N24.1,GOLGA8VP,DNM1P47
753	piR-44668	hsa_piRNA_17403	DQ576556P	0.29398	0.184	-0.66174	0.00196343	0.03984	1	RP11-299H22.4,GOLGA2P11
759	piR-30661	hsa_piRNA_31410	DQ570549P	8.45463	5.25518	-0.6615	0.0020003	0.04027	1	FMNL3
438	piR-32922	hsa_piRNA_29149	DQ582810P	2.44336	1.5362	-0.65995	0.00064324	0.02244	1	LINC01015
533	piR-38062	hsa_piRNA_24009	DQ599996P	4.54004	2.91104	-0.65736	0.00096074	0.02754	1	IMPDH1P6,RP13-39P12.2,ATAD2
1313	piR-32702	hsa_piRNA_29369	DQ582590P	0.4923	0.31635	-0.6568	0.0061761	0.07187	1
386	piR-33236	hsa_piRNA_28835	DQ593124P	2.22167	1.38355	-0.65668	0.0005246	0.02077	1	FAM225B,FAM225A
1620	piR-30915	hsa_piRNA_31156	DQ570803P	5.71656	3.59546	-0.65528	0.0095645	0.09021	1	DNM1P47,GOLGA8VP
1628	piR-52423	hsa_piRNA_9648	DQ585311P	4.31742	2.78583	-0.65523	0.0096967	0.091	1	RP11-350G8.4,RP11-254B13.1,RP11-255H23.4,RP11-255H23.2,RPSA,RP11-350G8.3,RPSAP58
521	piR-30511	hsa_piRNA_31560	DQ570399P	0.42147	0.26471	-0.65403	0.00091706	0.02689	1	MIF-AS1
821	piR-54063	hsa_piRNA_8008	DQ586951P	0.3131	0.19682	-0.65361	0.0024236	0.0451	1	FAM118A
1438	piR-36009	hsa_piRNA_26062	DQ597943P	40.9194	26.5999	-0.65304	0.0074579	0.07924	1	RP11-753D20.1
484	piR-32962	hsa_piRNA_29109	DQ582850P	12.6641	8.00226	-0.6529	0.00076239	0.02407	1	SCAP
1346	piR-42954	hsa_piRNA_19117	DQ574842P	8.30489	5.35287	-0.65274	0.0065175	0.07398	1	LINC01015
234	piR-52677	hsa_piRNA_9394	DQ585565P	1.0991	0.70053	-0.65045	0.000196836	0.01285	1	RGAG4
1206	piR-50899	hsa_piRNA_11172	DQ583787P	23.3983	14.5633	-0.64788	0.0050838	0.06441	1	GOLGA8N,GOLGA6A,GOLGA8CP,RP11-632K20.6,GOLGA8S,GOLGA6L1,GOLGA6D,GOLGA8DP,GOLGA6L6,RP11-1000B6.8,GOLGA6L22,RP11-566K19.9,GOLGA8T,GOLGA8H,GOLGA8UP,GOLGA6C,GOLGA8J,GOLGA6D,GOLGA8I,RP11-483E23.2,GOLGA8O,GOLGA8G,GOLGA8R,GOLGA8K,GOLGA8M,GOLGA8EP,GOLGA8F
161	piR-41797	hsa_piRNA_20274	DQ573685P	3.27342	2.07217	-0.64742	8.1944e-05	0.00778	1	FAM225A,FAM225B
337	piR-58790	hsa_piRNA_3281	DQ591678P	1.56614	0.98378	-0.64718	0.00039793	0.01804	1	DPP10,RP11-6J21.2,GINS3,CTB-13L3.1,RP11-325B23.2,AF121898.3,RP11-822E23.8,RP11-739G5.1,WDPCP,AC034220.3,SERPINB11,ACN9,FAAH2,NBEA,MTND1P29,DNM3,GRAMD1C,RP11-637O19.3,CEP70,SLC22A4,PARD3,DPY19L1P1,MTHFS,HS3ST5,RP11-3J1.1,NDRG3,CEP70,GUSBP6,OAS1,LINC00276,CNTNAP2,SH3PXD2B,LSAMP,RP3-468B3.2,ZNF679,NLGN1,TMPRSS7,SYCP2L,VPS54,PKD2L1,ZRANB3,RP11-506N2.1,ZNF503,OFCC1,RP11-285G1.15,MSR1,LINC01006,ZNF503-…
309	piR-47283	hsa_piRNA_14788	DQ579171P	95.8601	60.354	-0.6453	0.00032182	0.01591	1
732	piR-59856	hsa_piRNA_2215	DQ592744P	0.94405	0.59305	-0.64456	0.00185844	0.03879	1	MIR7161,TMEM181,TATDN2P2
882	piR-32774	hsa_piRNA_29297	DQ582662P	0.59107	0.37967	-0.64211	0.0027583	0.04778	1	RGPD5,RGPD8,RGPD6
470	piR-40949	hsa_piRNA_21122	DQ572837P	1.02028	0.65995	-0.64129	0.00073806	0.02399	1
558	piR-43527	hsa_piRNA_18544	DQ575415P	1.63636	1.05761	-0.64119	0.00107852	0.02953	1	ZNF33B
960	piR-56521	hsa_piRNA_5550	DQ589409P	3.87173	2.33437	-0.63844	0.0031441	0.05004	1
1197	piR-50800	hsa_piRNA_11271	DQ583688P	0.83942	0.52181	-0.63808	0.0050388	0.06432	1	TNFRSF11A
427	piR-56002	hsa_piRNA_6069	DQ588890P	10.7165	6.99079	-0.63797	0.0006214	0.02224	1
894	piR-35331	hsa_piRNA_26740	DQ597265P	2.46915	1.58183	-0.63461	0.0028021	0.04789	1	C20orf27
1560	piR-51546	hsa_piRNA_10525	DQ584434P	14.7328	9.00672	-0.63215	0.0087649	0.08585	1	ZBTB4
1339	piR-48641	hsa_piRNA_13430	DQ580529P	0.95462	0.59066	-0.63145	0.0063969	0.07299	1	WBP2NL
272	piR-30436	hsa_piRNA_31635	DQ570324P	22.3093	14.5445	-0.62853	0.00026186	0.01471	1	CTC-523E23.6
74	piR-54735	hsa_piRNA_7336	DQ587623P	5.79716	3.75064	-0.62853	2.2012e-05	0.00454	0.33632
1394	piR-38256	hsa_piRNA_23815	DQ600190P	5.74115	3.8091	-0.62839	0.0070378	0.07714	1	MIR99AHG,RP11-380P13.1,RP11-498P14.5,ANKRD18CP,CNTNAP2,PMM2,AC073071.1,ERVH-1,CTD-2047H16.4
1443	piR-58944	hsa_piRNA_3127	DQ591832P	270.6	183.925	-0.628	0.0074983	0.07939	1	DNM1P47,GOLGA8VP
863	piR-41526	hsa_piRNA_20545	DQ573414P	0.2835	0.18146	-0.62777	0.0026626	0.04714	1	CSPG4P8,CSPG4P12,DNM1P24,GOLGA2P10,GOLGA2P7,RP11-561C5.4
362	piR-41125	hsa_piRNA_20946	DQ573013P	4.23876	2.77458	-0.6275	0.00045878	0.01936	1
1531	piR-48676	hsa_piRNA_13395	DQ580564P	2.34909	1.42487	-0.62426	0.0084577	0.08441	1	RP11-252A24.2,PDPR
339	piR-44242	hsa_piRNA_17829	DQ576130P	6.78972	4.38605	-0.62262	0.0004006	0.01806	1
997	piR-32015	hsa_piRNA_30056	DQ571903P	0.39784	0.25411	-0.6223	0.0033995	0.0521	1
1175	piR-34901	hsa_piRNA_27170	DQ596835P	0.92658	0.58742	-0.62063	0.0048162	0.06263	1	NHP2,RMND5B
1075	piR-31210	hsa_piRNA_30861	DQ571098P	40.6638	26.5304	-0.62008	0.0039584	0.05626	1	STPG2-AS1,RP11-681L8.1,STPG2,TMCO5A
64	piR-31876	hsa_piRNA_30195	DQ571764P	2.84383	1.845	-0.6197	1.94331e-05	0.00464	0.29692
1570	piR-41941	hsa_piRNA_20130	DQ573829P	0.30181	0.18837	-0.61957	0.0088979	0.08659	1	RFX3-AS1,GRIK2,TMEM132B,CTC-523E23.4,AC007319.1
1273	piR-50469	hsa_piRNA_11602	DQ583357P	1.36125	0.87752	-0.61654	0.0057634	0.06917	1	FAM104A,COG1
391	piR-40948	hsa_piRNA_21123	DQ572836P	1.24629	0.81795	-0.61612	0.00054415	0.02126	1	LINC00905,LLNLF-136C3.1
1492	piR-51110	hsa_piRNA_10961	DQ583998P	9.63549	6.37993	-0.61601	0.0080196	0.08213	1
195	piR-50124	hsa_piRNA_11947	DQ583012P	2.76507	1.80145	-0.61245	0.000123061	0.00964	1	CAND2
607	piR-48963	hsa_piRNA_13108	DQ580851P	1.51324	0.96067	-0.61194	0.00126333	0.0318	1	MAT1A
1238	piR-43914	hsa_piRNA_18157	DQ575802P	1.23398	0.7858	-0.61146	0.0054791	0.06762	1	RP11-723O4.9
365	piR-46835	hsa_piRNA_15236	DQ578723P	0.93212	0.60177	-0.61021	0.00046173	0.01933	1	RP11-834C11.5,RP11-157L3.12,RP11-374M1.4,FLJ12825,RP11-157L3.12,RP11-834C11.6
1427	piR-51303	hsa_piRNA_10768	DQ584191P	1.23402	0.75791	-0.60879	0.0073803	0.07902	1	RP11-753D20.1
553	piR-33057	hsa_piRNA_29014	DQ592945P	1.04927	0.68147	-0.60829	0.00104437	0.02886	1	CIRBP
1541	piR-36718	hsa_piRNA_25353	DQ598652P	0.37673	0.24231	-0.60712	0.0085429	0.0847	1	FAM225B,FAM225A
242	piR-30373	hsa_piRNA_31698	DQ570261P	4.17556	2.76402	-0.60672	0.00020442	0.01291	1	LINC01016
1407	piR-39461	hsa_piRNA_22610	DQ601395P	51.2322	35.0627	-0.60551	0.0071239	0.07736	1	LINC01016
567	piR-32992	hsa_piRNA_29079	DQ582880P	0.6356	0.41705	-0.60533	0.00109991	0.02964	1	TCEB3-AS1,TCEB3
1643	piR-45873	hsa_piRNA_16198	DQ577761P	0.99887	0.65483	-0.60435	0.0099158	0.09221	1	TULP4,RP11-732M18.4
972	piR-57736	hsa_piRNA_4335	DQ590624P	0.361	0.23378	-0.6033	0.0032371	0.05088	1	FAM225A,FAM225B
1204	piR-38130	hsa_piRNA_23941	DQ600064P	0.53704	0.35561	-0.60108	0.0050797	0.06446	1	DNM1P47,GOLGA8VP
422	piR-57746	hsa_piRNA_4325	DQ590634P	27.5846	18.4285	-0.60037	0.00060495	0.0219	1	RP1-63G5.5
899	piR-53344	hsa_piRNA_8727	DQ586232P	42.5796	29.6858	-0.59951	0.0028353	0.04819	1
586	piR-45362	hsa_piRNA_16709	DQ577250P	1.61021	1.06696	-0.59863	0.00118302	0.03085	1	CTD-2054N24.1,DNM1P46
1061	piR-61773	hsa_piRNA_298	DQ595661P	24.7163	16.7513	-0.59862	0.003883	0.05592	1	DNM1P47,DNM1P47,DNM1P47,DNM1P47,DNM1P47,DNM1P47,DNM1P47,DNM1P47,DNM1P47,DNM1P47,DNM1P47,DNM1P47,DNM1P47,DNM1P47,DNM1P47,DNM1P47,DNM1P47,DNM1P47
1087	piR-31663	hsa_piRNA_30408	DQ571551P	1.95061	1.28766	-0.59806	0.0040196	0.0565	1	RP11-753D20.1
425	piR-46425	hsa_piRNA_15646	DQ578313P	1.50133	0.97783	-0.59578	0.00061837	0.02223	1	RP11-299H22.3
71	piR-50866	hsa_piRNA_11205	DQ583754P	6.27737	4.15792	-0.59507	2.1498e-05	0.00463	0.32847
232	piR-60880	hsa_piRNA_1191	DQ594768P	0.79797	0.523	-0.59466	0.000183733	0.0121	1	CH17-264L24.1
1309	piR-33384	hsa_piRNA_28687	DQ593272P	3.95375	2.67827	-0.59081	0.006136	0.07162	1
1058	piR-51027	hsa_piRNA_11044	DQ583915P	2.21513	1.46162	-0.59015	0.0038576	0.05571	1
220	piR-32083	hsa_piRNA_29988	DQ581971P	4.46229	2.95842	-0.58959	0.000162709	0.0113	1	ZKSCAN8
593	piR-36728	hsa_piRNA_25343	DQ598662P	5.51828	3.65121	-0.58785	0.00121583	0.03133	1
639	piR-44933	hsa_piRNA_17138	DQ576821P	4.464	2.9027	-0.58652	0.00143579	0.03433	1	ZNF490
199	piR-33648	hsa_piRNA_28423	DQ593536P	0.98405	0.65349	-0.58546	0.0001245	0.00956	1
1418	piR-56042	hsa_piRNA_6029	DQ588930P	0.74358	0.47884	-0.58511	0.0072808	0.07845	1	PRMT8
184	piR-31077	hsa_piRNA_30994	DQ570965P	0.67333	0.45131	-0.58494	0.000104002	0.00864	1	HTR5BP
483	piR-60249	hsa_piRNA_1822	DQ594137P	0.27981	0.18633	-0.58405	0.00076203	0.02411	1
1251	piR-34345	hsa_piRNA_27726	DQ596279P	0.23875	0.15649	-0.58217	0.0055603	0.06791	1	LINC01016
1080	piR-34593	hsa_piRNA_27478	DQ596527P	0.99661	0.64916	-0.58129	0.0039813	0.05632	1	TRIM61,VPS13A,NPFFR1,RP13-726E6.2,DHRS4-AS1,GSTA3,FHL2,KLRC4-KLRK1,DHRS4L2,CERS6,RP11-277P12.20,SVIL-AS1
763	piR-32330	hsa_piRNA_29741	DQ582218P	2.28885	1.51097	-0.57996	0.0020173	0.0404	1	SBNO1
1528	piR-37657	hsa_piRNA_24414	DQ599591P	0.62686	0.40766	-0.57988	0.008438	0.08437	1	LRRC37A4P
1349	piR-33969	hsa_piRNA_28102	DQ593857P	0.84801	0.55392	-0.57785	0.006535	0.07402	1
898	piR-54752	hsa_piRNA_7319	DQ587640P	39.7558	27.5783	-0.57718	0.0028226	0.04803	1
653	piR-47332	hsa_piRNA_14739	DQ579220P	0.25888	0.17238	-0.57583	0.00149673	0.03502	1
736	piR-59286	hsa_piRNA_2785	DQ592174P	1.67315	1.09854	-0.57516	0.00187923	0.03901	1	RP11-753D20.1
831	piR-53295	hsa_piRNA_8776	DQ586183P	14.3649	9.5549	-0.5733	0.0024834	0.04566	1	RP11-159F24.3,EEF1A1,EEF1A1P6,EEF1A1P19,C5orf34,STEAP1B,CTB-88F18.3,EEF1A1P5
1108	piR-40209	hsa_piRNA_21862	DQ572097P	5.42253	3.54115	-0.57261	0.0042595	0.05874	1	CYP19A1,RP11-108K3.1
1027	piR-34339	hsa_piRNA_27732	DQ596273P	7.87363	5.26076	-0.57242	0.0035786	0.05324	1	RP11-438J1.1,TATDN2
78	piR-30469	hsa_piRNA_31602	DQ570357P	5.64304	3.81386	-0.57206	2.3357e-05	0.00458	0.35687	RP13-39P12.2,ATAD2,IMPDH1P6
1491	piR-41186	hsa_piRNA_20885	DQ573074P	5.67024	3.68418	-0.5718	0.0080171	0.08216	1	CYP19A1,RP11-108K3.1
744	piR-40954	hsa_piRNA_21117	DQ572842P	1.00676	0.66847	-0.56956	0.00192404	0.03951	1
1496	piR-43544	hsa_piRNA_18527	DQ575432P	1.15519	0.78449	-0.5693	0.0080428	0.08214	1
781	piR-37609	hsa_piRNA_24462	DQ599543P	3.50248	2.35833	-0.56914	0.00216	0.04226	1
714	piR-40511	hsa_piRNA_21560	DQ572399P	0.93308	0.61932	-0.56869	0.00179866	0.03849	1	RP11-753D20.1
1637	piR-41881	hsa_piRNA_20190	DQ573769P	1.22811	0.82049	-0.56865	0.0098553	0.09198	1	NBPF6,NBPF4,RP11-444D3.1,NBPF22P
765	piR-50893	hsa_piRNA_11178	DQ583781P	3.11574	2.11468	-0.56554	0.0020403	0.04075	1
1248	piR-45458	hsa_piRNA_16613	DQ577346P	20.3381	14.1603	-0.56514	0.0055579	0.06804	1	AC079922.2,RPS20P35,RP4-575N6.2,RPS20
515	piR-50471	hsa_piRNA_11600	DQ583359P	2.22659	1.4736	-0.56414	0.00089886	0.02667	1
711	piR-59033	hsa_piRNA_3038	DQ591921P	175.743	124.02	-0.56335	0.00177992	0.03825	1
638	piR-37409	hsa_piRNA_24662	DQ599343P	0.66467	0.44898	-0.56311	0.0014237	0.0341	1	CTD-2022H16.3,RP11-143J24.1
94	piR-55682	hsa_piRNA_6389	DQ588570P	2.5417	1.72097	-0.56255	3.7562e-05	0.00611	0.57391	LRRC37A,LRRC37A4P,LRRC37A6P,RP11-156P1.3,LRRC37A16P,LRRC37A2,ARL17A,RP11-85G18.6,LINC00674,ARL17B,LRRC37A3,LRRC37A17P,LRRC37A4P
643	piR-38063	hsa_piRNA_24008	DQ599997P	2.13666	1.44516	-0.56182	0.00145705	0.03462	1
996	piR-33056	hsa_piRNA_29015	DQ592944P	60.3088	40.7087	-0.56124	0.0033849	0.05193	1	RP11-125O5.2,PAGE5,SLCO1B1,C1orf101
912	piR-37917	hsa_piRNA_24154	DQ599851P	0.33782	0.22976	-0.55755	0.0028791	0.04823	1	IFT20
1029	piR-34422	hsa_piRNA_27649	DQ596356P	2.27456	1.4819	-0.55738	0.003583	0.0532	1	RP3-468B3.2
1371	piR-32880	hsa_piRNA_29191	DQ582768P	1.14929	0.75515	-0.55486	0.0067558	0.07529	1	FAM225A,FAM225B
1457	piR-40521	hsa_piRNA_21550	DQ572409P	1.20519	0.7922	-0.55368	0.0076384	0.0801	1
1082	piR-33982	hsa_piRNA_28089	DQ593870P	0.99794	0.67575	-0.55205	0.003984	0.05626	1	RP11-299H22.3
1504	piR-45178	hsa_piRNA_16893	DQ577066P	1.07056	0.72091	-0.5519	0.0081568	0.08286	1	RP3-468B3.2
363	piR-39208	hsa_piRNA_22863	DQ601142P	0.44088	0.31398	-0.55189	0.00045987	0.01936	1	RP11-108K3.1,CYP19A1
631	piR-42625	hsa_piRNA_19446	DQ574513P	15.5917	10.613	-0.55183	0.00140445	0.03401	1	CEP44,DDC,STAG1,FUCA1,EGLN3,ERBB2IP,RP11-114H23.1,CTB-180A7.3,RP11-308D16.2,GPR89B,SPATA5,FIGNL1,ANKRD28,OCLN,AC004448.5,HUS1
1126	piR-42483	hsa_piRNA_19588	DQ574371P	5.95076	4.04049	-0.55125	0.0044953	0.061	1	LLNLF-136C3.1,LINC00905
1229	piR-49288	hsa_piRNA_12783	DQ581176P	1.28284	0.85345	-0.55122	0.0053584	0.06662	1
1370	piR-41190	hsa_piRNA_20881	DQ573078P	0.49409	0.33067	-0.55096	0.0067417	0.07519	1
501	piR-58120	hsa_piRNA_3951	DQ591008P	0.37238	0.25265	-0.55014	0.0008446	0.02576	1
1198	piR-36675	hsa_piRNA_25396	DQ598609P	9.22626	6.23879	-0.54912	0.0050388	0.06426	1
402	piR-54749	hsa_piRNA_7322	DQ587637P	4.62243	3.12585	-0.54802	0.00057599	0.02189	1	MYH14
1253	piR-48246	hsa_piRNA_13825	DQ580134P	0.26749	0.17536	-0.54706	0.0055976	0.06826	1	ARL15
1436	piR-60241	hsa_piRNA_1830	DQ594129P	0.41718	0.27471	-0.54703	0.007424	0.07899	1
1226	piR-30689	hsa_piRNA_31382	DQ570577P	2.59518	1.73387	-0.54222	0.0053238	0.06635	1	EVI5
542	piR-54240	hsa_piRNA_7831	DQ587128P	5.04416	3.4762	-0.54024	0.00098494	0.02777	1
694	piR-57179	hsa_piRNA_4892	DQ590067P	0.54112	0.37234	-0.53949	0.00168468	0.03709	1
1399	piR-30274	hsa_piRNA_31797	DQ570162P	35.2256	25.2264	-0.53876	0.007076	0.07728	1
1275	piR-41047	hsa_piRNA_21024	DQ572935P	0.50694	0.34424	-0.53865	0.0057775	0.06923	1	ZNF425
853	piR-49881	hsa_piRNA_12190	DQ581769P	0.48203	0.33108	-0.53832	0.0026018	0.0466	1	RP11-146D12.2
531	piR-57251	hsa_piRNA_4820	DQ590139P	0.878	0.57312	-0.5372	0.00095786	0.02756	1	LRRC37A,RP11-798G7.6,RP11-798G7.7,ARL17B,LRRC37A2
610	piR-55252	hsa_piRNA_6819	DQ588140P	0.96078	0.65933	-0.53715	0.00128487	0.03218	1
1066	piR-43676	hsa_piRNA_18395	DQ575564P	18.4289	12.863	-0.53572	0.003923	0.05623	1	MROH8,NME7,STIM2,CTC-523E23.4,NCOA7,RP11-736P16.1,ACAP2,ANKRD46,SNORD97,MKX,WDR49,RFX3-AS1,ZFAND3,CTB-12O2.1,GRID2,MARCH1,JAK2,AC007319.1,ZNF316,ADCY10,SDK2,FHIT
813	piR-30637	hsa_piRNA_31434	DQ570525P	0.40488	0.27677	-0.53564	0.0023607	0.04437	1	GOLGA2,RP11-299H22.3
1095	piR-47607	hsa_piRNA_14464	DQ579495P	4.75612	3.27763	-0.53387	0.0040818	0.05696	1
1445	piR-40952	hsa_piRNA_21119	DQ572840P	1.17702	0.81924	-0.53364	0.0075169	0.07948	1
345	piR-36784	hsa_piRNA_25287	DQ598718P	16.4256	11.308	-0.53315	0.00041891	0.01855	1	POLR2J
1400	piR-43007	hsa_piRNA_19064	DQ574895P	0.7283	0.5004	-0.53294	0.0070823	0.07729	1	FAM225B,FAM225A
1097	piR-54325	hsa_piRNA_7746	DQ587213P	0.44026	0.30342	-0.53135	0.0041382	0.05764	1	RP3-468B3.2
1155	piR-52702	hsa_piRNA_9369	DQ585590P	5.27278	3.70655	-0.52998	0.0047237	0.06249	1
318	piR-35416	hsa_piRNA_26655	DQ597350P	3.03981	2.09194	-0.52942	0.00033827	0.01625	1
617	piR-39647	hsa_piRNA_22424	DQ601581P	1.05285	0.70674	-0.5291	0.00130482	0.03231	1
102	piR-47615	hsa_piRNA_14456	DQ579503P	8.19047	5.68295	-0.52872	4.0464e-05	0.00606	0.61825
633	piR-47820	hsa_piRNA_14251	DQ579708P	1.65523	1.14193	-0.5279	0.00141637	0.03419	1	C12orf45,RP11-295G12.1,KIAA1143,ADCY9,FARS2,RP11-624C23.1
569	piR-46387	hsa_piRNA_15684	DQ578275P	2.93888	2.03773	-0.52776	0.00110273	0.02961	1	CTC-523E23.4,CTC-523E23.1
1515	piR-60675	hsa_piRNA_1396	DQ594563P	0.51295	0.35734	-0.52739	0.0083218	0.08393	1	PRMT8
92	piR-54358	hsa_piRNA_7713	DQ587246P	1.04009	0.71873	-0.52708	3.7084e-05	0.00616	0.56661	RP3-468B3.2,LINC01016
889	piR-33680	hsa_piRNA_28391	DQ593568P	4.04817	2.77395	-0.52639	0.002779	0.04776	1
695	piR-42236	hsa_piRNA_19835	DQ574124P	2.9015	1.99446	-0.52627	0.00169725	0.03731	1	CTC-523E23.4
1125	piR-31558	hsa_piRNA_30513	DQ571446P	1.81999	1.28052	-0.52484	0.0044561	0.06052	1
1523	piR-33532	hsa_piRNA_28539	DQ593420P	0.461	0.31473	-0.52432	0.0083821	0.08409	1	C16orf45
1190	piR-42811	hsa_piRNA_19260	DQ574699P	27.1777	19.1744	-0.5242	0.0049449	0.06349	1	RIN3
1340	piR-35936	hsa_piRNA_26135	DQ597870P	0.71777	0.49352	-0.52205	0.0064009	0.07298	1
270	piR-30268	hsa_piRNA_31803	DQ570156P	1.45892	1.00788	-0.51881	0.00026115	0.01478	1	STEAP2-AS1,DPY19L2P4,DPY19L2P2,RP5-1121E10.2,DPY19L2P1
148	piR-30267	hsa_piRNA_31804	DQ570155P	3.65916	2.55448	-0.51572	7.7586e-05	0.00801	1	FAM225B,FAM225A
1507	piR-50671	hsa_piRNA_11400	DQ583559P	3.3695	2.37235	-0.51404	0.0081834	0.08297	1
1487	piR-61707	hsa_piRNA_364	DQ595595P	1040.12	792.101	-0.51394	0.0079787	0.08198	1
428	piR-58037	hsa_piRNA_4034	DQ590925P	0.42814	0.29951	-0.51192	0.0006224	0.02222	1	NBPF12,NBPF25P,NOTCH2NL,NBPF11,NBPF14,NBPF9,NBPF9
1305	piR-45548	hsa_piRNA_16523	DQ577436P	2.09284	1.3892	-0.51189	0.0061006	0.07143	1	FAM225B,FAM225A
479	piR-35268	hsa_piRNA_26803	DQ597202P	3.50406	2.49184	-0.51054	0.00075704	0.02415	1
456	piR-47901	hsa_piRNA_14170	DQ579789P	0.53267	0.37502	-0.51	0.00069665	0.02334	1	SV2B
596	piR-43660	hsa_piRNA_18411	DQ575548P	25.9289	18.5071	-0.50677	0.00122468	0.0314	1	LINC01016
1096	piR-30493	hsa_piRNA_31578	DQ570381P	0.88547	0.61412	-0.50474	0.0040831	0.05692	1	RP11-19N8.2
798	piR-36641	hsa_piRNA_25430	DQ598575P	1.93237	1.36094	-0.50401	0.0022761	0.04358	1
1256	piR-45173	hsa_piRNA_16898	DQ577061P	0.98187	0.66633	-0.50344	0.0056209	0.06838	1	RP11-1000B6.3,RP11-578F21.6,AC026150.8,GOLGA8M
875	piR-60533	hsa_piRNA_1538	DQ594421P	2.87366	2.06606	-0.50166	0.0027042	0.04722	1	RP1-37N7.1,EVPLL
1059	piR-35520	hsa_piRNA_26551	DQ597454P	3.92581	2.75763	-0.49937	0.003859	0.05568	1	DNM1P46,GOLGA8VP,CTD-2054N24.1,DNM1P47
1100	piR-43214	hsa_piRNA_18856	DQ575102P	1.08792	0.76396	-0.49908	0.0041796	0.05805	1	DNM1P47,DNM1P47,DNM1P47,DNM1P47,DNM1P47,DNM1P47,DNM1P47,DNM1P47,DNM1P47,DNM1P47,DNM1P47,DNM1P47,DNM1P47,DNM1P47,DNM1P47,DNM1P47,DNM1P47,DNM1P47,DNM1P47,DNM1P47,DNM1P47,DNM1P47,DNM1P47,DNM1P47,DNM1P47,DNM1P47,DNM1P47,DNM1P47,DNM1P47,DNM1P47,DNM1P47,DNM1P47,DNM1P47,DNM1P47,DNM1P47,DNM1P47,DNM1P47,DNM1P47,DNM1P46,DNM1P47,DNM1P47,DNM1P47
860	piR-35269	hsa_piRNA_26802	DQ597203P	2.74915	1.97653	-0.49878	0.0026236	0.04661	1
1038	piR-30109	hsa_piRNA_31962	DQ569997P	3.53344	2.44196	-0.49833	0.0036784	0.05414	1	CTC-559E9.9
1092	piR-54239	hsa_piRNA_7832	DQ587127P	3.19947	2.26741	-0.49797	0.004063	0.05685	1
656	piR-35857	hsa_piRNA_26214	DQ597791P	2.11301	1.45581	-0.49697	0.0015158	0.0353	1	RP11-57A19.4,RP11-57A19.5,PLA2G10,RP11-231C14.5,RP11-72I8.1,NPIPA3,RP11-719K4.3,RP11-1348G14.7,RP11-347C12.8,RP11-435I10.6,RP11-72I8.2,RP11-1212A22.7,PDXDC1,CTB-134H23.3
1442	piR-56192	hsa_piRNA_5879	DQ589080P	0.80788	0.56149	-0.4943	0.007496	0.07943	1	RP11-299H22.3
1522	piR-49400	hsa_piRNA_12671	DQ581288P	0.54149	0.37109	-0.49312	0.0083775	0.0841	1	FOXP2,C1orf141,ENTPD1,ST13P12,LINC00669,RP11-170M17.1,TBL1Y,CTD-2140G10.2,WDR49,RP11-754N21.1,RPS6KA2,ACOX3,ACTN4,IL1RAPL2,ANKRD55,CTB-186G2.4,CNGA1,CD72,SLC18A1,IGHM,IGHG1,RAB27A,LINC00511,RPS11P6,MYO5A,RP11-108K3.1,C12orf56,PIN4,AC007250.4,TBL1Y,RP11-171L9.1,PARPBP,CYP19A1,ERCC6L,RP11-22H5.2,RP11-789C2.1,IGHG3,LINC01339,RP11-514O12.4,CLVS1,NIPAL1,RP5-1139I1.1,RNF219-AS1,RP5-964N17.1,RP11-404I7.…
376	piR-35967	hsa_piRNA_26104	DQ597901P	3.24842	2.28719	-0.4922	0.00049538	0.02013	1	MOB1B,DCK,LINC00654,KB-1458E12.1
455	piR-48575	hsa_piRNA_13496	DQ580463P	2.59055	1.82182	-0.49178	0.00069636	0.02338	1
1202	piR-60559	hsa_piRNA_1512	DQ594447P	6.21874	4.43289	-0.49141	0.0050569	0.06428	1	TMEM132B,AC007319.1,CTC-523E23.4,RFX3-AS1,MKX,WDR49
1011	piR-40194	hsa_piRNA_21877	DQ572082P	1.03314	0.72014	-0.49112	0.0035017	0.05292	1	LINC00905,LLNLF-136C3.1
845	piR-42237	hsa_piRNA_19834	DQ574125P	4.8086	3.39823	-0.491	0.0025613	0.04631	1
1274	piR-37788	hsa_piRNA_24283	DQ599722P	0.33606	0.2354	-0.49064	0.0057772	0.06929	1
1398	piR-55843	hsa_piRNA_6228	DQ588731P	3.11652	2.17713	-0.48867	0.0070599	0.07716	1	LINC01120
1184	piR-30773	hsa_piRNA_31298	DQ570661P	1.37032	0.93244	-0.48766	0.0048605	0.06272	1	CYP19A1,RP11-108K3.1
1431	piR-53628	hsa_piRNA_8443	DQ586516P	0.80598	0.58257	-0.48756	0.0074042	0.07906	1	TBC1D20
482	piR-47585	hsa_piRNA_14486	DQ579473P	0.51081	0.36096	-0.4871	0.00076078	0.02412	1	PTBP1
647	piR-48915	hsa_piRNA_13156	DQ580803P	2.59793	1.83448	-0.48635	0.00147512	0.03484	1	NUTM2F,NUTM2G,HIATL2
356	piR-51383	hsa_piRNA_10688	DQ584271P	2.45535	1.75526	-0.48326	0.00044321	0.01902	1	RP11-347C12.1,NPIPB4,NPIPB8,PDXDC2P,NPIPB6,NPIPB3,NPIPB11,RP11-419C5.2,NPIPB5,RP11-231C14.4,NPIPB9
1074	piR-47319	hsa_piRNA_14752	DQ579207P	1.4681	1.0456	-0.48326	0.0039568	0.05629	1
240	piR-62051	hsa_piRNA_20	DQ595939P	3.37166	2.40439	-0.47896	0.00020291	0.01292	1	IQCH,IQCH-AS1
1429	piR-40864	hsa_piRNA_21207	DQ572752P	0.30063	0.20587	-0.47837	0.0074024	0.07915	1	LINC00964
223	piR-57312	hsa_piRNA_4759	DQ590200P	3.73768	2.67048	-0.47826	0.000176959	0.01212	1
662	piR-35342	hsa_piRNA_26729	DQ597276P	19.9127	13.8142	-0.47729	0.00152434	0.03518	1
1057	piR-43148	hsa_piRNA_18923	DQ575036P	3.20318	2.34433	-0.47689	0.0038554	0.05573	1	RPS7P11,RPS7P14,RPS7P10,NSF,RPS7
1240	piR-32203	hsa_piRNA_29868	DQ582091P	3.81141	2.69082	-0.47664	0.0055	0.06777	1	TDRG1
1501	piR-43093	hsa_piRNA_18978	DQ574981P	1.72725	1.22132	-0.47482	0.0081352	0.08281	1	LETM1
1348	piR-30026	hsa_piRNA_32045	DQ569914P	2.05749	1.43935	-0.47374	0.0065247	0.07395	1	CYP19A1,RP11-108K3.1
214	piR-54765	hsa_piRNA_7306	DQ587653P	71.1045	50.9094	-0.47324	0.000159813	0.01141	1
1543	piR-33213	hsa_piRNA_28858	DQ593101P	1.25903	0.89889	-0.47279	0.0085764	0.08492	1
382	piR-30118	hsa_piRNA_31953	DQ570006P	5.6742	4.10398	-0.47262	0.00051534	0.02061	1	CRAMP1L,LA16c-431H6.6
1303	piR-40950	hsa_piRNA_21121	DQ572838P	1.12321	0.81216	-0.47007	0.0060952	0.07147	1	LINC00905,LLNLF-136C3.1
1306	piR-51262	hsa_piRNA_10809	DQ584150P	2.63581	1.87904	-0.46939	0.0061047	0.07142	1	MGAT3
89	piR-39993	hsa_piRNA_22078	DQ601927P	4.06104	2.93104	-0.4692	3.667e-05	0.0063	0.56028	TERF2
408	piR-43735	hsa_piRNA_18336	DQ575623P	3.29039	2.35565	-0.46831	0.00058251	0.02181	1	RP11-438J1.1,TATDN2
328	piR-33814	hsa_piRNA_28257	DQ593702P	0.99527	0.71743	-0.46646	0.0003801	0.01771	1
1069	piR-30337	hsa_piRNA_31734	DQ570225P	2.29785	1.64195	-0.46569	0.0039358	0.05625	1
1506	piR-43245	hsa_piRNA_18826	DQ575133P	0.42597	0.30141	-0.46568	0.0081798	0.08299	1	GOLGA6D,GOLGA6D,RP11-160C18.2,GOLGA6C,RP11-24M17.5,GOLGA6B,GOLGA6A
722	piR-47522	hsa_piRNA_14549	DQ579410P	1.40108	1.01012	-0.46517	0.00182064	0.03853	1	RP3-468B3.2
839	piR-47335	hsa_piRNA_14736	DQ579223P	1.45829	1.02757	-0.4628	0.0025415	0.04628	1	LINC01016
1377	piR-49440	hsa_piRNA_12631	DQ581328P	0.93341	0.66455	-0.46277	0.0068401	0.0759	1
750	piR-55251	hsa_piRNA_6820	DQ588139P	1.13932	0.82838	-0.46181	0.00196057	0.03994	1
530	piR-49813	hsa_piRNA_12258	DQ581701P	1.49792	1.08085	-0.46128	0.000957	0.02759	1
237	piR-56066	hsa_piRNA_6005	DQ588954P	13.0512	9.42648	-0.46101	0.00020137	0.01298	1	ZNF397
1153	piR-52808	hsa_piRNA_9263	DQ585696P	1.9012	1.36159	-0.45941	0.0047202	0.06255	1	UBXN10
454	piR-52118	hsa_piRNA_9953	DQ585006P	0.54287	0.39128	-0.45935	0.00069588	0.02342	1	LLNLF-136C3.1,LINC00905
1157	piR-49261	hsa_piRNA_12810	DQ581149P	0.90992	0.64529	-0.45784	0.004735	0.06253	1	RP11-434D2.11,RP1-37N7.1,EVPLL,TNFRSF13B
1013	piR-49287	hsa_piRNA_12784	DQ581175P	3.80208	2.69385	-0.45734	0.0035158	0.05303	1
957	piR-44913	hsa_piRNA_17158	DQ576801P	1.18989	0.85255	-0.45393	0.0031244	0.04988	1	RP13-39P12.2
354	piR-38334	hsa_piRNA_23737	DQ600268P	0.48594	0.35484	-0.45347	0.00043992	0.01899	1
1119	piR-30963	hsa_piRNA_31108	DQ570851P	15.7371	11.387	-0.45317	0.0044187	0.06033	1	MERTK,TBC1D23,CFLAR,REPS2,NNT-AS1,TTLL3,RP11-234B24.6,TTLL3,NIT2,RP11-583F2.1,LINC00707,ZNF793,IMPDH1P10,PRDX1,GALNT8,TTC5
76	piR-51377	hsa_piRNA_10694	DQ584265P	11.8773	8.71727	-0.45308	2.2391e-05	0.0045	0.34211	TDRG1
1559	piR-30999	hsa_piRNA_31072	DQ570887P	3.76231	2.73665	-0.45104	0.0087568	0.08582	1	CTC-523E23.4
984	piR-33451	hsa_piRNA_28620	DQ593339P	2.41128	1.74622	-0.45014	0.0033025	0.05128	1	CTD-2054N24.1,DNM1P46,GOLGA8VP,DNM1P47
1483	piR-41194	hsa_piRNA_20877	DQ573082P	0.33147	0.23823	-0.45007	0.0079408	0.08181	1	GOLGA2P5
329	piR-44593	hsa_piRNA_17478	DQ576481P	6.50402	4.77947	-0.4481	0.00038223	0.01775	1	FGD4
1052	piR-53712	hsa_piRNA_8359	DQ586600P	5.10782	3.77186	-0.44697	0.0038006	0.0552	1	CYP19A1,RP11-108K3.1
512	piR-45779	hsa_piRNA_16292	DQ577667P	1.01652	0.74275	-0.44648	0.00088182	0.02632	1	RP11-545A16.3
109	piR-51379	hsa_piRNA_10692	DQ584267P	18.4861	13.6364	-0.4451	4.1759e-05	0.00585	0.63804	TDRG1
1117	piR-42153	hsa_piRNA_19918	DQ574041P	3.5258	2.60663	-0.44196	0.004376	0.05986	1	CTC-523E23.4
1094	piR-58418	hsa_piRNA_3653	DQ591306P	0.91732	0.69938	-0.44161	0.0040787	0.05696	1
1304	piR-61363	hsa_piRNA_708	DQ595251P	6.59803	4.7836	-0.4378	0.0060965	0.07143	1	HIST1H2BJ
1417	piR-47568	hsa_piRNA_14503	DQ579456P	0.58996	0.43141	-0.43747	0.007279	0.07849	1	CTC-523E23.4,CTC-523E23.1
1420	piR-44914	hsa_piRNA_17157	DQ576802P	0.91206	0.66364	-0.43747	0.0072812	0.07834	1
893	piR-46553	hsa_piRNA_15518	DQ578441P	0.74134	0.54873	-0.43737	0.0028003	0.04791	1	RP11-545A16.3
1179	piR-49444	hsa_piRNA_12627	DQ581332P	1.14483	0.83542	-0.43662	0.0048393	0.06271	1
814	piR-55748	hsa_piRNA_6323	DQ588636P	3.50117	2.58313	-0.43634	0.0023633	0.04436	1
1152	piR-32297	hsa_piRNA_29774	DQ582185P	2.20728	1.60992	-0.43571	0.0047174	0.06257	1	RPH3AL,XIAP,KLHL7,MAN1C1,RP11-664D7.4,TMOD1,GRID2,C11orf63,BTBD9,DENND4C
784	piR-54241	hsa_piRNA_7830	DQ587129P	2.82329	2.08376	-0.4354	0.0021752	0.04239	1
993	piR-31199	hsa_piRNA_30872	DQ571087P	46.9689	34.6036	-0.4344	0.0033555	0.05163	1	RP11-774D14.1,STK33,RP11-501O2.5,CNTNAP2,CSMD3,AC022816.2,WNT5B,RP11-114G22.1,RP11-467P22.5,LINC00457,RAG1,GPR116,ANXA10,CRADD,LINC00382,RP11-142A5.1,KCNIP4,BTBD10,TPK1,MCHR2,AADACL2-AS1,GRIK1,RP11-348F1.3,AP000472.3,AOAH,MYHAS,TMEM45A,RP11-123O22.1,ATP1B3,MGAT4C,RP11-138E9.2,CCDC81,RP11-140I24.1,AC009120.4,GALNTL6,MAPK10,RP5-921G16.1,ATF6,RP11-266E6.3,RP11-799N11.1,DNAH14,AAMDC,COMMD10,RP11-317N…
1365	piR-33670	hsa_piRNA_28401	DQ593558P	0.73551	0.53329	-0.43352	0.0066779	0.07475	1	CTC-523E23.4
632	piR-54229	hsa_piRNA_7842	DQ587117P	16.6405	12.4844	-0.43211	0.00140457	0.03396	1	DNM1P34,DNM1P47,DNM1P47,DNM1P47,DNM1P47,DNM1P47,DNM1P47,DNM1P47,DNM1P47,DNM1P47,DNM1P47,DNM1P47,DNM1P47,DNM1P47,DNM1P47,DNM1P47,DNM1P47,DNM1P47,DNM1P33,DNM1P47,DNM1P47,DNM1P47,DNM1P47,DNM1P47,DNM1P47
1553	piR-33374	hsa_piRNA_28697	DQ593262P	2.92015	2.14663	-0.43084	0.0087153	0.08574	1	AP001065.15
51	piR-30754	hsa_piRNA_31317	DQ570642P	5.37606	4.00033	-0.43052	1.50629e-05	0.00451	0.23015
1444	piR-51659	hsa_piRNA_10412	DQ584547P	1.58854	1.15981	-0.42757	0.0075046	0.07941	1	FHL1
608	piR-48295	hsa_piRNA_13776	DQ580183P	1.37041	1.02505	-0.42667	0.00126369	0.03176	1	FAM225A,FAM225B
1631	piR-30928	hsa_piRNA_31143	DQ570816P	4.28501	3.16791	-0.42452	0.009776	0.09158	1	DNM1P47,DNM1P47,DNM1P47,DNM1P47,DNM1P47,DNM1P47
1134	piR-32810	hsa_piRNA_29261	DQ582698P	9.96623	7.40415	-0.42402	0.0045413	0.06119	1	RP11-80I3.1,GUCY1A2,CCDC150,MTUS2,MOXD1,RP11-424D14.1,IGSF11,PKP2,DNAH14,LDB2,CTD-2288O8.1,EGFR,RP11-681L8.1,RP11-91K9.1,USP47,CHL1,PARM1,RP11-528G1.2,LINC01278,RAB3GAP2,LINGO2,LINC01411,TBC1D32,FAM168A,RP11-664H17.1,CD84,NELFA,RGS22,NELFA,LINC00698,HERC2P3,MROH9,RP11-284M14.1,RP13-188A5.1,STPG2,CCNT2P1,RP11-33B1.1,CNGA3,C4orf17,DISC1FP1,FAM120B,ZC2HC1B,ASTN2,RP11-321E2.4,UBA6-AS1,PLCB1,HPSE2,RP1…
1107	piR-43672	hsa_piRNA_18399	DQ575560P	3.68047	2.74246	-0.42183	0.0042444	0.05858	1	NPAP1P6
144	piR-34527	hsa_piRNA_27544	DQ596461P	2.22796	1.66215	-0.41898	7.5445e-05	0.00801	1	TBC1D3P3,RP11-434D2.3,TBC1D3P4
1435	piR-50799	hsa_piRNA_11272	DQ583687P	1.17202	0.86289	-0.41858	0.0074218	0.07902	1	HIC1
1326	piR-35523	hsa_piRNA_26548	DQ597457P	3.88084	2.88848	-0.41569	0.0062815	0.07238	1	DNM1P47,DNM1P46,GOLGA8VP,CTD-2054N24.1
1594	piR-56240	hsa_piRNA_5831	DQ589128P	2.08368	1.56423	-0.41532	0.0092034	0.08822	1
1217	piR-43300	hsa_piRNA_18771	DQ575188P	0.81985	0.60878	-0.41469	0.0052032	0.06532	1	RP11-1223D19.1
1534	piR-47105	hsa_piRNA_14966	DQ578993P	0.27165	0.19887	-0.4124	0.0084751	0.08441	1	LINC01016
1592	piR-32279	hsa_piRNA_29792	DQ582167P	1.0249	0.77572	-0.41032	0.0091185	0.08751	1	LRRC59
716	piR-52820	hsa_piRNA_9251	DQ585708P	5.56567	4.20749	-0.41012	0.00180333	0.03848	1	PDZD2
460	piR-44545	hsa_piRNA_17526	DQ576433P	1.42015	1.05692	-0.40992	0.00070185	0.02331	1
1372	piR-40844	hsa_piRNA_21227	DQ572732P	0.29901	0.22258	-0.4097	0.0067597	0.07528	1	NCOA4,AC138517.4
789	piR-42331	hsa_piRNA_19740	DQ574219P	0.29644	0.21914	-0.40909	0.0022199	0.04299	1
752	piR-61836	hsa_piRNA_235	DQ595724P	1.7614	1.30833	-0.40767	0.00196268	0.03988	1	CYP19A1,RP11-108K3.1
1322	piR-54242	hsa_piRNA_7829	DQ587130P	2.37923	1.78817	-0.40735	0.0062389	0.07211	1	CPQ
680	piR-51347	hsa_piRNA_10724	DQ584235P	8.12618	6.04282	-0.40709	0.00160323	0.03602	1
1590	piR-50743	hsa_piRNA_11328	DQ583631P	0.59847	0.44958	-0.40496	0.0090836	0.08729	1	PIK3IP1
809	piR-40494	hsa_piRNA_21577	DQ572382P	4.21713	3.18753	-0.40483	0.0023447	0.04428	1	RP11-146N23.1,RPS6,TMEM150C,RP11-392P7.1,RP11-791G16.2
670	piR-59485	hsa_piRNA_2586	DQ592373P	1.25523	0.94206	-0.40319	0.0015772	0.03597	1
305	piR-53108	hsa_piRNA_8963	DQ585996P	1.01137	0.76055	-0.40157	0.00032051	0.01606	1	DNM1P31,DNM1P28,DNM1P32,DNM1P50,RP11-382B18.6,DNM1P30,RP11-1H8.6
1225	piR-53466	hsa_piRNA_8605	DQ586354P	1.84704	1.3775	-0.40019	0.005316	0.0663	1
1614	piR-51749	hsa_piRNA_10322	DQ584637P	0.45295	0.33924	-0.39942	0.009517	0.09009	1	RP11-545A16.3,AGAP1
739	piR-51144	hsa_piRNA_10927	DQ584032P	4.68297	3.59293	-0.39924	0.00189945	0.03927	1
945	piR-48297	hsa_piRNA_13774	DQ580185P	1.43682	1.08535	-0.39513	0.0030568	0.04942	1
1131	piR-41169	hsa_piRNA_20902	DQ573057P	0.73309	0.55746	-0.39279	0.0045163	0.06101	1
1330	piR-41729	hsa_piRNA_20342	DQ573617P	0.52469	0.39514	-0.39259	0.0063585	0.07305	1
1613	piR-53467	hsa_piRNA_8604	DQ586355P	0.66716	0.50065	-0.39196	0.009505	0.09004	1
1109	piR-38562	hsa_piRNA_23509	DQ600496P	23.1558	17.3037	-0.39172	0.0042976	0.05921	1
1350	piR-54571	hsa_piRNA_7500	DQ587459P	0.22685	0.17442	-0.38915	0.006537	0.07398	1
1634	piR-44869	hsa_piRNA_17202	DQ576757P	0.75278	0.57469	-0.38883	0.0098035	0.09167	1
890	piR-38454	hsa_piRNA_23617	DQ600388P	2.99463	2.27001	-0.38627	0.0027801	0.04773	1
1605	piR-42814	hsa_piRNA_19257	DQ574702P	2.78753	2.12748	-0.38622	0.0094012	0.0895	1	LRRC37A17P,RP11-156P1.3,LRRC37A4P,LRRC37A4P
1223	piR-59359	hsa_piRNA_2712	DQ592247P	0.79129	0.59451	-0.38615	0.0052811	0.06598	1
612	piR-32851	hsa_piRNA_29220	DQ582739P	0.8749	0.66336	-0.38486	0.00129637	0.03236	1	RP11-383M4.6,SPATA31D4,SPATA31D3,RP11-383M4.6,SPATA31D5P,SPATA31D1
1221	piR-48257	hsa_piRNA_13814	DQ580145P	5.19042	3.85289	-0.38064	0.005264	0.06587	1
13	piR-54515	hsa_piRNA_7556	DQ587403P	2.65872	2.04358	-0.37991	6.6903e-07	0.00079	0.01022
757	piR-43205	hsa_piRNA_18866	DQ575093P	4.4868	3.36702	-0.37941	0.00199673	0.0403	1
1539	piR-37715	hsa_piRNA_24356	DQ599649P	3.56825	2.64167	-0.37921	0.0085033	0.08442	1	RP11-108K3.1,CYP19A1
1006	piR-31358	hsa_piRNA_30713	DQ571246P	8.1151	6.22056	-0.37709	0.0034602	0.05255	1	LINC01015
1459	piR-49703	hsa_piRNA_12368	DQ581591P	1.63281	1.23733	-0.37701	0.0076577	0.08019	1	CDS2
178	piR-46328	hsa_piRNA_15743	DQ578216P	2.17667	1.67672	-0.37495	0.000100662	0.00864	1	SDCCAG3
1565	piR-57451	hsa_piRNA_4620	DQ590339P	2.57418	1.9668	-0.37383	0.0088172	0.08608	1	C10orf11
274	piR-46994	hsa_piRNA_15077	DQ578882P	0.65353	0.50274	-0.37376	0.00026206	0.01461	1
219	piR-41603	hsa_piRNA_20468	DQ573491P	1.82239	1.41094	-0.37124	0.000162151	0.01131	1	RP11-613M10.9,TMX2P1,TMX2,TMX2-CTNND1,SLC25A51
1558	piR-31574	hsa_piRNA_30497	DQ571462P	1.40093	1.06832	-0.36971	0.0087402	0.08571	1	SPATA8-AS1
1472	piR-34790	hsa_piRNA_27281	DQ596724P	9.26567	7.33551	-0.36835	0.0077965	0.08093	1
900	piR-48389	hsa_piRNA_13682	DQ580277P	1373.44	1054.93	-0.36826	0.0028374	0.04817	1	ZNF584,RP11-432B6.3,TRPM7,PLCXD1,PLCXD1,LGALS3,SPAG16,AC005592.2,IFT80,DCHS2,PEMT,C10orf11,EPG5,FAF1,RP11-290O12.2,RPS6KA4,CCND3
938	piR-56617	hsa_piRNA_5454	DQ589505P	2.06517	1.58456	-0.36339	0.0030039	0.04893	1
719	piR-52365	hsa_piRNA_9706	DQ585253P	0.79722	0.61814	-0.36263	0.00181944	0.03866	1
745	piR-41975	hsa_piRNA_20096	DQ573863P	2.07704	1.61187	-0.36229	0.00193514	0.03969	1	DNM1P47,DNM1P47,DNM1P47,DNM1P47,DNM1P47,DNM1P47,DNM1P47,DNM1P47,DNM1P47,DNM1P47,DNM1P47
429	piR-47535	hsa_piRNA_14536	DQ579423P	1.04611	0.81364	-0.36027	0.00062248	0.02217	1
1187	piR-32612	hsa_piRNA_29459	DQ582500P	2.18545	1.7463	-0.36018	0.0048976	0.06304	1	RP5-821D11.7
1296	piR-56340	hsa_piRNA_5731	DQ589228P	34.3329	26.3019	-0.35985	0.0060022	0.07076	1	FILIP1
1146	piR-54764	hsa_piRNA_7307	DQ587652P	41.6459	32.2478	-0.35775	0.0046448	0.06193	1	LRRC37A,CAMKMT,LIN28B,METTL16,ACSL3,STAG1,MRGPRX3,NLRP2,NOX5,ZNF833P,LINC00407,FRMD6-AS2,ZNF680,RP11-464F9.1,DTNB,LRRC37A5P,AC109829.1,LINC00174,PTPN9,ATP9B,RP11-544M22.13,CHN2,GPR176,NNT-AS1,FUCA1,IP6K2,NPLOC4,PDS5B,TET3,NR2C1,HYKK,FAM46D,RP11-115J16.1,NBPF13P,LINC01278,AOX3P,SCFD2,SLC25A12,VPS13B,ZNF709,CDC123,UTRN,ITPR2,RP11-159F24.5,RP11-114H23.1,LRBA,LHFPL3,RNF19A,PCYT1A,NCR1,SIAH1,ZYG11B,ER…
375	piR-49916	hsa_piRNA_12155	DQ581804P	2.42986	1.90185	-0.35772	0.00048491	0.01976	1	TSTD2
1469	piR-31225	hsa_piRNA_30846	DQ571113P	0.27978	0.22019	-0.35602	0.0077763	0.08088	1
948	piR-35363	hsa_piRNA_26708	DQ597297P	1.03426	0.80395	-0.35538	0.0030617	0.04935	1	RP11-386M24.9
1357	piR-50838	hsa_piRNA_11233	DQ583726P	0.54437	0.42786	-0.35538	0.0065952	0.07426	1	NUBP1
1105	piR-50715	hsa_piRNA_11356	DQ583603P	2.42248	1.89364	-0.35375	0.0042163	0.0583	1
1232	piR-31737	hsa_piRNA_30334	DQ571625P	1.13921	0.87591	-0.3512	0.0054017	0.06699	1	RP11-299H22.3
238	piR-51380	hsa_piRNA_10691	DQ584268P	8.53905	6.71701	-0.34878	0.00020224	0.01298	1
1359	piR-60165	hsa_piRNA_1906	DQ594053P	1.55061	1.21443	-0.34826	0.0066002	0.0742	1	ZSCAN25
1220	piR-34033	hsa_piRNA_28038	DQ595967P	3.25266	2.50399	-0.34766	0.0052616	0.0659	1
973	piR-31156	hsa_piRNA_30915	DQ571044P	2.0307	1.61652	-0.34759	0.0032373	0.05084	1	BSN
1176	piR-61676	hsa_piRNA_395	DQ595564P	2.18824	1.70395	-0.34714	0.0048238	0.06267	1	CNBD1,CTD-2643K12.2,SUMF1,CTD-3049M7.1,S100Z,RP11-70C1.3,HS6ST1,CTD-2643K12.3,ACKR2,SETMAR,GPC5
980	piR-51145	hsa_piRNA_10926	DQ584033P	4.24944	3.32819	-0.34605	0.003264	0.05089	1
437	piR-55384	hsa_piRNA_6687	DQ588272P	2.03887	1.60534	-0.34571	0.00064201	0.02245	1	CTC-523E23.4
491	piR-57293	hsa_piRNA_4778	DQ590181P	2.16064	1.68389	-0.34397	0.00079673	0.02479	1	LSM4
1480	piR-34556	hsa_piRNA_27515	DQ596490P	6.40686	4.86559	-0.34268	0.007921	0.08177	1
1073	piR-51227	hsa_piRNA_10844	DQ584115P	2.14954	1.68236	-0.34165	0.0039408	0.05612	1	TBC1D3P3,RP11-434D2.3,TBC1D3P4
464	piR-33454	hsa_piRNA_28617	DQ593342P	4.20896	3.33288	-0.3403	0.00071897	0.02367	1
1518	piR-40999	hsa_piRNA_21072	DQ572887P	6.17443	4.94141	-0.33975	0.0083588	0.08413	1
940	piR-44184	hsa_piRNA_17887	DQ576072P	0.48188	0.38414	-0.33662	0.0030353	0.04934	1	ATL3
1268	piR-56850	hsa_piRNA_5221	DQ589738P	1.37341	1.07698	-0.33655	0.0057367	0.06913	1
1405	piR-53012	hsa_piRNA_9059	DQ585900P	2709.11	2121.1	-0.33639	0.0071172	0.0774	1	FAM225B,FAM225A
1525	piR-59872	hsa_piRNA_2199	DQ592760P	2.7666	2.18284	-0.33496	0.0084046	0.08421	1	RP11-266O8.1,RP11-164C12.2
824	piR-46619	hsa_piRNA_15452	DQ578507P	4.54968	3.61306	-0.33493	0.0024571	0.04556	1	AC008132.13,POM121L9P,POM121L3P,POM121L1P,POM121L10P,POM121L7
1201	piR-34045	hsa_piRNA_28026	DQ595979P	0.2454	0.19221	-0.33339	0.005044	0.06417	1	RP11-146D12.2
927	piR-39972	hsa_piRNA_22099	DQ601906P	5.74146	4.5595	-0.33279	0.0029571	0.04874	1	RP11-242C24.2,RP11-410C4.1,RPL7AP8,CTD-2270N23.1,GNB1L,RP11-170M17.1,RP11-84O12.2,RP11-204K16.1,AC000089.3,SEMA6D,DOCK4,HECTD4,AC003080.4,RASSF5,POLQ,RPL7AP6,PTP4A1,RPL7AP10,LINC00669,RP11-170M17.2,RPL7AP34,RPL7AP66,RPL7AP3,AC004129.9,RPL7AP11,RP3-486D24.1,KIAA0391,RPL7AP26,TMEM150C,KB-1582A10.1,RAD51B,RP11-534L20.4,RPL7AP60,ZNF431,SMOC1,KIAA0391,OFCC1,RPL7A
1606	piR-45103	hsa_piRNA_16968	DQ576991P	3817.66	2979.83	-0.33236	0.0094036	0.08946	1	RP11-248C1.3,LINC00865
1338	piR-30334	hsa_piRNA_31737	DQ570222P	0.80994	0.64464	-0.33003	0.0063828	0.07289	1
481	piR-56004	hsa_piRNA_6067	DQ588892P	1.80166	1.42952	-0.32987	0.00075975	0.02413	1	RP11-69H14.6,LINC01193
1376	piR-33039	hsa_piRNA_29032	DQ592927P	1.65037	1.3048	-0.32741	0.006799	0.0755	1	LINC00930
1149	piR-41593	hsa_piRNA_20478	DQ573481P	0.32	0.25586	-0.32586	0.0046568	0.06192	1	GOLGA8A,GOLGA8B
215	piR-54909	hsa_piRNA_7162	DQ587797P	7.19433	5.6847	-0.324	0.000160007	0.01137	1	PRMT8
1586	piR-51439	hsa_piRNA_10632	DQ584327P	0.70605	0.56174	-0.32358	0.0090552	0.08723	1	LINC01076
1395	piR-35521	hsa_piRNA_26550	DQ597455P	1.83289	1.46241	-0.31861	0.0070409	0.07712	1	GOLGA8VP,CTD-2054N24.1,DNM1P47,DNM1P46
969	piR-37067	hsa_piRNA_25004	DQ599001P	4.58973	3.67973	-0.31844	0.0032219	0.0508	1
414	piR-51378	hsa_piRNA_10693	DQ584266P	11.5846	9.24819	-0.3153	0.00059697	0.02203	1	TDRG1
1591	piR-57475	hsa_piRNA_4596	DQ590363P	1.75413	1.42974	-0.31499	0.0091177	0.08756	1	ZMYND19
986	piR-30918	hsa_piRNA_31153	DQ570806P	1.62234	1.30472	-0.31278	0.0033365	0.0517	1	RP11-386M24.3
261	piR-41893	hsa_piRNA_20178	DQ573781P	3.12015	2.51745	-0.3109	0.00024492	0.01434	1
1362	piR-45092	hsa_piRNA_16979	DQ576980P	0.76486	0.6106	-0.31077	0.0066412	0.0745	1
1307	piR-31190	hsa_piRNA_30881	DQ571078P	0.31152	0.25049	-0.31025	0.00612	0.07154	1	BARHL2
1589	piR-46738	hsa_piRNA_15333	DQ578626P	6.73645	5.47389	-0.30279	0.0090829	0.08734	1
756	piR-31212	hsa_piRNA_30859	DQ571100P	1.6511	1.33286	-0.3021	0.00198488	0.04012	1	REPIN1,RP4-584D14.5,ZNF775
1527	piR-50402	hsa_piRNA_11669	DQ583290P	8.53664	6.73037	-0.30121	0.0084368	0.08442	1	RP11-145G20.1
1323	piR-35530	hsa_piRNA_26541	DQ597464P	10.9636	8.92475	-0.30082	0.0062389	0.07205	1	CBFA2T3
841	piR-36775	hsa_piRNA_25296	DQ598709P	0.97227	0.78579	-0.30033	0.0025436	0.04621	1
1161	piR-48368	hsa_piRNA_13703	DQ580256P	2.53338	2.05064	-0.30026	0.0047569	0.0626	1	RP11-889L3.1,RPL19
1101	piR-32403	hsa_piRNA_29668	DQ582291P	8.31227	6.71093	-0.30008	0.0041954	0.05822	1	AGAP4,AGAP10,AGAP5,AC244230.1,AGAP6,RP11-464F9.1,AC244230.1,CTGLF12P,CTGLF10P,AGAP6,RP11-109G10.1
1167	piR-30868	hsa_piRNA_31203	DQ570756P	1.55792	1.26298	-0.29933	0.004777	0.06254	1
302	piR-35302	hsa_piRNA_26769	DQ597236P	1.4699	1.19635	-0.29821	0.00031614	0.01599	1
1139	piR-47838	hsa_piRNA_14233	DQ579726P	1.01285	0.81946	-0.29729	0.0046004	0.06171	1	SMPD4P2
1413	piR-37435	hsa_piRNA_24636	DQ599369P	0.33866	0.27806	-0.29595	0.0072154	0.07802	1	C1orf94
1164	piR-44289	hsa_piRNA_17782	DQ576177P	434.035	357.586	-0.29175	0.0047633	0.06252	1
843	piR-47040	hsa_piRNA_15031	DQ578928P	1.51684	1.23193	-0.28917	0.0025557	0.04632	1	RP11-528A10.1
1505	piR-55042	hsa_piRNA_7029	DQ587930P	3.61847	2.96392	-0.28578	0.0081649	0.08289	1
1608	piR-46133	hsa_piRNA_15938	DQ578021P	1.63847	1.33789	-0.28486	0.0094248	0.08955	1	LINC01016
1055	piR-50768	hsa_piRNA_11303	DQ583656P	10.9846	8.91735	-0.28187	0.0038351	0.05554	1	RP3-468B3.2
630	piR-38239	hsa_piRNA_23832	DQ600173P	14.0389	11.5998	-0.27878	0.00139542	0.03384	1
1003	piR-34938	hsa_piRNA_27133	DQ596872P	1.08526	0.88788	-0.27816	0.0034412	0.05242	1
374	piR-34559	hsa_piRNA_27512	DQ596493P	1.93762	1.60757	-0.27454	0.00048454	0.01979	1	RP3-468B3.2
1627	piR-37068	hsa_piRNA_25003	DQ599002P	4.86326	3.99485	-0.27173	0.0096819	0.09092	1
1607	piR-31595	hsa_piRNA_30476	DQ571483P	0.40276	0.33124	-0.27067	0.0094173	0.08954	1	RP11-613M10.9,EXOSC3,TRMT10B
1068	piR-30166	hsa_piRNA_31905	DQ570054P	4.03094	3.35394	-0.26472	0.0039248	0.05615	1	KCNT1
968	piR-57649	hsa_piRNA_4422	DQ590537P	6.84809	5.68108	-0.26346	0.0032215	0.05085	1	RP13-580B18.4,AC005077.12
417	piR-43459	hsa_piRNA_18612	DQ575347P	2.01725	1.67978	-0.26159	0.00060095	0.02202	1
801	piR-58543	hsa_piRNA_3529	DQ591431P	1.90537	1.58698	-0.25998	0.0023005	0.04388	1	CTC-523E23.4
440	piR-32973	hsa_piRNA_29098	DQ582861P	1.75258	1.4723	-0.24888	0.00065513	0.02275	1	TGIF2,TGIF2-C20orf24
1177	piR-40628	hsa_piRNA_21443	DQ572516P	6.592	5.57878	-0.23385	0.0048369	0.06279	1	ZNF584,CTD-2619J13.14
620	piR-48514	hsa_piRNA_13557	DQ580402P	0.56104	0.47737	-0.2327	0.0013226	0.03259	1
916	piR-42155	hsa_piRNA_19916	DQ574043P	1.7481	1.48267	-0.22821	0.0028806	0.04805	1
1261	piR-49782	hsa_piRNA_12289	DQ581670P	1.91153	1.626	-0.22565	0.0056645	0.06863	1	PARD3
1173	piR-58542	hsa_piRNA_3528	DQ591430P	2.71997	2.33053	-0.22281	0.0048017	0.06254	1	CTC-523E23.4
958	piR-44031	hsa_piRNA_18040	DQ575919P	0.79937	0.68692	-0.22281	0.0031409	0.05009	1	RP3-468B3.2
1337	piR-52924	hsa_piRNA_9147	DQ585812P	3.06203	2.64107	-0.22043	0.0063827	0.07294	1	PRMT8
493	piR-34102	hsa_piRNA_27969	DQ596036P	5.60882	4.8037	-0.21798	0.00080372	0.02491	1
637	piR-49074	hsa_piRNA_12997	DQ580962P	1.35382	1.16536	-0.21597	0.00142325	0.03414	1	IPPK,CENPP
1336	piR-53451	hsa_piRNA_8620	DQ586339P	0.22173	0.19075	-0.21501	0.0063806	0.07297	1	GOLGA8A,GOLGA8B
828	piR-41217	hsa_piRNA_20854	DQ573105P	2.09897	1.81863	-0.20935	0.0024797	0.04576	1	RP11-299H22.3
289	piR-58716	hsa_piRNA_3355	DQ591604P	0.6543	0.56732	-0.20614	0.00028438	0.01503	1
820	piR-41442	hsa_piRNA_20629	DQ573330P	1.6655	1.43634	-0.20566	0.0024223	0.04513	1
1635	piR-49763	hsa_piRNA_12308	DQ581651P	1.1519	0.99894	-0.20162	0.0098195	0.09176	1	LINC00905
1512	piR-47320	hsa_piRNA_14751	DQ579208P	1.61687	1.4195	-0.18915	0.0082969	0.08384	1
687	piR-48526	hsa_piRNA_13545	DQ580414P	1.08311	0.95769	-0.17289	0.00163856	0.03644	1
1618	piR-44030	hsa_piRNA_18041	DQ575918P	0.50579	0.44905	-0.17184	0.0095563	0.09024	1	RP3-468B3.2
1241	piR-56085	hsa_piRNA_5986	DQ588973P	5.18805	4.66649	-0.14843	0.0055031	0.06775	1	RP11-299H22.3
1578	piR-60075	hsa_piRNA_1996	DQ593963P	0.38635	0.35078	-0.14717	0.0089971	0.08711	1	WEE2-AS1
369	piR-58545	hsa_piRNA_3526	DQ591433P	1.44776	1.30868	-0.14593	0.00046376	0.0192	1
901	piR-55637	hsa_piRNA_6434	DQ588525P	7.29475	6.71699	-0.12085	0.0028378	0.04812	1	RPL30
891	piR-31303	hsa_piRNA_30768	DQ571191P	1.47194	1.36106	-0.11054	0.0027846	0.04775	1	RP11-438J1.1,TATDN2
1244	piR-34743	hsa_piRNA_27328	DQ596677P	2.72465	2.52747	-0.10609	0.0055219	0.06782	1	CTC-559E9.12
1352	piR-39641	hsa_piRNA_22430	DQ601575P	0.92382	0.9915	0.10264	0.0065427	0.07394	1	RP11-386M24.3
1524	piR-50888	hsa_piRNA_11183	DQ583776P	1.64046	1.82056	0.15553	0.0084021	0.08424	1
1629	piR-51973	hsa_piRNA_10098	DQ584861P	0.47498	0.5339	0.17298	0.0097368	0.09133	1
1584	piR-49075	hsa_piRNA_12996	DQ580963P	2.70312	3.05602	0.17519	0.0090245	0.08705	1	FAM173A,MSLN
1425	piR-57974	hsa_piRNA_4097	DQ590862P	0.78161	0.88464	0.17542	0.0073587	0.0789	1	TRAM2
1282	piR-57333	hsa_piRNA_4738	DQ590221P	1.88074	2.13021	0.1782	0.005836	0.06955	1
1514	piR-30548	hsa_piRNA_31523	DQ570436P	0.34682	0.39282	0.18504	0.0083169	0.08393	1	FAM225A,FAM225B
1479	piR-36277	hsa_piRNA_25794	DQ598211P	0.41887	0.47187	0.18946	0.0079182	0.0818	1	RP11-545A16.3
866	piR-43439	hsa_piRNA_18632	DQ575327P	7.54795	8.71843	0.19996	0.0026771	0.04723	1
1477	piR-52258	hsa_piRNA_9813	DQ585146P	6.26748	7.31985	0.20206	0.0079031	0.08175	1
676	piR-49811	hsa_piRNA_12260	DQ581699P	0.69433	0.79964	0.20762	0.00158241	0.03577	1	LINC01016
1517	piR-43156	hsa_piRNA_18916	DQ575044P	4.46337	5.11035	0.21991	0.0083387	0.08399	1	ANKFY1,RP11-810M2.2,CYB5D2
693	piR-49311	hsa_piRNA_12760	DQ581199P	1.42495	1.65404	0.22281	0.00168396	0.03713	1
619	piR-57365	hsa_piRNA_4706	DQ590253P	1.02243	1.19401	0.23039	0.00132064	0.0326	1	CTC-523E23.4
1319	piR-43433	hsa_piRNA_18638	DQ575321P	0.5031	0.59026	0.23613	0.0062185	0.07203	1	RP11-386M24.3
1005	piR-56302	hsa_piRNA_5769	DQ589190P	1.61361	1.9092	0.24941	0.0034595	0.05259	1	AP1G1
1602	piR-49030	hsa_piRNA_13041	DQ580918P	33.1235	39.9481	0.24956	0.0093572	0.08924	1	RP1-63G5.5
1147	piR-58483	hsa_piRNA_3588	DQ591371P	0.41891	0.49576	0.25101	0.0046556	0.06202	1	NBPF6
175	piR-35067	hsa_piRNA_27004	DQ597001P	1.02738	1.22528	0.25569	9.8604e-05	0.00861	1	RP1-63G5.5
700	piR-61360	hsa_piRNA_711	DQ595248P	0.34613	0.41489	0.25648	0.00172485	0.03765	1	FAM225B,FAM225A
1183	piR-61322	hsa_piRNA_749	DQ595210P	2.761	3.3374	0.25773	0.0048437	0.06256	1	FAM225A,FAM225B
1530	piR-46915	hsa_piRNA_15156	DQ578803P	0.75966	0.90696	0.26359	0.0084409	0.08429	1
1297	piR-51520	hsa_piRNA_10551	DQ584408P	2.88893	3.51134	0.26728	0.0060588	0.07137	1	KIF9-AS1
1423	piR-58308	hsa_piRNA_3763	DQ591196P	1.1958	1.46103	0.28124	0.0073231	0.07863	1	PDE3B,ANO10,ZNF267,LUZP2,PLD1,NTN4,RP11-35N6.1,AGBL4,LRRC7,FAM160A1,UBE2E2,TSSC1,AC007392.3,ERC2,ZSWIM5,NREP-AS1,RP11-778J15.1,PSG6,RP11-32K4.1,AKAP6,RASGEF1B,SLC38A6,RP11-410D17.2,SNTG1,KCNS3,SPSB4,CTD-3138F19.1,ZUFSP,KIF6,DNAH14,RP11-689K5.3,DNM3,ARHGAP24,GRIA1,TTC3,SCN11A,STK32B,FBXL4,GRM7,NREP,LYPD6,CCDC7,GNA12,TEX11,PLCE1,SLC4A4,TPTE2P6,MRPS22,AC144449.1,RP11-384F7.2,MGAT4C,FRAS1,CNTN5,DCTN4…
1402	piR-61950	hsa_piRNA_121	DQ595838P	1.70397	2.00782	0.2849	0.0070993	0.07737	1	ZIC5
851	piR-49993	hsa_piRNA_12078	DQ581881P	1.65008	2.00871	0.28606	0.0025845	0.0464	1	CFL1P5,CFL1P4,CCDC125,SNX32,CFL1
689	piR-33356	hsa_piRNA_28715	DQ593244P	0.81882	0.99591	0.28704	0.00166016	0.03682	1	FAM225A
761	piR-38107	hsa_piRNA_23964	DQ600041P	1.63267	1.98337	0.28755	0.0020163	0.04048	1
1465	piR-38996	hsa_piRNA_23075	DQ600930P	1.98655	2.41779	0.2902	0.0077366	0.08069	1	RP11-386M24.3
1623	piR-33953	hsa_piRNA_28118	DQ593841P	1.15306	1.40365	0.29592	0.0096375	0.09073	1	ZFHX3
1228	piR-33194	hsa_piRNA_28877	DQ593082P	0.20371	0.24841	0.2977	0.0053248	0.06625	1	RP11-108K3.1,CYP19A1
794	piR-54890	hsa_piRNA_7181	DQ587778P	0.74734	0.92185	0.30171	0.0022393	0.04309	1	RP11-386M24.3
1386	piR-37505	hsa_piRNA_24566	DQ599439P	0.72934	0.88776	0.30211	0.0069446	0.07656	1	MIEF1
709	piR-42296	hsa_piRNA_19775	DQ574184P	1.01518	1.24812	0.3028	0.00176415	0.03802	1	TBC1D2B
1499	piR-53658	hsa_piRNA_8413	DQ586546P	1.87687	2.3293	0.30448	0.008064	0.08219	1	LINC01206
576	piR-54891	hsa_piRNA_7180	DQ587779P	0.84574	1.04754	0.30493	0.00111999	0.02971	1
864	piR-58029	hsa_piRNA_4042	DQ590917P	2.96794	3.73062	0.30581	0.0026634	0.0471	1
691	piR-34882	hsa_piRNA_27189	DQ596816P	0.39982	0.48685	0.30627	0.00167778	0.0371	1
1265	piR-50129	hsa_piRNA_11942	DQ583017P	5.29784	6.49875	0.30923	0.005699	0.06883	1	LINC01194,CCDC36,ARHGEF3,ALDH3A2,LY86-AS1,LRRTM4,RP11-666E17.1,GSTO1,RP11-384F7.1,UGGT2,SLC7A11-AS1,IL12A-AS1,RP11-96O20.4,RP11-769N22.1,ZNF280D,CTC-432M15.3,FSTL4,ABCC1,ANK2,RP11-164N3.2,IL21-AS1,PRDM5,AGBL4,UBE2K,HTR7,SPESP1,ELK2BP,MARCH1,FPGT-TNNI3K,PLEKHA5,TNNI3K,LRRC37A6P,PPHLN1,RMDN2,RP11-101O21.1,AC096669.2,RP11-308N19.1,AC002451.3,CCDC13,PES1,RP11-179A16.1,AC007563.5,FAM189A1,PILRA,RP11-3…
1237	piR-49952	hsa_piRNA_12119	DQ581840P	1.15903	1.43047	0.31117	0.0054778	0.06766	1	RP3-468B3.2
731	piR-60120	hsa_piRNA_1951	DQ594008P	0.75613	0.93829	0.31242	0.00185754	0.03883	1	TMEM99
1301	piR-47508	hsa_piRNA_14563	DQ579396P	0.52019	0.63426	0.31364	0.0060829	0.07144	1	RP11-98J23.2,GUSBP3,RP11-1415C14.3
1186	piR-31449	hsa_piRNA_30622	DQ571337P	1.54563	1.95982	0.31796	0.0048962	0.06308	1	SH3RF3
211	piR-59325	hsa_piRNA_2746	DQ592213P	6.62221	8.28294	0.3183	0.000158753	0.0115	1	IFT140,TMEM204
1439	piR-32845	hsa_piRNA_29226	DQ582733P	0.55884	0.70505	0.32143	0.0074609	0.07922	1	RP11-299H22.3
326	piR-38230	hsa_piRNA_23841	DQ600164P	1.62112	2.01849	0.3242	0.00037927	0.01778	1
322	piR-59946	hsa_piRNA_2125	DQ592834P	0.75059	0.9421	0.32581	0.00035897	0.01703	1	CTC-523E23.4
1544	piR-54847	hsa_piRNA_7224	DQ587735P	0.50834	0.6372	0.32658	0.0085777	0.08488	1	RP3-468B3.2,LINC01016
615	piR-56648	hsa_piRNA_5423	DQ589536P	0.36097	0.45474	0.33058	0.00130063	0.03231	1
733	piR-55120	hsa_piRNA_6951	DQ588008P	0.14553	0.18097	0.33413	0.00187543	0.03909	1	LINC01016,RP3-468B3.2
1022	piR-60078	hsa_piRNA_1993	DQ593966P	0.32532	0.4108	0.33595	0.0035437	0.05298	1	LINC00905
1205	piR-43474	hsa_piRNA_18597	DQ575362P	0.26229	0.32544	0.3388	0.0050802	0.06442	1
1180	piR-39779	hsa_piRNA_22292	DQ601713P	0.41423	0.52708	0.34239	0.0048414	0.06269	1	CYP19A1
598	piR-47652	hsa_piRNA_14419	DQ579540P	0.18669	0.23476	0.34383	0.00123945	0.03167	1	SRRT
649	piR-51702	hsa_piRNA_10369	DQ584590P	0.36304	0.45757	0.35047	0.00148006	0.03484	1
947	piR-45084	hsa_piRNA_16987	DQ576972P	0.21537	0.27132	0.35261	0.0030598	0.04937	1	FAM225A,FAM225B
1315	piR-52839	hsa_piRNA_9232	DQ585727P	0.47695	0.61194	0.35355	0.0062037	0.07208	1
629	piR-34073	hsa_piRNA_27998	DQ596007P	2.23376	2.86533	0.35374	0.00136366	0.03312	1
373	piR-55389	hsa_piRNA_6682	DQ588277P	0.14451	0.18412	0.35655	0.00048234	0.01976	1
943	piR-40473	hsa_piRNA_21598	DQ572361P	0.14858	0.19024	0.35674	0.0030415	0.04928	1	NCR3LG1,SCGB2B2
1104	piR-49115	hsa_piRNA_12956	DQ581003P	2.25133	2.86203	0.35833	0.0042049	0.05819	1	CHST1
1188	piR-41792	hsa_piRNA_20279	DQ573680P	1.228	1.5356	0.35833	0.004898	0.06299	1
1185	piR-36152	hsa_piRNA_25919	DQ598086P	0.14382	0.1842	0.36045	0.0048811	0.06294	1
1566	piR-46055	hsa_piRNA_16016	DQ577943P	0.27723	0.35138	0.36206	0.0088363	0.08621	1
1335	piR-51116	hsa_piRNA_10955	DQ584004P	1.49181	1.89485	0.36278	0.0063768	0.07298	1	LINC01016
453	piR-56139	hsa_piRNA_5932	DQ589027P	0.18879	0.24266	0.36539	0.00069558	0.02346	1	LINC01016,RP3-468B3.2
1317	piR-53889	hsa_piRNA_8182	DQ586777P	0.19695	0.25095	0.3663	0.006216	0.07211	1	SNAP29
775	piR-56535	hsa_piRNA_5536	DQ589423P	0.37128	0.4765	0.36711	0.0021171	0.04174	1	NDUFA13
1098	piR-52439	hsa_piRNA_9632	DQ585327P	0.93444	1.19566	0.36753	0.0041389	0.05759	1
1379	piR-47986	hsa_piRNA_14085	DQ579874P	0.55086	0.69469	0.36782	0.0068581	0.07599	1	RP11-299H22.3
342	piR-56455	hsa_piRNA_5616	DQ589343P	0.90667	1.1656	0.368	0.00040426	0.01806	1	RP11-141M1.3
1449	piR-46000	hsa_piRNA_16071	DQ577888P	0.96193	1.23427	0.37014	0.0075373	0.07948	1	LINC01016
249	piR-46869	hsa_piRNA_15202	DQ578757P	0.70761	0.90997	0.37347	0.00022168	0.0136	1	NPAP1P6
1007	piR-44977	hsa_piRNA_17094	DQ576865P	0.24841	0.31315	0.37507	0.0034768	0.05275	1	RP11-753D20.1
192	piR-38227	hsa_piRNA_23844	DQ600161P	0.91658	1.192	0.37989	0.000121466	0.00967	1	CTC-523E23.4
1110	piR-45148	hsa_piRNA_16923	DQ577036P	5.67725	7.39226	0.38143	0.0043025	0.05922	1	SPATA8-AS1
1302	piR-50804	hsa_piRNA_11267	DQ583692P	0.84096	1.13742	0.3852	0.0060951	0.07153	1	GOLGA8A,GOLGA8K,RP11-1000B6.8,GOLGA8Q,GOLGA2P4,GOLGA2P6,GOLGA8VP,GOLGA8H,GOLGA8T,GOLGA2P5,GOLGA8N,MTPAP,GOLGA8B,GOLGA8J,GOLGA8UP,DNM1P47,GOLGA8R,GOLGA8M,GOLGA8I,GOLGA8O
1258	piR-57373	hsa_piRNA_4698	DQ590261P	0.45448	0.58408	0.38531	0.0056384	0.06848	1
1545	piR-42507	hsa_piRNA_19564	DQ574395P	0.61046	0.78532	0.38876	0.0085985	0.08503	1	HELZ2
902	piR-35428	hsa_piRNA_26643	DQ597362P	2.1645	2.78962	0.38892	0.0028406	0.04812	1	EIF2B5,PSMD2
173	piR-59383	hsa_piRNA_2688	DQ592271P	0.65986	0.86502	0.38978	9.7414e-05	0.0086	1
444	piR-59103	hsa_piRNA_2968	DQ591991P	0.27962	0.36644	0.39219	0.00066089	0.02274	1
1367	piR-49637	hsa_piRNA_12434	DQ581525P	4.51398	5.74361	0.39374	0.0066845	0.07471	1	BRF1
665	piR-53771	hsa_piRNA_8300	DQ586659P	0.33558	0.44121	0.3949	0.00154379	0.03547	1	TRAPPC10
1448	piR-52627	hsa_piRNA_9444	DQ585515P	0.91072	1.21455	0.39529	0.0075357	0.07952	1
976	piR-40603	hsa_piRNA_21468	DQ572491P	0.59188	0.77293	0.39984	0.0032585	0.05101	1
458	piR-49552	hsa_piRNA_12519	DQ581440P	1.37645	1.81423	0.4008	0.00070039	0.02337	1
1412	piR-32719	hsa_piRNA_29352	DQ582607P	0.21736	0.28884	0.40391	0.007202	0.07793	1	DNM1P47,DNM1P47,DNM1P47,DNM1P47,DNM1P47,DNM1P47,DNM1P47,DNM1P47,DNM1P47,DNM1P47,DNM1P47,DNM1P47,DNM1P47,DNM1P47,DNM1P47,DNM1P47,DNM1P47,DNM1P46,DNM1P47,DNM1P47,DNM1P47,DNM1P47,DNM1P47,DNM1P49,DNM1P47,DNM1P47,DNM1P47,DNM1P47,DNM1P47,DNM1P47,DNM1P47,DNM1P47,DNM1P47,DNM1P47,DNM1P47,DNM1P47,DNM1P47,DNM1P47,DNM1P47,DNM1P47,DNM1P47,DNM1P47,DNM1P47,DNM1P47,DNM1P47,DNM1P47,DNM1P47,DNM1P47,DNM1P47,DNM1P47…
762	piR-36343	hsa_piRNA_25728	DQ598277P	0.30525	0.40261	0.40398	0.0020168	0.04044	1	ELFN2,RP1-63G5.5
803	piR-49268	hsa_piRNA_12803	DQ581156P	0.68225	0.89698	0.40441	0.0023183	0.04411	1	SPATA8-AS1
1475	piR-39962	hsa_piRNA_22109	DQ601896P	0.89821	1.16593	0.40511	0.0078442	0.08126	1
1216	piR-36795	hsa_piRNA_25276	DQ598729P	1.01957	1.36817	0.40732	0.0051824	0.06512	1	RP11-182J1.14,GOLGA2P3Y,GOLGA2P2Y
1047	piR-61827	hsa_piRNA_244	DQ595715P	1.08092	1.42399	0.41016	0.003741	0.05459	1	RP3-468B3.2
977	piR-32228	hsa_piRNA_29843	DQ582116P	0.20631	0.27686	0.41089	0.0032613	0.051	1	DNM1P47,DNM1P47,DNM1P47,DNM1P47,DNM1P47,DNM1P47,DNM1P47,DNM1P47,DNM1P47,DNM1P47,DNM1P47,DNM1P47,DNM1P47,DNM1P47,DNM1P47,DNM1P46,DNM1P47,DNM1P47,DNM1P47,DNM1P47,DNM1P47,DNM1P47,DNM1P47,DNM1P47,DNM1P47,DNM1P47,DNM1P47,DNM1P47,DNM1P47,DNM1P47,DNM1P47,DNM1P47,DNM1P47,DNM1P47,DNM1P47,DNM1P47,DNM1P47,DNM1P47,DNM1P47,DNM1P47,DNM1P47,DNM1P47
1010	piR-46576	hsa_piRNA_15495	DQ578464P	2.74715	3.48695	0.41286	0.0035	0.05295	1	FAM225A,FAM225B
965	piR-57966	hsa_piRNA_4105	DQ590854P	1.6617	2.14592	0.41309	0.0032006	0.05068	1	FAM225B,FAM225A
1267	piR-59018	hsa_piRNA_3053	DQ591906P	0.71407	0.93739	0.41516	0.0057187	0.06896	1
1476	piR-33511	hsa_piRNA_28560	DQ593399P	1.00196	1.33787	0.4167	0.0078573	0.08134	1
1129	piR-60464	hsa_piRNA_1607	DQ594352P	0.84285	1.12238	0.42075	0.0045016	0.06092	1	USP6
465	piR-42339	hsa_piRNA_19732	DQ574227P	0.37001	0.49472	0.42137	0.00071961	0.02364	1
723	piR-48338	hsa_piRNA_13732	DQ580226P	0.73242	0.97528	0.42247	0.00182447	0.03856	1	LINC01016
472	piR-42082	hsa_piRNA_19989	DQ573970P	1.04907	1.40372	0.42776	0.00073951	0.02394	1
1291	piR-39439	hsa_piRNA_22632	DQ601373P	2.70793	3.72124	0.42996	0.0059642	0.07059	1	ANKRD18A,ANKRD18A,RP11-392E22.11,RP11-146D12.2,FAM95B1
1490	piR-47507	hsa_piRNA_14564	DQ579395P	0.23844	0.31685	0.43832	0.0080004	0.08204	1
1612	piR-36288	hsa_piRNA_25783	DQ598222P	3.43449	4.55195	0.44104	0.0094805	0.08986	1	FAM225B,FAM225A
448	piR-53093	hsa_piRNA_8978	DQ585981P	0.28559	0.38525	0.44451	0.00067841	0.02314	1	NBPF12,NBPF11
1166	piR-42801	hsa_piRNA_19270	DQ574689P	0.39803	0.52857	0.4489	0.0047758	0.06258	1	USP6
1456	piR-33803	hsa_piRNA_28268	DQ593691P	0.13987	0.18819	0.45101	0.0076369	0.08014	1	RP11-1O10.1,RP11-299H22.3
1334	piR-35462	hsa_piRNA_26609	DQ597396P	25.2046	34.0653	0.4514	0.0063642	0.07289	1
621	piR-36372	hsa_piRNA_25699	DQ598306P	17.5073	23.9312	0.45306	0.00132417	0.03258	1	MUC2
275	piR-60483	hsa_piRNA_1588	DQ594371P	0.81101	1.11558	0.46024	0.00026235	0.01458	1
1428	piR-44195	hsa_piRNA_17876	DQ576083P	0.5265	0.72649	0.46691	0.0074008	0.07919	1
1077	piR-58567	hsa_piRNA_3504	DQ591455P	2.36683	3.22904	0.46695	0.0039612	0.0562	1
524	piR-59046	hsa_piRNA_3025	DQ591934P	0.54675	0.75674	0.47118	0.000922	0.02688	1	H6PD
1219	piR-30438	hsa_piRNA_31633	DQ570326P	333.843	461.132	0.4726	0.0052209	0.06544	1
1474	piR-32896	hsa_piRNA_29175	DQ582784P	0.28981	0.40221	0.4736	0.0078434	0.0813	1
1277	piR-32608	hsa_piRNA_29463	DQ582496P	230.823	318.345	0.47391	0.0057817	0.06918	1	AC004448.5
748	piR-41077	hsa_piRNA_20994	DQ572965P	0.3845	0.53961	0.47701	0.00194165	0.03966	1	DCTN4
1222	piR-36437	hsa_piRNA_25634	DQ598371P	5.55988	7.4907	0.47801	0.0052758	0.06596	1	AP000253.1
951	piR-59945	hsa_piRNA_2126	DQ592833P	0.3486	0.48715	0.47941	0.0030831	0.04953	1	CTC-523E23.4
1471	piR-46895	hsa_piRNA_15176	DQ578783P	266.13	367.4	0.48059	0.0077803	0.08081	1	AC004448.5
1610	piR-42393	hsa_piRNA_19678	DQ574281P	0.20818	0.2799	0.48215	0.009438	0.08957	1	FAM225B,FAM225A
1133	piR-40831	hsa_piRNA_21240	DQ572719P	0.67025	0.91176	0.48349	0.0045352	0.06116	1	LINC00837
1165	piR-59506	hsa_piRNA_2565	DQ592394P	0.35919	0.50017	0.48362	0.0047643	0.06248	1	C3orf20
720	piR-57334	hsa_piRNA_4737	DQ590222P	0.76826	1.0663	0.48385	0.00182016	0.03863	1
1489	piR-34668	hsa_piRNA_27403	DQ596602P	8.51287	12.0012	0.48479	0.0079835	0.08192	1	KIAA0907,SNORA80E
1520	piR-33104	hsa_piRNA_28967	DQ592992P	0.18949	0.25255	0.48638	0.0083755	0.08419	1	PRMT8
452	piR-38757	hsa_piRNA_23314	DQ600691P	0.95741	1.30958	0.48666	0.00068469	0.02314	1	KCTD2
1461	piR-52694	hsa_piRNA_9377	DQ585582P	0.31369	0.43498	0.48925	0.0076761	0.08028	1	CTC-523E23.6
489	piR-38226	hsa_piRNA_23845	DQ600160P	0.89105	1.25495	0.49378	0.00078017	0.02438	1	CTC-523E23.4
1287	piR-31733	hsa_piRNA_30338	DQ571621P	0.12458	0.17351	0.49387	0.0058989	0.07003	1
1598	piR-53477	hsa_piRNA_8594	DQ586365P	0.19693	0.27863	0.49453	0.009296	0.08888	1	CD163L1
829	piR-56350	hsa_piRNA_5721	DQ589238P	0.40171	0.56213	0.49722	0.0024798	0.0457	1	RP11-723O4.2
624	piR-36204	hsa_piRNA_25867	DQ598138P	1.45923	2.04811	0.50329	0.00135691	0.03322	1
1552	piR-56204	hsa_piRNA_5867	DQ589092P	0.284	0.39397	0.50351	0.0086621	0.08528	1
100	piR-61169	hsa_piRNA_902	DQ595057P	2.07932	2.96125	0.50548	3.8866e-05	0.00594	0.59383	LINC01002,LINC01001,FAM157C,RP11-384K6.6,RP11-34P13.14,RP11-356C4.5,RP11-304M2.3,RP11-304M2.3,FAM157C,LINC01001,AC138035.2,RP4-669L17.10,RP11-504P24.8,RP11-356C4.5
1503	piR-42668	hsa_piRNA_19403	DQ574556P	0.3476	0.46839	0.50571	0.0081419	0.08277	1	RP1-63G5.5
1351	piR-50913	hsa_piRNA_11158	DQ583801P	2.3036	3.19605	0.50584	0.0065401	0.07396	1
1015	piR-60059	hsa_piRNA_2012	DQ593947P	0.24579	0.34313	0.50693	0.0035221	0.05302	1
1218	piR-33686	hsa_piRNA_28385	DQ593574P	1.38497	1.94457	0.50774	0.0052189	0.06547	1	TSR1,SNORD91,SNORD91A
486	piR-36820	hsa_piRNA_25251	DQ598754P	0.36929	0.52465	0.5101	0.00077794	0.02446	1	RP11-146D12.2
650	piR-50046	hsa_piRNA_12025	DQ582934P	0.41922	0.57455	0.51023	0.00148367	0.03488	1	RGPD2,RGPD3,RGPD4,RGPD1,RGPD6,RGPD8,RGPD5
1446	piR-44945	hsa_piRNA_17126	DQ576833P	0.32543	0.46101	0.51092	0.0075175	0.07943	1
1421	piR-37438	hsa_piRNA_24633	DQ599372P	1.35177	1.94281	0.51316	0.0073001	0.07849	1	GOLGA2P11
1390	piR-46852	hsa_piRNA_15219	DQ578740P	0.15275	0.21418	0.51503	0.0069635	0.07654	1	JAZF1
939	piR-53390	hsa_piRNA_8681	DQ586278P	0.55423	0.7937	0.51534	0.0030243	0.04921	1	RP3-468B3.2
873	piR-33647	hsa_piRNA_28424	DQ593535P	0.35535	0.5044	0.51562	0.0026979	0.04722	1	RP11-114H24.2,Metazoa_SRP,GOLGA6A,GOLGA6D,GOLGA6B,Metazoa_SRP,RP11-114H24.7,RN7SL214P,GOLGA6D,RP11-24M17.5,Metazoa_SRP,GOLGA8VP,DNM1P47,GOLGA6C,RN7SL319P,Metazoa_SRP,RP11-299H22.3,RN7SL209P,Metazoa_SRP
532	piR-45187	hsa_piRNA_16884	DQ577075P	3.72187	5.28434	0.51666	0.00095896	0.02754	1	CTC-523E23.6
416	piR-36366	hsa_piRNA_25705	DQ598300P	126.03	182.466	0.517	0.00060075	0.02206	1
1014	piR-55718	hsa_piRNA_6353	DQ588606P	0.37175	0.5118	0.51955	0.0035187	0.05302	1
854	piR-40326	hsa_piRNA_21745	DQ572214P	0.1768	0.25516	0.52042	0.0026158	0.0468	1
1034	piR-36703	hsa_piRNA_25368	DQ598637P	0.30053	0.41881	0.52457	0.0036401	0.05379	1
1433	piR-34276	hsa_piRNA_27795	DQ596210P	0.29443	0.3984	0.52474	0.0074217	0.07913	1	RP11-22B23.2
385	piR-42277	hsa_piRNA_19794	DQ574165P	0.15288	0.21868	0.52527	0.00052323	0.02076	1	MIF-AS1
776	piR-51037	hsa_piRNA_11034	DQ583925P	0.53547	0.77559	0.52591	0.0021406	0.04215	1	RP11-466P24.2,RAP1B,SV2C
929	piR-58730	hsa_piRNA_3341	DQ591618P	0.94061	1.34145	0.52699	0.002965	0.04876	1
1311	piR-44308	hsa_piRNA_17763	DQ576196P	0.15048	0.21422	0.52741	0.0061553	0.07174	1	RP3-468B3.2
1547	piR-48505	hsa_piRNA_13566	DQ580393P	0.14992	0.211	0.5277	0.0086007	0.08495	1
1208	piR-32854	hsa_piRNA_29217	DQ582742P	4.91814	6.7177	0.52875	0.0051032	0.06455	1
1044	piR-44563	hsa_piRNA_17508	DQ576451P	0.12416	0.17656	0.52961	0.0037197	0.05444	1
1048	piR-58066	hsa_piRNA_4005	DQ590954P	0.19007	0.26046	0.53078	0.0037614	0.05484	1	ARL17B,ARL17A
1192	piR-57057	hsa_piRNA_5014	DQ589945P	2.5173	3.65544	0.53192	0.0049787	0.06382	1	FAM95B1,RP11-146D12.2
1555	piR-55151	hsa_piRNA_6920	DQ588039P	73.1351	114.234	0.53307	0.0087191	0.08567	1	SNORD54,RPS20
777	piR-53887	hsa_piRNA_8184	DQ586775P	0.44467	0.65607	0.53346	0.0021434	0.04215	1	GAL3ST2
741	piR-57156	hsa_piRNA_4915	DQ590044P	0.25687	0.37885	0.53403	0.00191842	0.03956	1	CTC-523E23.4
1344	piR-54055	hsa_piRNA_8016	DQ586943P	0.491	0.70293	0.53749	0.0065014	0.07391	1	SPATA8-AS1
1199	piR-53092	hsa_piRNA_8979	DQ585980P	0.20716	0.2847	0.53778	0.0050393	0.06422	1	PLEKHB2
1060	piR-43398	hsa_piRNA_18673	DQ575286P	0.48792	0.69176	0.53795	0.0038769	0.05588	1	RP11-753D20.1
1114	piR-49997	hsa_piRNA_12074	DQ581885P	1.15104	1.74267	0.53807	0.0043605	0.05981	1	ISY1,ISY1-RAB43
1026	piR-31361	hsa_piRNA_30710	DQ571249P	0.38928	0.54003	0.5413	0.0035647	0.05308	1	TDRG1
1576	piR-34156	hsa_piRNA_27915	DQ596090P	0.27972	0.41067	0.54176	0.0089809	0.08707	1
1595	piR-45368	hsa_piRNA_16703	DQ577256P	0.71132	0.97534	0.54211	0.0092193	0.08831	1	RP11-299H22.3
1619	piR-38145	hsa_piRNA_23926	DQ600079P	0.94994	1.41385	0.54396	0.0095614	0.09023	1
746	piR-47730	hsa_piRNA_14341	DQ579618P	0.18428	0.25928	0.54435	0.00193993	0.03973	1
1645	piR-32553	hsa_piRNA_29518	DQ582441P	1.0416	1.48759	0.54443	0.0099392	0.09232	1
1036	piR-36559	hsa_piRNA_25512	DQ598493P	1.9111	2.70059	0.5445	0.0036605	0.05399	1	CICP6,CICP16,AC138035.1,RP11-261C10.8,LINC00266-2P,AC092299.6,CICP2,RP11-261C10.2,CICP10,LINC00266-3,CICP1,RP5-857K21.4,LINC00266-1,FAM157C,CICP23,RP11-291L22.4,RP4-669L17.10,CICP18,CICP4,CICP27,RP11-304M2.6,RP13-580B18.2,CICP5,AC138035.3,CICP19,AC093642.5,LINC00266-4P,CICP3,CICP24,RP11-356C4.6,RP11-34P13.7,CICP7
728	piR-33716	hsa_piRNA_28355	DQ593604P	0.8847	1.26183	0.54621	0.0018445	0.03871	1	GOLGA2P11
1455	piR-33014	hsa_piRNA_29057	DQ582902P	0.28805	0.40332	0.54747	0.0076023	0.07983	1
447	piR-51582	hsa_piRNA_10489	DQ584470P	1.33318	1.93604	0.55198	0.00067823	0.02318	1
1533	piR-53125	hsa_piRNA_8946	DQ586013P	16.9297	24.5372	0.55349	0.0084649	0.08437	1
730	piR-49914	hsa_piRNA_12157	DQ581802P	0.26945	0.39242	0.55927	0.0018564	0.03885	1
847	piR-35463	hsa_piRNA_26608	DQ597397P	32.0781	46.5943	0.56063	0.0025642	0.04626	1
333	piR-56446	hsa_piRNA_5625	DQ589334P	2.93847	4.30538	0.56174	0.00039601	0.01817	1
1200	piR-58047	hsa_piRNA_4024	DQ590935P	1.02039	1.47432	0.56302	0.0050436	0.06422	1	NBPF1,CH17-3B23.1,NBPF10,NBPF25P,NBPF11,NBPF10,NOTCH2NL,NBPF14,NOTCH2NL,NBPF12,NBPF9,NBPF13P,NBPF9
622	piR-57699	hsa_piRNA_4372	DQ590587P	0.2859	0.4223	0.56433	0.00133553	0.03281	1
1486	piR-46293	hsa_piRNA_15778	DQ578181P	0.20976	0.31155	0.56449	0.0079586	0.08183	1	RP11-248C1.3,LINC00865
297	piR-53258	hsa_piRNA_8813	DQ586146P	0.27175	0.40416	0.56511	0.0003037	0.01562	1
1600	piR-59038	hsa_piRNA_3033	DQ591926P	0.74985	1.0522	0.56609	0.009321	0.08901	1	HSPA8
611	piR-50711	hsa_piRNA_11360	DQ583599P	0.40655	0.60408	0.56626	0.00129514	0.03239	1
158	piR-44257	hsa_piRNA_17814	DQ576145P	0.62297	0.91805	0.57017	7.9954e-05	0.00773	1	GOLGA8VP,RN7SL209P,DNM1P47
65	piR-57069	hsa_piRNA_5002	DQ589957P	1.97168	2.90105	0.57052	1.95835e-05	0.0046	0.29922	RP11-392E22.11,ANKRD18A,ANKRD18A,CYP4F26P
1573	piR-31693	hsa_piRNA_30378	DQ571581P	0.31449	0.45244	0.5708	0.0089355	0.08679	1
648	piR-33687	hsa_piRNA_28384	DQ593575P	1.20816	1.78084	0.57161	0.00147952	0.03489	1
1568	piR-45593	hsa_piRNA_16478	DQ577481P	0.27823	0.42555	0.57995	0.0088772	0.0865	1	CTC-559E9.12
1373	piR-57259	hsa_piRNA_4812	DQ590147P	0.18689	0.28777	0.58614	0.0067604	0.07523	1	B3GNT9
673	piR-59902	hsa_piRNA_2169	DQ592790P	0.16901	0.25668	0.58706	0.00157952	0.03586	1	STKLD1
921	piR-54317	hsa_piRNA_7754	DQ587205P	1.1484	1.6861	0.59006	0.002905	0.04819	1	PDE4D,CTD-2553L13.9
1314	piR-58261	hsa_piRNA_3810	DQ591149P	0.39178	0.5508	0.59017	0.0061805	0.07187	1
1024	piR-36041	hsa_piRNA_26030	DQ597975P	17.7188	25.6219	0.59252	0.0035618	0.05315	1
1414	piR-31882	hsa_piRNA_30189	DQ571770P	0.21804	0.32244	0.59315	0.0072554	0.0784	1
367	piR-33867	hsa_piRNA_28204	DQ593755P	2.39153	3.59594	0.59511	0.000463	0.01928	1
1516	piR-54947	hsa_piRNA_7124	DQ587835P	0.45156	0.64903	0.59872	0.0083366	0.08402	1	ZSCAN5A,RP11-35J10.5,RP11-494M8.4,AC006116.17
1633	piR-57794	hsa_piRNA_4277	DQ590682P	0.512	0.78725	0.59889	0.009802	0.09171	1	RP11-299H22.3,GOLGA2
954	piR-31888	hsa_piRNA_30183	DQ571776P	0.261	0.39819	0.60031	0.0031033	0.0497	1	TBC1D3,TBC1D3,CH17-129M10.1,TBC1D3,TBC1D3C,TBC1D3F,TBC1D3H,TBC1D3H,TBC1D3H,TBC1D3P1,CTB-91J4.1,TBC1D3H,TBC1D3P3,TBC1D3P4,TBC1D3P2,TBC1D3P1-DHX40P1,TBC1D3B,TBC1D3B,TBC1D3F,TBC1D3
384	piR-51850	hsa_piRNA_10221	DQ584738P	1.05787	1.61291	0.60363	0.00052018	0.0207	1
1091	piR-32278	hsa_piRNA_29793	DQ582166P	1.20007	1.71165	0.60604	0.0040577	0.05683	1	LINC00905
1383	piR-49924	hsa_piRNA_12147	DQ581812P	0.15617	0.23259	0.60664	0.0069247	0.0765	1
206	piR-56315	hsa_piRNA_5756	DQ589203P	0.54854	0.83181	0.60985	0.000141436	0.01049	1	RP11-248C1.3,LINC00865,MARK2P9
324	piR-35138	hsa_piRNA_26933	DQ597072P	0.29462	0.45045	0.61127	0.00036267	0.0171	1	LINC01016
1388	piR-36026	hsa_piRNA_26045	DQ597960P	2.15966	3.26678	0.61381	0.0069595	0.07661	1
1051	piR-60895	hsa_piRNA_1176	DQ594783P	0.26857	0.40005	0.615	0.0037956	0.05518	1	FAM225A,FAM225B
1498	piR-35468	hsa_piRNA_26603	DQ597402P	53.5483	79.9886	0.61697	0.0080624	0.08223	1
946	piR-45595	hsa_piRNA_16476	DQ577483P	0.50069	0.74665	0.61897	0.0030572	0.04938	1	RP13-580B18.4,RP13-580B18.4,RP13-580B18.4,AC079355.1,RP13-580B18.4,RP13-580B18.4,RP13-580B18.4,RP13-580B18.4,RP13-580B18.4
1557	piR-31947	hsa_piRNA_30124	DQ571835P	0.11163	0.16514	0.61917	0.0087398	0.08576	1
1466	piR-51814	hsa_piRNA_10257	DQ584702P	0.14486	0.21036	0.6197	0.0077633	0.08091	1	LINC00905
1227	piR-42085	hsa_piRNA_19986	DQ573973P	0.22798	0.33862	0.62051	0.0053246	0.0663	1
583	piR-42394	hsa_piRNA_19677	DQ574282P	0.23319	0.34908	0.62095	0.00116467	0.03052	1	FAM225B,FAM225A
618	piR-32039	hsa_piRNA_30032	DQ581927P	0.15383	0.23635	0.62282	0.0013174	0.03257	1
961	piR-55213	hsa_piRNA_6858	DQ588101P	0.56464	0.85187	0.62351	0.0031558	0.05017	1	SCARNA6,ATG16L1
1597	piR-52188	hsa_piRNA_9883	DQ585076P	0.56185	0.84871	0.62474	0.0092769	0.08876	1	ACOX3
661	piR-33685	hsa_piRNA_28386	DQ593573P	0.87851	1.34868	0.62705	0.0015238	0.03522	1
1081	piR-45835	hsa_piRNA_16236	DQ577723P	0.22492	0.34594	0.62856	0.0039819	0.05628	1	CTC-523E23.5,CTC-523E23.11
1509	piR-36040	hsa_piRNA_26031	DQ597974P	11.2586	16.7268	0.63114	0.008258	0.08361	1
1079	piR-40393	hsa_piRNA_21678	DQ572281P	0.32269	0.48474	0.63313	0.0039796	0.05635	1	RNF103-CHMP3
1410	piR-61916	hsa_piRNA_155	DQ595804P	0.58498	0.84436	0.63339	0.0071958	0.07797	1	RP3-468B3.2,LINC01016
1378	piR-35237	hsa_piRNA_26834	DQ597171P	0.4092	0.63639	0.63594	0.006842	0.07586	1
251	piR-30522	hsa_piRNA_31549	DQ570410P	5.54352	8.59107	0.63606	0.00022452	0.01367	1	RP11-45M22.3,RP11-944L7.4,CDR2L,ZKSCAN7,MPRIP,RP11-944L7.5
1102	piR-36265	hsa_piRNA_25806	DQ598199P	0.78335	1.19641	0.63681	0.0041977	0.0582	1
646	piR-59200	hsa_piRNA_2871	DQ592088P	3.71775	5.69487	0.63747	0.0014605	0.03454	1
1409	piR-42481	hsa_piRNA_19590	DQ574369P	1.60738	2.54309	0.63917	0.0071358	0.07738	1	RP11-299H22.3
12	piR-36069	hsa_piRNA_26002	DQ598003P	1.71401	2.66967	0.64169	6.4639e-07	0.00082	0.00988
1574	piR-44032	hsa_piRNA_18039	DQ575920P	0.20183	0.29125	0.6447	0.0089448	0.08683	1
1050	piR-54657	hsa_piRNA_7414	DQ587545P	0.20624	0.30137	0.64484	0.0037835	0.05506	1	GOLGA8VP,DNM1P47
1320	piR-48776	hsa_piRNA_13295	DQ580664P	5.71274	8.65873	0.64707	0.0062226	0.07203	1	BEND3
666	piR-54514	hsa_piRNA_7557	DQ587402P	0.98352	1.5313	0.64806	0.00154469	0.03544	1	QSOX1
1025	piR-61820	hsa_piRNA_251	DQ595708P	0.2692	0.42028	0.64903	0.0035641	0.05313	1	GTF2IRD1P1,KCTD7,RABGEF1
1128	piR-39282	hsa_piRNA_22789	DQ601216P	1.2324	1.92299	0.65001	0.0045012	0.06097	1
597	piR-35519	hsa_piRNA_26552	DQ597453P	0.33094	0.51947	0.65459	0.0012368	0.03165	1
642	piR-49142	hsa_piRNA_12929	DQ581030P	0.29678	0.47029	0.65488	0.00145704	0.03468	1
1189	piR-45316	hsa_piRNA_16755	DQ577204P	0.30844	0.47913	0.65497	0.0049448	0.06354	1	PPP1R15B,RP11-739N20.2
952	piR-31511	hsa_piRNA_30560	DQ571399P	5.36778	8.16658	0.65743	0.0030992	0.04974	1	ADCY4
233	piR-46184	hsa_piRNA_15887	DQ578072P	0.32596	0.51615	0.65897	0.000196647	0.0129	1	FAM225A,FAM225B
932	piR-54670	hsa_piRNA_7401	DQ587558P	0.30029	0.46096	0.66003	0.0029835	0.04891	1
1361	piR-54476	hsa_piRNA_7595	DQ587364P	0.1327	0.20157	0.66082	0.0066217	0.07434	1
1355	piR-45110	hsa_piRNA_16961	DQ576998P	0.42483	0.64119	0.66242	0.006564	0.07402	1
1511	piR-53297	hsa_piRNA_8774	DQ586185P	0.18314	0.29414	0.66276	0.0082807	0.08373	1
517	piR-60936	hsa_piRNA_1135	DQ594824P	0.24728	0.38236	0.66314	0.0009001	0.0266	1
1259	piR-41139	hsa_piRNA_20932	DQ573027P	0.46795	0.75369	0.66316	0.0056448	0.0685	1
253	piR-56256	hsa_piRNA_5815	DQ589144P	0.32582	0.51146	0.66718	0.00023591	0.01425	1	FAM225B,FAM225A
547	piR-50527	hsa_piRNA_11544	DQ583415P	0.70025	1.08491	0.66802	0.00102233	0.02856	1	CCSER1
1642	piR-61782	hsa_piRNA_289	DQ595670P	0.66676	1.00853	0.66857	0.0098968	0.09209	1
994	piR-45205	hsa_piRNA_16866	DQ577093P	0.76609	1.23401	0.66912	0.0033777	0.05192	1	RP11-1415C14.2,RP11-1415C14.3,RP11-1415C14.1,RP11-589F5.4,RP11-98J23.2,GUSBP3,RP11-1198D22.3,RP11-497H16.6,RP11-974F13.5,RP11-98J23.1,RP11-497H16.4,RP11-848G14.5,RP11-589F5.3,RP11-497H16.2,RP11-1198D22.1,RP11-497H16.5,RP11-1198D22.2
735	piR-32961	hsa_piRNA_29110	DQ582849P	0.75724	1.21775	0.66936	0.00187892	0.03906	1
500	piR-35639	hsa_piRNA_26432	DQ597573P	0.97768	1.49538	0.66978	0.00084112	0.0257	1	GOLGA2P11
1045	piR-53076	hsa_piRNA_8995	DQ585964P	0.7583	1.16841	0.6755	0.0037201	0.05439	1	CSPG4P4Y,CSPG4P8,DNM1P51,CSPG4P11,CSPG4P5,CSPG4P12,CSPG4P3Y
200	piR-33044	hsa_piRNA_29027	DQ592932P	100.012	159.247	0.67683	0.000124518	0.00951	1	SMC5,RP11-386J22.3,Y_RNA
868	piR-39060	hsa_piRNA_23011	DQ600994P	1.34847	2.15766	0.68903	0.0026777	0.04713	1	RP4-561L24.3
1160	piR-38407	hsa_piRNA_23664	DQ600341P	2.58343	4.16751	0.69226	0.0047567	0.06265	1	PTCD3
468	piR-42489	hsa_piRNA_19582	DQ574377P	0.15082	0.23866	0.69343	0.00073617	0.02403	1
956	piR-56436	hsa_piRNA_5635	DQ589324P	0.29451	0.47418	0.69362	0.0031195	0.04986	1	TMEM185B
1162	piR-44628	hsa_piRNA_17443	DQ576516P	0.5671	0.92225	0.69382	0.0047583	0.06257	1
1519	piR-38729	hsa_piRNA_23342	DQ600663P	0.3887	0.58755	0.6949	0.0083596	0.08409	1	SWSAP1
522	piR-47025	hsa_piRNA_15046	DQ578913P	0.83055	1.34205	0.69623	0.00092086	0.02695	1
692	piR-42816	hsa_piRNA_19255	DQ574704P	1.18917	1.92428	0.69789	0.00168154	0.03713	1
204	piR-33851	hsa_piRNA_28220	DQ593739P	1.04618	1.72894	0.69792	0.000137169	0.01027	1
1252	piR-55661	hsa_piRNA_6410	DQ588549P	0.15557	0.24174	0.69824	0.005596	0.06829	1
613	piR-33541	hsa_piRNA_28530	DQ593429P	0.32235	0.49129	0.69833	0.0012968	0.03232	1	CYP19A1
1289	piR-53187	hsa_piRNA_8884	DQ586075P	0.53434	0.8119	0.70098	0.0059428	0.07044	1	LRRC14
876	piR-55269	hsa_piRNA_6802	DQ588157P	1.74999	2.90072	0.70493	0.0027173	0.04739	1	ATP5S
998	piR-53801	hsa_piRNA_8270	DQ586689P	0.35484	0.55039	0.70508	0.0034008	0.05206	1
1195	piR-33059	hsa_piRNA_29012	DQ592947P	0.62517	0.94972	0.70562	0.0050161	0.06413	1	LIMD2
1626	piR-56447	hsa_piRNA_5624	DQ589335P	0.31793	0.49761	0.70571	0.0096624	0.09079	1
1624	piR-54448	hsa_piRNA_7623	DQ587336P	0.16998	0.26554	0.70943	0.0096422	0.09072	1	RP1-37N7.1,EVPLL
511	piR-48456	hsa_piRNA_13615	DQ580344P	1.69561	2.70156	0.70968	0.00088157	0.02636	1	HLA-C
685	piR-42931	hsa_piRNA_19140	DQ574819P	0.23524	0.36905	0.7123	0.0016244	0.03623	1	RP11-43F13.1
1587	piR-61675	hsa_piRNA_396	DQ595563P	0.28017	0.45775	0.71279	0.0090621	0.08725	1
915	piR-60836	hsa_piRNA_1235	DQ594724P	0.30756	0.49731	0.71463	0.0028806	0.0481	1	LINC00837
628	piR-60558	hsa_piRNA_1513	DQ594446P	0.38609	0.63463	0.71816	0.00136163	0.03313	1
1451	piR-31481	hsa_piRNA_30590	DQ571369P	2.11304	3.57245	0.71829	0.0075789	0.07981	1
635	piR-41288	hsa_piRNA_20783	DQ573176P	0.30544	0.50309	0.72004	0.0014173	0.0341	1	RP11-677O4.2
518	piR-36172	hsa_piRNA_25899	DQ598106P	1.12036	1.87292	0.72165	0.00090195	0.0266	1
1364	piR-57861	hsa_piRNA_4210	DQ590749P	0.18476	0.29399	0.72168	0.0066619	0.07462	1	CTC-523E23.4
32	piR-50721	hsa_piRNA_11350	DQ583609P	3.0457	5.0291	0.7238	2.4499e-06	0.00117	0.03743	BCR,BCRP4,BCRP3
1002	piR-44603	hsa_piRNA_17468	DQ576491P	0.60494	1.01244	0.72465	0.0034384	0.05243	1	MEMO1,DPY30
1132	piR-45188	hsa_piRNA_16883	DQ577076P	4.07698	7.39013	0.72875	0.0045181	0.06098	1
1464	piR-59261	hsa_piRNA_2810	DQ592149P	1.53528	2.38178	0.72958	0.0077229	0.0806	1	GOLGA2P10,CSPG4P8
883	piR-57592	hsa_piRNA_4479	DQ590480P	0.65131	1.03235	0.72962	0.0027604	0.04776	1	SCRN1
1333	piR-54341	hsa_piRNA_7730	DQ587229P	1.1636	1.94366	0.7298	0.0063613	0.07291	1
545	piR-46179	hsa_piRNA_15892	DQ578067P	0.30775	0.49806	0.7354	0.00102046	0.02861	1
555	piR-33665	hsa_piRNA_28406	DQ593553P	0.7694	1.23399	0.73592	0.00104475	0.02876	1	POM121L1P,POM121L1P,FAM230B,POM121L9P,POM121L4P,POM121L7,FAM230B,POM121L8P,POM121L9P,POM121L7,POM121L10P
1122	piR-32030	hsa_piRNA_30041	DQ581918P	0.1352	0.21719	0.74375	0.0044215	0.06021	1	ANKRD18A,ANKRD18A,RP11-392E22.11
625	piR-60570	hsa_piRNA_1501	DQ594458P	0.45487	0.77085	0.74729	0.00135893	0.03322	1
990	piR-51797	hsa_piRNA_10274	DQ584685P	1.5266	2.48034	0.74978	0.0033428	0.05159	1	CTC-523E23.4
1156	piR-57811	hsa_piRNA_4260	DQ590699P	0.15777	0.24823	0.75065	0.0047248	0.06245	1	CTC-523E23.4,CTC-523E23.1
778	piR-60106	hsa_piRNA_1965	DQ593994P	0.12758	0.20784	0.75241	0.0021563	0.04235	1	ELFN2,RP1-63G5.5
1581	piR-35600	hsa_piRNA_26471	DQ597534P	0.17737	0.28666	0.75248	0.0090037	0.08701	1
1495	piR-60679	hsa_piRNA_1392	DQ594567P	0.21037	0.34628	0.753	0.008039	0.08216	1	FAM225A,FAM225B
1484	piR-46818	hsa_piRNA_15253	DQ578706P	0.17151	0.26954	0.75625	0.0079418	0.08177	1	CTD-2054N24.1,DNM1P46
502	piR-58535	hsa_piRNA_3536	DQ591423P	0.17449	0.28267	0.75687	0.00085935	0.02616	1	BIN3,CCAR2
1510	piR-43710	hsa_piRNA_18361	DQ575598P	2.47972	3.82876	0.75845	0.0082619	0.0836	1
1375	piR-35764	hsa_piRNA_26307	DQ597698P	0.39179	0.64457	0.75917	0.0067836	0.07538	1	CANT1
534	piR-56320	hsa_piRNA_5751	DQ589208P	0.19474	0.33083	0.75931	0.00096074	0.02749	1	GOSR2,RP11-156P1.2
1345	piR-33211	hsa_piRNA_28860	DQ593099P	8.15096	12.4484	0.76145	0.0065028	0.07387	1
779	piR-60567	hsa_piRNA_1504	DQ594455P	0.13173	0.22482	0.76384	0.0021563	0.04229	1	CTD-2054N24.1,DNM1P46
343	piR-46987	hsa_piRNA_15084	DQ578875P	0.12198	0.20659	0.76411	0.00041737	0.01859	1
1382	piR-56271	hsa_piRNA_5800	DQ589159P	0.32623	0.57766	0.7654	0.0069167	0.07647	1	NEU3
348	piR-54649	hsa_piRNA_7422	DQ587537P	0.46261	0.77395	0.76585	0.00041963	0.01842	1	RP11-12J10.3,FAM53B
118	piR-41968	hsa_piRNA_20103	DQ573856P	0.19258	0.32618	0.7662	4.3613e-05	0.00565	0.66636	GOLGA2P11
886	piR-31459	hsa_piRNA_30612	DQ571347P	2.74713	4.81336	0.76623	0.0027636	0.04766	1	RP11-386M24.3
449	piR-33501	hsa_piRNA_28570	DQ593389P	0.34255	0.58601	0.77693	0.00068085	0.02317	1	WDFY3
418	piR-53062	hsa_piRNA_9009	DQ585950P	0.70197	1.18241	0.77835	0.00060154	0.02199	1
861	piR-61460	hsa_piRNA_611	DQ595348P	0.39055	0.65317	0.78089	0.0026377	0.04681	1
405	piR-50974	hsa_piRNA_11097	DQ583862P	0.27825	0.44447	0.78176	0.00057998	0.02188	1	FAM225B
1255	piR-47908	hsa_piRNA_14163	DQ579796P	0.21554	0.3661	0.78288	0.0056201	0.06842	1
136	piR-33043	hsa_piRNA_29028	DQ592931P	160.08	275.246	0.78392	6.224e-05	0.00699	0.95096
1616	piR-50795	hsa_piRNA_11276	DQ583683P	1.48384	2.45327	0.78416	0.0095213	0.09002	1	RP11-299H22.3
1111	piR-31349	hsa_piRNA_30722	DQ571237P	0.70103	1.19101	0.78971	0.0043196	0.05941	1	GOLM1
527	piR-40051	hsa_piRNA_22020	DQ571939P	1.49111	2.53216	0.7917	0.00092392	0.02679	1
1571	piR-59412	hsa_piRNA_2659	DQ592300P	1.12416	1.88268	0.79296	0.0089011	0.08657	1	TTC33,CCSER1,RP11-384J4.2,RP11-1029J19.5,DST
1112	piR-35609	hsa_piRNA_26462	DQ597543P	0.76798	1.28521	0.79559	0.0043377	0.0596	1	LINC01016
1039	piR-33261	hsa_piRNA_28810	DQ593149P	0.86324	1.45305	0.79943	0.0036791	0.0541	1	RP3-468B3.2
771	piR-31970	hsa_piRNA_30101	DQ571858P	3.71333	6.38707	0.79989	0.0020762	0.04114	1	SNORD4A,RPL23A,SNORD4A
1384	piR-35914	hsa_piRNA_26157	DQ597848P	0.38913	0.66571	0.80479	0.0069354	0.07657	1	INHBA,AC005027.3
1611	piR-44641	hsa_piRNA_17430	DQ576529P	0.11171	0.18066	0.80546	0.0094756	0.08987	1	SMURF1
1366	piR-31694	hsa_piRNA_30377	DQ571582P	0.43542	0.67583	0.80663	0.0066808	0.07473	1
702	piR-50645	hsa_piRNA_11426	DQ583533P	0.537	0.90563	0.80676	0.00174102	0.03789	1	LINC00905
1174	piR-59130	hsa_piRNA_2941	DQ592018P	0.21783	0.38017	0.80683	0.0048157	0.06267	1
1099	piR-55304	hsa_piRNA_6767	DQ588192P	0.13158	0.22652	0.80684	0.0041766	0.05807	1
1009	piR-49969	hsa_piRNA_12102	DQ581857P	10.3095	17.6754	0.80716	0.0034799	0.0527	1	BTBD9
1538	piR-46099	hsa_piRNA_15972	DQ577987P	0.69682	1.07655	0.8078	0.0085025	0.08447	1	RP11-299H22.3
401	piR-36149	hsa_piRNA_25922	DQ598083P	0.16574	0.27853	0.80953	0.00056471	0.02152	1	RTDR1,GNAZ
247	piR-56396	hsa_piRNA_5675	DQ589284P	0.1518	0.26857	0.81184	0.00022015	0.01362	1
478	piR-33514	hsa_piRNA_28557	DQ593402P	0.43472	0.77208	0.81444	0.00075642	0.02418	1	SPATA31C2
1140	piR-44908	hsa_piRNA_17163	DQ576796P	0.41013	0.68747	0.81453	0.0046153	0.06186	1	NOTCH2NL,NOTCH2NL
1502	piR-31299	hsa_piRNA_30772	DQ571187P	0.90976	1.61731	0.81688	0.0081397	0.0828	1
166	piR-36189	hsa_piRNA_25882	DQ598123P	0.76024	1.3128	0.82432	8.4899e-05	0.00781	1
797	piR-42242	hsa_piRNA_19829	DQ574130P	0.16145	0.2864	0.82487	0.0022436	0.04301	1
1644	piR-50313	hsa_piRNA_11758	DQ583201P	0.5593	0.98668	0.82651	0.0099194	0.09219	1	RP1-63G5.5
713	piR-56216	hsa_piRNA_5855	DQ589104P	5.25703	9.06973	0.82904	0.00178493	0.03825	1	MPRIP,CDR2L,RP11-45M22.3
1300	piR-36378	hsa_piRNA_25693	DQ598312P	5.79189	10.5779	0.82928	0.0060773	0.07143	1	PDHX,RAB11A,POM121L2
1321	piR-44705	hsa_piRNA_17366	DQ576593P	0.23438	0.39408	0.82955	0.0062364	0.07213	1	USP6,TBC1D3P4,TBC1D3P3
467	piR-58914	hsa_piRNA_3157	DQ591802P	0.22925	0.41845	0.83014	0.00072485	0.02372	1	RDM1
1263	piR-50622	hsa_piRNA_11449	DQ583510P	0.1826	0.29263	0.83045	0.0056778	0.06869	1	RP1-63G5.5
1535	piR-43603	hsa_piRNA_18468	DQ575491P	0.12172	0.20484	0.83181	0.0084815	0.08442	1	RP11-299H22.3
931	piR-55245	hsa_piRNA_6826	DQ588133P	0.18782	0.31991	0.83317	0.0029821	0.04894	1	RP11-545A16.3
1397	piR-61049	hsa_piRNA_1022	DQ594937P	0.21803	0.38071	0.83671	0.0070584	0.0772	1	CYP19A1
800	piR-45215	hsa_piRNA_16856	DQ577103P	0.86037	1.50463	0.84448	0.0022981	0.04389	1	RHOC,RP11-426L16.10
335	piR-31342	hsa_piRNA_30729	DQ571230P	0.28127	0.50129	0.84676	0.00039691	0.0181	1	CAND2,RP11-723O4.2,AC034198.7
167	piR-46865	hsa_piRNA_15206	DQ578753P	0.49663	0.89083	0.84833	8.4983e-05	0.00778	1	AC114776.3
1056	piR-44564	hsa_piRNA_17507	DQ576452P	0.12773	0.22178	0.84916	0.003843	0.0556	1
1494	piR-37011	hsa_piRNA_25060	DQ598945P	0.12616	0.2198	0.85146	0.0080387	0.08221	1	MANF
953	piR-50163	hsa_piRNA_11908	DQ583051P	0.18209	0.32338	0.85187	0.0031022	0.04974	1	SRGAP2D,SRGAP2,SRGAP2-AS1,SRGAP2C
451	piR-50763	hsa_piRNA_11308	DQ583651P	0.14429	0.25868	0.85222	0.00068398	0.02317	1	NPAP1
791	piR-59058	hsa_piRNA_3013	DQ591946P	2.12647	3.66103	0.85437	0.0022234	0.04295	1	RP11-356C4.6,FAM157C
1508	piR-35510	hsa_piRNA_26561	DQ597444P	0.12778	0.22096	0.85821	0.0082392	0.08348	1
554	piR-52248	hsa_piRNA_9823	DQ585136P	0.58621	1.05688	0.86004	0.00104466	0.02881	1	RP11-299H22.3
1567	piR-56988	hsa_piRNA_5083	DQ589876P	0.11135	0.18755	0.86037	0.0088617	0.08641	1	RP11-164C12.2,RP11-266O8.1
924	piR-48353	hsa_piRNA_13718	DQ580241P	0.16304	0.28759	0.86147	0.0029245	0.04836	1	NPAP1P6
917	piR-60900	hsa_piRNA_1171	DQ594788P	0.58122	0.94555	0.86763	0.0028966	0.04826	1
1554	piR-60382	hsa_piRNA_1689	DQ594270P	0.1182	0.20378	0.86801	0.0087172	0.08571	1	LINC01016,RP3-468B3.2
804	piR-48765	hsa_piRNA_13306	DQ580653P	4.52089	8.00734	0.86921	0.0023197	0.04408	1	RP11-1033A18.1,HSP90AA1
1214	piR-59210	hsa_piRNA_2861	DQ592098P	0.16161	0.28614	0.86969	0.0051776	0.06516	1	CHCHD6
528	piR-51820	hsa_piRNA_10251	DQ584708P	0.28792	0.51858	0.87258	0.00093991	0.0272	1	UPF1
403	piR-36425	hsa_piRNA_25646	DQ598359P	0.38865	0.70689	0.87706	0.00057818	0.02192	1	RP11-17M15.2
1262	piR-33078	hsa_piRNA_28993	DQ592966P	0.11996	0.21025	0.87856	0.0056776	0.06874	1	RP11-434D2.3,TBC1D3P3,TBC1D3P4
754	piR-45182	hsa_piRNA_16889	DQ577070P	3.03209	5.89183	0.87857	0.00196376	0.03979	1	CYP19A1,RP11-108K3.1
1169	piR-30295	hsa_piRNA_31776	DQ570183P	0.21078	0.37192	0.88592	0.004784	0.06253	1	TNFAIP1
677	piR-47313	hsa_piRNA_14758	DQ579201P	0.63941	1.15755	0.88858	0.00158308	0.03573	1	RP11-299H22.3
834	piR-58233	hsa_piRNA_3838	DQ591121P	0.36814	0.68661	0.89205	0.0025022	0.04584	1
497	piR-51808	hsa_piRNA_10263	DQ584696P	0.21995	0.40676	0.89496	0.00083818	0.02577	1
135	piR-39481	hsa_piRNA_22590	DQ601415P	1.66158	3.08675	0.89572	6.1748e-05	0.00699	0.94345	ATF4
1467	piR-45757	hsa_piRNA_16314	DQ577645P	0.43549	0.71395	0.89718	0.0077645	0.08087	1	RP11-753D20.1
682	piR-52246	hsa_piRNA_9825	DQ585134P	0.19134	0.3503	0.89747	0.00161904	0.03627	1	SYVN1,MRPL49
877	piR-45367	hsa_piRNA_16704	DQ577255P	0.59579	1.04038	0.89952	0.0027193	0.04738	1	RP11-299H22.3
442	piR-59255	hsa_piRNA_2816	DQ592143P	0.35153	0.63648	0.90139	0.00065603	0.02268	1
1401	piR-59514	hsa_piRNA_2557	DQ592402P	0.60509	0.9896	0.90215	0.0070841	0.07726	1
1363	piR-61524	hsa_piRNA_547	DQ595412P	0.52216	0.96235	0.90219	0.0066415	0.07445	1	RP11-145G20.1,DTNBP1
1017	piR-32481	hsa_piRNA_29590	DQ582369P	0.5907	1.05486	0.91296	0.0035379	0.05315	1	TBCA
674	piR-44419	hsa_piRNA_17652	DQ576307P	0.377	0.72066	0.91344	0.00158037	0.03583	1	RP3-468B3.2,LINC01016
1037	piR-52177	hsa_piRNA_9894	DQ585065P	1.20339	2.27707	0.91398	0.0036637	0.05398	1	RP3-468B3.2
1290	piR-45642	hsa_piRNA_16429	DQ577530P	0.14565	0.23708	0.91509	0.0059561	0.07055	1	DNM1P47,GOLGA8VP,RN7SL209P
705	piR-57859	hsa_piRNA_4212	DQ590747P	0.89267	1.65469	0.91979	0.00175567	0.03805	1	AC079742.4,ZDHHC4
1191	piR-52490	hsa_piRNA_9581	DQ585378P	1.17314	2.20797	0.92211	0.0049785	0.06387	1	RP11-522B15.3
1264	piR-32537	hsa_piRNA_29534	DQ582425P	3.03656	5.75081	0.92259	0.0056804	0.06866	1
1078	piR-48511	hsa_piRNA_13560	DQ580399P	0.27717	0.51435	0.9247	0.0039772	0.05637	1	MCL1
1411	piR-52982	hsa_piRNA_9089	DQ585870P	0.5713	0.98973	0.93431	0.0071975	0.07794	1	RP11-544M22.13,F11R
432	piR-56149	hsa_piRNA_5922	DQ589037P	0.18318	0.34707	0.93554	0.00063595	0.02249	1	FAM225A,FAM225B
559	piR-52436	hsa_piRNA_9635	DQ585324P	7.21386	13.4525	0.93566	0.00107955	0.02951	1
1369	piR-38172	hsa_piRNA_23899	DQ600106P	0.33499	0.62541	0.94154	0.0067166	0.07496	1
1281	piR-60489	hsa_piRNA_1582	DQ594377P	0.66417	1.19468	0.94523	0.0058152	0.06936	1
514	piR-47284	hsa_piRNA_14787	DQ579172P	0.40163	0.80357	0.94605	0.00089842	0.02671	1
317	piR-48687	hsa_piRNA_13384	DQ580575P	0.49203	0.93636	0.95029	0.00033715	0.01625	1	RP11-463O12.3,VPS37B
793	piR-49062	hsa_piRNA_13009	DQ580950P	0.25574	0.45418	0.95472	0.0022391	0.04314	1	SYNRG
1609	piR-60283	hsa_piRNA_1788	DQ594171P	0.44933	0.77243	0.95994	0.0094368	0.08961	1	TRIM14,TRIM14
543	piR-36476	hsa_piRNA_25595	DQ598410P	1.45613	2.74792	0.96047	0.00099688	0.02805	1
1500	piR-32207	hsa_piRNA_29864	DQ582095P	1.81903	3.31753	0.96388	0.0081194	0.0827	1
1278	piR-47341	hsa_piRNA_14730	DQ579229P	0.49783	0.93552	0.97821	0.0057827	0.06913	1	GFPT1,CCDC7,RP11-195O1.5
1318	piR-43780	hsa_piRNA_18291	DQ575668P	0.13495	0.24121	0.9784	0.0062171	0.07207	1
1019	piR-56150	hsa_piRNA_5921	DQ589038P	0.11905	0.22984	0.97957	0.0035402	0.05308	1
1548	piR-53352	hsa_piRNA_8719	DQ586240P	0.63458	1.3261	0.99558	0.0086181	0.08506	1
726	piR-61545	hsa_piRNA_526	DQ595433P	0.16211	0.31467	0.99779	0.00183911	0.0387	1	LINC00837
1053	piR-54549	hsa_piRNA_7522	DQ587437P	0.22537	0.44298	0.99808	0.0038011	0.05515	1	RP11-156P1.3,RP11-156P1.2,RP11-927P21.1,LRRC37A,RP11-527L4.5,LRRC37A4P,LRRC37A2,RP11-798G7.6,ARL17B,LRRC37A3,LRRC37A17P
878	piR-35994	hsa_piRNA_26077	DQ597928P	0.39196	0.76415	0.99968	0.0027207	0.04735	1
1120	piR-61607	hsa_piRNA_464	DQ595495P	0.11409	0.21575	1.0035	0.004419	0.06028	1	TRIM39,TRIM39-RPP21
729	piR-48792	hsa_piRNA_13279	DQ580680P	1.70461	3.67398	1.00398	0.00184468	0.03866	1
988	piR-46577	hsa_piRNA_15494	DQ578465P	0.45063	0.7931	1.00406	0.003339	0.05164	1
538	piR-40050	hsa_piRNA_22021	DQ571938P	1.52304	2.9815	1.00961	0.00096458	0.02739	1
1354	piR-44570	hsa_piRNA_17501	DQ576458P	0.10698	0.19575	1.01044	0.0065596	0.07402	1
810	piR-56744	hsa_piRNA_5327	DQ589632P	0.16099	0.31754	1.01275	0.0023583	0.04448	1	CPT1A
316	piR-56433	hsa_piRNA_5638	DQ589321P	1.65648	3.25583	1.01519	0.00033635	0.01626	1
1298	piR-38733	hsa_piRNA_23338	DQ600667P	0.58358	0.99183	1.01884	0.0060635	0.07137	1	CAND2
627	piR-61406	hsa_piRNA_665	DQ595294P	0.17155	0.33431	1.02017	0.00136013	0.03314	1
807	piR-45932	hsa_piRNA_16139	DQ577820P	2.20719	4.43085	1.02787	0.0023356	0.04422	1	CHIC1,GABRA6,RP11-523L20.2,RP11-370I10.6,SLC9A7,AC144449.1,AC007364.1,ITGBL1,AIG1,SPIDR,RP11-661P17.1,AC019330.1,FGF13,AKT3,DERA,CD2AP,CTD-2277K2.1,TIGIT,CYP2C18,LINC01182,DMXL2,CASC9,CSMD1,UNC13C,DLG2,SLCO1A2,SPIDR,FIP1L1,RP11-400G3.5,MACROD2,PHACTR2,GRM5,C16orf97,CNTN5,C2orf88,AC002463.3,CSRNP3,ROBO1,ANKRD12,CYP27C1,RP11-310E22.5,KCNK2,LINC01184,RP11-945A11.1,THSD7B,RP11-446J8.1
201	piR-56162	hsa_piRNA_5909	DQ589050P	0.22291	0.45148	1.03129	0.000124849	0.00949	1	N4BP1
1083	piR-55789	hsa_piRNA_6282	DQ588677P	1.57392	3.10424	1.03291	0.0039987	0.05641	1	CSPG4P12,CSPG4P8,GOLGA2P7
1212	piR-51818	hsa_piRNA_10253	DQ584706P	0.17689	0.35905	1.03461	0.0051755	0.06524	1	RP11-146D12.2
190	piR-31288	hsa_piRNA_30783	DQ571176P	0.74648	1.51673	1.03629	0.000118791	0.00955	1	RP11-426L16.10,RHOC
1020	piR-45756	hsa_piRNA_16315	DQ577644P	0.66751	1.1823	1.03716	0.0035412	0.05305	1	RP11-753D20.1
706	piR-48015	hsa_piRNA_14056	DQ579903P	0.99025	2.11794	1.03765	0.00175691	0.03802	1
1569	piR-40765	hsa_piRNA_21306	DQ572653P	0.31047	0.55628	1.03883	0.0088803	0.08648	1	RP11-753D20.1
160	piR-32058	hsa_piRNA_30013	DQ581946P	0.56066	1.14685	1.04164	8.0791e-05	0.00772	1	PRMT8
923	piR-54635	hsa_piRNA_7436	DQ587523P	1.48207	3.09969	1.05061	0.0029234	0.04839	1	RP1-63G5.5
1463	piR-37261	hsa_piRNA_24810	DQ599195P	0.12688	0.24112	1.05514	0.007722	0.08065	1	DNM1P47
1550	piR-45264	hsa_piRNA_16807	DQ577152P	0.28876	0.61734	1.05646	0.0086433	0.0852	1	RP3-468B3.2
867	piR-47700	hsa_piRNA_14371	DQ579588P	0.52108	1.03897	1.05677	0.0026773	0.04718	1	ZKSCAN7,RP11-944L7.5,RP11-944L7.4,ZNF660
476	piR-31516	hsa_piRNA_30555	DQ571404P	0.13575	0.27358	1.05961	0.00074472	0.0239	1	LIMD1
1485	piR-34020	hsa_piRNA_28051	DQ593908P	0.28712	0.54584	1.05988	0.0079568	0.08187	1	AC138035.2,LINC01001,FAM157C,LINC00265,RP11-34P13.13,RP11-304M2.3,RP11-384K6.6,LINC01002,RP11-356C4.5
679	piR-38114	hsa_piRNA_23957	DQ600048P	0.12542	0.25748	1.06158	0.00160063	0.03602	1	PRMT8
1236	piR-61787	hsa_piRNA_284	DQ595675P	0.50587	0.99622	1.06984	0.0054565	0.06745	1	ZNF778
1358	piR-40052	hsa_piRNA_22019	DQ571940P	0.53668	0.97138	1.07169	0.0065993	0.07425	1
1235	piR-32443	hsa_piRNA_29628	DQ582331P	0.21248	0.43704	1.07747	0.0054564	0.0675	1	AP001628.7
747	piR-51878	hsa_piRNA_10193	DQ584766P	1.5628	3.0455	1.08108	0.00194096	0.0397	1	RP11-169D4.1,EVL,ANKRD36,CLVS1,CHM,LINC01317,ANKRD36C,COMMD10,IL1RAPL1,OPHN1,DCDC2,FBXO39,AP001626.1,BICD1,ANKMY1,PTPRN2,SHPRH,RP11-545I5.3,TUSC3,ANKRD36B,ADCY2,PCNXL4,PSAP,STPG2
424	piR-47195	hsa_piRNA_14876	DQ579083P	0.13546	0.27485	1.0836	0.00061828	0.02228	1	RP11-451H23.3
1115	piR-61293	hsa_piRNA_778	DQ595181P	0.09861	0.19491	1.08609	0.0043645	0.05981	1	HCG18,HCG17
1135	piR-36089	hsa_piRNA_25982	DQ598023P	0.87869	1.93478	1.08689	0.004544	0.06117	1	TMEM181
548	piR-60466	hsa_piRNA_1605	DQ594354P	3.18228	6.44488	1.08718	0.00102452	0.02857	1	PRELID1P3,RP11-543B16.2,RP11-323I15.5,PRELID1P4,JMJD1C
858	piR-51628	hsa_piRNA_10443	DQ584516P	0.19983	0.37285	1.08779	0.002621	0.04667	1
584	piR-41852	hsa_piRNA_20219	DQ573740P	0.18279	0.3932	1.09917	0.00117729	0.0308	1	RP11-944L7.4,ZKSCAN7,RP11-944L7.5,ZNF660,MPRIP
1159	piR-36155	hsa_piRNA_25916	DQ598089P	1.60305	3.22691	1.10012	0.0047413	0.0625	1	PAAF1
441	piR-59078	hsa_piRNA_2993	DQ591966P	0.85384	1.78867	1.10589	0.00065526	0.0227	1	EXTL3
942	piR-52191	hsa_piRNA_9880	DQ585079P	0.89812	1.88574	1.10726	0.0030401	0.04931	1
1434	piR-48138	hsa_piRNA_13933	DQ580026P	0.15751	0.35632	1.10801	0.0074218	0.07908	1
1374	piR-48909	hsa_piRNA_13162	DQ580797P	2.15755	4.2601	1.10871	0.006776	0.07535	1
910	piR-47422	hsa_piRNA_14649	DQ579310P	0.31385	0.62283	1.11162	0.0028752	0.04827	1	ZBED5
551	piR-48882	hsa_piRNA_13189	DQ580770P	1.79637	3.58961	1.11622	0.00103931	0.02882	1	RP11-126O22.1,RP11-126O22.1,RP11-126O22.1,RP11-126O22.1,RP11-126O22.1
1630	piR-60654	hsa_piRNA_1417	DQ594542P	0.10238	0.18929	1.11652	0.0097371	0.09127	1
396	piR-53871	hsa_piRNA_8200	DQ586759P	2.06144	4.45662	1.12039	0.00055907	0.02157	1	NOTCH2NL,NOTCH2NL
421	piR-33390	hsa_piRNA_28681	DQ593278P	0.78735	1.82985	1.12543	0.00060337	0.0219	1	NAV2
964	piR-60905	hsa_piRNA_1166	DQ594793P	0.19574	0.40029	1.12607	0.0031976	0.05068	1
145	piR-48056	hsa_piRNA_14015	DQ579944P	1.2301	2.74415	1.12862	7.5814e-05	0.00799	1	AC007566.10,GATAD1
1136	piR-30305	hsa_piRNA_31766	DQ570193P	0.46604	0.98965	1.132	0.0045577	0.0613	1	ZKSCAN7,RP11-944L7.5,RP11-944L7.4,ZNF660,MPRIP
462	piR-34413	hsa_piRNA_27658	DQ596347P	0.2048	0.43323	1.13282	0.00070297	0.02325	1	JOSD1
974	piR-53485	hsa_piRNA_8586	DQ586373P	0.45804	0.95149	1.13535	0.0032389	0.05081	1	GK3P
499	piR-58016	hsa_piRNA_4055	DQ590904P	0.31471	0.67458	1.14869	0.00083976	0.02571	1	PLIN3
168	piR-36200	hsa_piRNA_25871	DQ598134P	0.14105	0.31194	1.15212	9.5301e-05	0.00867	1
488	piR-31095	hsa_piRNA_30976	DQ570983P	5.37996	11.5247	1.15318	0.00078015	0.02443	1
1585	piR-56757	hsa_piRNA_5314	DQ589645P	1.50248	3.324	1.16123	0.0090355	0.0871	1	LINC00905
561	piR-32561	hsa_piRNA_29510	DQ582449P	0.83775	1.79735	1.16492	0.00108075	0.02943	1
934	piR-54854	hsa_piRNA_7217	DQ587742P	2.44593	5.56203	1.17235	0.0029982	0.04905	1	RP11-514P8.7,HSPC047,RASA4
578	piR-56590	hsa_piRNA_5481	DQ589478P	0.1916	0.41462	1.17325	0.00112385	0.02971	1
1295	piR-33516	hsa_piRNA_28555	DQ593404P	0.45871	1.1008	1.17636	0.0059989	0.07078	1
287	piR-36222	hsa_piRNA_25849	DQ598156P	0.09947	0.21821	1.17711	0.00028345	0.01509	1	TRIM14
241	piR-48642	hsa_piRNA_13429	DQ580530P	0.2301	0.51562	1.17828	0.00020377	0.01292	1
577	piR-54310	hsa_piRNA_7761	DQ587198P	0.32112	0.70352	1.18091	0.00112351	0.02975	1	RP11-545A16.3
485	piR-32562	hsa_piRNA_29509	DQ582450P	0.71143	1.54568	1.18578	0.00076303	0.02404	1
1312	piR-61841	hsa_piRNA_230	DQ595729P	0.61845	1.23296	1.1881	0.0061646	0.07179	1	FAM225A,FAM225B
806	piR-51188	hsa_piRNA_10883	DQ584076P	0.33623	0.76483	1.1895	0.0023249	0.04407	1
822	piR-53748	hsa_piRNA_8323	DQ586636P	17.5106	37.6552	1.19215	0.0024249	0.04507	1	ZP1
727	piR-53117	hsa_piRNA_8954	DQ586005P	1.66516	3.63632	1.19669	0.0018399	0.03867	1	RP11-434D2.10
461	piR-43862	hsa_piRNA_18209	DQ575750P	0.13335	0.29762	1.20154	0.0007029	0.0233	1
1381	piR-57330	hsa_piRNA_4741	DQ590218P	0.13276	0.26542	1.20429	0.006899	0.07633	1	RNF185,AC097533.1
227	piR-33712	hsa_piRNA_28359	DQ593600P	0.63621	1.44956	1.20483	0.000179968	0.01211	1	IFI27L1
1424	piR-56818	hsa_piRNA_5253	DQ589706P	0.10866	0.21385	1.20634	0.0073556	0.07892	1
792	piR-57628	hsa_piRNA_4443	DQ590516P	1.49065	3.11101	1.2113	0.002239	0.04319	1	TOLLIP
962	piR-53746	hsa_piRNA_8325	DQ586634P	15.5035	34.1158	1.21142	0.0031609	0.0502	1	FAR2P4,PLEKHB2
1328	piR-36307	hsa_piRNA_25764	DQ598241P	0.27938	0.67817	1.2158	0.0063356	0.07289	1
1040	piR-45041	hsa_piRNA_17030	DQ576929P	0.58478	1.41375	1.22201	0.0036824	0.0541	1	PRMT8
459	piR-61565	hsa_piRNA_506	DQ595453P	0.09825	0.2239	1.22241	0.00070073	0.02333	1	RP11-299H22.3
411	piR-50239	hsa_piRNA_11832	DQ583127P	0.72458	1.73976	1.22364	0.00058391	0.02171	1	RP11-379H18.1
407	piR-39243	hsa_piRNA_22828	DQ601177P	0.19984	0.45249	1.22417	0.00058101	0.02181	1
795	piR-55363	hsa_piRNA_6708	DQ588251P	0.09397	0.20667	1.22726	0.0022426	0.0431	1	FSHR
108	piR-53282	hsa_piRNA_8789	DQ586170P	0.18535	0.41814	1.22754	4.1719e-05	0.0059	0.63742	CACYBP,CACYBPP2
1542	piR-53409	hsa_piRNA_8662	DQ586297P	0.20274	0.39495	1.22772	0.0085631	0.08485	1	RP11-47P18.2,RP11-47P18.1,RP11-47P18.2,RP11-47P18.1
1347	piR-60309	hsa_piRNA_1762	DQ594197P	0.1638	0.31658	1.23052	0.0065212	0.07397	1
1070	piR-40472	hsa_piRNA_21599	DQ572360P	0.2466	0.54642	1.24688	0.0039378	0.05623	1	RP3-468B3.2
544	piR-56283	hsa_piRNA_5788	DQ589171P	0.74449	1.88986	1.26355	0.00101706	0.02857	1
394	piR-48992	hsa_piRNA_13079	DQ580880P	0.35355	0.81054	1.26736	0.00055866	0.02166	1	CBL
848	piR-46308	hsa_piRNA_15763	DQ578196P	3.50737	7.79359	1.27076	0.0025793	0.04647	1
808	piR-30129	hsa_piRNA_31942	DQ570017P	0.25004	0.56501	1.27108	0.0023369	0.04419	1	RP3-468B3.2
983	piR-39228	hsa_piRNA_22843	DQ601162P	0.62036	1.44175	1.28168	0.0032959	0.05123	1
1460	piR-46347	hsa_piRNA_15724	DQ578235P	2.58304	6.28247	1.28912	0.0076758	0.08033	1	C12orf57,RNU7-1
426	piR-41501	hsa_piRNA_20570	DQ573389P	0.16033	0.37603	1.29534	0.00062075	0.02226	1	NSUN4
580	piR-61663	hsa_piRNA_408	DQ595551P	0.51414	1.2524	1.29881	0.00113827	0.02999	1
588	piR-46678	hsa_piRNA_15393	DQ578566P	0.87131	2.21036	1.299	0.00118462	0.03078	1	NBPF14,NBPF14,NBPF8,NBPF10,NBPF10,NBPF10,NBPF10,NOTCH2NL,NBPF9,NBPF9,NBPF8,NBPF14,NBPF8,NBPF10,NBPF8,NBPF8,NBPF14,NOTCH2NL,NBPF14,NBPF10,NBPF14,NOTCH2NL,NBPF8,NBPF10,NBPF10,NOTCH2NL,NBPF14,NBPF10,NBPF14,NBPF8,NBPF14,NBPF14,NBPF14,NBPF8,NOTCH2NL,NBPF8,CH17-3B23.1,NBPF9,NBPF8,NBPF8,NBPF10,NBPF8,NBPF14,NBPF12,NBPF14,NBPF10,CH17-3B23.1,NBPF14,NBPF10,NBPF14,NBPF14,NBPF14,NBPF10,NBPF14,NBPF14,NBPF14,NB…
75	piR-58948	hsa_piRNA_3123	DQ591836P	0.09865	0.23905	1.29916	2.2336e-05	0.00455	0.34127
17	piR-36011	hsa_piRNA_26060	DQ597945P	0.76075	1.91486	1.30888	9.9064e-07	0.00089	0.01514
1286	piR-46514	hsa_piRNA_15557	DQ578402P	0.15531	0.31175	1.31458	0.0058958	0.07005	1	RP11-386M24.3
690	piR-52260	hsa_piRNA_9811	DQ585148P	0.16904	0.39533	1.31469	0.00166495	0.03687	1	CAND2
1343	piR-56326	hsa_piRNA_5745	DQ589214P	0.10332	0.23488	1.32699	0.0064579	0.07347	1	LINC00837
812	piR-45868	hsa_piRNA_16203	DQ577756P	0.25212	0.57175	1.3299	0.0023601	0.04441	1	SYN3
301	piR-51142	hsa_piRNA_10929	DQ584030P	0.6036	1.38833	1.33097	0.00031611	0.01605	1
243	piR-52740	hsa_piRNA_9331	DQ585628P	1.57469	3.97782	1.3448	0.00020445	0.01286	1	HLA-B,HLA-C
1622	piR-52319	hsa_piRNA_9752	DQ585207P	0.12059	0.28175	1.34684	0.0096238	0.09065	1
1582	piR-41943	hsa_piRNA_20128	DQ573831P	0.17673	0.38577	1.34977	0.0090196	0.08711	1	TUB
671	piR-33260	hsa_piRNA_28811	DQ593148P	0.14509	0.35587	1.34999	0.00157771	0.03593	1	RP3-468B3.2
1404	piR-46100	hsa_piRNA_15971	DQ577988P	0.12091	0.27361	1.35135	0.0071046	0.07732	1	RP11-299H22.3
937	piR-35808	hsa_piRNA_26263	DQ597742P	1.72559	4.04723	1.3541	0.0030033	0.04897	1
1462	piR-45597	hsa_piRNA_16474	DQ577485P	0.85286	2.30797	1.36239	0.0076798	0.08026	1	ZNF660,RP11-944L7.4,ZKSCAN7,RP11-944L7.5
1085	piR-56483	hsa_piRNA_5588	DQ589371P	0.81741	1.99112	1.37047	0.0040182	0.05658	1
1266	piR-52265	hsa_piRNA_9806	DQ585153P	0.12651	0.30369	1.37411	0.0057174	0.069	1
1163	piR-46791	hsa_piRNA_15280	DQ578679P	0.1409	0.3652	1.37828	0.004759	0.06252	1
1392	piR-49296	hsa_piRNA_12775	DQ581184P	0.50377	1.1736	1.37985	0.006979	0.0766	1	NOTCH2NL,NOTCH2NL,NOTCH2
941	piR-50036	hsa_piRNA_12035	DQ582924P	1.01344	2.74465	1.38122	0.0030401	0.04936	1
90	piR-57826	hsa_piRNA_4245	DQ590714P	0.12624	0.32628	1.3873	3.6763e-05	0.00624	0.5617	RP3-468B3.2
1488	piR-33832	hsa_piRNA_28239	DQ593720P	0.18451	0.35734	1.38878	0.0079801	0.08194	1
971	piR-39494	hsa_piRNA_22577	DQ601428P	1.9014	4.74352	1.38909	0.0032357	0.05091	1	LINC00905
1280	piR-41351	hsa_piRNA_20720	DQ573239P	0.09981	0.22596	1.39636	0.0057975	0.0692	1	CTC-559E9.9
1093	piR-58687	hsa_piRNA_3384	DQ591575P	0.11529	0.29613	1.39667	0.0040787	0.05702	1	RP11-164C12.2,RP11-266O8.1
1031	piR-57673	hsa_piRNA_4398	DQ590561P	0.7887	2.18594	1.40162	0.0035989	0.05333	1
552	piR-47121	hsa_piRNA_14950	DQ579009P	0.65632	1.70521	1.40425	0.00103972	0.02878	1	RP11-944L7.4,ZNF660,MPRIPP1,MPRIP,ZKSCAN7,RP11-944L7.5
69	piR-53360	hsa_piRNA_8711	DQ586248P	0.19377	0.51006	1.41525	2.1361e-05	0.00473	0.32637	CPM,AC096570.2,AC068490.2,ZNF131,UGT2B15
1231	piR-59424	hsa_piRNA_2647	DQ592312P	0.32851	0.71359	1.41696	0.0053984	0.067	1
380	piR-33973	hsa_piRNA_28098	DQ593861P	0.61104	1.66134	1.41948	0.00050166	0.02017	1	TDRP
409	piR-59072	hsa_piRNA_2999	DQ591960P	0.3252	0.80565	1.41987	0.00058257	0.02176	1	TMUB2
1521	piR-37939	hsa_piRNA_24132	DQ599873P	0.13225	0.31053	1.42571	0.0083756	0.08414	1	RP11-33B1.4,RP4-669L17.10,FAM157C,RP11-384K6.6,RP11-504P24.8,RP11-356C4.5,RP11-274B21.2,LINC01001,AC138035.2,RP4-669L17.10,RP11-304M2.3,AC138035.2,RP13-580B18.4,LINC01002
1103	piR-36565	hsa_piRNA_25506	DQ598499P	0.4716	1.25832	1.42938	0.0041987	0.05816	1	RP11-146D12.2,CYP4F26P
292	piR-39694	hsa_piRNA_22377	DQ601628P	4.9534	13.8849	1.4299	0.0002989	0.01564	1	LINC00707,ERICH1,TNFRSF8
255	piR-58749	hsa_piRNA_3322	DQ591637P	1.41261	3.59745	1.42994	0.00023985	0.01437	1	JOSD1
955	piR-36736	hsa_piRNA_25335	DQ598670P	0.32255	0.87401	1.43733	0.0031179	0.04988	1
1062	piR-34210	hsa_piRNA_27861	DQ596144P	1.85253	5.01411	1.44562	0.0038986	0.05609	1	TPPP
254	piR-56742	hsa_piRNA_5329	DQ589630P	0.91405	2.45328	1.45303	0.0002396	0.01441	1
906	piR-49381	hsa_piRNA_12690	DQ581269P	0.1175	0.30452	1.45554	0.0028569	0.04818	1
188	piR-41859	hsa_piRNA_20212	DQ573747P	0.28156	0.75327	1.46234	0.000117849	0.00958	1	RP13-39P12.2
239	piR-55283	hsa_piRNA_6788	DQ588171P	0.99308	2.715	1.46685	0.00020259	0.01295	1
1234	piR-30123	hsa_piRNA_31948	DQ570011P	0.3446	0.85318	1.46913	0.0054241	0.06716	1	TXNRD1
1032	piR-59296	hsa_piRNA_2775	DQ592184P	0.6329	1.76355	1.47498	0.0036223	0.05363	1	RP11-753D20.1
1426	piR-31124	hsa_piRNA_30947	DQ571012P	0.0958	0.22865	1.4792	0.0073786	0.07906	1
925	piR-46426	hsa_piRNA_15645	DQ578314P	0.11295	0.27578	1.48075	0.0029438	0.04863	1	FAM225B,FAM225A
669	piR-40471	hsa_piRNA_21600	DQ572359P	0.22262	0.59727	1.48941	0.0015607	0.03564	1	RP3-468B3.2
250	piR-37578	hsa_piRNA_24493	DQ599512P	0.27617	0.73052	1.49886	0.00022215	0.01358	1
1536	piR-54040	hsa_piRNA_8031	DQ586928P	0.28213	0.66314	1.511	0.0084842	0.08439	1	EYS,RP11-418J17.1,CTD-2215E18.1,LUZP2,SPATA6,ART3,GALNT11,ADIPOR2,BMPR2,C1orf112,A2ML1-AS1,ARHGEF7,CUBN,LINC01324,WDPCP,RP11-805L22.3,RP11-20D14.6,PI4K2B
1123	piR-57174	hsa_piRNA_4897	DQ590062P	0.44024	1.02655	1.52256	0.0044221	0.06016	1
844	piR-39370	hsa_piRNA_22701	DQ601304P	0.10612	0.2616	1.52263	0.0025612	0.04637	1	RP11-126O22.1
105	piR-48099	hsa_piRNA_13972	DQ579987P	0.79423	2.26876	1.52773	4.1089e-05	0.00598	0.6278	ZNFX1
146	piR-48636	hsa_piRNA_13435	DQ580524P	0.15727	0.43596	1.52805	7.6212e-05	0.00798	1	BX470102.3
1294	piR-37940	hsa_piRNA_24131	DQ599874P	0.11379	0.28873	1.5455	0.0059832	0.07065	1	RP11-304M2.3,RP13-580B18.4,AC138035.2,RP4-669L17.10,RP11-504P24.8,AC138035.2,RP11-384K6.6,FAM157C,RP11-33B1.4,RP11-356C4.5,RP11-274B21.2,LINC01001,LINC01002,RP4-669L17.10
601	piR-53051	hsa_piRNA_9020	DQ585939P	0.17515	0.48707	1.54882	0.0012431	0.0316	1	SPATA31D5P
269	piR-50623	hsa_piRNA_11448	DQ583511P	0.43689	1.26045	1.55471	0.0002598	0.01476	1	LINC01193
1090	piR-45540	hsa_piRNA_16531	DQ577428P	0.17427	0.48309	1.56062	0.0040428	0.05667	1	CTC-559E9.12
681	piR-31893	hsa_piRNA_30178	DQ571781P	0.53244	1.57891	1.57809	0.00161621	0.03626	1
979	piR-52550	hsa_piRNA_9521	DQ585438P	0.09669	0.2659	1.58349	0.0032637	0.05094	1	RP1-63G5.5,RP1-63G5.8,ELFN2
1310	piR-46485	hsa_piRNA_15586	DQ578373P	0.26072	0.66663	1.60134	0.0061367	0.07157	1	FAM225B,FAM225A
370	piR-45876	hsa_piRNA_16195	DQ577764P	0.11807	0.33551	1.60336	0.00047636	0.01967	1	AP000350.5
341	piR-55949	hsa_piRNA_6122	DQ588837P	0.39927	1.04831	1.60537	0.00040304	0.01806	1	SLC22A2
225	piR-41541	hsa_piRNA_20530	DQ573429P	0.09856	0.31064	1.60842	0.000178924	0.01215	1	LINC01015
1001	piR-46465	hsa_piRNA_15606	DQ578353P	0.19823	0.46422	1.61085	0.0034046	0.05197	1
949	piR-59955	hsa_piRNA_2116	DQ592843P	0.11569	0.3226	1.617	0.0030775	0.04955	1
780	piR-46196	hsa_piRNA_15875	DQ578084P	0.26165	0.81591	1.62077	0.0021573	0.04226	1
389	piR-35625	hsa_piRNA_26446	DQ597559P	0.55199	1.56702	1.62375	0.00054261	0.02131	1	RP11-299H22.3
340	piR-42479	hsa_piRNA_19592	DQ574367P	0.09214	0.27655	1.63734	0.00040223	0.01808	1
463	piR-32563	hsa_piRNA_29508	DQ582451P	0.26013	0.76105	1.64018	0.00071572	0.02362	1
570	piR-30074	hsa_piRNA_31997	DQ569962P	0.44921	1.54761	1.65373	0.00110349	0.02958	1	SKI
419	piR-57381	hsa_piRNA_4690	DQ590269P	0.10588	0.30197	1.65572	0.00060162	0.02194	1	STAT2
827	piR-60256	hsa_piRNA_1815	DQ594144P	0.40605	1.18153	1.67905	0.0024779	0.04578	1	RP11-944L7.5,RP11-944L7.4,ZKSCAN7
1453	piR-54029	hsa_piRNA_8042	DQ586917P	0.23601	0.83207	1.68806	0.007596	0.07988	1	RP11-944L7.5,ZNF660,ZKSCAN7,RP11-944L7.4
209	piR-41803	hsa_piRNA_20268	DQ573691P	0.10039	0.31185	1.69276	0.000156947	0.01147	1
684	piR-34795	hsa_piRNA_27276	DQ596729P	0.81058	2.5227	1.6928	0.00162252	0.03624	1
985	piR-42984	hsa_piRNA_19087	DQ574872P	0.13842	0.37897	1.69411	0.0033047	0.05126	1	ZKSCAN7,MPRIPP1,RP11-944L7.5,RP11-944L7.4,ZNF660,MPRIP
1284	piR-39992	hsa_piRNA_22079	DQ601926P	0.08682	0.24225	1.69773	0.0058795	0.06996	1	AP000350.10
1441	piR-57677	hsa_piRNA_4394	DQ590565P	0.32389	1.07779	1.70398	0.0074645	0.07915	1	UBAP1
290	piR-58552	hsa_piRNA_3519	DQ591440P	0.27639	0.89057	1.71048	0.00029555	0.01557	1	RRBP1
885	piR-57825	hsa_piRNA_4246	DQ590713P	0.12759	0.36614	1.72897	0.0027633	0.04771	1	RP3-468B3.2
1150	piR-57894	hsa_piRNA_4177	DQ590782P	0.14603	0.49784	1.72937	0.0046639	0.06196	1	RP11-509A17.3
139	piR-45462	hsa_piRNA_16609	DQ577350P	1.32717	4.37456	1.73389	6.314e-05	0.00694	0.96472
198	piR-48512	hsa_piRNA_13559	DQ580400P	1.78831	6.05693	1.74954	0.000123999	0.00957	1	RP11-108K3.1,CYP19A1
151	piR-32153	hsa_piRNA_29918	DQ582041P	0.09418	0.30579	1.75351	7.8375e-05	0.00793	1	LINC01016
252	piR-59501	hsa_piRNA_2570	DQ592389P	0.15567	0.50327	1.76222	0.00023545	0.01428	1
86	piR-45674	hsa_piRNA_16397	DQ577562P	1.38223	4.45217	1.78756	2.4938e-05	0.00443	0.38103
1353	piR-47157	hsa_piRNA_14914	DQ579045P	0.12542	0.38333	1.80338	0.0065551	0.07402	1
1170	piR-53289	hsa_piRNA_8782	DQ586177P	1.91564	6.91678	1.80622	0.0047991	0.06267	1	RP11-753D20.1
715	piR-37117	hsa_piRNA_24954	DQ599051P	0.13465	0.42163	1.80796	0.0017992	0.03845	1	CTC-523E23.4
1580	piR-45660	hsa_piRNA_16411	DQ577548P	1.08621	3.84718	1.81885	0.0090037	0.08707	1	RP1-63G5.5
504	piR-43536	hsa_piRNA_18535	DQ575424P	0.58156	2.18328	1.82262	0.00086232	0.02614	1
229	piR-58654	hsa_piRNA_3417	DQ591542P	0.39051	1.36636	1.8256	0.000181359	0.0121	1	RP11-146D12.2,FAM95B1
291	piR-32366	hsa_piRNA_29705	DQ582254P	0.15797	0.49515	1.83627	0.00029619	0.01555	1	GOLGA2P11,RP11-299H22.3
836	piR-54436	hsa_piRNA_7635	DQ587324P	0.1317	0.45495	1.85379	0.0025359	0.04635	1	LINC01016
859	piR-52340	hsa_piRNA_9731	DQ585228P	0.70142	2.43904	1.85596	0.0026229	0.04665	1	KRT18P28
614	piR-54204	hsa_piRNA_7867	DQ587092P	0.12533	0.41487	1.87863	0.00129728	0.03228	1
933	piR-50173	hsa_piRNA_11898	DQ583061P	0.47673	1.69078	1.89159	0.0029979	0.04909	1
564	piR-37888	hsa_piRNA_24183	DQ599822P	0.17553	0.53353	1.8959	0.00108288	0.02934	1	RNF213
320	piR-50515	hsa_piRNA_11556	DQ583403P	0.33347	1.33545	1.89964	0.00035797	0.01709	1	FTCDNL1
1224	piR-31890	hsa_piRNA_30181	DQ571778P	0.14972	0.53132	1.917	0.0052953	0.0661	1	RP11-19N8.4,RP11-19N8.4,HERC2P4
944	piR-51085	hsa_piRNA_10986	DQ583973P	0.15281	0.52052	1.92657	0.0030565	0.04947	1	MAP2K1
327	piR-32060	hsa_piRNA_30011	DQ581948P	0.78426	2.46535	1.93498	0.00037936	0.01773	1	RP11-299H22.3
494	piR-46512	hsa_piRNA_15559	DQ578400P	0.17187	0.61367	1.93531	0.00082052	0.02538	1	LINC01016,RP3-468B3.2
217	piR-61416	hsa_piRNA_655	DQ595304P	0.17941	0.71493	1.93802	0.000160216	0.01128	1	NR6A1
130	piR-47660	hsa_piRNA_14411	DQ579548P	0.84644	3.23616	1.9551	5.917e-05	0.00695	0.90406
1033	piR-58917	hsa_piRNA_3154	DQ591805P	0.36828	1.0049	1.95672	0.003624	0.0536	1
256	piR-62046	hsa_piRNA_25	DQ595934P	1.28285	5.1647	1.96109	0.00024006	0.01433	1
1065	piR-35509	hsa_piRNA_26562	DQ597443P	0.74576	2.93488	1.96783	0.0039199	0.05624	1
430	piR-47815	hsa_piRNA_14256	DQ579703P	0.11914	0.48429	1.97879	0.00062331	0.02215	1	ISY1-RAB43,ISY1
913	piR-47823	hsa_piRNA_14248	DQ579711P	9.74702	40.5418	1.985	0.0028798	0.04819	1
325	piR-53230	hsa_piRNA_8841	DQ586118P	1.49249	6.38015	1.98968	0.00037601	0.01768	1	FAM182A,FAM182B
1575	piR-61986	hsa_piRNA_85	DQ595874P	0.21997	0.8178	2.0019	0.0089642	0.08696	1	LINC01016
768	piR-57615	hsa_piRNA_4456	DQ590503P	0.16747	0.64051	2.02284	0.0020613	0.04101	1
895	piR-44828	hsa_piRNA_17243	DQ576716P	0.98955	4.17889	2.02693	0.0028032	0.04785	1	TMEM99
566	piR-56608	hsa_piRNA_5463	DQ589496P	0.43437	1.61278	2.03537	0.00109536	0.02957	1	SPATA8-AS1
725	piR-59295	hsa_piRNA_2776	DQ592183P	0.61228	2.54177	2.04736	0.0018388	0.03875	1	RP11-753D20.1
550	piR-54264	hsa_piRNA_7807	DQ587152P	1.44209	6.08219	2.04985	0.0010352	0.02876	1
300	piR-49982	hsa_piRNA_12089	DQ581870P	2.0488	8.56229	2.05687	0.00031575	0.01608	1	SPATA8-AS1
655	piR-57450	hsa_piRNA_4621	DQ590338P	0.15472	0.50173	2.0656	0.00150173	0.03503	1
605	piR-36313	hsa_piRNA_25758	DQ598247P	0.93346	4.3827	2.07134	0.00126242	0.03188	1
50	piR-56986	hsa_piRNA_5085	DQ589874P	0.17133	0.76278	2.0845	1.5026e-05	0.00459	0.22958
1329	piR-39688	hsa_piRNA_22383	DQ601622P	0.1364	0.4473	2.08629	0.0063398	0.07289	1	CTC-523E23.4
7	piR-51450	hsa_piRNA_10621	DQ584338P	0.20478	0.86343	2.09637	4.2413e-07	0.00093	0.00648	AKAP12
164	piR-55364	hsa_piRNA_6707	DQ588252P	0.40498	1.70471	2.11063	8.2842e-05	0.00772	1	RP11-289H16.1,BMS1
258	piR-45872	hsa_piRNA_16199	DQ577760P	0.12528	0.54758	2.11109	0.00024203	0.01433	1
1293	piR-55212	hsa_piRNA_6859	DQ588100P	0.6928	2.84605	2.11218	0.0059755	0.07061	1
140	piR-55452	hsa_piRNA_6619	DQ588340P	0.10753	0.43967	2.12017	6.3525e-05	0.00693	0.9706	STK40
1308	piR-50069	hsa_piRNA_12002	DQ582957P	0.15834	0.665	2.13222	0.0061204	0.07149	1	SEC16A
668	piR-34628	hsa_piRNA_27443	DQ596562P	0.16	0.67621	2.13772	0.00156036	0.03569	1
724	piR-52701	hsa_piRNA_9370	DQ585589P	0.64314	2.8353	2.14127	0.00183661	0.03876	1	FAM225A,FAM225B
1621	piR-56805	hsa_piRNA_5266	DQ589693P	6.06089	25.6111	2.15329	0.009599	0.09048	1
636	piR-61680	hsa_piRNA_391	DQ595568P	2.53869	11.2032	2.15625	0.00142311	0.03419	1
332	piR-30131	hsa_piRNA_31940	DQ570019P	0.15835	0.71395	2.16639	0.00038426	0.01768	1
163	piR-49095	hsa_piRNA_12976	DQ580983P	0.32772	1.41104	2.16842	8.2031e-05	0.00769	1	DDX4
349	piR-30315	hsa_piRNA_31756	DQ570203P	0.55713	2.63809	2.16978	0.00042212	0.01848	1
590	piR-49999	hsa_piRNA_12072	DQ581887P	2.21899	8.75711	2.17197	0.00119885	0.03105	1	SEC24C
1178	piR-58504	hsa_piRNA_3567	DQ591392P	0.70533	3.28133	2.17262	0.0048379	0.06275	1
557	piR-38387	hsa_piRNA_23684	DQ600321P	0.11699	0.47076	2.18198	0.0010785	0.02958	1	RP3-468B3.2
267	piR-47662	hsa_piRNA_14409	DQ579550P	0.42127	1.70302	2.1848	0.000259	0.01482	1	RP11-299H22.3
230	piR-46515	hsa_piRNA_15556	DQ578403P	0.08431	0.40629	2.20776	0.000181472	0.01206	1	RP11-386M24.3
445	piR-57640	hsa_piRNA_4431	DQ590528P	0.23388	0.87147	2.22272	0.00066346	0.02278	1	STAT2
134	piR-34263	hsa_piRNA_27808	DQ596197P	0.08923	0.43083	2.2317	6.0282e-05	0.00687	0.92105	TMEM181,TATDN2P2
975	piR-59076	hsa_piRNA_2995	DQ591964P	0.253	1.06539	2.23771	0.0032414	0.0508	1
495	piR-53290	hsa_piRNA_8781	DQ586178P	0.87341	4.23787	2.28716	0.00083548	0.02579	1	RP11-753D20.1
22	piR-35922	hsa_piRNA_26149	DQ597856P	0.28854	1.35387	2.28751	1.4105e-06	0.00098	0.02155	CTD-2047H16.4,RNF213
840	piR-57737	hsa_piRNA_4334	DQ590625P	0.34585	1.91589	2.28823	0.0025417	0.04623	1
436	piR-45250	hsa_piRNA_16821	DQ577138P	0.91898	4.449	2.30031	0.00064195	0.0225	1
603	piR-55372	hsa_piRNA_6699	DQ588260P	1.86127	9.49432	2.30692	0.00126114	0.03196	1
600	piR-33655	hsa_piRNA_28416	DQ593543P	0.24826	0.85927	2.31651	0.00124181	0.03162	1	LINC01016
4	piR-60064	hsa_piRNA_2007	DQ593952P	1.0314	5.08844	2.32183	3.4158e-07	0.0013	0.00522	CTD-2047H16.4,RNF213
359	piR-59382	hsa_piRNA_2689	DQ592270P	0.4939	2.80501	2.33094	0.00045795	0.01949	1	BMS1,RP11-289H16.1
704	piR-52256	hsa_piRNA_9815	DQ585144P	0.12944	0.5294	2.36655	0.00174183	0.0378	1
377	piR-61800	hsa_piRNA_271	DQ595688P	0.19724	0.8583	2.36726	0.00049631	0.02011	1
259	piR-53364	hsa_piRNA_8707	DQ586252P	0.69787	3.26984	2.36988	0.00024344	0.01436	1	RP11-299H22.3
115	piR-58806	hsa_piRNA_3265	DQ591694P	0.11467	0.63141	2.37592	4.2801e-05	0.00569	0.65396	RP11-753D20.1
331	piR-57610	hsa_piRNA_4461	DQ590498P	0.19233	1.07734	2.40335	0.00038376	0.01771	1	TTC6
138	piR-30177	hsa_piRNA_31894	DQ570065P	1.90858	9.43508	2.4167	6.287e-05	0.00696	0.96059
171	piR-47661	hsa_piRNA_14410	DQ579549P	0.43383	2.18912	2.4228	9.5959e-05	0.00857	1	RP11-299H22.3
390	piR-52873	hsa_piRNA_9198	DQ585761P	0.12446	0.64513	2.43839	0.0005428	0.02127	1
169	piR-62032	hsa_piRNA_39	DQ595920P	0.59055	3.15776	2.44655	9.5322e-05	0.00862	1
850	piR-33844	hsa_piRNA_28227	DQ593732P	0.67576	4.14077	2.45354	0.0025825	0.04642	1
91	piR-51209	hsa_piRNA_10862	DQ584097P	0.08431	0.44994	2.46976	3.6818e-05	0.00618	0.56254
1415	piR-40840	hsa_piRNA_21231	DQ572728P	2.75914	13.4674	2.47033	0.0072755	0.07856	1	RP1-101K10.6,MTRF1L,RP11-756P10.6
1172	piR-56758	hsa_piRNA_5313	DQ589646P	0.23015	1.15045	2.47423	0.0048017	0.0626	1	LINC00905
835	piR-58503	hsa_piRNA_3568	DQ591391P	0.98616	5.92343	2.4773	0.0025355	0.0464	1
1148	piR-34851	hsa_piRNA_27220	DQ596785P	0.23152	1.1393	2.47948	0.0046557	0.06196	1
371	piR-39890	hsa_piRNA_22181	DQ601824P	0.26307	1.03612	2.51052	0.00047738	0.01966	1
350	piR-43368	hsa_piRNA_18703	DQ575256P	0.24233	1.49318	2.5108	0.00042254	0.01845	1
298	piR-54542	hsa_piRNA_7529	DQ587430P	0.14496	0.69064	2.56443	0.00030457	0.01562	1	RP1-63G5.5
179	piR-57481	hsa_piRNA_4590	DQ590369P	0.23732	1.51814	2.57341	0.000100852	0.00861	1
404	piR-49979	hsa_piRNA_12092	DQ581867P	0.42601	2.35995	2.61867	0.00057888	0.02189	1	AC010084.1
197	piR-45140	hsa_piRNA_16931	DQ577028P	0.64405	4.31018	2.62215	0.000123474	0.00958	1
351	piR-56705	hsa_piRNA_5366	DQ589593P	0.28147	1.58299	2.62591	0.00042407	0.01846	1	GVINP1
147	piR-36683	hsa_piRNA_25388	DQ598617P	1.1897	7.74743	2.62788	7.7268e-05	0.00803	1
63	piR-37251	hsa_piRNA_24820	DQ599185P	0.08431	0.5014	2.64288	1.89126e-05	0.00459	0.28897
330	piR-42053	hsa_piRNA_20018	DQ573941P	0.12689	0.77913	2.64332	0.00038348	0.01776	1
435	piR-60610	hsa_piRNA_1461	DQ594498P	0.18068	1.26656	2.65016	0.00064103	0.02252	1
186	piR-58005	hsa_piRNA_4066	DQ590893P	0.11673	0.71781	2.68671	0.000117542	0.00966	1
150	piR-57406	hsa_piRNA_4665	DQ590294P	0.54556	3.39762	2.69859	7.8281e-05	0.00797	1
1250	piR-47460	hsa_piRNA_14611	DQ579348P	0.74659	5.04276	2.72522	0.005559	0.06795	1	CDIP1
47	piR-57045	hsa_piRNA_5026	DQ589933P	0.11345	0.7822	2.74821	4.211e-06	0.00137	0.06434	NPIPA1,NPIPA3
654	piR-58893	hsa_piRNA_3178	DQ591781P	0.16495	1.21046	2.7588	0.00149977	0.03504	1	RP11-386M24.3
263	piR-60683	hsa_piRNA_1388	DQ594571P	0.48903	3.62698	2.77758	0.00025704	0.01493	1
34	piR-52204	hsa_piRNA_9867	DQ585092P	0.11416	0.827	2.78124	2.6738e-06	0.0012	0.04085
1599	piR-43006	hsa_piRNA_19065	DQ574894P	0.1632	1.19747	2.79971	0.0093184	0.08904	1
246	piR-57307	hsa_piRNA_4764	DQ590195P	0.5112	3.54441	2.80868	0.0002154	0.01338	1	RP1-81D8.3
66	piR-40148	hsa_piRNA_21923	DQ572036P	0.27853	1.99149	2.8132	2.0108e-05	0.00466	0.30723	TRAP1,DNASE1
589	piR-58502	hsa_piRNA_3569	DQ591390P	0.5853	4.50446	2.81693	0.00119663	0.03104	1
595	piR-61681	hsa_piRNA_390	DQ595569P	0.6445	5.09047	2.84764	0.00122192	0.03138	1
879	piR-48717	hsa_piRNA_13354	DQ580605P	0.12535	0.98943	2.88211	0.0027357	0.04755	1	ZNF778,ZNF778,ZNF778,ZNF778,ZNF778
307	piR-35546	hsa_piRNA_26525	DQ597480P	0.68173	5.0932	2.88916	0.00032141	0.016	1	EIF3C,RP11-57A19.4,RP11-1348G14.4
574	piR-54186	hsa_piRNA_7885	DQ587074P	0.0953	0.56588	2.89754	0.00111714	0.02974	1	RP1-37N7.5,EVPLL,RP11-434D2.11,RP1-37N7.1
874	piR-32454	hsa_piRNA_29617	DQ582342P	0.08596	0.54315	2.93708	0.0026996	0.04719	1	LINC00837
1042	piR-51401	hsa_piRNA_10670	DQ584289P	0.30359	1.82666	2.97835	0.003684	0.05402	1	NOD2
296	piR-45139	hsa_piRNA_16932	DQ577027P	0.42602	3.63315	2.98135	0.00030279	0.01563	1
84	piR-59251	hsa_piRNA_2820	DQ592139P	0.08648	0.71705	3.01167	2.4498e-05	0.00446	0.3743	TRIM14
181	piR-43724	hsa_piRNA_18347	DQ575612P	0.91741	8.02485	3.06212	0.000102226	0.00863	1
312	piR-54543	hsa_piRNA_7528	DQ587431P	0.08431	0.75448	3.06283	0.00032379	0.01586	1
174	piR-54824	hsa_piRNA_7247	DQ587712P	0.09498	0.72003	3.09502	9.7474e-05	0.00856	1	HSPA1A,HSPA1B
311	piR-53868	hsa_piRNA_8203	DQ586756P	1.13885	10.6225	3.09872	0.00032312	0.01587	1	RP11-753D20.1
278	piR-30680	hsa_piRNA_31391	DQ570568P	0.11227	0.95948	3.10643	0.00027585	0.01516	1	PRMT8
262	piR-40499	hsa_piRNA_21572	DQ572387P	0.0983	0.91908	3.11822	0.00025621	0.01494	1
132	piR-57349	hsa_piRNA_4722	DQ590237P	0.48202	3.80625	3.12831	5.9719e-05	0.00691	0.91245	RP11-266L9.5
536	piR-61011	hsa_piRNA_1060	DQ594899P	0.32741	2.68815	3.1365	0.00096315	0.02746	1
1601	piR-57617	hsa_piRNA_4454	DQ590505P	3.14402	27.2185	3.1371	0.0093352	0.08909	1
281	piR-55229	hsa_piRNA_6842	DQ588117P	0.09652	0.95351	3.16698	0.00027883	0.01516	1	AC009784.3,CYP19A1,ETFA,KIAA1257,ACSM3,RP11-108K3.1,NCOA7,RP11-723O4.6,ACSM1
833	piR-35947	hsa_piRNA_26124	DQ597881P	0.25393	2.66674	3.22053	0.0025003	0.04586	1	AC133633.2
79	piR-37250	hsa_piRNA_24821	DQ599184P	0.08431	0.72618	3.22526	2.3375e-05	0.00452	0.35715	RSAD2
347	piR-57713	hsa_piRNA_4358	DQ590601P	0.09049	0.9013	3.24795	0.0004193	0.01846	1	RP11-509A17.3
930	piR-30682	hsa_piRNA_31389	DQ570570P	0.08431	0.90412	3.24952	0.0029763	0.0489	1
439	piR-50777	hsa_piRNA_11294	DQ583665P	0.08431	0.90306	3.28966	0.00064489	0.02244	1	TPST1
113	piR-57585	hsa_piRNA_4486	DQ590473P	0.19212	1.73844	3.3179	4.2251e-05	0.00571	0.64555	LY6E
634	piR-60861	hsa_piRNA_1210	DQ594749P	0.08431	0.96596	3.35931	0.00141691	0.03415	1	NKD1
45	piR-59043	hsa_piRNA_3028	DQ591931P	0.09348	0.91071	3.36694	4.0259e-06	0.00137	0.06151	LINC00837
319	piR-50172	hsa_piRNA_11899	DQ583060P	0.09259	1.08211	3.41617	0.00035558	0.01703	1
265	piR-44818	hsa_piRNA_17253	DQ576706P	0.90818	7.81526	3.43755	0.0002582	0.01489	1	TMEM99
346	piR-60848	hsa_piRNA_1223	DQ594736P	0.46376	5.4871	3.44698	0.00041903	0.0185	1
154	piR-59041	hsa_piRNA_3030	DQ591929P	0.15746	1.48427	3.48595	7.9043e-05	0.00784	1	LINC00837
82	piR-55340	hsa_piRNA_6731	DQ588228P	0.15986	1.51214	3.48949	2.3507e-05	0.00438	0.35916
645	piR-48124	hsa_piRNA_13947	DQ580012P	0.40381	5.20286	3.50006	0.00146024	0.03459	1	LRIG2,RLIMP2
1299	piR-61179	hsa_piRNA_892	DQ595067P	3.81248	38.6297	3.51808	0.006077	0.07148	1
183	piR-48580	hsa_piRNA_13491	DQ580468P	0.34859	4.66602	3.5827	0.000103279	0.00862	1
95	piR-50713	hsa_piRNA_11358	DQ583601P	1.19485	14.9545	3.62327	3.7826e-05	0.00608	0.57794	PWP2
1137	piR-35252	hsa_piRNA_26819	DQ597186P	0.37844	4.88764	3.68048	0.0045619	0.0613	1	CTC-559E9.12
80	piR-57715	hsa_piRNA_4356	DQ590603P	0.20238	2.6557	3.69361	2.3479e-05	0.00448	0.35874	RP11-753D20.1
207	piR-49735	hsa_piRNA_12336	DQ581623P	0.1965	2.86867	3.72061	0.000143006	0.01056	1
48	piR-49196	hsa_piRNA_12875	DQ581084P	0.23387	3.15815	3.77446	4.4072e-06	0.0014	0.06734	CTC-351M12.1
117	piR-54545	hsa_piRNA_7526	DQ587433P	0.12662	1.80815	3.81844	4.3278e-05	0.00565	0.66124	RP1-63G5.5
734	piR-30681	hsa_piRNA_31390	DQ570569P	0.08431	1.35404	3.82499	0.00187703	0.03907	1
1028	piR-44611	hsa_piRNA_17460	DQ576499P	0.09356	0.97504	3.82657	0.0035787	0.05319	1	TCP10L2,TCP10
872	piR-32150	hsa_piRNA_29921	DQ582038P	0.08745	1.39213	3.85417	0.0026975	0.04727	1	TBC1D3P4,TBC1D3P3,USP6
967	piR-54790	hsa_piRNA_7281	DQ587678P	1.29635	17.506	3.92199	0.0032207	0.05089	1	RP11-29H23.5
398	piR-54544	hsa_piRNA_7527	DQ587432P	0.13226	2.1373	3.95665	0.00056339	0.02163	1	RP1-63G5.5
59	piR-57716	hsa_piRNA_4355	DQ590604P	0.24544	3.67623	3.98846	1.71594e-05	0.00444	0.26218	RP11-753D20.1
304	piR-59461	hsa_piRNA_2610	DQ592349P	0.76244	12.1694	4.08513	0.00031946	0.01606	1	ZNHIT6
743	piR-51360	hsa_piRNA_10711	DQ584248P	0.08881	1.65863	4.10092	0.00192259	0.03954	1	USP6,TBC1D3P3,TBC1D3P4
121	piR-46296	hsa_piRNA_15775	DQ578184P	0.10451	1.69739	4.13207	5.6149e-05	0.00709	0.8579	LINC00837
525	piR-34592	hsa_piRNA_27479	DQ596526P	0.54033	7.68496	4.13806	0.00092245	0.02685	1
19	piR-59042	hsa_piRNA_3029	DQ591930P	0.08842	1.55968	4.1421	1.0428e-06	0.00084	0.01593	LINC00837
786	piR-35633	hsa_piRNA_26438	DQ597567P	0.84961	15.6489	4.16025	0.0021803	0.04238	1	CAND2
29	piR-55300	hsa_piRNA_6771	DQ588188P	0.08431	1.42233	4.18068	2.2783e-06	0.0012	0.03481
202	piR-36312	hsa_piRNA_25759	DQ598246P	0.25559	5.22567	4.21848	0.000135688	0.01026	1
37	piR-31921	hsa_piRNA_30150	DQ571809P	0.08639	1.72953	4.28757	3.1275e-06	0.00129	0.04779
193	piR-61637	hsa_piRNA_434	DQ595525P	0.60282	13.3554	4.36311	0.000121593	0.00963	1	LINC00964
336	piR-50723	hsa_piRNA_11348	DQ583611P	2.93068	61.373	4.3923	0.00039732	0.01807	1
24	piR-33968	hsa_piRNA_28103	DQ593856P	0.09404	2.09864	4.41295	1.6128e-06	0.00103	0.02464	RP11-545A16.3
15	piR-31114	hsa_piRNA_30957	DQ571002P	0.12746	2.85923	4.46929	7.4042e-07	0.00075	0.01131	CHD1L,LINC00624
155	piR-58809	hsa_piRNA_3262	DQ591697P	0.33408	7.69047	4.48424	7.934e-05	0.00782	1
30	piR-59040	hsa_piRNA_3031	DQ591928P	0.11198	2.46122	4.50403	2.3373e-06	0.00119	0.03571	LINC00837
40	piR-54546	hsa_piRNA_7525	DQ587434P	0.11591	2.82586	4.5897	3.1911e-06	0.00122	0.04876	RP1-63G5.5
101	piR-54547	hsa_piRNA_7524	DQ587435P	0.09343	2.4556	4.6308	3.9308e-05	0.00595	0.60059
295	piR-51361	hsa_piRNA_10710	DQ584249P	0.19424	5.64291	4.6819	0.000301	0.01559	1	TBC1D3P4,USP6,TBC1D3P3
44	piR-54439	hsa_piRNA_7632	DQ587327P	0.1093	3.07809	4.76455	3.6691e-06	0.00127	0.05606	RP11-386M24.3
652	piR-60602	hsa_piRNA_1469	DQ594490P	0.21762	6.65076	4.85346	0.00149528	0.03504	1
563	piR-33637	hsa_piRNA_28434	DQ593525P	0.08728	1.96172	4.86786	0.00108238	0.02937	1	PDXDC1
523	piR-54862	hsa_piRNA_7209	DQ587750P	0.38951	13.8275	4.9432	0.00092143	0.02692	1
53	piR-33317	hsa_piRNA_28754	DQ593205P	0.13293	4.3971	5.10063	1.5092e-05	0.00435	0.23059
8	piR-55323	hsa_piRNA_6748	DQ588211P	0.1024	3.5794	5.10624	4.9604e-07	0.00095	0.00758	RNF219-AS1
505	piR-61473	hsa_piRNA_598	DQ595361P	0.25629	10.5689	5.12539	0.00086282	0.02611	1
77	piR-57616	hsa_piRNA_4455	DQ590504P	0.10944	3.71247	5.19206	2.2447e-05	0.00445	0.34297	NBPF11,NBPF12
185	piR-43353	hsa_piRNA_18718	DQ575241P	0.08959	3.52716	5.20865	0.00011553	0.00954	1
14	piR-54879	hsa_piRNA_7192	DQ587767P	0.08741	3.40312	5.21594	7.2135e-07	0.00079	0.01102
58	piR-54343	hsa_piRNA_7728	DQ587231P	0.16319	6.92353	5.36658	1.66243e-05	0.00438	0.254	RP11-753D20.1
81	piR-48109	hsa_piRNA_13962	DQ579997P	0.24964	10.253	5.40596	2.3479e-05	0.00443	0.35874	MRPL45P1
641	piR-53025	hsa_piRNA_9046	DQ585913P	0.71446	25.6118	5.43341	0.0014449	0.03444	1	CAND2
20	piR-42026	hsa_piRNA_20045	DQ573914P	0.11104	5.28849	5.52621	1.124e-06	0.00086	0.01717	AC093627.9
133	piR-39104	hsa_piRNA_22967	DQ601038P	0.23829	11.7761	5.55376	6.004e-05	0.0069	0.91735	CTD-2210P24.1
372	piR-43562	hsa_piRNA_18509	DQ575450P	0.12611	7.11033	5.60861	0.0004799	0.01971	1
61	piR-36763	hsa_piRNA_25308	DQ598697P	0.08431	4.82065	6.05578	1.79466e-05	0.0045	0.27421	RP11-20I23.6,PDPK1,AC141586.5,PDPK2P
107	piR-57764	hsa_piRNA_4307	DQ590652P	0.09758	7.39919	6.21118	4.1573e-05	0.00594	0.63519	CTC-523E23.5,CTC-523E23.11
25	piR-49367	hsa_piRNA_12704	DQ581255P	0.11075	8.92718	6.38534	1.6632e-06	0.00102	0.02541	SUCLG1
196	piR-45936	hsa_piRNA_16135	DQ577824P	0.1395	14.6605	6.9292	0.00012329	0.00961	1	CTC-523E23.5,CTC-523E23.11
16	piR-32201	hsa_piRNA_29870	DQ582089P	1.0573	148.066	7.08183	7.9577e-07	0.00076	0.01216
9	piR-54651	hsa_piRNA_7420	DQ587539P	0.24163	35.5766	7.26823	5.8491e-07	0.00099	0.00894	ANKRD18A,RP11-146D12.2,PLEKHB2,RP11-392E22.11,PLEKHB2,ANKRD18A,PLEKHB2,PLEKHB2,LINC01087,PLEKHB2
5	piR-50722	hsa_piRNA_11349	DQ583610P	0.39947	63.3064	7.33121	3.9863e-07	0.00122	0.00609	ANKRD18A,FAR2P1,LINC01087,RP11-146D12.2,ANKRD18A,LINC01297,PLEKHB2,PLEKHB2,ANKRD18A,PLEKHB2,RP11-146D12.2,PLEKHB2,PLEKHB2,PLEKHB2,bP-21264C1.2,ANKRD18A,PLEKHB2,PLEKHB2,PLEKHB2,RP11-392E22.11,PLEKHB2
3	piR-32372	hsa_piRNA_29699	DQ582260P	0.211	52.7267	8.03176	3.1588e-07	0.00161	0.00483	PLEKHB2,LINC01087,PLEKHB2,PLEKHB2,PLEKHB2,ANKRD18A,FAR2P1,PLEKHB2,PLEKHB2,PLEKHB2,RP11-146D12.2,RP11-392E22.11,ANKRD18A,PLEKHB2,PLEKHB2,LINC01297,bP-21264C1.2,PLEKHB2,ANKRD18A,PLEKHB2,ANKRD18A,RP11-146D12.2
10	piR-61160	hsa_piRNA_911	DQ595048P	1.02025	318.438	8.24576	6.2689e-07	0.00096	0.00958	LINC01297,PLEKHB2,PLEKHB2,PLEKHB2,PLEKHB2,PLEKHB2,bP-21264C1.2,LINC01087,PLEKHB2,RP11-146D12.2,PLEKHB2,PLEKHB2,PLEKHB2,RP11-146D12.2,RP11-392E22.11,ANKRD18A,ANKRD18A,ANKRD18A,PLEKHB2,ANKRD18A
54	piR-47139	hsa_piRNA_14932	DQ579027P	0.28104	101.962	8.57954	1.56595e-05	0.00443	0.23926
11	piR-37886	hsa_piRNA_24185	DQ599820P	0.09018	33.7843	8.67967	6.2896e-07	0.00087	0.00961
6	piR-61505	hsa_piRNA_566	DQ595393P	1.80731	1075.12	9.4183	4.1481e-07	0.00106	0.00634
1	piR-38587	hsa_piRNA_23484	DQ600521P	0.08954	89.5128	9.97658	4.3673e-08	0.00067	0.00067	AP5Z1,FOXK1

## Sheet: S4
Analysis Type:	PANTHER Overrepresentation Test (Released 20220202)
Annotation Version and Release Date:	GO Ontology database DOI: 10.5281/zenodo.5725227 Released 2020-11-01
Analyzed List:	targets_Both_2021_times_0_1_norm_median_point_log_pv_0.01.tsv (Homo sapiens)
Reference List:	Homo sapiens (all genes in database)
Test Type:	FISHER
Correction:	FDR
GO biological process complete	Homo sapiens - REFLIST (20589)	targets_Both_2021_times_0_1_norm_median_point_log_pv_0.01.tsv (299)	targets_Both_2021_times_0_1_norm_median_point_log_pv_0.01.tsv (expected)	targets_Both_2021_times_0_1_norm_median_point_log_pv_0.01.tsv (over/under)	targets_Both_2021_times_0_1_norm_median_point_log_pv_0.01.tsv (fold Enrichment)	targets_Both_2021_times_0_1_norm_median_point_log_pv_0.01.tsv (raw P-value)	targets_Both_2021_times_0_1_norm_median_point_log_pv_0.01.tsv (FDR)
Golgi organization (GO:0007030)	145	16	2.11	+	7.6	1.46e-09	2.28e-05
endomembrane system organization (GO:0010256)	506	25	7.35	+	3.4	2.14e-07	0.00168
organelle organization (GO:0006996)	3326	80	48.3	+	1.66	3.94e-06	0.0206

## Sheet: S5
Analysis Type:	PANTHER Overrepresentation Test (Released 20220202)
Annotation Version and Release Date:	GO Ontology database DOI: 10.5281/zenodo.5725227 Released 2020-11-01
Analyzed List:	targets_Both_2021_times_0_1_norm_median_point_log_pv_0.01.tsv (Homo sapiens)
Reference List:	Homo sapiens (all genes in database)
Test Type:	FISHER
Correction:	FDR
GO cellular component complete	Homo sapiens - REFLIST (20589)	targets_Both_2021_times_0_1_norm_median_point_log_pv_0.01.tsv (299)	targets_Both_2021_times_0_1_norm_median_point_log_pv_0.01.tsv (expected)	targets_Both_2021_times_0_1_norm_median_point_log_pv_0.01.tsv (over/under)	targets_Both_2021_times_0_1_norm_median_point_log_pv_0.01.tsv (fold Enrichment)	targets_Both_2021_times_0_1_norm_median_point_log_pv_0.01.tsv (raw P-value)	targets_Both_2021_times_0_1_norm_median_point_log_pv_0.01.tsv (FDR)
chromosome, centromeric core domain (GO:0034506)	5	3	0.07	+	41.32	0.000154	0.0313
Golgi cis cisterna (GO:0000137)	30	16	0.44	+	36.73	1.4e-18	2.84e-15
cis-Golgi network (GO:0005801)	73	16	1.06	+	15.09	1.44e-13	9.7e-11
Golgi cisterna membrane (GO:0032580)	94	18	1.37	+	13.19	3.23e-14	3.27e-11
Golgi cisterna (GO:0031985)	120	18	1.74	+	10.33	1.32e-12	6.67e-10
Golgi stack (GO:0005795)	153	18	2.22	+	8.1	5.15e-11	2.09e-08
Golgi apparatus subcompartment (GO:0098791)	396	25	5.75	+	4.35	2.27e-09	7.68e-07
organelle subcompartment (GO:0031984)	1492	44	21.67	+	2.03	9.68e-06	0.0028
Golgi apparatus (GO:0005794)	1617	45	23.48	+	1.92	3.34e-05	0.00847
organelle membrane (GO:0031090)	3647	79	52.96	+	1.49	0.000184	0.0338
endomembrane system (GO:0012505)	4682	97	67.99	+	1.43	0.00013	0.0292

## Sheet: S6
Analysis Type:	PANTHER Overrepresentation Test (Released 20220202)
Annotation Version and Release Date:	GO Ontology database DOI: 10.5281/zenodo.5725227 Released 2020-11-01
Analyzed List:	targets_Both_2021_times_0_1_norm_median_point_log_pv_0.01.tsv (Homo sapiens)
Reference List:	Homo sapiens (all genes in database)
Test Type:	FISHER
Correction:	FDR
GO molecular function complete	Homo sapiens - REFLIST (20589)	targets_Both_2021_times_0_1_norm_median_point_log_pv_0.01.tsv (299)	targets_Both_2021_times_0_1_norm_median_point_log_pv_0.01.tsv (expected)	targets_Both_2021_times_0_1_norm_median_point_log_pv_0.01.tsv (over/under)	targets_Both_2021_times_0_1_norm_median_point_log_pv_0.01.tsv (fold Enrichment)	targets_Both_2021_times_0_1_norm_median_point_log_pv_0.01.tsv (raw P-value)	targets_Both_2021_times_0_1_norm_median_point_log_pv_0.01.tsv (FDR)

## Sheet: S7
Analysis Type:	PANTHER Overrepresentation Test (Released 20220202)
Annotation Version and Release Date:	GO Ontology database DOI: 10.5281/zenodo.5725227 Released 2020-11-01
Analyzed List:	targets_Both_2021_times_0_2_norm_median_point_log_pv_0.01.tsv (Homo sapiens)
Reference List:	Homo sapiens (all genes in database)
Test Type:	FISHER
Correction:	FDR
GO biological process complete	Homo sapiens - REFLIST (20589)	targets_Both_2021_times_0_2_norm_median_point_log_pv_0.01.tsv (491)	targets_Both_2021_times_0_2_norm_median_point_log_pv_0.01.tsv (expected)	targets_Both_2021_times_0_2_norm_median_point_log_pv_0.01.tsv (over/under)	targets_Both_2021_times_0_2_norm_median_point_log_pv_0.01.tsv (fold Enrichment)	targets_Both_2021_times_0_2_norm_median_point_log_pv_0.01.tsv (raw P-value)	targets_Both_2021_times_0_2_norm_median_point_log_pv_0.01.tsv (FDR)
Golgi organization (GO:0007030)	145	17	3.46	+	4.92	2.55e-07	0.004
G protein-coupled receptor signaling pathway (GO:0007186)	1221	8	29.12	-	0.27	5.6e-06	0.0439

## Sheet: S8
Analysis Type:	PANTHER Overrepresentation Test (Released 20220202)
Annotation Version and Release Date:	GO Ontology database DOI: 10.5281/zenodo.5725227 Released 2020-11-01
Analyzed List:	targets_Both_2021_times_0_2_norm_median_point_log_pv_0.01.tsv (Homo sapiens)
Reference List:	Homo sapiens (all genes in database)
Test Type:	FISHER
Correction:	FDR
GO cellular component complete	Homo sapiens - REFLIST (20589)	targets_Both_2021_times_0_2_norm_median_point_log_pv_0.01.tsv (491)	targets_Both_2021_times_0_2_norm_median_point_log_pv_0.01.tsv (expected)	targets_Both_2021_times_0_2_norm_median_point_log_pv_0.01.tsv (over/under)	targets_Both_2021_times_0_2_norm_median_point_log_pv_0.01.tsv (fold Enrichment)	targets_Both_2021_times_0_2_norm_median_point_log_pv_0.01.tsv (raw P-value)	targets_Both_2021_times_0_2_norm_median_point_log_pv_0.01.tsv (FDR)
Golgi cis cisterna (GO:0000137)	30	16	0.72	+	22.36	3.07e-15	6.23e-12
cis-Golgi network (GO:0005801)	73	17	1.74	+	9.77	2.59e-11	2.63e-08
Golgi cisterna membrane (GO:0032580)	94	17	2.24	+	7.58	8.07e-10	5.45e-07
Golgi cisterna (GO:0031985)	120	17	2.86	+	5.94	2.14e-08	1.08e-05
nucleosome (GO:0000786)	95	12	2.27	+	5.3	7.45e-06	0.00137
DNA packaging complex (GO:0044815)	103	12	2.46	+	4.89	1.57e-05	0.00265
Golgi stack (GO:0005795)	153	17	3.65	+	4.66	5.09e-07	0.000206
cytosolic ribosome (GO:0022626)	103	11	2.46	+	4.48	7.28e-05	0.00867
ribosome (GO:0005840)	223	16	5.32	+	3.01	0.000164	0.0185
Golgi apparatus subcompartment (GO:0098791)	396	25	9.44	+	2.65	2.06e-05	0.00299
intracellular non-membrane-bounded organelle (GO:0043232)	5124	163	122.2	+	1.33	4.73e-05	0.00639
non-membrane-bounded organelle (GO:0043228)	5124	163	122.2	+	1.33	4.73e-05	0.00599
nucleus (GO:0005634)	7635	229	182.08	+	1.26	2.04e-05	0.00318
intracellular membrane-bounded organelle (GO:0043231)	12072	342	287.89	+	1.19	7.89e-07	0.000228
intracellular organelle (GO:0043229)	13153	366	313.67	+	1.17	6.77e-07	0.000229
membrane-bounded organelle (GO:0043227)	13135	364	313.24	+	1.16	1.79e-06	0.000362
organelle (GO:0043226)	13962	382	332.96	+	1.15	1.48e-06	0.000333
intracellular anatomical structure (GO:0005622)	14866	402	354.52	+	1.13	1.08e-06	0.000274

## Sheet: S9
Analysis Type:	PANTHER Overrepresentation Test (Released 20220202)
Annotation Version and Release Date:	GO Ontology database DOI: 10.5281/zenodo.5725227 Released 2020-11-01
Analyzed List:	targets_Both_2021_times_0_2_norm_median_point_log_pv_0.01.tsv (Homo sapiens)
Reference List:	Homo sapiens (all genes in database)
Test Type:	FISHER
Correction:	FDR
GO molecular function complete	Homo sapiens - REFLIST (20589)	targets_Both_2021_times_0_2_norm_median_point_log_pv_0.01.tsv (491)	targets_Both_2021_times_0_2_norm_median_point_log_pv_0.01.tsv (expected)	targets_Both_2021_times_0_2_norm_median_point_log_pv_0.01.tsv (over/under)	targets_Both_2021_times_0_2_norm_median_point_log_pv_0.01.tsv (fold Enrichment)	targets_Both_2021_times_0_2_norm_median_point_log_pv_0.01.tsv (raw P-value)	targets_Both_2021_times_0_2_norm_median_point_log_pv_0.01.tsv (FDR)
GTPase activator activity (GO:0005096)	276	20	6.58	+	3.04	2.28e-05	0.0371
nucleic acid binding (GO:0003676)	3997	134	95.32	+	1.41	3.2e-05	0.0313
organic cyclic compound binding (GO:0097159)	6043	188	144.11	+	1.3	3.1e-05	0.0379
heterocyclic compound binding (GO:1901363)	5968	185	142.32	+	1.3	4.51e-05	0.0316
molecular transducer activity (GO:0060089)	1552	15	37.01	-	0.41	5.32e-05	0.0325
signaling receptor activity (GO:0038023)	1552	15	37.01	-	0.41	5.32e-05	0.0289
transmembrane signaling receptor activity (GO:0004888)	1331	7	31.74	-	0.22	1.65e-07	0.000405
G protein-coupled receptor activity (GO:0004930)	884	1	21.08	-	0.05	2.01e-08	9.86e-05
olfactory receptor activity (GO:0004984)	441	0	10.52	-	< 0.01	4.34e-05	0.0354

[truncated: 10 more sheets: S10, S11, S12, S13, S14,  S15 Cluster 0, S15 Cluster 1, S15 Cluster 2, S15 Cluster 3, S15 Cluster 4]
